# Supplementary material
Source: Royal Society of Chemistry journal article supplement (doi:10.1039/d6cp00987e)
Supplement: d6cp00987e1.pdf [file d6cp00987e1.pdf]

Supplementary information for

## Near infrared spectroscopy of micro-solvated protonated methanol

Yaodi Yang,<sup>a</sup> Qian-Rui Huang,<sup>b</sup> Jer-Lai Kuo,<sup>\*b</sup> and Asuka Fujii<sup>\*a</sup>

<sup>a</sup> *Department of Chemistry, Graduate School of Science, Tohoku University, Sendai, Japan*

<sup>b</sup> *Institute of Atomic and Molecular Sciences, Academia Sinica, Taipei, Taiwan*

Email: [jlkuo@pub.iams.sinica.edu.tw](mailto:jlkuo@pub.iams.sinica.edu.tw) (J.-L. K.), [asuka.fujii.e5@tohoku.ac.jp](mailto:asuka.fujii.e5@tohoku.ac.jp) (A.F.)

### Contents

**Figure S1.** Selected Localized Normal Modes of  $\text{MeOH}_2^+\cdots\text{N}_2$  Used in DVR-FBR Calculations.

**Figure S2.** Convergence Test for the DVR-FBR Calculation.

**Figure S3.** Hot Band Simulation.

**Table S1.** Cartesian Coordinates of  $\text{MeOH}_2^+\cdots\text{X}_n$  ( $\text{X} = \text{Ar}, \text{N}_2, \text{and CO}; n = 1 \text{ and } 2$ ) Optimized at MP2/aug-cc-pVDZ.

**Table S2.** Selected Localized Normal Modes Frequencies and Intensities of  $\text{MeOH}_2^+\cdots\text{X}_n$  ( $\text{X} = \text{Ar}, \text{N}_2, \text{and CO}; n = 1 \text{ and } 2$ ) Evaluated at MP2/aug-cc-pVDZ.

**Table S3.** Assignment and Projection of the Pronounced Peaks

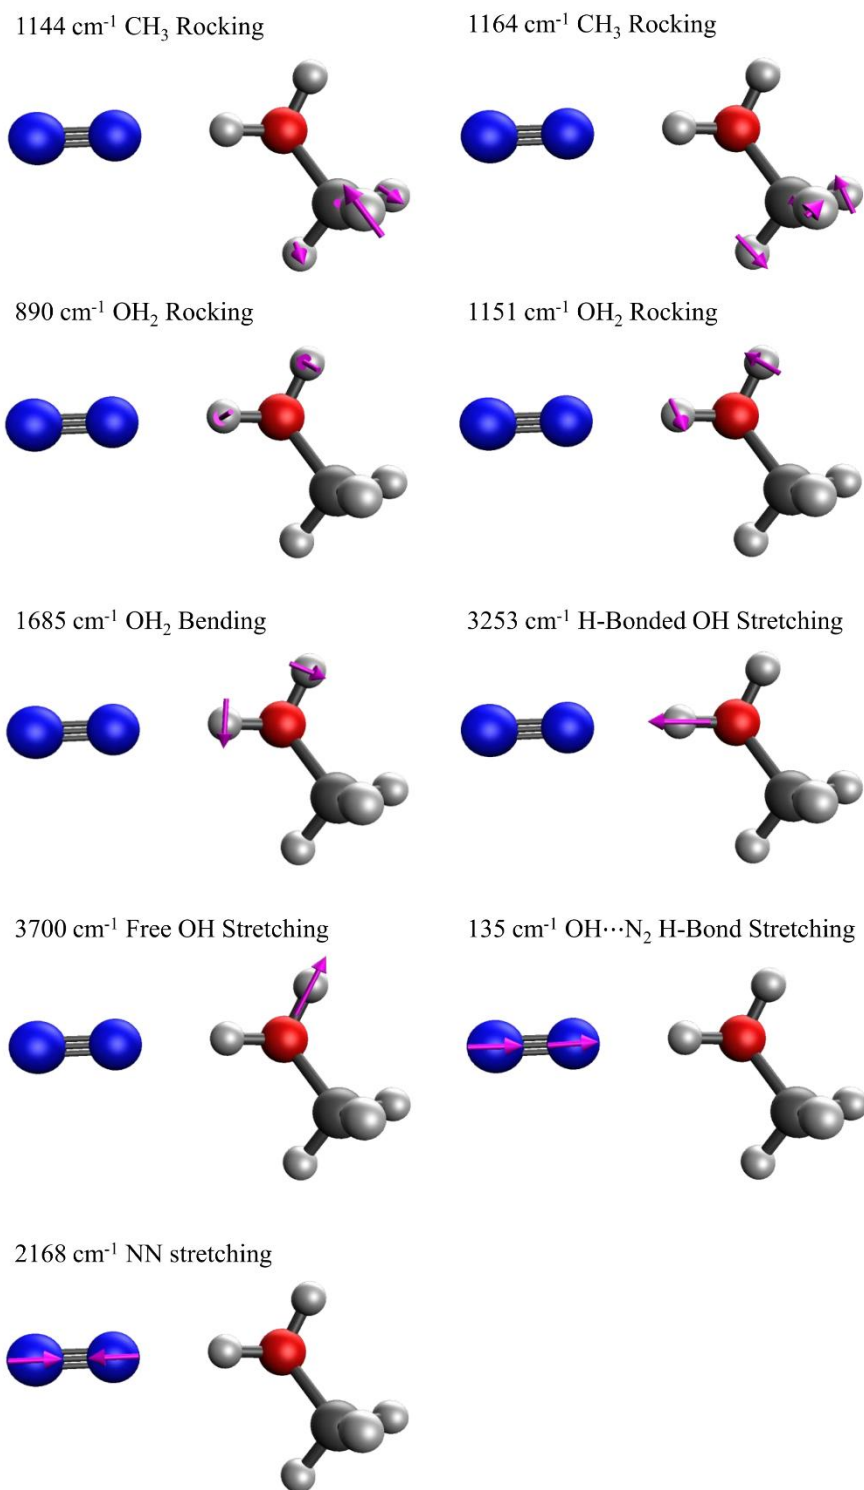

**Figure S1.** Selected Localized Normal Modes of  $\text{MeOH}_2^+\cdots\text{N}_2$  Used in DVR-FBR Calculations.

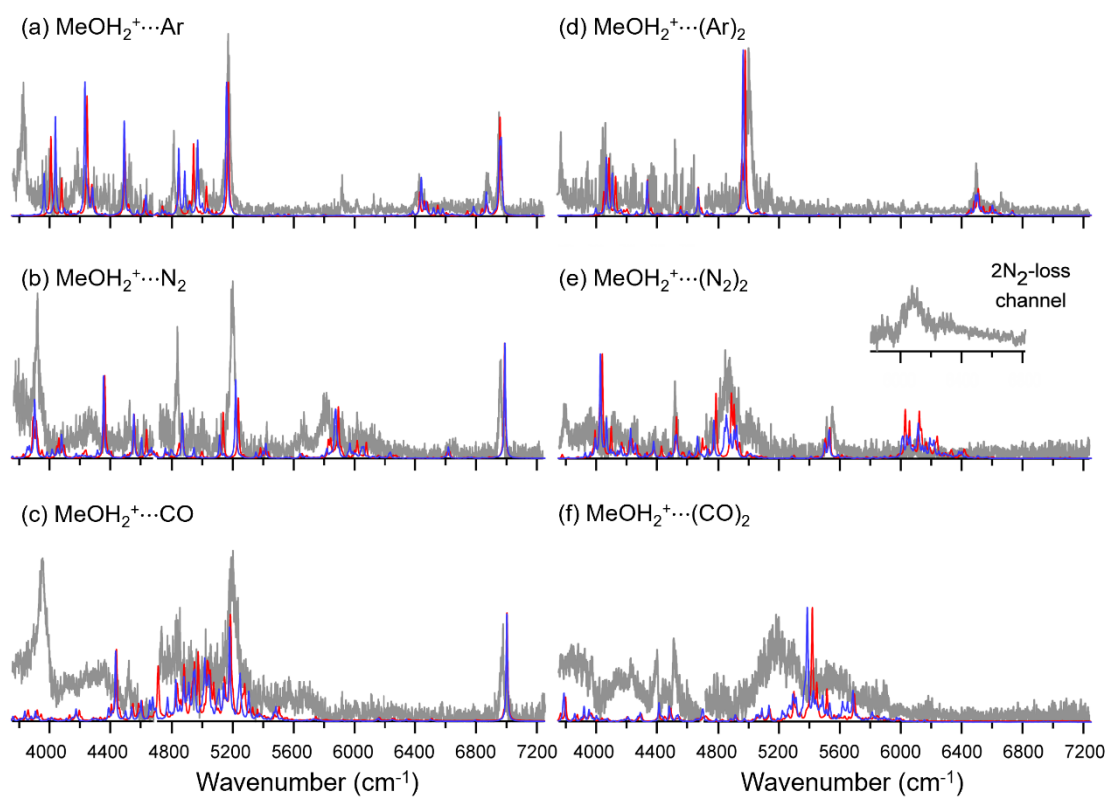

**Figure S2.** Convergence Test for the DVR–FBR Calculation.

The experimental spectrum is shown in gray, and the DVR–FBR simulations with  $Q_{\max} = 7$  (red) and  $Q_{\max} = 8$  (blue) overlap closely, indicating the convergence of  $Q_{\max}$ .

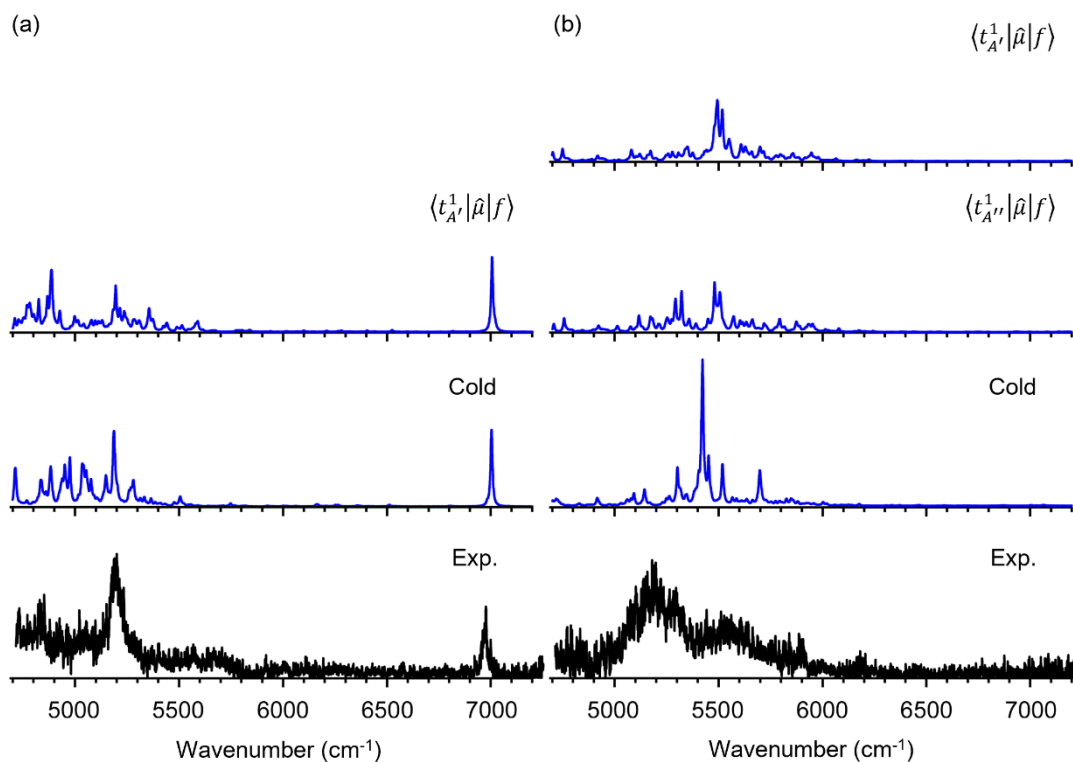

**Figure S3.** Hot Band Simulation of (a) MeOH<sub>2</sub><sup>+</sup>...CO, (b) MeOH<sub>2</sub><sup>+</sup>...(CO)<sub>2</sub>, in the NIR Region.

The bottom black curves are the experimentally observed NIR spectra, and the blue curves right above the observed spectra are the calculated "cold" spectra, which are identical to the simulated spectra used in **Figures 1** and **2** of the main text. The remaining blue curves above the cold spectra are the "hot band" spectra reproduced by initiating transitions from the first excited level of the H-bond stretching modes,  $|t_{A'}^1\rangle$  and/or  $|t_{A''}^1\rangle$ . In the case of MeOH<sub>2</sub><sup>+</sup>...CO (**Figure S1a**), hot bands did not significantly deform the general profile of the spectrum; while the  $\langle t_{A'}^1 | \mu | f \rangle$  and  $\langle t_{A''}^1 | \mu | f \rangle$  transitions for MeOH<sub>2</sub><sup>+</sup>...CO<sub>2</sub> in **Figure S1b** introduced additional bands around 5300 and 5500 cm<sup>-1</sup>.

**Table S1.** Cartesian Coordinates of  $\text{MeOH}_2^+\cdots\text{X}_n$  ( $\text{X} = \text{Ar}, \text{N}_2, \text{and CO}; n = 1 \text{ and } 2$ )

Optimized at MP2/aug-cc-pVDZ.

$\text{MeOH}_2^+\cdots\text{Ar}$

|    |           |           |           |
|----|-----------|-----------|-----------|
| C  | 2.142147  | -0.570573 | 0.025803  |
| H  | 1.790537  | -1.213800 | -0.785676 |
| H  | 1.973739  | -0.993493 | 1.021302  |
| H  | 3.168536  | -0.229835 | -0.135683 |
| O  | 1.300491  | 0.688638  | -0.109109 |
| H  | 0.333773  | 0.507248  | -0.033475 |
| H  | 1.541872  | 1.379557  | 0.540533  |
| Ar | -1.781404 | -0.085297 | 0.006170  |

$\text{MeOH}_2^+\cdots\text{Ar}_2$

|    |           |           |           |
|----|-----------|-----------|-----------|
| C  | -0.978312 | 1.891295  | 0.000000  |
| H  | -0.849498 | 2.489746  | 0.906090  |
| H  | -1.898448 | 1.297990  | 0.000000  |
| H  | -0.849498 | 2.489746  | -0.906090 |
| O  | 0.204857  | 0.945147  | 0.000000  |
| H  | 0.226806  | 0.372705  | 0.801232  |
| H  | 0.226806  | 0.372705  | -0.801232 |
| Ar | 0.204857  | -0.720329 | 2.727321  |
| Ar | 0.204857  | -0.720329 | -2.727321 |

MeOH<sub>2</sub><sup>+</sup>...N<sub>2</sub>

|   |           |           |           |
|---|-----------|-----------|-----------|
| C | 2.022606  | -0.569685 | 0.026212  |
| H | 1.669109  | -1.242981 | -0.759693 |
| H | 1.896730  | -0.979105 | 1.033756  |
| H | 3.037262  | -0.212855 | -0.171053 |
| O | 1.147405  | 0.657064  | -0.110458 |
| H | 0.174846  | 0.451218  | -0.013949 |
| H | 1.391649  | 1.365814  | 0.516686  |
| N | -1.553436 | 0.030494  | 0.016386  |
| N | -2.658632 | -0.204851 | 0.000850  |

MeOH<sub>2</sub><sup>+</sup>...(N<sub>2</sub>)<sub>2</sub>

|   |           |           |           |
|---|-----------|-----------|-----------|
| C | -0.667982 | 1.975954  | -0.000000 |
| H | -0.432051 | 2.544693  | 0.903791  |
| H | -1.689823 | 1.581882  | -0.000000 |
| H | -0.432051 | 2.544693  | -0.903791 |
| O | 0.298968  | 0.825287  | -0.000000 |
| H | 0.215361  | 0.262464  | 0.814117  |
| H | 0.215361  | 0.262464  | -0.814117 |
| N | 0.133548  | -0.636482 | -2.391504 |
| N | 0.133548  | -0.636482 | 2.391504  |
| N | 0.133548  | -1.195962 | 3.373486  |
| N | 0.133548  | -1.195962 | -3.373486 |

MeOH<sub>2</sub><sup>+</sup>...CO

|   |           |           |           |
|---|-----------|-----------|-----------|
| C | 2.069077  | -0.564008 | 0.026554  |
| H | 1.720539  | -1.244450 | -0.755550 |
| H | 1.951909  | -0.976187 | 1.034240  |
| H | 3.083512  | -0.208047 | -0.173966 |
| O | 1.189367  | 0.651219  | -0.109553 |
| H | 0.197279  | 0.437211  | -0.016781 |
| H | 1.432879  | 1.358817  | 0.518213  |
| C | -1.526116 | 0.045422  | 0.012599  |
| O | -2.644852 | -0.183198 | 0.004419  |

MeOH<sub>2</sub><sup>+</sup>...(CO)<sub>2</sub>

|   |           |           |           |
|---|-----------|-----------|-----------|
| C | -0.677845 | 2.007044  | -0.000000 |
| H | -0.450811 | 2.582803  | 0.901899  |
| H | -1.700829 | 1.614922  | -0.000000 |
| H | -0.450811 | 2.582803  | -0.901899 |
| O | 0.288447  | 0.868148  | -0.000000 |
| H | 0.207819  | 0.302199  | 0.827894  |
| H | 0.207819  | 0.302199  | -0.827894 |
| C | 0.140940  | -0.614947 | 2.414226  |
| O | 0.140940  | -1.187063 | 3.403549  |
| C | 0.140940  | -0.614947 | -2.414226 |
| O | 0.140940  | -1.187063 | -3.403549 |

**Table S2.** Selected Localized Normal Modes Frequencies and Intensities of MeOH<sub>2</sub><sup>+</sup>⋯X<sub>n</sub> (X = Ar, N<sub>2</sub>, and CO; n = 1 and 2) Evaluated at MP2/aug-cc-pVDZ.

The following tables list the frequencies and intensities of the selected localized normal modes used in this research. The CH<sub>3</sub> stretching/bending, despite not being included in the analysis, are also listed here in gray text.

MeOH<sub>2</sub><sup>+</sup>⋯Ar

| Freq. (cm <sup>-1</sup> ) | Intensity (km/mol) | Assignment                                |
|---------------------------|--------------------|-------------------------------------------|
| 1143                      | 1.16               | CH <sub>3</sub> Rocking                   |
| 1163                      | 0.36               | CH <sub>3</sub> Rocking                   |
| 1451                      | 1.12               | CH <sub>3</sub> Umbrella Bending          |
| 1477                      | 17.20              | CH <sub>3</sub> Anti-symmetric Bending    |
| 1479                      | 15.45              | CH <sub>3</sub> Anti-symmetric Bending    |
| 3131                      | 0.43               | CH <sub>3</sub> Symmetric Stretching      |
| 3276                      | 3.25               | CH <sub>3</sub> Anti-symmetric Stretching |
| 3282                      | 5.27               | CH <sub>3</sub> Anti-symmetric Stretching |
| 816                       | 192.22             | OH <sub>2</sub> Rocking                   |
| 1092                      | 3.10               | OH <sub>2</sub> Rocking                   |
| 1666                      | 67.79              | OH <sub>2</sub> Bending                   |
| 3502                      | 717.07             | Hydrogen-Bonded OH Stretching             |
| 3694                      | 352.24             | Free OH Stretching                        |
| 75                        | 0.95               | OH⋯Ar Hydrogen-Bond Stretching            |

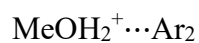

| Freq. (cm <sup>-1</sup> ) | Intensity (km/mol) | Assignment                                |
|---------------------------|--------------------|-------------------------------------------|
| 1144                      | 1.17               | CH <sub>3</sub> Rocking                   |
| 1163                      | 0.13               | CH <sub>3</sub> Rocking                   |
| 1451                      | 0.71               | CH <sub>3</sub> Umbrella Bending          |
| 1478                      | 18.16              | CH <sub>3</sub> Anti-symmetric Bending    |
| 1480                      | 14.98              | CH <sub>3</sub> Anti-symmetric Bending    |
| 3129                      | 0.46               | CH <sub>3</sub> Symmetric Stretching      |
| 3272                      | 2.34               | CH <sub>3</sub> Anti-symmetric Stretching |
| 3279                      | 4.06               | CH <sub>3</sub> Anti-symmetric Stretching |
| 848                       | 153.16             | OH <sub>2</sub> Rocking                   |
| 1122                      | 1.31               | OH <sub>2</sub> Rocking                   |
| 1665                      | 40.60              | OH <sub>2</sub> Bending                   |
| 3502                      | 468.76             | OH <sub>2</sub> Symmetric Stretching      |
| 3576                      | 1092.10            | OH <sub>2</sub> Anti-symmetric Stretching |
| 72                        | 1.31               | OH $\cdots$ Ar Hydrogen-Bond Stretching   |
| 74                        | 0.48               | OH $\cdots$ Ar Hydrogen-Bond Stretching   |

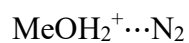

| Freq. (cm <sup>-1</sup> ) | Intensity (km/mol) | Assignment                                          |
|---------------------------|--------------------|-----------------------------------------------------|
| 1144                      | 1.10               | CH <sub>3</sub> Rocking                             |
| 1164                      | 0.26               | CH <sub>3</sub> Rocking                             |
| 1452                      | 1.33               | CH <sub>3</sub> Umbrella Bending                    |
| 1479                      | 16.54              | CH <sub>3</sub> Anti-symmetric Bending              |
| 1481                      | 14.91              | CH <sub>3</sub> Anti-symmetric Bending              |
| 3130                      | 0.57               | CH <sub>3</sub> Symmetric Stretching                |
| 3272                      | 2.16               | CH <sub>3</sub> Anti-symmetric Stretching           |
| 3279                      | 3.93               | CH <sub>3</sub> Anti-symmetric Stretching           |
| 890                       | 183.37             | OH <sub>2</sub> Rocking                             |
| 1151                      | 3.04               | OH <sub>2</sub> Rocking                             |
| 1685                      | 62.58              | OH <sub>2</sub> Bending                             |
| 3253                      | 1388.24            | Hydrogen-Bonded OH Stretching                       |
| 3700                      | 279.68             | Free OH Stretching                                  |
| 135                       | 3.34               | OH $\cdots$ N <sub>2</sub> Hydrogen-Bond Stretching |
| 2168                      | 18.78              | NN stretching                                       |

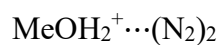

| Freq. (cm <sup>-1</sup> ) | Intensity (km/mol) | Assignment                                          |
|---------------------------|--------------------|-----------------------------------------------------|
| 1146                      | 1.13               | CH <sub>3</sub> Rocking                             |
| 1164                      | 0.02               | CH <sub>3</sub> Rocking                             |
| 1453                      | 0.98               | CH <sub>3</sub> Umbrella Bending                    |
| 1482                      | 16.97              | CH <sub>3</sub> Anti-symmetric Bending              |
| 1484                      | 13.98              | CH <sub>3</sub> Anti-symmetric Bending              |
| 3127                      | 0.94               | CH <sub>3</sub> Symmetric Stretching                |
| 3264                      | 0.92               | CH <sub>3</sub> Anti-symmetric Stretching           |
| 3273                      | 2.08               | CH <sub>3</sub> Anti-symmetric Stretching           |
| 949                       | 159.75             | OH <sub>2</sub> Rocking                             |
| 1218                      | 0.00               | OH <sub>2</sub> Rocking                             |
| 1693                      | 35.32              | OH <sub>2</sub> Bending                             |
| 3332                      | 759.33             | OH <sub>2</sub> Symmetric Stretching                |
| 3373                      | 1780.91            | OH <sub>2</sub> Anti-symmetric Stretching           |
| 123                       | 4.22               | OH $\cdots$ N <sub>2</sub> Hydrogen-Bond Stretching |
| 130                       | 1.69               | OH $\cdots$ N <sub>2</sub> Hydrogen-Bond Stretching |
| 2167                      | 24.18              | NN stretching                                       |
| 2167                      | 8.23               | NN stretching                                       |

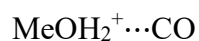

| Freq. (cm <sup>-1</sup> ) | Intensity (km/mol) | Assignment                                |
|---------------------------|--------------------|-------------------------------------------|
| 1145                      | 0.99               | CH <sub>3</sub> Rocking                   |
| 1164                      | 0.21               | CH <sub>3</sub> Rocking                   |
| 1452                      | 1.60               | CH <sub>3</sub> Umbrella Bending          |
| 1481                      | 16.05              | CH <sub>3</sub> Anti-symmetric Bending    |
| 1483                      | 14.34              | CH <sub>3</sub> Anti-symmetric Bending    |
| 3128                      | 0.80               | CH <sub>3</sub> Symmetric Stretching      |
| 3267                      | 1.36               | CH <sub>3</sub> Anti-symmetric Stretching |
| 3275                      | 2.92               | CH <sub>3</sub> Anti-symmetric Stretching |
| 955                       | 138.20             | OH <sub>2</sub> Rocking                   |
| 1193                      | 3.95               | OH <sub>2</sub> Rocking                   |
| 1687                      | 38.02              | OH <sub>2</sub> Bending                   |
| 2859                      | 2109.46            | Hydrogen-Bonded OH Stretching             |
| 3705                      | 245.02             | Free OH Stretching                        |
| 159                       | 3.40               | OH $\cdots$ CO Hydrogen-Bond Stretching   |
| 2137                      | 0.99               | CO stretching                             |

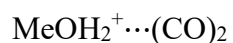

| Freq. (cm <sup>-1</sup> ) | Intensity (km/mol) | Assignment                                |
|---------------------------|--------------------|-------------------------------------------|
| 1147                      | 1.05               | CH <sub>3</sub> Rocking                   |
| 1163                      | 0.02               | CH <sub>3</sub> Rocking                   |
| 1453                      | 0.97               | CH <sub>3</sub> Umbrella Bending          |
| 1484                      | 16.76              | CH <sub>3</sub> Anti-symmetric Bending    |
| 1487                      | 12.57              | CH <sub>3</sub> Anti-symmetric Bending    |
| 3124                      | 1.64               | CH <sub>3</sub> Symmetric Stretching      |
| 3257                      | 0.26               | CH <sub>3</sub> Anti-symmetric Stretching |
| 3267                      | 1.00               | CH <sub>3</sub> Anti-symmetric Stretching |
| 1018                      | 113.13             | OH <sub>2</sub> Rocking                   |
| 1280                      | 1.49               | OH <sub>2</sub> Rocking                   |
| 1694                      | 11.84              | OH <sub>2</sub> Bending                   |
| 3086                      | 1000.33            | OH <sub>2</sub> Symmetric Stretching      |
| 3090                      | 2504.21            | OH <sub>2</sub> Anti-symmetric Stretching |
| 143                       | 2.87               | OH $\cdots$ CO Hydrogen-Bond Stretching   |
| 143                       | 2.87               | OH $\cdots$ CO Hydrogen-Bond Stretching   |
| 2128                      | 2.74               | CO stretching                             |
| 2128                      | 2.74               | CO stretching                             |

### Table S3. Assignment and Projection of the Pronounced Peaks

Here we listed all of the calculated transitions in the region of  $4000\text{ cm}^{-1}$  -  $7000\text{ cm}^{-1}$  whose IR intensity is larger than  $0.05\text{ km/mol}$ . The *transition energy* ( $\omega$ , in  $\text{cm}^{-1}$ ), the *IR intensity* ( $I$ , in  $\text{km/mol}$ ), and the *components of the transition dipole* ( $\mu_x$ ,  $\mu_y$  and  $\mu_z$ , in D) are listed in the following tables. In order to make reasonable assignments for these transitions, for each eigenstate  $\psi_a$ , we also listed a few of large components whose contribution exceeds 5%; in some cases that all projection are less than 5%, then only the largest one will be shown here.

To analyze the actual source of the transitions, we can decompose the transition dipole moment  $\mu^{g \rightarrow f}$  between ground state  $\langle g|$  and final state  $|f\rangle$  into contribution from its components:

$$\mu^{g \rightarrow f} = \langle g| \hat{\mu} |f\rangle = \sum_i c_n \langle g| \hat{\mu} |n\rangle = \sum_i \mu^{g \rightarrow n}$$

in which  $\mu^{g \rightarrow n}$  represents the contribution of FBR basis function  $|n\rangle$  to the total transition dipole moment  $\mu^{g \rightarrow f}$ . For each eigenstate, we also listed the *contribution of the FBR components to the total transition moment*, ( $\mu_x^{g \rightarrow n}$ ,  $\mu_y^{g \rightarrow n}$  and  $\mu_z^{g \rightarrow n}$ ), in D); we list the first three with largest norm of its transition dipole components (though some of them have small  $|c_n|^2$ ).

The finite-basis representation (FBR) employed in this work is constructed as a direct product of eigenfunctions of one-dimensional single-mode DVR Hamiltonians,  $|n\rangle = \prod_i \phi_{n_i}(q_i)$ , where  $n_i$  denotes the vibrational quantum number of mode  $i$ . For the purpose of spectral assignment and presentation in the assignment tables, certain groups of vibrational modes were collectively treated in the assignment tables. In particular, the four  $\text{CH}_3/\text{OH}_2$  rocking modes ( $R$ ) exhibit similar frequencies and play a secondary role in the spectral interpretation presented here; to simplify the assignment tables, the individual quantum numbers of these rocking modes were combined into a single total quanta of rocking modes. For example, basis states  $|R_{\text{CH}_3}^0, R_{\text{CH}_3}^0, R_{\text{OH}_2}^3, R_{\text{OH}_2}^1, \dots\rangle$  and  $|R_{\text{CH}_3}^2, R_{\text{CH}_3}^1, R_{\text{OH}_2}^1, R_{\text{OH}_2}^0, \dots\rangle$  within the rocking-mode subspace are treated as  $|R^4, \dots\rangle$ ; correspondingly, the squared projection coefficients  $|c_n|^2$  and the contributions to the transition dipole moment,  $\mu^{g \rightarrow n}$ , of all basis functions sharing the same total rocking-mode quanta were summed when constructing the assignment tables. Analogous grouping procedures were applied to the H-bond stretching modes ( $t$ ) and the  $\text{N}\equiv\text{N}$  or  $\text{C}\equiv\text{O}$  stretching modes ( $s_X$ ). This grouping is applied only for clarity in data presentation and does not affect the vibrational eigenstates or transition intensities.

| $\omega$ | $I$   | $\mu_x$ | $\mu_y$ | $\mu_z$ | Assignment                                                                | $ c_n ^2$ | $\mu_x^{g \rightarrow n}$ | $\mu_y^{g \rightarrow n}$ | $\mu_z^{g \rightarrow n}$ |
|----------|-------|---------|---------|---------|---------------------------------------------------------------------------|-----------|---------------------------|---------------------------|---------------------------|
| 4008.9   | 1.522 | -0.010  | 0.003   | -0.006  | $\langle 282   R^1, b^0, s_{\text{HB}}^1, s_{\text{free}}^0, t^0 \rangle$ | 45.64%    | -0.007                    | -0.015                    | 0.023                     |
|          |       |         |         |         | $\langle 282   R^1, b^2, s_{\text{HB}}^0, s_{\text{free}}^0, t^0 \rangle$ | 7.00%     | 0.000                     | 0.000                     | 0.000                     |
|          |       |         |         |         | $\langle 282   R^3, b^1, s_{\text{HB}}^0, s_{\text{free}}^0, t^0 \rangle$ | 6.64%     | 0.000                     | 0.002                     | -0.004                    |
|          |       |         |         |         | $\langle 282   R^1, b^0, s_{\text{HB}}^0, s_{\text{free}}^0, t^0 \rangle$ | 0.52%     | -0.002                    | 0.015                     | -0.020                    |
|          |       |         |         |         | $\langle 282   R^0, b^0, s_{\text{HB}}^1, s_{\text{free}}^0, t^0 \rangle$ | 0.20%     | 0.014                     | 0.000                     | -0.002                    |
| 4013.2   | 0.099 | 0.003   | -0.001  | 0.001   | $\langle 283   R^4, b^0, s_{\text{HB}}^0, s_{\text{free}}^0, t^0 \rangle$ | 40.16%    | 0.000                     | 0.000                     | 0.000                     |
|          |       |         |         |         | $\langle 283   R^2, b^1, s_{\text{HB}}^0, s_{\text{free}}^0, t^0 \rangle$ | 11.79%    | 0.000                     | 0.000                     | 0.000                     |
|          |       |         |         |         | $\langle 283   R^1, b^0, s_{\text{HB}}^1, s_{\text{free}}^0, t^0 \rangle$ | 2.58%     | 0.002                     | 0.004                     | -0.005                    |
|          |       |         |         |         | $\langle 283   R^1, b^0, s_{\text{HB}}^0, s_{\text{free}}^0, t^0 \rangle$ | 0.03%     | 0.001                     | -0.004                    | 0.005                     |
|          |       |         |         |         | $\langle 283   R^0, b^0, s_{\text{HB}}^1, s_{\text{free}}^0, t^0 \rangle$ | 0.01%     | -0.004                    | 0.000                     | 0.000                     |
| 4020.8   | 0.103 | 0.003   | -0.000  | 0.001   | $\langle 284   R^3, b^1, s_{\text{HB}}^0, s_{\text{free}}^0, t^0 \rangle$ | 31.64%    | 0.000                     | 0.000                     | 0.000                     |
|          |       |         |         |         | $\langle 284   R^1, b^2, s_{\text{HB}}^0, s_{\text{free}}^0, t^0 \rangle$ | 12.67%    | 0.000                     | 0.000                     | 0.000                     |
|          |       |         |         |         | $\langle 284   R^4, b^0, s_{\text{HB}}^0, s_{\text{free}}^0, t^0 \rangle$ | 5.59%     | 0.000                     | 0.000                     | 0.000                     |
|          |       |         |         |         | $\langle 284   R^1, b^0, s_{\text{HB}}^1, s_{\text{free}}^0, t^0 \rangle$ | 1.37%     | 0.001                     | 0.003                     | -0.004                    |
|          |       |         |         |         | $\langle 284   R^0, b^0, s_{\text{HB}}^1, s_{\text{free}}^0, t^0 \rangle$ | 0.01%     | -0.004                    | 0.000                     | 0.000                     |
|          |       |         |         |         | $\langle 284   R^1, b^0, s_{\text{HB}}^0, s_{\text{free}}^0, t^0 \rangle$ | 0.01%     | 0.000                     | -0.002                    | 0.003                     |
| 4079.6   | 0.746 | 0.008   | 0.000   | 0.003   | $\langle 298   R^1, b^2, s_{\text{HB}}^0, s_{\text{free}}^0, t^0 \rangle$ | 27.87%    | -0.001                    | -0.001                    | 0.004                     |
|          |       |         |         |         | $\langle 298   R^1, b^0, s_{\text{HB}}^1, s_{\text{free}}^0, t^0 \rangle$ | 14.87%    | 0.004                     | 0.009                     | -0.013                    |
|          |       |         |         |         | $\langle 298   R^3, b^1, s_{\text{HB}}^0, s_{\text{free}}^0, t^0 \rangle$ | 10.04%    | 0.000                     | 0.003                     | -0.005                    |
|          |       |         |         |         | $\langle 298   R^1, b^0, s_{\text{HB}}^0, s_{\text{free}}^1, t^0 \rangle$ | 5.35%     | 0.003                     | -0.002                    | 0.008                     |
|          |       |         |         |         | $\langle 298   R^3, b^0, s_{\text{HB}}^0, s_{\text{free}}^0, t^0 \rangle$ | 3.29%     | 0.001                     | -0.006                    | 0.008                     |
| 4139.4   | 0.090 | -0.002  | 0.001   | -0.002  | $\langle 311   R^1, b^0, s_{\text{HB}}^1, s_{\text{free}}^0, t^1 \rangle$ | 52.01%    | -0.006                    | -0.001                    | 0.000                     |
|          |       |         |         |         | $\langle 311   R^1, b^0, s_{\text{HB}}^1, s_{\text{free}}^0, t^2 \rangle$ | 7.11%     | 0.000                     | 0.000                     | 0.000                     |
|          |       |         |         |         | $\langle 311   R^1, b^0, s_{\text{HB}}^1, s_{\text{free}}^0, t^0 \rangle$ | 4.01%     | -0.002                    | -0.005                    | 0.007                     |
|          |       |         |         |         | $\langle 311   R^1, b^0, s_{\text{HB}}^0, s_{\text{free}}^0, t^0 \rangle$ | 0.04%     | -0.001                    | 0.004                     | -0.006                    |
| 4188.1   | 0.065 | -0.001  | -0.002  | -0.000  | $\langle 320   R^1, b^2, s_{\text{HB}}^0, s_{\text{free}}^0, t^0 \rangle$ | 26.04%    | 0.001                     | 0.001                     | 0.000                     |
|          |       |         |         |         | $\langle 320   R^1, b^2, s_{\text{HB}}^0, s_{\text{free}}^0, t^1 \rangle$ | 12.62%    | 0.000                     | 0.000                     | 0.000                     |
|          |       |         |         |         | $\langle 320   R^3, b^1, s_{\text{HB}}^0, s_{\text{free}}^0, t^1 \rangle$ | 6.93%     | 0.000                     | 0.000                     | 0.000                     |
|          |       |         |         |         | $\langle 320   R^1, b^0, s_{\text{HB}}^1, s_{\text{free}}^0, t^0 \rangle$ | 6.22%     | 0.002                     | 0.001                     | -0.001                    |
|          |       |         |         |         | $\langle 320   R^0, b^1, s_{\text{HB}}^0, s_{\text{free}}^1, t^0 \rangle$ | 0.65%     | 0.000                     | -0.001                    | -0.001                    |
|          |       |         |         |         | $\langle 320   R^0, b^0, s_{\text{HB}}^0, s_{\text{free}}^1, t^0 \rangle$ | 0.01%     | -0.001                    | -0.001                    | -0.001                    |
| 4246.1   | 2.374 | 0.001   | 0.015   | -0.002  | $\langle 329   R^1, b^0, s_{\text{HB}}^0, s_{\text{free}}^1, t^0 \rangle$ | 69.57%    | 0.011                     | -0.006                    | 0.028                     |
|          |       |         |         |         | $\langle 329   R^1, b^0, s_{\text{HB}}^0, s_{\text{free}}^0, t^0 \rangle$ | 1.26%     | -0.004                    | 0.024                     | -0.031                    |
|          |       |         |         |         | $\langle 329   R^0, b^0, s_{\text{HB}}^0, s_{\text{free}}^1, t^0 \rangle$ | 0.21%     | -0.006                    | -0.007                    | -0.005                    |
| 4256.3   | 0.089 | 0.001   | -0.003  | 0.001   | $\langle 332   R^4, b^0, s_{\text{HB}}^0, s_{\text{free}}^0, t^0 \rangle$ | 58.91%    | 0.000                     | 0.000                     | 0.000                     |
|          |       |         |         |         | $\langle 332   R^1, b^0, s_{\text{HB}}^1, s_{\text{free}}^0, t^0 \rangle$ | 2.29%     | 0.001                     | 0.000                     | 0.000                     |
|          |       |         |         |         | $\langle 332   R^1, b^0, s_{\text{HB}}^0, s_{\text{free}}^1, t^0 \rangle$ | 0.32%     | -0.001                    | 0.000                     | -0.002                    |

|        |       |        |        |        |                                                                         |        |        |        |        |
|--------|-------|--------|--------|--------|-------------------------------------------------------------------------|--------|--------|--------|--------|
|        |       |        |        |        | $\langle 332 R^1, b^0, s_{\text{HB}}^0, s_{\text{free}}^0, t^0 \rangle$ | 0.03%  | 0.001  | -0.004 | 0.005  |
| 4277.6 | 0.456 | -0.003 | 0.005  | -0.001 | $\langle 338 R^1, b^0, s_{\text{HB}}^1, s_{\text{free}}^0, t^0 \rangle$ | 50.05% | -0.004 | -0.002 | 0.002  |
|        |       |        |        |        | $\langle 338 R^1, b^2, s_{\text{HB}}^0, s_{\text{free}}^0, t^0 \rangle$ | 5.03%  | 0.000  | 0.000  | 0.000  |
|        |       |        |        |        | $\langle 338 R^1, b^0, s_{\text{HB}}^0, s_{\text{free}}^0, t^0 \rangle$ | 0.03%  | -0.001 | 0.003  | -0.005 |
|        |       |        |        |        | $\langle 338 R^0, b^0, s_{\text{HB}}^1, s_{\text{free}}^0, t^0 \rangle$ | 0.01%  | 0.003  | 0.000  | 0.000  |
| 4278.4 | 0.067 | 0.001  | -0.002 | 0.001  | $\langle 339 R^1, b^0, s_{\text{HB}}^1, s_{\text{free}}^0, t^2 \rangle$ | 29.45% | -0.001 | 0.000  | 0.000  |
|        |       |        |        |        | $\langle 339 R^3, b^1, s_{\text{HB}}^0, s_{\text{free}}^0, t^1 \rangle$ | 10.76% | 0.001  | 0.000  | 0.000  |
|        |       |        |        |        | $\langle 339 R^1, b^2, s_{\text{HB}}^0, s_{\text{free}}^0, t^1 \rangle$ | 7.95%  | 0.000  | 0.000  | 0.000  |
|        |       |        |        |        | $\langle 339 R^1, b^0, s_{\text{HB}}^1, s_{\text{free}}^0, t^1 \rangle$ | 4.63%  | 0.002  | 0.000  | 0.000  |
|        |       |        |        |        | $\langle 339 R^1, b^0, s_{\text{HB}}^1, s_{\text{free}}^0, t^0 \rangle$ | 2.76%  | 0.002  | 0.000  | 0.000  |
|        |       |        |        |        | $\langle 339 R^1, b^0, s_{\text{HB}}^0, s_{\text{free}}^0, t^0 \rangle$ | 0.01%  | 0.000  | -0.002 | 0.003  |
| 4281.8 | 0.060 | 0.000  | 0.002  | -0.000 | $\langle 342 R^3, b^1, s_{\text{HB}}^0, s_{\text{free}}^0, t^0 \rangle$ | 50.27% | 0.000  | 0.000  | 0.000  |
|        |       |        |        |        | $\langle 342 R^1, b^1, s_{\text{HB}}^0, s_{\text{free}}^0, t^0 \rangle$ | 0.80%  | 0.000  | -0.001 | 0.002  |
|        |       |        |        |        | $\langle 342 R^1, b^0, s_{\text{HB}}^0, s_{\text{free}}^1, t^0 \rangle$ | 0.77%  | 0.001  | -0.001 | 0.003  |
|        |       |        |        |        | $\langle 342 R^1, b^0, s_{\text{HB}}^0, s_{\text{free}}^0, t^0 \rangle$ | 0.05%  | -0.001 | 0.005  | -0.006 |
| 4300.3 | 0.140 | 0.002  | -0.003 | 0.000  | $\langle 347 R^5, b^0, s_{\text{HB}}^0, s_{\text{free}}^0, t^0 \rangle$ | 26.07% | 0.000  | 0.004  | -0.006 |
|        |       |        |        |        | $\langle 347 R^3, b^1, s_{\text{HB}}^0, s_{\text{free}}^0, t^0 \rangle$ | 18.59% | 0.000  | -0.003 | 0.005  |
|        |       |        |        |        | $\langle 347 R^4, b^0, s_{\text{HB}}^0, s_{\text{free}}^0, t^0 \rangle$ | 8.44%  | 0.000  | -0.002 | 0.004  |
|        |       |        |        |        | $\langle 347 R^3, b^0, s_{\text{HB}}^0, s_{\text{free}}^0, t^0 \rangle$ | 2.26%  | 0.001  | -0.005 | 0.006  |
| 4492.9 | 1.560 | 0.008  | -0.008 | 0.003  | $\langle 387 R^1, b^0, s_{\text{HB}}^0, s_{\text{free}}^1, t^0 \rangle$ | 82.68% | -0.001 | 0.000  | -0.004 |
|        |       |        |        |        | $\langle 387 R^1, b^0, s_{\text{HB}}^0, s_{\text{free}}^0, t^0 \rangle$ | 0.71%  | 0.005  | -0.004 | 0.007  |
| 4518.5 | 0.153 | -0.004 | 0.000  | -0.001 | $\langle 395 R^1, b^0, s_{\text{HB}}^1, s_{\text{free}}^0, t^0 \rangle$ | 57.89% | -0.002 | -0.001 | 0.003  |
|        |       |        |        |        | $\langle 395 R^1, b^0, s_{\text{HB}}^1, s_{\text{free}}^0, t^1 \rangle$ | 6.98%  | 0.000  | 0.000  | 0.000  |
|        |       |        |        |        | $\langle 395 R^1, b^2, s_{\text{HB}}^0, s_{\text{free}}^0, t^0 \rangle$ | 6.18%  | 0.000  | 0.000  | 0.000  |
|        |       |        |        |        | $\langle 395 R^1, b^0, s_{\text{HB}}^0, s_{\text{free}}^0, t^0 \rangle$ | 0.02%  | 0.000  | 0.003  | -0.004 |
|        |       |        |        |        | $\langle 395 R^0, b^0, s_{\text{HB}}^1, s_{\text{free}}^0, t^0 \rangle$ | 0.02%  | 0.004  | 0.000  | 0.000  |
| 4620.8 | 0.179 | -0.003 | 0.002  | -0.000 | $\langle 421 R^1, b^0, s_{\text{HB}}^1, s_{\text{free}}^0, t^0 \rangle$ | 25.29% | -0.004 | -0.001 | 0.001  |
|        |       |        |        |        | $\langle 421 R^2, b^2, s_{\text{HB}}^0, s_{\text{free}}^0, t^0 \rangle$ | 17.78% | -0.001 | 0.001  | 0.002  |
|        |       |        |        |        | $\langle 421 R^0, b^3, s_{\text{HB}}^0, s_{\text{free}}^0, t^0 \rangle$ | 8.06%  | -0.001 | 0.001  | 0.001  |
|        |       |        |        |        | $\langle 421 R^3, b^1, s_{\text{HB}}^0, s_{\text{free}}^0, t^0 \rangle$ | 4.80%  | 0.000  | 0.002  | -0.004 |
|        |       |        |        |        | $\langle 421 R^2, b^1, s_{\text{HB}}^0, s_{\text{free}}^0, t^0 \rangle$ | 1.92%  | 0.001  | 0.000  | -0.003 |
|        |       |        |        |        | $\langle 421 R^0, b^0, s_{\text{HB}}^1, s_{\text{free}}^0, t^0 \rangle$ | 0.05%  | 0.007  | 0.000  | -0.001 |
| 4622.3 | 0.126 | 0.002  | -0.003 | 0.000  | $\langle 422 R^1, b^0, s_{\text{HB}}^1, s_{\text{free}}^0, t^0 \rangle$ | 31.87% | 0.006  | 0.001  | -0.001 |
|        |       |        |        |        | $\langle 422 R^2, b^2, s_{\text{HB}}^0, s_{\text{free}}^0, t^0 \rangle$ | 12.85% | -0.001 | 0.001  | 0.002  |
|        |       |        |        |        | $\langle 422 R^0, b^3, s_{\text{HB}}^0, s_{\text{free}}^0, t^0 \rangle$ | 5.53%  | -0.001 | 0.001  | 0.001  |
|        |       |        |        |        | $\langle 422 R^3, b^1, s_{\text{HB}}^0, s_{\text{free}}^0, t^0 \rangle$ | 3.82%  | 0.000  | 0.002  | -0.003 |
|        |       |        |        |        | $\langle 422 R^0, b^1, s_{\text{HB}}^0, s_{\text{free}}^0, t^0 \rangle$ | 0.07%  | 0.002  | -0.002 | -0.002 |
|        |       |        |        |        | $\langle 422 R^1, b^0, s_{\text{HB}}^0, s_{\text{free}}^0, t^0 \rangle$ | 0.01%  | 0.000  | -0.003 | 0.003  |
| 4661.0 | 0.090 | -0.003 | 0.001  | -0.001 | $\langle 429 R^3, b^1, s_{\text{HB}}^0, s_{\text{free}}^0, t^0 \rangle$ | 23.28% | 0.000  | 0.000  | 0.000  |
|        |       |        |        |        | $\langle 429 R^5, b^0, s_{\text{HB}}^0, s_{\text{free}}^0, t^0 \rangle$ | 21.55% | 0.000  | 0.000  | 0.000  |
|        |       |        |        |        | $\langle 429 R^1, b^2, s_{\text{HB}}^0, s_{\text{free}}^0, t^0 \rangle$ | 21.29% | 0.000  | 0.000  | 0.000  |
|        |       |        |        |        | $\langle 429 R^2, b^0, s_{\text{HB}}^1, s_{\text{free}}^0, t^0 \rangle$ | 0.43%  | 0.001  | 0.001  | -0.002 |

|        |       |        |        |        |                                                                           |        |        |        |        |
|--------|-------|--------|--------|--------|---------------------------------------------------------------------------|--------|--------|--------|--------|
|        |       |        |        |        | $\langle 429   R^2, b^0, s_{\text{HB}}^0, s_{\text{free}}^1, t^0 \rangle$ | 0.28%  | 0.001  | 0.000  | 0.001  |
|        |       |        |        |        | $\langle 429   R^0, b^0, s_{\text{HB}}^0, s_{\text{free}}^1, t^0 \rangle$ | 0.01%  | -0.001 | -0.001 | -0.001 |
| 4740.2 | 0.125 | 0.001  | 0.003  | 0.001  | $\langle 454   R^1, b^0, s_{\text{HB}}^0, s_{\text{free}}^1, t^0 \rangle$ | 51.37% | 0.000  | 0.002  | 0.000  |
|        |       |        |        |        | $\langle 454   R^3, b^1, s_{\text{HB}}^0, s_{\text{free}}^0, t^0 \rangle$ | 18.18% | 0.000  | 0.000  | 0.000  |
|        |       |        |        |        | $\langle 454   R^2, b^0, s_{\text{HB}}^0, s_{\text{free}}^1, t^0 \rangle$ | 1.76%  | 0.002  | 0.001  | 0.003  |
|        |       |        |        |        | $\langle 454   R^0, b^0, s_{\text{HB}}^0, s_{\text{free}}^1, t^0 \rangle$ | 0.04%  | -0.003 | -0.003 | -0.002 |
|        |       |        |        |        | $\langle 454   R^0, b^0, s_{\text{HB}}^1, s_{\text{free}}^0, t^0 \rangle$ | 0.01%  | -0.003 | 0.000  | 0.000  |
| 4742.9 | 0.070 | 0.001  | 0.002  | 0.001  | $\langle 455   R^3, b^1, s_{\text{HB}}^0, s_{\text{free}}^0, t^0 \rangle$ | 30.43% | 0.000  | 0.000  | 0.000  |
|        |       |        |        |        | $\langle 455   R^1, b^0, s_{\text{HB}}^0, s_{\text{free}}^1, t^0 \rangle$ | 24.03% | 0.000  | 0.001  | 0.000  |
|        |       |        |        |        | $\langle 455   R^5, b^0, s_{\text{HB}}^0, s_{\text{free}}^0, t^0 \rangle$ | 5.21%  | 0.000  | 0.000  | 0.000  |
|        |       |        |        |        | $\langle 455   R^2, b^0, s_{\text{HB}}^1, s_{\text{free}}^0, t^0 \rangle$ | 1.03%  | 0.002  | 0.001  | -0.003 |
|        |       |        |        |        | $\langle 455   R^0, b^0, s_{\text{HB}}^1, s_{\text{free}}^0, t^0 \rangle$ | 0.02%  | -0.004 | 0.000  | 0.000  |
|        |       |        |        |        | $\langle 455   R^0, b^0, s_{\text{HB}}^0, s_{\text{free}}^1, t^0 \rangle$ | 0.02%  | -0.002 | -0.002 | -0.002 |
| 4830.7 | 0.085 | -0.002 | -0.002 | -0.001 | $\langle 476   R^0, b^3, s_{\text{HB}}^0, s_{\text{free}}^0, t^0 \rangle$ | 24.86% | -0.002 | 0.002  | 0.001  |
|        |       |        |        |        | $\langle 476   R^1, b^0, s_{\text{HB}}^0, s_{\text{free}}^1, t^1 \rangle$ | 23.76% | 0.000  | 0.000  | 0.000  |
|        |       |        |        |        | $\langle 476   R^2, b^0, s_{\text{HB}}^1, s_{\text{free}}^0, t^0 \rangle$ | 5.22%  | 0.003  | 0.003  | -0.006 |
|        |       |        |        |        | $\langle 476   R^0, b^0, s_{\text{HB}}^1, s_{\text{free}}^0, t^0 \rangle$ | 0.06%  | -0.008 | 0.000  | 0.001  |
|        |       |        |        |        | $\langle 476   R^0, b^0, s_{\text{HB}}^0, s_{\text{free}}^1, t^0 \rangle$ | 0.05%  | -0.003 | -0.003 | -0.002 |
| 4850.0 | 1.008 | -0.005 | 0.008  | -0.000 | $\langle 486   R^1, b^0, s_{\text{HB}}^0, s_{\text{free}}^1, t^0 \rangle$ | 81.54% | -0.002 | 0.004  | 0.003  |
|        |       |        |        |        | $\langle 486   R^1, b^0, s_{\text{HB}}^0, s_{\text{free}}^0, t^0 \rangle$ | 0.03%  | -0.001 | 0.004  | -0.005 |
| 4916.8 | 0.178 | -0.003 | -0.002 | -0.001 | $\langle 503   R^0, b^1, s_{\text{HB}}^1, s_{\text{free}}^0, t^1 \rangle$ | 17.35% | 0.000  | 0.000  | 0.000  |
|        |       |        |        |        | $\langle 503   R^2, b^0, s_{\text{HB}}^1, s_{\text{free}}^0, t^1 \rangle$ | 13.04% | 0.004  | 0.001  | 0.000  |
|        |       |        |        |        | $\langle 503   R^5, b^0, s_{\text{HB}}^0, s_{\text{free}}^0, t^1 \rangle$ | 7.43%  | 0.000  | 0.000  | 0.000  |
|        |       |        |        |        | $\langle 503   R^2, b^2, s_{\text{HB}}^0, s_{\text{free}}^0, t^1 \rangle$ | 5.95%  | 0.000  | 0.000  | 0.000  |
|        |       |        |        |        | $\langle 503   R^2, b^0, s_{\text{HB}}^1, s_{\text{free}}^0, t^0 \rangle$ | 1.82%  | 0.002  | 0.002  | -0.003 |
|        |       |        |        |        | $\langle 503   R^0, b^0, s_{\text{HB}}^1, s_{\text{free}}^0, t^0 \rangle$ | 0.02%  | -0.005 | 0.000  | 0.001  |
| 4922.0 | 0.120 | 0.002  | 0.002  | 0.001  | $\langle 505   R^5, b^0, s_{\text{HB}}^0, s_{\text{free}}^0, t^1 \rangle$ | 48.48% | 0.000  | 0.000  | 0.000  |
|        |       |        |        |        | $\langle 505   R^0, b^1, s_{\text{HB}}^1, s_{\text{free}}^0, t^1 \rangle$ | 6.90%  | 0.000  | 0.000  | 0.000  |
|        |       |        |        |        | $\langle 505   R^0, b^1, s_{\text{HB}}^1, s_{\text{free}}^0, t^0 \rangle$ | 2.41%  | 0.003  | 0.000  | -0.001 |
|        |       |        |        |        | $\langle 505   R^2, b^0, s_{\text{HB}}^1, s_{\text{free}}^0, t^0 \rangle$ | 0.67%  | -0.001 | -0.001 | 0.002  |
|        |       |        |        |        | $\langle 505   R^0, b^0, s_{\text{HB}}^1, s_{\text{free}}^0, t^0 \rangle$ | 0.01%  | 0.003  | 0.000  | 0.000  |
| 4944.9 | 1.431 | -0.008 | -0.007 | -0.003 | $\langle 513   R^0, b^1, s_{\text{HB}}^1, s_{\text{free}}^0, t^0 \rangle$ | 38.30% | -0.011 | -0.001 | 0.003  |
|        |       |        |        |        | $\langle 513   R^2, b^0, s_{\text{HB}}^1, s_{\text{free}}^0, t^1 \rangle$ | 10.34% | -0.003 | -0.001 | 0.000  |
|        |       |        |        |        | $\langle 513   R^4, b^1, s_{\text{HB}}^0, s_{\text{free}}^0, t^0 \rangle$ | 7.44%  | 0.000  | -0.001 | 0.002  |
|        |       |        |        |        | $\langle 513   R^2, b^0, s_{\text{HB}}^1, s_{\text{free}}^0, t^0 \rangle$ | 2.29%  | 0.002  | 0.002  | -0.004 |
|        |       |        |        |        | $\langle 513   R^0, b^0, s_{\text{HB}}^1, s_{\text{free}}^0, t^0 \rangle$ | 0.02%  | -0.004 | 0.000  | 0.000  |
| 4965.0 | 0.058 | -0.001 | -0.002 | -0.001 | $\langle 518   R^0, b^3, s_{\text{HB}}^0, s_{\text{free}}^0, t^2 \rangle$ | 29.98% | 0.000  | 0.000  | 0.000  |
|        |       |        |        |        | $\langle 518   R^0, b^1, s_{\text{HB}}^1, s_{\text{free}}^0, t^2 \rangle$ | 9.86%  | 0.000  | 0.000  | 0.000  |
|        |       |        |        |        | $\langle 518   R^2, b^2, s_{\text{HB}}^0, s_{\text{free}}^0, t^2 \rangle$ | 8.05%  | 0.000  | 0.000  | 0.000  |
|        |       |        |        |        | $\langle 518   R^5, b^0, s_{\text{HB}}^0, s_{\text{free}}^0, t^1 \rangle$ | 6.22%  | 0.000  | 0.000  | 0.000  |
|        |       |        |        |        | $\langle 518   R^2, b^0, s_{\text{HB}}^0, s_{\text{free}}^1, t^0 \rangle$ | 3.07%  | 0.002  | 0.001  | 0.004  |
|        |       |        |        |        | $\langle 518   R^0, b^1, s_{\text{HB}}^1, s_{\text{free}}^0, t^0 \rangle$ | 2.90%  | -0.003 | 0.000  | 0.001  |

|        |       |        |        |        |                                                                            |        |        |        |        |
|--------|-------|--------|--------|--------|----------------------------------------------------------------------------|--------|--------|--------|--------|
|        |       |        |        |        | $\langle 518   R^0, b^0, s_{\text{HB}}^0, s_{\text{free}}^1, t^0 \rangle$  | 0.06%  | -0.003 | -0.004 | -0.003 |
| 4988.6 | 0.055 | -0.001 | -0.001 | -0.001 | $\langle 526   R^0, b^3, s_{\text{HB}}^0, s_{\text{free}}^0, t^1 \rangle$  | 24.15% | 0.000  | 0.000  | 0.000  |
|        |       |        |        |        | $\langle 526   R^2, b^2, s_{\text{HB}}^0, s_{\text{free}}^0, t^1 \rangle$  | 14.20% | 0.000  | 0.000  | 0.000  |
|        |       |        |        |        | $\langle 526   R^0, b^1, s_{\text{HB}}^1, s_{\text{free}}^0, t^1 \rangle$  | 11.03% | 0.000  | 0.000  | 0.000  |
|        |       |        |        |        | $\langle 526   R^2, b^0, s_{\text{HB}}^1, s_{\text{free}}^0, t^1 \rangle$  | 6.67%  | 0.003  | 0.001  | 0.000  |
|        |       |        |        |        | $\langle 526   R^0, b^1, s_{\text{HB}}^1, s_{\text{free}}^0, t^0 \rangle$  | 2.02%  | -0.003 | 0.000  | 0.001  |
|        |       |        |        |        | $\langle 526   R^0, b^0, s_{\text{HB}}^1, s_{\text{free}}^0, t^0 \rangle$  | 0.01%  | -0.003 | 0.000  | 0.000  |
| 5029.6 | 0.571 | -0.005 | -0.004 | -0.002 | $\langle 538   R^2, b^2, s_{\text{HB}}^0, s_{\text{free}}^0, t^0 \rangle$  | 20.72% | -0.001 | 0.001  | 0.003  |
|        |       |        |        |        | $\langle 538   R^4, b^1, s_{\text{HB}}^0, s_{\text{free}}^0, t^0 \rangle$  | 17.02% | 0.000  | 0.001  | -0.003 |
|        |       |        |        |        | $\langle 538   R^0, b^3, s_{\text{HB}}^0, s_{\text{free}}^0, t^0 \rangle$  | 8.34%  | 0.000  | 0.000  | 0.000  |
|        |       |        |        |        | $\langle 538   R^0, b^1, s_{\text{HB}}^0, s_{\text{free}}^1, t^0 \rangle$  | 6.52%  | -0.002 | -0.003 | -0.003 |
|        |       |        |        |        | $\langle 538   R^2, b^0, s_{\text{HB}}^1, s_{\text{free}}^0, t^0 \rangle$  | 3.52%  | 0.003  | 0.003  | -0.005 |
|        |       |        |        |        | $\langle 538   R^0, b^0, s_{\text{HB}}^1, s_{\text{free}}^0, t^0 \rangle$  | 0.07%  | -0.008 | 0.000  | 0.001  |
| 5065.5 | 0.098 | -0.002 | -0.002 | -0.001 | $\langle 549   R^0, b^1, s_{\text{HB}}^1, s_{\text{free}}^0, t^2 \rangle$  | 20.41% | 0.000  | 0.000  | 0.000  |
|        |       |        |        |        | $\langle 549   R^0, b^1, s_{\text{HB}}^1, s_{\text{free}}^0, t^1 \rangle$  | 9.01%  | 0.000  | 0.000  | 0.000  |
|        |       |        |        |        | $\langle 549   R^0, b^3, s_{\text{HB}}^0, s_{\text{free}}^0, t^1 \rangle$  | 8.23%  | 0.000  | 0.000  | 0.000  |
|        |       |        |        |        | $\langle 549   R^2, b^0, s_{\text{HB}}^1, s_{\text{free}}^0, t^1 \rangle$  | 6.00%  | 0.002  | 0.000  | 0.000  |
|        |       |        |        |        | $\langle 549   R^0, b^3, s_{\text{HB}}^0, s_{\text{free}}^0, t^2 \rangle$  | 5.39%  | 0.000  | 0.000  | 0.000  |
|        |       |        |        |        | $\langle 549   R^2, b^2, s_{\text{HB}}^0, s_{\text{free}}^0, t^2 \rangle$  | 5.01%  | 0.000  | 0.000  | 0.000  |
|        |       |        |        |        | $\langle 549   R^0, b^1, s_{\text{HB}}^1, s_{\text{free}}^0, t^0 \rangle$  | 1.99%  | -0.003 | 0.000  | 0.001  |
|        |       |        |        |        | $\langle 549   R^2, b^0, s_{\text{HB}}^1, s_{\text{free}}^0, t^0 \rangle$  | 0.65%  | 0.001  | 0.001  | -0.002 |
|        |       |        |        |        | $\langle 549   R^0, b^0, s_{\text{HB}}^1, s_{\text{free}}^0, t^0 \rangle$  | 0.01%  | -0.004 | 0.000  | 0.000  |
| 5169.0 | 0.451 | -0.006 | -0.001 | -0.001 | $\langle 581   R^4, b^1, s_{\text{HB}}^0, s_{\text{free}}^0, t^0 \rangle$  | 18.03% | 0.000  | 0.000  | 0.000  |
|        |       |        |        |        | $\langle 581   R^0, b^1, s_{\text{HB}}^0, s_{\text{free}}^1, t^0 \rangle$  | 11.03% | -0.002 | -0.004 | -0.004 |
|        |       |        |        |        | $\langle 581   R^2, b^2, s_{\text{HB}}^0, s_{\text{free}}^0, t^0 \rangle$  | 9.68%  | 0.000  | 0.000  | 0.000  |
|        |       |        |        |        | $\langle 581   R^2, b^0, s_{\text{HB}}^1, s_{\text{free}}^0, t^1 \rangle$  | 6.49%  | 0.000  | 0.000  | 0.000  |
|        |       |        |        |        | $\langle 581   R^2, b^0, s_{\text{HB}}^0, s_{\text{free}}^1, t^0 \rangle$  | 5.07%  | 0.000  | 0.000  | 0.000  |
|        |       |        |        |        | $\langle 581   R^0, b^1, s_{\text{HB}}^0, s_{\text{free}}^0, t^0 \rangle$  | 0.07%  | -0.003 | 0.002  | 0.002  |
|        |       |        |        |        | $\langle 581   R^0, b^0, s_{\text{HB}}^0, s_{\text{free}}^1, t^0 \rangle$  | 0.05%  | -0.003 | -0.003 | -0.002 |
| 5173.1 | 2.412 | 0.013  | 0.004  | 0.003  | $\langle 583   R^0, b^1, s_{\text{HB}}^0, s_{\text{free}}^1, t^0 \rangle$  | 58.25% | 0.005  | 0.010  | 0.008  |
|        |       |        |        |        | $\langle 583   R^2, b^0, s_{\text{HB}}^0, s_{\text{free}}^1, t^0 \rangle$  | 6.39%  | -0.003 | -0.001 | -0.005 |
|        |       |        |        |        | $\langle 583   R^0, b^1, s_{\text{HB}}^0, s_{\text{free}}^0, t^0 \rangle$  | 0.41%  | 0.006  | -0.006 | -0.005 |
|        |       |        |        |        | $\langle 583   R^0, b^0, s_{\text{HB}}^0, s_{\text{free}}^1, t^0 \rangle$  | 0.13%  | 0.005  | 0.005  | 0.004  |
| 6388.1 | 0.062 | 0.002  | -0.000 | 0.000  | $\langle 1074   R^1, b^1, s_{\text{HB}}^0, s_{\text{free}}^1, t^0 \rangle$ | 12.41% | 0.000  | 0.000  | 0.000  |
|        |       |        |        |        | $\langle 1074   R^2, b^3, s_{\text{HB}}^0, s_{\text{free}}^0, t^0 \rangle$ | 8.43%  | 0.000  | 0.000  | 0.000  |
|        |       |        |        |        | $\langle 1074   R^2, b^1, s_{\text{HB}}^1, s_{\text{free}}^0, t^0 \rangle$ | 8.27%  | 0.004  | 0.000  | -0.003 |
|        |       |        |        |        | $\langle 1074   R^0, b^2, s_{\text{HB}}^1, s_{\text{free}}^0, t^0 \rangle$ | 6.44%  | 0.002  | 0.000  | -0.001 |
|        |       |        |        |        | $\langle 1074   R^0, b^4, s_{\text{HB}}^0, s_{\text{free}}^0, t^0 \rangle$ | 5.17%  | 0.000  | 0.000  | 0.000  |
|        |       |        |        |        | $\langle 1074   R^0, b^0, s_{\text{HB}}^2, s_{\text{free}}^0, t^0 \rangle$ | 3.70%  | 0.003  | -0.001 | -0.002 |
|        |       |        |        |        | $\langle 1074   R^0, b^0, s_{\text{HB}}^1, s_{\text{free}}^0, t^0 \rangle$ | 0.02%  | -0.004 | 0.000  | 0.000  |
| 6430.8 | 0.204 | 0.003  | -0.001 | 0.001  | $\langle 1092   R^6, b^0, s_{\text{HB}}^0, s_{\text{free}}^0, t^0 \rangle$ | 25.99% | 0.000  | 0.000  | 0.000  |
|        |       |        |        |        | $\langle 1092   R^0, b^0, s_{\text{HB}}^2, s_{\text{free}}^0, t^0 \rangle$ | 11.85% | 0.006  | -0.002 | -0.003 |

|        |       |        |        |        |                                                                          |        |        |        |        |
|--------|-------|--------|--------|--------|--------------------------------------------------------------------------|--------|--------|--------|--------|
|        |       |        |        |        | $\langle 1092 R^2, b^1, s_{\text{HB}}^1, s_{\text{free}}^0, t^0 \rangle$ | 3.17%  | -0.002 | 0.000  | 0.002  |
|        |       |        |        |        | $\langle 1092 R^0, b^0, s_{\text{HB}}^0, s_{\text{free}}^1, t^0 \rangle$ | 0.03%  | 0.002  | 0.003  | 0.002  |
| 6431.8 | 0.249 | 0.004  | -0.001 | 0.001  | $\langle 1093 R^6, b^0, s_{\text{HB}}^0, s_{\text{free}}^0, t^0 \rangle$ | 22.13% | 0.000  | 0.000  | 0.000  |
|        |       |        |        |        | $\langle 1093 R^0, b^0, s_{\text{HB}}^2, s_{\text{free}}^0, t^0 \rangle$ | 14.40% | 0.007  | -0.002 | -0.004 |
|        |       |        |        |        | $\langle 1093 R^0, b^0, s_{\text{HB}}^2, s_{\text{free}}^0, t^1 \rangle$ | 5.14%  | -0.002 | 0.000  | 0.000  |
|        |       |        |        |        | $\langle 1093 R^2, b^1, s_{\text{HB}}^1, s_{\text{free}}^0, t^0 \rangle$ | 4.21%  | -0.003 | 0.000  | 0.002  |
|        |       |        |        |        | $\langle 1093 R^0, b^0, s_{\text{HB}}^0, s_{\text{free}}^1, t^0 \rangle$ | 0.04%  | 0.003  | 0.003  | 0.002  |
| 6460.0 | 0.154 | 0.003  | -0.000 | 0.000  | $\langle 1108 R^0, b^4, s_{\text{HB}}^0, s_{\text{free}}^0, t^1 \rangle$ | 10.86% | 0.000  | 0.000  | 0.000  |
|        |       |        |        |        | $\langle 1108 R^0, b^0, s_{\text{HB}}^2, s_{\text{free}}^0, t^0 \rangle$ | 8.41%  | 0.005  | -0.002 | -0.003 |
|        |       |        |        |        | $\langle 1108 R^0, b^2, s_{\text{HB}}^1, s_{\text{free}}^0, t^1 \rangle$ | 8.38%  | 0.000  | 0.000  | 0.000  |
|        |       |        |        |        | $\langle 1108 R^5, b^1, s_{\text{HB}}^0, s_{\text{free}}^0, t^0 \rangle$ | 6.80%  | 0.000  | 0.000  | 0.000  |
|        |       |        |        |        | $\langle 1108 R^0, b^0, s_{\text{HB}}^1, s_{\text{free}}^1, t^0 \rangle$ | 0.47%  | -0.003 | 0.000  | 0.000  |
|        |       |        |        |        | $\langle 1108 R^0, b^0, s_{\text{HB}}^0, s_{\text{free}}^1, t^0 \rangle$ | 0.03%  | 0.002  | 0.002  | 0.002  |
| 6462.1 | 0.059 | -0.002 | 0.000  | -0.000 | $\langle 1112 R^5, b^0, s_{\text{HB}}^0, s_{\text{free}}^0, t^1 \rangle$ | 5.19%  | 0.000  | 0.000  | 0.000  |
|        |       |        |        |        | $\langle 1112 R^5, b^1, s_{\text{HB}}^0, s_{\text{free}}^0, t^0 \rangle$ | 5.03%  | 0.000  | 0.000  | 0.000  |
|        |       |        |        |        | $\langle 1112 R^0, b^0, s_{\text{HB}}^2, s_{\text{free}}^0, t^0 \rangle$ | 3.13%  | -0.003 | 0.001  | 0.002  |
|        |       |        |        |        | $\langle 1112 R^0, b^0, s_{\text{HB}}^1, s_{\text{free}}^1, t^0 \rangle$ | 0.17%  | 0.002  | 0.000  | 0.000  |
|        |       |        |        |        | $\langle 1112 R^0, b^0, s_{\text{HB}}^0, s_{\text{free}}^1, t^0 \rangle$ | 0.01%  | -0.001 | -0.001 | -0.001 |
| 6479.6 | 0.127 | 0.003  | 0.000  | 0.001  | $\langle 1119 R^1, b^1, s_{\text{HB}}^0, s_{\text{free}}^1, t^0 \rangle$ | 23.61% | 0.001  | 0.000  | 0.000  |
|        |       |        |        |        | $\langle 1119 R^0, b^2, s_{\text{HB}}^1, s_{\text{free}}^0, t^0 \rangle$ | 6.34%  | -0.002 | 0.000  | 0.000  |
|        |       |        |        |        | $\langle 1119 R^6, b^0, s_{\text{HB}}^0, s_{\text{free}}^0, t^0 \rangle$ | 5.22%  | 0.000  | 0.000  | 0.000  |
|        |       |        |        |        | $\langle 1119 R^0, b^0, s_{\text{HB}}^2, s_{\text{free}}^0, t^0 \rangle$ | 3.33%  | 0.003  | -0.001 | -0.002 |
|        |       |        |        |        | $\langle 1119 R^0, b^0, s_{\text{HB}}^1, s_{\text{free}}^1, t^0 \rangle$ | 0.31%  | -0.002 | 0.000  | 0.000  |
|        |       |        |        |        | $\langle 1119 R^0, b^0, s_{\text{HB}}^0, s_{\text{free}}^2, t^0 \rangle$ | 0.26%  | 0.002  | 0.001  | 0.001  |
| 6483.0 | 0.100 | 0.002  | -0.000 | 0.000  | $\langle 1121 R^0, b^2, s_{\text{HB}}^1, s_{\text{free}}^0, t^0 \rangle$ | 11.16% | -0.002 | 0.000  | 0.001  |
|        |       |        |        |        | $\langle 1121 R^2, b^3, s_{\text{HB}}^0, s_{\text{free}}^0, t^0 \rangle$ | 8.09%  | 0.000  | 0.000  | 0.000  |
|        |       |        |        |        | $\langle 1121 R^1, b^1, s_{\text{HB}}^0, s_{\text{free}}^1, t^1 \rangle$ | 5.47%  | 0.000  | 0.000  | 0.000  |
|        |       |        |        |        | $\langle 1121 R^0, b^4, s_{\text{HB}}^0, s_{\text{free}}^0, t^0 \rangle$ | 5.43%  | 0.000  | 0.000  | 0.000  |
|        |       |        |        |        | $\langle 1121 R^0, b^0, s_{\text{HB}}^2, s_{\text{free}}^0, t^0 \rangle$ | 2.98%  | 0.003  | -0.001 | -0.002 |
|        |       |        |        |        | $\langle 1121 R^0, b^0, s_{\text{HB}}^1, s_{\text{free}}^1, t^0 \rangle$ | 1.14%  | -0.004 | 0.000  | 0.001  |
|        |       |        |        |        | $\langle 1121 R^0, b^0, s_{\text{HB}}^1, s_{\text{free}}^0, t^0 \rangle$ | 0.03%  | 0.005  | 0.000  | -0.001 |
| 6549.6 | 0.199 | 0.003  | -0.000 | 0.000  | $\langle 1154 R^0, b^0, s_{\text{HB}}^2, s_{\text{free}}^0, t^1 \rangle$ | 20.86% | 0.003  | 0.001  | 0.000  |
|        |       |        |        |        | $\langle 1154 R^0, b^0, s_{\text{HB}}^2, s_{\text{free}}^0, t^0 \rangle$ | 11.87% | 0.006  | -0.002 | -0.003 |
|        |       |        |        |        | $\langle 1154 R^0, b^0, s_{\text{HB}}^2, s_{\text{free}}^0, t^2 \rangle$ | 11.27% | 0.000  | 0.000  | 0.000  |
|        |       |        |        |        | $\langle 1154 R^0, b^4, s_{\text{HB}}^0, s_{\text{free}}^0, t^1 \rangle$ | 10.16% | 0.000  | 0.000  | 0.000  |
|        |       |        |        |        | $\langle 1154 R^2, b^3, s_{\text{HB}}^0, s_{\text{free}}^0, t^1 \rangle$ | 5.09%  | 0.000  | 0.000  | 0.000  |
|        |       |        |        |        | $\langle 1154 R^0, b^0, s_{\text{HB}}^1, s_{\text{free}}^1, t^0 \rangle$ | 0.79%  | -0.003 | 0.000  | 0.001  |
| 6745.1 | 0.094 | 0.001  | 0.002  | 0.001  | $\langle 1247 R^0, b^2, s_{\text{HB}}^0, s_{\text{free}}^1, t^0 \rangle$ | 25.57% | 0.002  | 0.002  | 0.002  |
|        |       |        |        |        | $\langle 1247 R^4, b^0, s_{\text{HB}}^1, s_{\text{free}}^0, t^0 \rangle$ | 6.71%  | 0.001  | 0.001  | -0.002 |
|        |       |        |        |        | $\langle 1247 R^0, b^0, s_{\text{HB}}^1, s_{\text{free}}^1, t^0 \rangle$ | 5.98%  | -0.009 | 0.000  | 0.002  |
|        |       |        |        |        | $\langle 1247 R^0, b^0, s_{\text{HB}}^1, s_{\text{free}}^0, t^0 \rangle$ | 0.07%  | 0.008  | 0.000  | -0.001 |
| 6838.3 | 0.083 | -0.000 | -0.002 | -0.001 | $\langle 1304 R^5, b^1, s_{\text{HB}}^0, s_{\text{free}}^0, t^0 \rangle$ | 9.78%  | 0.000  | 0.000  | 0.000  |

|        |       |        |        |        |                                                                          |        |        |        |        |
|--------|-------|--------|--------|--------|--------------------------------------------------------------------------|--------|--------|--------|--------|
|        |       |        |        |        | $\langle 1304 R^0, b^0, s_{\text{HB}}^1, s_{\text{free}}^1, t^0 \rangle$ | 6.82%  | 0.010  | 0.000  | -0.002 |
|        |       |        |        |        | $\langle 1304 R^4, b^0, s_{\text{HB}}^0, s_{\text{free}}^1, t^0 \rangle$ | 6.00%  | 0.000  | 0.000  | -0.002 |
|        |       |        |        |        | $\langle 1304 R^2, b^1, s_{\text{HB}}^0, s_{\text{free}}^1, t^0 \rangle$ | 5.24%  | 0.000  | 0.001  | 0.002  |
|        |       |        |        |        | $\langle 1304 R^2, b^0, s_{\text{HB}}^1, s_{\text{free}}^0, t^0 \rangle$ | 0.74%  | -0.001 | -0.001 | 0.002  |
|        |       |        |        |        | $\langle 1304 R^0, b^0, s_{\text{HB}}^1, s_{\text{free}}^0, t^0 \rangle$ | 0.13%  | -0.011 | 0.000  | 0.001  |
| 6867.5 | 0.065 | -0.000 | 0.002  | 0.001  | $\langle 1318 R^2, b^3, s_{\text{HB}}^0, s_{\text{free}}^0, t^0 \rangle$ | 21.89% | 0.000  | 0.000  | 0.000  |
|        |       |        |        |        | $\langle 1318 R^0, b^0, s_{\text{HB}}^1, s_{\text{free}}^1, t^0 \rangle$ | 8.24%  | -0.011 | 0.000  | 0.002  |
|        |       |        |        |        | $\langle 1318 R^2, b^1, s_{\text{HB}}^1, s_{\text{free}}^0, t^0 \rangle$ | 5.49%  | 0.000  | 0.000  | 0.000  |
|        |       |        |        |        | $\langle 1318 R^0, b^0, s_{\text{HB}}^1, s_{\text{free}}^0, t^0 \rangle$ | 0.17%  | 0.013  | 0.000  | -0.001 |
|        |       |        |        |        | $\langle 1318 R^0, b^0, s_{\text{HB}}^0, s_{\text{free}}^1, t^0 \rangle$ | 0.03%  | 0.002  | 0.002  | 0.002  |
| 6871.1 | 0.136 | 0.000  | -0.002 | -0.002 | $\langle 1320 R^0, b^0, s_{\text{HB}}^1, s_{\text{free}}^1, t^0 \rangle$ | 20.76% | 0.017  | -0.001 | -0.003 |
|        |       |        |        |        | $\langle 1320 R^0, b^2, s_{\text{HB}}^0, s_{\text{free}}^1, t^0 \rangle$ | 7.91%  | 0.001  | 0.001  | 0.001  |
|        |       |        |        |        | $\langle 1320 R^0, b^0, s_{\text{HB}}^1, s_{\text{free}}^0, t^0 \rangle$ | 0.37%  | -0.019 | 0.000  | 0.002  |
|        |       |        |        |        | $\langle 1320 R^0, b^0, s_{\text{HB}}^0, s_{\text{free}}^1, t^0 \rangle$ | 0.06%  | -0.003 | -0.004 | -0.003 |
| 6878.3 | 0.114 | 0.000  | -0.002 | -0.001 | $\langle 1323 R^0, b^0, s_{\text{HB}}^1, s_{\text{free}}^1, t^0 \rangle$ | 12.93% | 0.013  | -0.001 | -0.002 |
|        |       |        |        |        | $\langle 1323 R^0, b^2, s_{\text{HB}}^0, s_{\text{free}}^1, t^2 \rangle$ | 9.21%  | 0.000  | 0.000  | 0.000  |
|        |       |        |        |        | $\langle 1323 R^2, b^1, s_{\text{HB}}^1, s_{\text{free}}^0, t^2 \rangle$ | 8.57%  | 0.000  | 0.000  | 0.000  |
|        |       |        |        |        | $\langle 1323 R^0, b^2, s_{\text{HB}}^1, s_{\text{free}}^0, t^2 \rangle$ | 5.83%  | 0.000  | 0.000  | 0.000  |
|        |       |        |        |        | $\langle 1323 R^0, b^0, s_{\text{HB}}^1, s_{\text{free}}^0, t^0 \rangle$ | 0.23%  | -0.015 | 0.000  | 0.002  |
|        |       |        |        |        | $\langle 1323 R^0, b^0, s_{\text{HB}}^0, s_{\text{free}}^1, t^0 \rangle$ | 0.02%  | -0.002 | -0.002 | -0.002 |
| 6957.4 | 0.189 | 0.001  | 0.003  | 0.001  | $\langle 1365 R^3, b^2, s_{\text{HB}}^0, s_{\text{free}}^0, t^0 \rangle$ | 10.70% | 0.000  | 0.000  | 0.000  |
|        |       |        |        |        | $\langle 1365 R^0, b^0, s_{\text{HB}}^0, s_{\text{free}}^2, t^0 \rangle$ | 5.76%  | 0.008  | 0.005  | 0.004  |
|        |       |        |        |        | $\langle 1365 R^0, b^0, s_{\text{HB}}^0, s_{\text{free}}^1, t^0 \rangle$ | 0.04%  | -0.002 | -0.003 | -0.002 |
|        |       |        |        |        | $\langle 1365 R^0, b^0, s_{\text{HB}}^1, s_{\text{free}}^0, t^0 \rangle$ | 0.00%  | -0.002 | 0.000  | 0.000  |
| 6957.9 | 0.101 | 0.001  | 0.002  | 0.001  | $\langle 1366 R^3, b^2, s_{\text{HB}}^0, s_{\text{free}}^2, t^2 \rangle$ | 16.51% | 0.000  | 0.000  | 0.000  |
|        |       |        |        |        | $\langle 1366 R^3, b^0, s_{\text{HB}}^1, s_{\text{free}}^0, t^2 \rangle$ | 6.02%  | 0.000  | 0.000  | 0.000  |
|        |       |        |        |        | $\langle 1366 R^0, b^0, s_{\text{HB}}^0, s_{\text{free}}^2, t^0 \rangle$ | 3.12%  | 0.006  | 0.004  | 0.003  |
|        |       |        |        |        | $\langle 1366 R^0, b^0, s_{\text{HB}}^0, s_{\text{free}}^1, t^0 \rangle$ | 0.02%  | -0.002 | -0.002 | -0.001 |
|        |       |        |        |        | $\langle 1366 R^0, b^0, s_{\text{HB}}^1, s_{\text{free}}^0, t^0 \rangle$ | 0.00%  | -0.002 | 0.000  | 0.000  |
| 6958.6 | 0.957 | 0.002  | 0.007  | 0.003  | $\langle 1367 R^0, b^0, s_{\text{HB}}^0, s_{\text{free}}^2, t^0 \rangle$ | 28.98% | 0.017  | 0.012  | 0.008  |
|        |       |        |        |        | $\langle 1367 R^3, b^2, s_{\text{HB}}^0, s_{\text{free}}^0, t^0 \rangle$ | 18.89% | 0.000  | 0.000  | 0.000  |
|        |       |        |        |        | $\langle 1367 R^0, b^0, s_{\text{HB}}^1, s_{\text{free}}^1, t^1 \rangle$ | 5.41%  | 0.001  | 0.000  | 0.000  |
|        |       |        |        |        | $\langle 1367 R^0, b^0, s_{\text{HB}}^0, s_{\text{free}}^1, t^0 \rangle$ | 0.18%  | -0.006 | -0.006 | -0.004 |
|        |       |        |        |        | $\langle 1367 R^0, b^0, s_{\text{HB}}^1, s_{\text{free}}^0, t^0 \rangle$ | 0.02%  | -0.005 | 0.000  | 0.001  |
| 6959.3 | 0.684 | 0.001  | 0.005  | 0.003  | $\langle 1368 R^0, b^0, s_{\text{HB}}^0, s_{\text{free}}^2, t^0 \rangle$ | 20.74% | 0.015  | 0.010  | 0.007  |
|        |       |        |        |        | $\langle 1368 R^3, b^2, s_{\text{HB}}^0, s_{\text{free}}^0, t^0 \rangle$ | 8.03%  | 0.000  | 0.000  | 0.000  |
|        |       |        |        |        | $\langle 1368 R^0, b^0, s_{\text{HB}}^0, s_{\text{free}}^1, t^0 \rangle$ | 0.13%  | -0.005 | -0.005 | -0.004 |
|        |       |        |        |        | $\langle 1368 R^0, b^0, s_{\text{HB}}^1, s_{\text{free}}^0, t^0 \rangle$ | 0.02%  | -0.005 | 0.000  | 0.000  |
| 6972.3 | 0.110 | -0.001 | -0.002 | -0.001 | $\langle 1380 R^3, b^0, s_{\text{HB}}^1, s_{\text{free}}^0, t^1 \rangle$ | 34.56% | 0.000  | 0.000  | 0.000  |
|        |       |        |        |        | $\langle 1380 R^0, b^0, s_{\text{HB}}^1, s_{\text{free}}^1, t^1 \rangle$ | 5.35%  | 0.001  | 0.000  | 0.000  |
|        |       |        |        |        | $\langle 1380 R^5, b^1, s_{\text{HB}}^0, s_{\text{free}}^0, t^1 \rangle$ | 5.15%  | 0.000  | 0.000  | 0.000  |
|        |       |        |        |        | $\langle 1380 R^0, b^0, s_{\text{HB}}^0, s_{\text{free}}^2, t^0 \rangle$ | 4.49%  | -0.007 | -0.005 | -0.003 |

|        |       |        |        |        |                                                                          |        |        |        |        |
|--------|-------|--------|--------|--------|--------------------------------------------------------------------------|--------|--------|--------|--------|
|        |       |        |        |        | $\langle 1380 R^0, b^0, s_{\text{HB}}^1, s_{\text{free}}^0, t^0 \rangle$ | 0.03%  | 0.005  | 0.000  | -0.001 |
|        |       |        |        |        | $\langle 1380 R^0, b^0, s_{\text{HB}}^0, s_{\text{free}}^1, t^0 \rangle$ | 0.03%  | 0.002  | 0.003  | 0.002  |
| 6973.7 | 0.462 | -0.001 | -0.005 | -0.002 | $\langle 1381 R^0, b^0, s_{\text{HB}}^1, s_{\text{free}}^1, t^1 \rangle$ | 28.84% | 0.003  | 0.000  | 0.000  |
|        |       |        |        |        | $\langle 1381 R^0, b^0, s_{\text{HB}}^0, s_{\text{free}}^2, t^0 \rangle$ | 19.40% | -0.014 | -0.010 | -0.007 |
|        |       |        |        |        | $\langle 1381 R^0, b^2, s_{\text{HB}}^0, s_{\text{free}}^1, t^1 \rangle$ | 6.62%  | 0.000  | 0.000  | 0.000  |
|        |       |        |        |        | $\langle 1381 R^0, b^0, s_{\text{HB}}^0, s_{\text{free}}^1, t^0 \rangle$ | 0.14%  | 0.005  | 0.005  | 0.004  |
|        |       |        |        |        | $\langle 1381 R^0, b^0, s_{\text{HB}}^1, s_{\text{free}}^0, t^0 \rangle$ | 0.13%  | 0.011  | 0.000  | -0.001 |

---

MeOH<sub>2</sub> ··· (N<sub>2</sub>)<sub>2</sub>

---

| $\omega$ | $I$   | $\mu_x$ | $\mu_y$ | $\mu_z$ | Assignment                                                                       | $ c_n ^2$ | $\mu_x^{g \rightarrow n}$ | $\mu_y^{g \rightarrow n}$ | $\mu_z^{g \rightarrow n}$ |
|----------|-------|---------|---------|---------|----------------------------------------------------------------------------------|-----------|---------------------------|---------------------------|---------------------------|
| 4022.0   | 0.822 | -0.007  | 0.006   | 0.000   | $\langle 928 R^1, b^0, s_{\text{sym}}^1, s_{\text{asym}}^0, t^0, s_X^0 \rangle$  | 41.23%    | 0.009                     | 0.010                     | 0.000                     |
|          |       |         |         |         | $\langle 928 R^1, b^2, s_{\text{sym}}^0, s_{\text{asym}}^0, t^0, s_X^0 \rangle$  | 21.64%    | 0.003                     | 0.001                     | 0.000                     |
|          |       |         |         |         | $\langle 928 R^3, b^0, s_{\text{sym}}^0, s_{\text{asym}}^0, t^0, s_X^0 \rangle$  | 4.76%     | -0.007                    | -0.001                    | 0.000                     |
|          |       |         |         |         | $\langle 928 R^1, b^0, s_{\text{sym}}^0, s_{\text{asym}}^0, t^0, s_X^0 \rangle$  | 0.10%     | -0.010                    | 0.000                     | 0.000                     |
| 4029.4   | 0.185 | 0.000   | -0.000  | 0.004   | $\langle 932 R^4, b^0, s_{\text{sym}}^0, s_{\text{asym}}^0, t^0, s_X^0 \rangle$  | 58.12%    | 0.000                     | 0.000                     | 0.000                     |
|          |       |         |         |         | $\langle 932 R^1, b^0, s_{\text{sym}}^0, s_{\text{asym}}^1, t^0, s_X^0 \rangle$  | 4.89%     | 0.000                     | 0.000                     | 0.005                     |
|          |       |         |         |         | $\langle 932 R^2, b^0, s_{\text{sym}}^0, s_{\text{asym}}^1, t^0, s_X^0 \rangle$  | 0.54%     | 0.000                     | 0.000                     | -0.002                    |
|          |       |         |         |         | $\langle 932 R^0, b^0, s_{\text{sym}}^0, s_{\text{asym}}^1, t^0, s_X^0 \rangle$  | 0.00%     | 0.000                     | 0.000                     | 0.002                     |
| 4039.7   | 1.927 | -0.000  | 0.000   | -0.014  | $\langle 939 R^1, b^0, s_{\text{sym}}^0, s_{\text{asym}}^1, t^0, s_X^0 \rangle$  | 47.50%    | 0.000                     | 0.000                     | -0.016                    |
|          |       |         |         |         | $\langle 939 R^2, b^1, s_{\text{sym}}^0, s_{\text{asym}}^0, t^0, s_X^0 \rangle$  | 11.58%    | 0.000                     | 0.000                     | 0.000                     |
|          |       |         |         |         | $\langle 939 R^0, b^0, s_{\text{sym}}^1, s_{\text{asym}}^1, t^0, s_X^0 \rangle$  | 0.09%     | 0.000                     | 0.000                     | 0.003                     |
|          |       |         |         |         | $\langle 939 R^0, b^0, s_{\text{sym}}^0, s_{\text{asym}}^1, t^0, s_X^0 \rangle$  | 0.00%     | 0.000                     | 0.000                     | 0.003                     |
| 4097.9   | 0.554 | 0.006   | -0.004  | -0.000  | $\langle 982 R^1, b^2, s_{\text{sym}}^0, s_{\text{asym}}^0, t^0, s_X^0 \rangle$  | 26.05%    | 0.003                     | 0.001                     | 0.000                     |
|          |       |         |         |         | $\langle 982 R^1, b^0, s_{\text{sym}}^1, s_{\text{asym}}^0, t^0, s_X^0 \rangle$  | 22.28%    | -0.007                    | -0.007                    | 0.000                     |
|          |       |         |         |         | $\langle 982 R^3, b^1, s_{\text{sym}}^0, s_{\text{asym}}^0, t^0, s_X^0 \rangle$  | 9.27%     | 0.003                     | 0.001                     | 0.000                     |
|          |       |         |         |         | $\langle 982 R^1, b^0, s_{\text{sym}}^0, s_{\text{asym}}^1, t^1, s_X^0 \rangle$  | 6.35%     | 0.001                     | 0.000                     | 0.000                     |
|          |       |         |         |         | $\langle 982 R^0, b^0, s_{\text{sym}}^1, s_{\text{asym}}^0, t^0, s_X^0 \rangle$  | 0.02%     | 0.000                     | 0.004                     | 0.000                     |
|          |       |         |         |         | $\langle 982 R^1, b^0, s_{\text{sym}}^0, s_{\text{asym}}^0, t^0, s_X^0 \rangle$  | 0.01%     | 0.003                     | 0.000                     | 0.000                     |
| 4148.7   | 0.088 | -0.002  | 0.002   | 0.000   | $\langle 1030 R^4, b^0, s_{\text{sym}}^0, s_{\text{asym}}^0, t^0, s_X^0 \rangle$ | 60.85%    | 0.001                     | 0.000                     | 0.000                     |
|          |       |         |         |         | $\langle 1030 R^2, b^0, s_{\text{sym}}^1, s_{\text{asym}}^0, t^0, s_X^0 \rangle$ | 0.68%     | 0.001                     | 0.002                     | 0.000                     |
|          |       |         |         |         | $\langle 1030 R^1, b^0, s_{\text{sym}}^0, s_{\text{asym}}^0, t^0, s_X^0 \rangle$ | 0.02%     | -0.004                    | 0.000                     | 0.000                     |
|          |       |         |         |         | $\langle 1030 R^0, b^0, s_{\text{sym}}^1, s_{\text{asym}}^0, t^0, s_X^0 \rangle$ | 0.01%     | 0.000                     | -0.002                    | 0.000                     |
| 4166.1   | 0.228 | -0.004  | 0.003   | 0.000   | $\langle 1037 R^1, b^0, s_{\text{sym}}^0, s_{\text{asym}}^1, t^1, s_X^0 \rangle$ | 48.98%    | 0.003                     | 0.000                     | 0.000                     |
|          |       |         |         |         | $\langle 1037 R^1, b^0, s_{\text{sym}}^1, s_{\text{asym}}^0, t^0, s_X^0 \rangle$ | 8.93%     | 0.004                     | 0.005                     | 0.000                     |
|          |       |         |         |         | $\langle 1037 R^1, b^0, s_{\text{sym}}^1, s_{\text{asym}}^0, t^1, s_X^0 \rangle$ | 5.83%     | -0.001                    | -0.002                    | 0.000                     |
|          |       |         |         |         | $\langle 1037 R^1, b^0, s_{\text{sym}}^0, s_{\text{asym}}^0, t^0, s_X^0 \rangle$ | 0.06%     | -0.007                    | 0.000                     | 0.000                     |

|        |       |        |        |        |                                                                                    |        |        |        |        |
|--------|-------|--------|--------|--------|------------------------------------------------------------------------------------|--------|--------|--------|--------|
| 4216.3 | 0.271 | -0.004 | 0.003  | 0.000  | $\langle 1075   R^4, b^0, s_{\text{sym}}^0, s_{\text{asym}}^0, t^0, s_X^0 \rangle$ | 48.75% | 0.000  | 0.000  | 0.000  |
|        |       |        |        |        | $\langle 1075   R^1, b^0, s_{\text{sym}}^0, s_{\text{asym}}^1, t^0, s_X^0 \rangle$ | 24.40% | 0.002  | 0.001  | 0.000  |
|        |       |        |        |        | $\langle 1075   R^0, b^0, s_{\text{sym}}^1, s_{\text{asym}}^0, t^0, s_X^0 \rangle$ | 0.01%  | 0.000  | 0.003  | 0.000  |
|        |       |        |        |        | $\langle 1075   R^1, b^0, s_{\text{sym}}^0, s_{\text{asym}}^0, t^0, s_X^0 \rangle$ | 0.01%  | -0.003 | 0.000  | 0.000  |
| 4223.3 | 0.070 | 0.002  | -0.002 | -0.000 | $\langle 1081   R^4, b^0, s_{\text{sym}}^0, s_{\text{asym}}^0, t^1, s_X^0 \rangle$ | 33.56% | 0.000  | 0.000  | 0.000  |
|        |       |        |        |        | $\langle 1081   R^4, b^0, s_{\text{sym}}^0, s_{\text{asym}}^0, t^2, s_X^0 \rangle$ | 16.29% | 0.000  | 0.000  | 0.000  |
|        |       |        |        |        | $\langle 1081   R^1, b^0, s_{\text{sym}}^0, s_{\text{asym}}^1, t^0, s_X^0 \rangle$ | 4.88%  | 0.000  | -0.001 | 0.000  |
|        |       |        |        |        | $\langle 1081   R^1, b^0, s_{\text{sym}}^0, s_{\text{asym}}^0, t^0, s_X^0 \rangle$ | 0.00%  | 0.001  | 0.000  | 0.000  |
| 4229.4 | 0.065 | 0.002  | -0.002 | -0.000 | $\langle 1088   R^4, b^0, s_{\text{sym}}^0, s_{\text{asym}}^0, t^2, s_X^0 \rangle$ | 46.84% | 0.000  | 0.000  | 0.000  |
|        |       |        |        |        | $\langle 1088   R^4, b^0, s_{\text{sym}}^0, s_{\text{asym}}^0, t^1, s_X^0 \rangle$ | 7.48%  | 0.000  | 0.000  | 0.000  |
|        |       |        |        |        | $\langle 1088   R^1, b^0, s_{\text{sym}}^0, s_{\text{asym}}^1, t^0, s_X^0 \rangle$ | 4.75%  | 0.000  | 0.000  | 0.000  |
|        |       |        |        |        | $\langle 1088   R^1, b^0, s_{\text{sym}}^0, s_{\text{asym}}^0, t^0, s_X^0 \rangle$ | 0.00%  | 0.001  | 0.000  | 0.000  |
| 4233.4 | 0.215 | 0.003  | -0.003 | -0.000 | $\langle 1093   R^4, b^0, s_{\text{sym}}^0, s_{\text{asym}}^0, t^1, s_X^0 \rangle$ | 39.28% | 0.000  | 0.000  | 0.000  |
|        |       |        |        |        | $\langle 1093   R^1, b^0, s_{\text{sym}}^0, s_{\text{asym}}^1, t^0, s_X^0 \rangle$ | 16.41% | -0.001 | -0.002 | 0.000  |
|        |       |        |        |        | $\langle 1093   R^1, b^0, s_{\text{sym}}^0, s_{\text{asym}}^0, t^0, s_X^0 \rangle$ | 0.01%  | 0.003  | 0.000  | 0.000  |
| 4238.7 | 0.159 | 0.003  | -0.003 | -0.000 | $\langle 1099   R^4, b^0, s_{\text{sym}}^0, s_{\text{asym}}^0, t^1, s_X^0 \rangle$ | 33.40% | 0.000  | 0.000  | 0.000  |
|        |       |        |        |        | $\langle 1099   R^1, b^0, s_{\text{sym}}^0, s_{\text{asym}}^1, t^0, s_X^0 \rangle$ | 13.80% | -0.001 | -0.001 | 0.000  |
|        |       |        |        |        | $\langle 1099   R^4, b^0, s_{\text{sym}}^0, s_{\text{asym}}^0, t^0, s_X^0 \rangle$ | 11.67% | 0.000  | 0.000  | 0.000  |
|        |       |        |        |        | $\langle 1099   R^1, b^0, s_{\text{sym}}^0, s_{\text{asym}}^0, t^0, s_X^0 \rangle$ | 0.00%  | 0.002  | 0.000  | 0.000  |
| 4268.1 | 0.229 | 0.003  | -0.003 | 0.000  | $\langle 1130   R^2, b^1, s_{\text{sym}}^0, s_{\text{asym}}^0, t^0, s_X^0 \rangle$ | 65.71% | 0.000  | -0.004 | 0.000  |
|        |       |        |        |        | $\langle 1130   R^1, b^0, s_{\text{sym}}^0, s_{\text{asym}}^1, t^0, s_X^0 \rangle$ | 9.48%  | -0.001 | -0.003 | 0.000  |
|        |       |        |        |        | $\langle 1130   R^1, b^0, s_{\text{sym}}^0, s_{\text{asym}}^0, t^0, s_X^0 \rangle$ | 0.01%  | 0.002  | 0.000  | 0.000  |
| 4333.0 | 0.085 | -0.002 | 0.002  | -0.000 | $\langle 1173   R^1, b^0, s_{\text{sym}}^1, s_{\text{asym}}^0, t^1, s_X^0 \rangle$ | 36.57% | 0.000  | 0.001  | 0.000  |
|        |       |        |        |        | $\langle 1173   R^1, b^2, s_{\text{sym}}^0, s_{\text{asym}}^0, t^1, s_X^0 \rangle$ | 5.90%  | 0.000  | 0.000  | 0.000  |
|        |       |        |        |        | $\langle 1173   R^1, b^0, s_{\text{sym}}^1, s_{\text{asym}}^0, t^2, s_X^0 \rangle$ | 5.16%  | 0.000  | 0.000  | 0.000  |
|        |       |        |        |        | $\langle 1173   R^1, b^0, s_{\text{sym}}^0, s_{\text{asym}}^1, t^0, s_X^0 \rangle$ | 2.50%  | 0.000  | 0.002  | 0.000  |
|        |       |        |        |        | $\langle 1173   R^3, b^1, s_{\text{sym}}^0, s_{\text{asym}}^0, t^0, s_X^0 \rangle$ | 1.20%  | 0.001  | 0.000  | 0.000  |
|        |       |        |        |        | $\langle 1173   R^1, b^0, s_{\text{sym}}^0, s_{\text{asym}}^0, t^0, s_X^0 \rangle$ | 0.00%  | -0.002 | 0.000  | 0.000  |
| 4374.2 | 0.065 | -0.000 | 0.000  | -0.002 | $\langle 1205   R^4, b^0, s_{\text{sym}}^0, s_{\text{asym}}^0, t^1, s_X^0 \rangle$ | 25.35% | 0.000  | 0.000  | 0.000  |
|        |       |        |        |        | $\langle 1205   R^1, b^0, s_{\text{sym}}^0, s_{\text{asym}}^1, t^0, s_X^0 \rangle$ | 21.74% | 0.000  | 0.000  | -0.002 |
|        |       |        |        |        | $\langle 1205   R^4, b^0, s_{\text{sym}}^0, s_{\text{asym}}^0, t^0, s_X^0 \rangle$ | 6.39%  | 0.000  | 0.000  | 0.000  |
|        |       |        |        |        | $\langle 1205   R^0, b^1, s_{\text{sym}}^0, s_{\text{asym}}^1, t^0, s_X^0 \rangle$ | 0.26%  | 0.000  | 0.000  | -0.002 |
|        |       |        |        |        | $\langle 1205   R^0, b^0, s_{\text{sym}}^0, s_{\text{asym}}^1, t^0, s_X^0 \rangle$ | 0.00%  | 0.000  | 0.000  | 0.003  |
| 4383.5 | 0.111 | -0.000 | 0.000  | -0.003 | $\langle 1211   R^1, b^0, s_{\text{sym}}^0, s_{\text{asym}}^1, t^0, s_X^0 \rangle$ | 33.91% | 0.000  | 0.000  | -0.002 |
|        |       |        |        |        | $\langle 1211   R^4, b^0, s_{\text{sym}}^0, s_{\text{asym}}^0, t^0, s_X^0 \rangle$ | 18.27% | 0.000  | 0.000  | 0.000  |
|        |       |        |        |        | $\langle 1211   R^2, b^1, s_{\text{sym}}^0, s_{\text{asym}}^0, t^0, s_X^0 \rangle$ | 6.83%  | 0.000  | 0.000  | 0.000  |
|        |       |        |        |        | $\langle 1211   R^4, b^0, s_{\text{sym}}^0, s_{\text{asym}}^0, t^1, s_X^0 \rangle$ | 5.39%  | 0.000  | 0.000  | 0.000  |
|        |       |        |        |        | $\langle 1211   R^0, b^1, s_{\text{sym}}^0, s_{\text{asym}}^1, t^0, s_X^0 \rangle$ | 0.43%  | 0.000  | 0.000  | -0.002 |
|        |       |        |        |        | $\langle 1211   R^0, b^0, s_{\text{sym}}^0, s_{\text{asym}}^1, t^0, s_X^0 \rangle$ | 0.01%  | 0.000  | 0.000  | 0.004  |
| 4427.4 | 0.157 | -0.000 | 0.000  | -0.004 | $\langle 1249   R^3, b^1, s_{\text{sym}}^0, s_{\text{asym}}^0, t^0, s_X^0 \rangle$ | 37.99% | 0.000  | 0.000  | 0.000  |
|        |       |        |        |        | $\langle 1249   R^1, b^2, s_{\text{sym}}^0, s_{\text{asym}}^0, t^0, s_X^0 \rangle$ | 22.29% | 0.000  | 0.000  | 0.001  |

|        |       |        |        |        |                                                                                    |        |        |        |        |
|--------|-------|--------|--------|--------|------------------------------------------------------------------------------------|--------|--------|--------|--------|
|        |       |        |        |        | $\langle 1249   R^2, b^0, s_{\text{sym}}^0, s_{\text{asym}}^1, t^0, s_X^0 \rangle$ | 2.91%  | 0.000  | 0.000  | 0.005  |
|        |       |        |        |        | $\langle 1249   R^0, b^1, s_{\text{sym}}^0, s_{\text{asym}}^1, t^0, s_X^0 \rangle$ | 2.01%  | 0.000  | 0.000  | -0.004 |
|        |       |        |        |        | $\langle 1249   R^0, b^0, s_{\text{sym}}^0, s_{\text{asym}}^1, t^0, s_X^0 \rangle$ | 0.00%  | 0.000  | 0.000  | -0.003 |
| 4428.7 | 0.066 | -0.002 | 0.002  | 0.000  | $\langle 1252   R^4, b^0, s_{\text{sym}}^0, s_{\text{asym}}^0, t^0, s_X^0 \rangle$ | 60.37% | 0.000  | -0.001 | 0.000  |
|        |       |        |        |        | $\langle 1252   R^3, b^0, s_{\text{sym}}^0, s_{\text{asym}}^0, t^0, s_X^0 \rangle$ | 1.51%  | 0.002  | 0.000  | 0.000  |
|        |       |        |        |        | $\langle 1252   R^2, b^0, s_{\text{sym}}^1, s_{\text{asym}}^0, t^0, s_X^0 \rangle$ | 0.58%  | 0.000  | -0.001 | 0.000  |
|        |       |        |        |        | $\langle 1252   R^1, b^0, s_{\text{sym}}^0, s_{\text{asym}}^0, t^0, s_X^0 \rangle$ | 0.02%  | -0.004 | 0.000  | 0.000  |
| 4486.7 | 0.098 | -0.000 | 0.000  | -0.003 | $\langle 1293   R^1, b^0, s_{\text{sym}}^1, s_{\text{asym}}^0, t^0, s_X^0 \rangle$ | 52.72% | 0.000  | 0.000  | 0.006  |
|        |       |        |        |        | $\langle 1293   R^1, b^2, s_{\text{sym}}^0, s_{\text{asym}}^0, t^0, s_X^0 \rangle$ | 13.62% | 0.000  | 0.000  | 0.000  |
|        |       |        |        |        | $\langle 1293   R^0, b^1, s_{\text{sym}}^0, s_{\text{asym}}^1, t^0, s_X^0 \rangle$ | 1.73%  | 0.000  | 0.000  | -0.004 |
|        |       |        |        |        | $\langle 1293   R^0, b^0, s_{\text{sym}}^0, s_{\text{asym}}^1, t^0, s_X^0 \rangle$ | 0.01%  | 0.000  | 0.000  | -0.004 |
| 4526.2 | 0.753 | -0.006 | 0.006  | 0.000  | $\langle 1328   R^1, b^0, s_{\text{sym}}^0, s_{\text{asym}}^1, t^0, s_X^0 \rangle$ | 46.41% | 0.000  | 0.007  | 0.000  |
|        |       |        |        |        | $\langle 1328   R^2, b^1, s_{\text{sym}}^0, s_{\text{asym}}^0, t^0, s_X^0 \rangle$ | 12.02% | -0.001 | -0.001 | 0.000  |
|        |       |        |        |        | $\langle 1328   R^0, b^0, s_{\text{sym}}^1, s_{\text{asym}}^0, t^0, s_X^0 \rangle$ | 0.03%  | 0.000  | -0.006 | 0.000  |
|        |       |        |        |        | $\langle 1328   R^1, b^0, s_{\text{sym}}^0, s_{\text{asym}}^0, t^0, s_X^0 \rangle$ | 0.03%  | -0.005 | 0.000  | 0.000  |
| 4563.3 | 0.056 | 0.002  | -0.002 | 0.000  | $\langle 1360   R^2, b^1, s_{\text{sym}}^0, s_{\text{asym}}^0, t^2, s_X^0 \rangle$ | 53.32% | 0.000  | 0.000  | 0.000  |
|        |       |        |        |        | $\langle 1360   R^1, b^0, s_{\text{sym}}^0, s_{\text{asym}}^1, t^2, s_X^0 \rangle$ | 9.35%  | 0.000  | 0.000  | 0.000  |
|        |       |        |        |        | $\langle 1360   R^4, b^0, s_{\text{sym}}^0, s_{\text{asym}}^0, t^2, s_X^0 \rangle$ | 5.89%  | 0.000  | 0.000  | 0.000  |
|        |       |        |        |        | $\langle 1360   R^1, b^0, s_{\text{sym}}^0, s_{\text{asym}}^1, t^0, s_X^0 \rangle$ | 1.74%  | 0.000  | -0.001 | 0.000  |
|        |       |        |        |        | $\langle 1360   R^1, b^0, s_{\text{sym}}^0, s_{\text{asym}}^0, t^0, s_X^0 \rangle$ | 0.00%  | 0.002  | 0.000  | 0.000  |
|        |       |        |        |        | $\langle 1360   R^0, b^0, s_{\text{sym}}^1, s_{\text{asym}}^0, t^0, s_X^0 \rangle$ | 0.00%  | 0.000  | 0.001  | 0.000  |
| 4574.0 | 0.079 | -0.000 | 0.000  | 0.003  | $\langle 1370   R^1, b^2, s_{\text{sym}}^0, s_{\text{asym}}^0, t^0, s_X^0 \rangle$ | 26.03% | 0.000  | 0.000  | 0.000  |
|        |       |        |        |        | $\langle 1370   R^1, b^0, s_{\text{sym}}^1, s_{\text{asym}}^0, t^0, s_X^0 \rangle$ | 15.96% | 0.000  | 0.000  | 0.003  |
|        |       |        |        |        | $\langle 1370   R^2, b^1, s_{\text{sym}}^0, s_{\text{asym}}^0, t^2, s_X^0 \rangle$ | 12.99% | 0.000  | 0.000  | 0.000  |
|        |       |        |        |        | $\langle 1370   R^3, b^1, s_{\text{sym}}^0, s_{\text{asym}}^0, t^0, s_X^0 \rangle$ | 7.17%  | 0.000  | 0.000  | 0.000  |
|        |       |        |        |        | $\langle 1370   R^0, b^1, s_{\text{sym}}^0, s_{\text{asym}}^1, t^0, s_X^0 \rangle$ | 4.20%  | 0.000  | 0.000  | 0.006  |
|        |       |        |        |        | $\langle 1370   R^2, b^0, s_{\text{sym}}^0, s_{\text{asym}}^1, t^0, s_X^0 \rangle$ | 1.39%  | 0.000  | 0.000  | 0.003  |
|        |       |        |        |        | $\langle 1370   R^0, b^0, s_{\text{sym}}^0, s_{\text{asym}}^1, t^0, s_X^0 \rangle$ | 0.03%  | 0.000  | 0.000  | -0.008 |
| 4624.5 | 0.069 | -0.002 | 0.002  | -0.000 | $\langle 1415   R^1, b^0, s_{\text{sym}}^1, s_{\text{asym}}^0, t^1, s_X^0 \rangle$ | 39.22% | 0.000  | -0.001 | 0.000  |
|        |       |        |        |        | $\langle 1415   R^1, b^2, s_{\text{sym}}^0, s_{\text{asym}}^0, t^1, s_X^0 \rangle$ | 8.75%  | 0.000  | 0.000  | 0.000  |
|        |       |        |        |        | $\langle 1415   R^1, b^0, s_{\text{sym}}^0, s_{\text{asym}}^1, t^0, s_X^0 \rangle$ | 2.15%  | 0.000  | 0.002  | 0.000  |
|        |       |        |        |        | $\langle 1415   R^1, b^0, s_{\text{sym}}^0, s_{\text{asym}}^0, t^0, s_X^0 \rangle$ | 0.00%  | -0.002 | 0.000  | 0.000  |
|        |       |        |        |        | $\langle 1415   R^0, b^0, s_{\text{sym}}^1, s_{\text{asym}}^0, t^0, s_X^0 \rangle$ | 0.00%  | 0.000  | -0.001 | 0.000  |
| 4672.5 | 0.057 | -0.000 | 0.000  | 0.002  | $\langle 1456   R^0, b^0, s_{\text{sym}}^0, s_{\text{asym}}^0, t^0, s_X^2 \rangle$ | 90.75% | 0.000  | 0.000  | -0.007 |
|        |       |        |        |        | $\langle 1456   R^0, b^0, s_{\text{sym}}^0, s_{\text{asym}}^0, t^0, s_X^1 \rangle$ | 1.23%  | 0.000  | 0.000  | 0.009  |
|        |       |        |        |        | $\langle 1456   R^0, b^0, s_{\text{sym}}^0, s_{\text{asym}}^0, t^0, s_X^3 \rangle$ | 1.04%  | 0.000  | 0.000  | 0.000  |
| 4697.0 | 0.339 | -0.000 | 0.000  | -0.005 | $\langle 1480   R^3, b^1, s_{\text{sym}}^0, s_{\text{asym}}^0, t^0, s_X^0 \rangle$ | 20.06% | 0.000  | 0.000  | 0.000  |
|        |       |        |        |        | $\langle 1480   R^5, b^0, s_{\text{sym}}^0, s_{\text{asym}}^0, t^0, s_X^0 \rangle$ | 16.58% | 0.000  | 0.000  | 0.000  |
|        |       |        |        |        | $\langle 1480   R^1, b^2, s_{\text{sym}}^0, s_{\text{asym}}^0, t^0, s_X^0 \rangle$ | 9.47%  | 0.000  | 0.000  | 0.000  |
|        |       |        |        |        | $\langle 1480   R^2, b^0, s_{\text{sym}}^0, s_{\text{asym}}^1, t^0, s_X^0 \rangle$ | 4.20%  | 0.000  | 0.000  | 0.006  |
|        |       |        |        |        | $\langle 1480   R^0, b^1, s_{\text{sym}}^0, s_{\text{asym}}^1, t^0, s_X^0 \rangle$ | 3.60%  | 0.000  | 0.000  | -0.006 |

|        |       |        |        |        |                                                                                    |        |        |        |        |
|--------|-------|--------|--------|--------|------------------------------------------------------------------------------------|--------|--------|--------|--------|
|        |       |        |        |        | $\langle 1480   R^0, b^0, s_{\text{sym}}^0, s_{\text{asym}}^1, t^0, s_X^0 \rangle$ | 0.01%  | 0.000  | 0.000  | -0.004 |
| 4711.6 | 0.106 | 0.001  | -0.003 | -0.000 | $\langle 1492   R^1, b^2, s_{\text{sym}}^0, s_{\text{asym}}^0, t^1, s_X^0 \rangle$ | 38.37% | 0.000  | 0.000  | 0.000  |
|        |       |        |        |        | $\langle 1492   R^0, b^1, s_{\text{sym}}^0, s_{\text{asym}}^1, t^1, s_X^0 \rangle$ | 9.61%  | 0.000  | 0.000  | 0.000  |
|        |       |        |        |        | $\langle 1492   R^0, b^1, s_{\text{sym}}^1, s_{\text{asym}}^0, t^0, s_X^0 \rangle$ | 8.16%  | 0.000  | 0.002  | 0.000  |
|        |       |        |        |        | $\langle 1492   R^1, b^0, s_{\text{sym}}^1, s_{\text{asym}}^0, t^1, s_X^0 \rangle$ | 6.97%  | 0.000  | 0.001  | 0.000  |
|        |       |        |        |        | $\langle 1492   R^2, b^0, s_{\text{sym}}^1, s_{\text{asym}}^0, t^0, s_X^0 \rangle$ | 0.85%  | 0.002  | 0.002  | 0.000  |
|        |       |        |        |        | $\langle 1492   R^0, b^0, s_{\text{sym}}^1, s_{\text{asym}}^0, t^0, s_X^0 \rangle$ | 0.03%  | 0.000  | -0.006 | 0.000  |
| 4719.4 | 0.149 | 0.000  | -0.000 | -0.004 | $\langle 1497   R^5, b^0, s_{\text{sym}}^0, s_{\text{asym}}^0, t^0, s_X^0 \rangle$ | 24.04% | 0.000  | 0.000  | 0.000  |
|        |       |        |        |        | $\langle 1497   R^3, b^1, s_{\text{sym}}^0, s_{\text{asym}}^0, t^0, s_X^0 \rangle$ | 14.93% | 0.000  | 0.000  | 0.000  |
|        |       |        |        |        | $\langle 1497   R^1, b^2, s_{\text{sym}}^0, s_{\text{asym}}^0, t^1, s_X^0 \rangle$ | 10.01% | 0.000  | 0.000  | 0.000  |
|        |       |        |        |        | $\langle 1497   R^0, b^1, s_{\text{sym}}^0, s_{\text{asym}}^1, t^0, s_X^0 \rangle$ | 3.14%  | 0.000  | 0.000  | -0.005 |
|        |       |        |        |        | $\langle 1497   R^2, b^0, s_{\text{sym}}^0, s_{\text{asym}}^1, t^0, s_X^0 \rangle$ | 0.07%  | 0.000  | 0.000  | -0.001 |
|        |       |        |        |        | $\langle 1497   R^0, b^0, s_{\text{sym}}^0, s_{\text{asym}}^1, t^0, s_X^0 \rangle$ | 0.01%  | 0.000  | 0.000  | 0.004  |
| 4738.7 | 0.121 | -0.001 | 0.003  | -0.000 | $\langle 1522   R^0, b^1, s_{\text{sym}}^1, s_{\text{asym}}^0, t^0, s_X^0 \rangle$ | 29.64% | -0.001 | -0.005 | 0.000  |
|        |       |        |        |        | $\langle 1522   R^5, b^0, s_{\text{sym}}^0, s_{\text{asym}}^0, t^0, s_X^0 \rangle$ | 15.19% | 0.002  | 0.000  | 0.000  |
|        |       |        |        |        | $\langle 1522   R^0, b^3, s_{\text{sym}}^0, s_{\text{asym}}^0, t^0, s_X^0 \rangle$ | 8.38%  | 0.000  | -0.002 | 0.000  |
|        |       |        |        |        | $\langle 1522   R^2, b^0, s_{\text{sym}}^1, s_{\text{asym}}^0, t^0, s_X^0 \rangle$ | 6.80%  | -0.005 | -0.005 | 0.000  |
|        |       |        |        |        | $\langle 1522   R^0, b^0, s_{\text{sym}}^1, s_{\text{asym}}^0, t^0, s_X^0 \rangle$ | 0.15%  | -0.001 | 0.013  | 0.000  |
| 4757.8 | 0.056 | 0.001  | -0.002 | 0.000  | $\langle 1542   R^5, b^0, s_{\text{sym}}^0, s_{\text{asym}}^0, t^0, s_X^0 \rangle$ | 34.53% | 0.003  | 0.000  | 0.000  |
|        |       |        |        |        | $\langle 1542   R^0, b^1, s_{\text{sym}}^1, s_{\text{asym}}^0, t^0, s_X^0 \rangle$ | 18.83% | 0.001  | 0.004  | 0.000  |
|        |       |        |        |        | $\langle 1542   R^3, b^1, s_{\text{sym}}^0, s_{\text{asym}}^0, t^0, s_X^0 \rangle$ | 6.23%  | 0.000  | 0.000  | 0.000  |
|        |       |        |        |        | $\langle 1542   R^3, b^0, s_{\text{sym}}^0, s_{\text{asym}}^0, t^0, s_X^0 \rangle$ | 1.35%  | -0.004 | 0.000  | 0.000  |
|        |       |        |        |        | $\langle 1542   R^0, b^0, s_{\text{sym}}^1, s_{\text{asym}}^0, t^0, s_X^0 \rangle$ | 0.02%  | 0.000  | -0.005 | 0.000  |
| 4778.9 | 0.151 | 0.000  | -0.000 | -0.004 | $\langle 1565   R^1, b^0, s_{\text{sym}}^1, s_{\text{asym}}^0, t^2, s_X^0 \rangle$ | 33.87% | 0.000  | 0.000  | 0.000  |
|        |       |        |        |        | $\langle 1565   R^1, b^2, s_{\text{sym}}^0, s_{\text{asym}}^0, t^2, s_X^0 \rangle$ | 7.69%  | 0.000  | 0.000  | 0.000  |
|        |       |        |        |        | $\langle 1565   R^2, b^1, s_{\text{sym}}^0, s_{\text{asym}}^0, t^3, s_X^0 \rangle$ | 5.54%  | 0.000  | 0.000  | 0.000  |
|        |       |        |        |        | $\langle 1565   R^0, b^1, s_{\text{sym}}^0, s_{\text{asym}}^1, t^0, s_X^0 \rangle$ | 3.95%  | 0.000  | 0.000  | -0.006 |
|        |       |        |        |        | $\langle 1565   R^2, b^0, s_{\text{sym}}^0, s_{\text{asym}}^1, t^0, s_X^0 \rangle$ | 1.77%  | 0.000  | 0.000  | -0.004 |
|        |       |        |        |        | $\langle 1565   R^0, b^0, s_{\text{sym}}^0, s_{\text{asym}}^1, t^0, s_X^0 \rangle$ | 0.01%  | 0.000  | 0.000  | 0.005  |
| 4785.7 | 1.085 | 0.000  | -0.000 | -0.010 | $\langle 1575   R^0, b^1, s_{\text{sym}}^0, s_{\text{asym}}^1, t^0, s_X^0 \rangle$ | 28.20% | 0.000  | 0.000  | -0.016 |
|        |       |        |        |        | $\langle 1575   R^2, b^0, s_{\text{sym}}^0, s_{\text{asym}}^1, t^0, s_X^0 \rangle$ | 11.51% | 0.000  | 0.000  | -0.010 |
|        |       |        |        |        | $\langle 1575   R^1, b^2, s_{\text{sym}}^0, s_{\text{asym}}^0, t^0, s_X^0 \rangle$ | 9.24%  | 0.000  | 0.000  | 0.000  |
|        |       |        |        |        | $\langle 1575   R^1, b^0, s_{\text{sym}}^1, s_{\text{asym}}^0, t^2, s_X^0 \rangle$ | 5.20%  | 0.000  | 0.000  | 0.000  |
|        |       |        |        |        | $\langle 1575   R^0, b^0, s_{\text{sym}}^0, s_{\text{asym}}^1, t^0, s_X^0 \rangle$ | 0.06%  | 0.000  | 0.000  | 0.012  |
| 4787.4 | 0.109 | 0.000  | -0.000 | -0.003 | $\langle 1577   R^1, b^0, s_{\text{sym}}^1, s_{\text{asym}}^0, t^2, s_X^0 \rangle$ | 52.47% | 0.000  | 0.000  | 0.000  |
|        |       |        |        |        | $\langle 1577   R^1, b^2, s_{\text{sym}}^0, s_{\text{asym}}^0, t^2, s_X^0 \rangle$ | 6.93%  | 0.000  | 0.000  | 0.000  |
|        |       |        |        |        | $\langle 1577   R^0, b^1, s_{\text{sym}}^0, s_{\text{asym}}^1, t^0, s_X^0 \rangle$ | 3.00%  | 0.000  | 0.000  | -0.005 |
|        |       |        |        |        | $\langle 1577   R^2, b^0, s_{\text{sym}}^0, s_{\text{asym}}^1, t^0, s_X^0 \rangle$ | 1.19%  | 0.000  | 0.000  | -0.003 |
|        |       |        |        |        | $\langle 1577   R^0, b^0, s_{\text{sym}}^0, s_{\text{asym}}^1, t^0, s_X^0 \rangle$ | 0.01%  | 0.000  | 0.000  | 0.004  |
| 4871.7 | 0.091 | 0.000  | -0.000 | -0.003 | $\langle 1664   R^4, b^0, s_{\text{sym}}^0, s_{\text{asym}}^0, t^0, s_X^0 \rangle$ | 70.29% | 0.000  | 0.000  | 0.000  |
|        |       |        |        |        | $\langle 1664   R^0, b^1, s_{\text{sym}}^0, s_{\text{asym}}^1, t^0, s_X^0 \rangle$ | 1.15%  | 0.000  | 0.000  | -0.003 |
|        |       |        |        |        | $\langle 1664   R^2, b^0, s_{\text{sym}}^0, s_{\text{asym}}^1, t^0, s_X^0 \rangle$ | 0.66%  | 0.000  | 0.000  | 0.002  |

|        |       |        |        |        |                                                                                    |        |        |        |        |
|--------|-------|--------|--------|--------|------------------------------------------------------------------------------------|--------|--------|--------|--------|
|        |       |        |        |        | $\langle 1664   R^0, b^0, s_{\text{sym}}^0, s_{\text{asym}}^1, t^0, s_X^0 \rangle$ | 0.00%  | 0.000  | 0.000  | -0.003 |
| 4885.5 | 0.354 | 0.000  | -0.000 | -0.005 | $\langle 1681   R^1, b^0, s_{\text{sym}}^1, s_{\text{asym}}^0, t^5, s_X^0 \rangle$ | 22.77% | 0.000  | 0.000  | 0.000  |
|        |       |        |        |        | $\langle 1681   R^1, b^2, s_{\text{sym}}^0, s_{\text{asym}}^0, t^4, s_X^0 \rangle$ | 12.05% | 0.000  | 0.000  | 0.000  |
|        |       |        |        |        | $\langle 1681   R^2, b^0, s_{\text{sym}}^0, s_{\text{asym}}^1, t^0, s_X^0 \rangle$ | 5.87%  | 0.000  | 0.000  | 0.007  |
|        |       |        |        |        | $\langle 1681   R^0, b^1, s_{\text{sym}}^0, s_{\text{asym}}^1, t^0, s_X^0 \rangle$ | 2.90%  | 0.000  | 0.000  | -0.005 |
|        |       |        |        |        | $\langle 1681   R^0, b^0, s_{\text{sym}}^0, s_{\text{asym}}^1, t^0, s_X^0 \rangle$ | 0.01%  | 0.000  | 0.000  | -0.005 |
| 4886.1 | 0.648 | -0.000 | 0.000  | 0.007  | $\langle 1682   R^1, b^0, s_{\text{sym}}^1, s_{\text{asym}}^0, t^5, s_X^0 \rangle$ | 13.92% | 0.000  | 0.000  | 0.000  |
|        |       |        |        |        | $\langle 1682   R^2, b^0, s_{\text{sym}}^0, s_{\text{asym}}^1, t^0, s_X^0 \rangle$ | 10.44% | 0.000  | 0.000  | -0.009 |
|        |       |        |        |        | $\langle 1682   R^1, b^2, s_{\text{sym}}^0, s_{\text{asym}}^0, t^4, s_X^0 \rangle$ | 7.10%  | 0.000  | 0.000  | 0.000  |
|        |       |        |        |        | $\langle 1682   R^1, b^2, s_{\text{sym}}^0, s_{\text{asym}}^0, t^2, s_X^0 \rangle$ | 5.71%  | 0.000  | 0.000  | 0.000  |
|        |       |        |        |        | $\langle 1682   R^0, b^1, s_{\text{sym}}^0, s_{\text{asym}}^1, t^0, s_X^0 \rangle$ | 5.39%  | 0.000  | 0.000  | 0.007  |
|        |       |        |        |        | $\langle 1682   R^0, b^0, s_{\text{sym}}^0, s_{\text{asym}}^1, t^0, s_X^0 \rangle$ | 0.02%  | 0.000  | 0.000  | 0.006  |
| 4890.8 | 0.268 | 0.000  | -0.000 | -0.005 | $\langle 1685   R^3, b^1, s_{\text{sym}}^0, s_{\text{asym}}^0, t^2, s_X^0 \rangle$ | 45.03% | 0.000  | 0.000  | 0.000  |
|        |       |        |        |        | $\langle 1685   R^1, b^2, s_{\text{sym}}^0, s_{\text{asym}}^0, t^2, s_X^0 \rangle$ | 5.26%  | 0.000  | 0.000  | 0.000  |
|        |       |        |        |        | $\langle 1685   R^2, b^0, s_{\text{sym}}^0, s_{\text{asym}}^1, t^0, s_X^0 \rangle$ | 4.34%  | 0.000  | 0.000  | 0.006  |
|        |       |        |        |        | $\langle 1685   R^0, b^1, s_{\text{sym}}^0, s_{\text{asym}}^1, t^0, s_X^0 \rangle$ | 2.38%  | 0.000  | 0.000  | -0.005 |
|        |       |        |        |        | $\langle 1685   R^0, b^0, s_{\text{sym}}^0, s_{\text{asym}}^1, t^0, s_X^0 \rangle$ | 0.01%  | 0.000  | 0.000  | -0.004 |
| 4899.3 | 0.053 | 0.000  | -0.000 | 0.002  | $\langle 1704   R^1, b^2, s_{\text{sym}}^0, s_{\text{asym}}^0, t^2, s_X^0 \rangle$ | 29.81% | 0.000  | 0.000  | 0.000  |
|        |       |        |        |        | $\langle 1704   R^3, b^1, s_{\text{sym}}^0, s_{\text{asym}}^0, t^2, s_X^0 \rangle$ | 9.08%  | 0.000  | 0.000  | 0.000  |
|        |       |        |        |        | $\langle 1704   R^0, b^1, s_{\text{sym}}^1, s_{\text{asym}}^0, t^1, s_X^0 \rangle$ | 7.58%  | 0.000  | 0.000  | 0.000  |
|        |       |        |        |        | $\langle 1704   R^0, b^1, s_{\text{sym}}^0, s_{\text{asym}}^1, t^0, s_X^0 \rangle$ | 0.64%  | 0.000  | 0.000  | 0.002  |
|        |       |        |        |        | $\langle 1704   R^2, b^0, s_{\text{sym}}^0, s_{\text{asym}}^1, t^0, s_X^0 \rangle$ | 0.10%  | 0.000  | 0.000  | -0.001 |
|        |       |        |        |        | $\langle 1704   R^0, b^0, s_{\text{sym}}^0, s_{\text{asym}}^1, t^1, s_X^0 \rangle$ | 0.00%  | 0.000  | 0.000  | -0.001 |
| 4901.4 | 0.065 | 0.001  | -0.002 | 0.000  | $\langle 1707   R^0, b^3, s_{\text{sym}}^0, s_{\text{asym}}^0, t^0, s_X^0 \rangle$ | 23.91% | 0.000  | -0.003 | 0.000  |
|        |       |        |        |        | $\langle 1707   R^2, b^2, s_{\text{sym}}^0, s_{\text{asym}}^0, t^0, s_X^0 \rangle$ | 7.80%  | 0.000  | -0.001 | 0.000  |
|        |       |        |        |        | $\langle 1707   R^0, b^1, s_{\text{sym}}^0, s_{\text{asym}}^1, t^1, s_X^0 \rangle$ | 5.43%  | 0.000  | 0.000  | 0.000  |
|        |       |        |        |        | $\langle 1707   R^1, b^2, s_{\text{sym}}^0, s_{\text{asym}}^0, t^1, s_X^0 \rangle$ | 5.26%  | 0.000  | 0.000  | 0.000  |
|        |       |        |        |        | $\langle 1707   R^2, b^0, s_{\text{sym}}^1, s_{\text{asym}}^0, t^0, s_X^0 \rangle$ | 5.15%  | 0.004  | 0.005  | 0.000  |
|        |       |        |        |        | $\langle 1707   R^0, b^0, s_{\text{sym}}^1, s_{\text{asym}}^0, t^0, s_X^0 \rangle$ | 0.04%  | 0.000  | -0.006 | 0.000  |
|        |       |        |        |        | $\langle 1707   R^1, b^0, s_{\text{sym}}^0, s_{\text{asym}}^0, t^0, s_X^0 \rangle$ | 0.01%  | -0.003 | 0.000  | 0.000  |
| 4904.3 | 0.246 | 0.000  | -0.000 | -0.004 | $\langle 1712   R^1, b^0, s_{\text{sym}}^1, s_{\text{asym}}^0, t^5, s_X^0 \rangle$ | 17.52% | 0.000  | 0.000  | 0.000  |
|        |       |        |        |        | $\langle 1712   R^1, b^0, s_{\text{sym}}^0, s_{\text{asym}}^1, t^4, s_X^0 \rangle$ | 14.70% | 0.000  | 0.000  | 0.000  |
|        |       |        |        |        | $\langle 1712   R^1, b^2, s_{\text{sym}}^0, s_{\text{asym}}^0, t^2, s_X^0 \rangle$ | 6.08%  | 0.000  | 0.000  | 0.000  |
|        |       |        |        |        | $\langle 1712   R^1, b^0, s_{\text{sym}}^0, s_{\text{asym}}^1, t^5, s_X^0 \rangle$ | 5.49%  | 0.000  | 0.000  | 0.000  |
|        |       |        |        |        | $\langle 1712   R^0, b^1, s_{\text{sym}}^0, s_{\text{asym}}^1, t^0, s_X^0 \rangle$ | 2.72%  | 0.000  | 0.000  | -0.005 |
|        |       |        |        |        | $\langle 1712   R^2, b^0, s_{\text{sym}}^0, s_{\text{asym}}^1, t^0, s_X^0 \rangle$ | 1.29%  | 0.000  | 0.000  | 0.003  |
|        |       |        |        |        | $\langle 1712   R^0, b^0, s_{\text{sym}}^0, s_{\text{asym}}^1, t^0, s_X^0 \rangle$ | 0.00%  | 0.000  | 0.000  | -0.002 |
| 4905.1 | 0.613 | -0.000 | 0.000  | 0.007  | $\langle 1713   R^1, b^2, s_{\text{sym}}^0, s_{\text{asym}}^0, t^2, s_X^0 \rangle$ | 18.59% | 0.000  | 0.000  | 0.000  |
|        |       |        |        |        | $\langle 1713   R^0, b^1, s_{\text{sym}}^1, s_{\text{asym}}^0, t^1, s_X^0 \rangle$ | 8.02%  | 0.000  | 0.000  | 0.000  |
|        |       |        |        |        | $\langle 1713   R^1, b^0, s_{\text{sym}}^1, s_{\text{asym}}^0, t^5, s_X^0 \rangle$ | 7.48%  | 0.000  | 0.000  | 0.000  |
|        |       |        |        |        | $\langle 1713   R^0, b^1, s_{\text{sym}}^0, s_{\text{asym}}^1, t^0, s_X^0 \rangle$ | 6.75%  | 0.000  | 0.000  | 0.008  |
|        |       |        |        |        | $\langle 1713   R^2, b^0, s_{\text{sym}}^0, s_{\text{asym}}^1, t^0, s_X^0 \rangle$ | 3.07%  | 0.000  | 0.000  | -0.005 |

|        |       |        |        |        |                                                                                    |        |        |        |        |
|--------|-------|--------|--------|--------|------------------------------------------------------------------------------------|--------|--------|--------|--------|
|        |       |        |        |        | $\langle 1713   R^0, b^0, s_{\text{sym}}^0, s_{\text{asym}}^1, t^0, s_X^0 \rangle$ | 0.00%  | 0.000  | 0.000  | 0.003  |
| 4917.0 | 0.083 | -0.000 | 0.000  | 0.003  | $\langle 1726   R^3, b^1, s_{\text{sym}}^0, s_{\text{asym}}^0, t^1, s_X^0 \rangle$ | 43.81% | 0.000  | 0.000  | 0.000  |
|        |       |        |        |        | $\langle 1726   R^2, b^0, s_{\text{sym}}^0, s_{\text{asym}}^1, t^1, s_X^0 \rangle$ | 13.53% | 0.000  | 0.000  | -0.001 |
|        |       |        |        |        | $\langle 1726   R^1, b^2, s_{\text{sym}}^0, s_{\text{asym}}^0, t^1, s_X^0 \rangle$ | 7.15%  | 0.000  | 0.000  | 0.000  |
|        |       |        |        |        | $\langle 1726   R^2, b^0, s_{\text{sym}}^0, s_{\text{asym}}^1, t^0, s_X^0 \rangle$ | 0.58%  | 0.000  | 0.000  | -0.002 |
|        |       |        |        |        | $\langle 1726   R^0, b^1, s_{\text{sym}}^0, s_{\text{asym}}^1, t^0, s_X^0 \rangle$ | 0.57%  | 0.000  | 0.000  | 0.002  |
|        |       |        |        |        | $\langle 1726   R^0, b^0, s_{\text{sym}}^0, s_{\text{asym}}^1, t^0, s_X^0 \rangle$ | 0.00%  | 0.000  | 0.000  | 0.003  |
| 4940.2 | 0.218 | 0.000  | -0.000 | -0.004 | $\langle 1764   R^0, b^1, s_{\text{sym}}^0, s_{\text{asym}}^1, t^1, s_X^0 \rangle$ | 31.45% | 0.000  | 0.000  | 0.000  |
|        |       |        |        |        | $\langle 1764   R^1, b^2, s_{\text{sym}}^0, s_{\text{asym}}^0, t^1, s_X^0 \rangle$ | 8.61%  | 0.000  | 0.000  | 0.000  |
|        |       |        |        |        | $\langle 1764   R^0, b^1, s_{\text{sym}}^0, s_{\text{asym}}^1, t^0, s_X^0 \rangle$ | 1.69%  | 0.000  | 0.000  | -0.004 |
|        |       |        |        |        | $\langle 1764   R^2, b^0, s_{\text{sym}}^0, s_{\text{asym}}^1, t^0, s_X^0 \rangle$ | 0.52%  | 0.000  | 0.000  | 0.002  |
|        |       |        |        |        | $\langle 1764   R^0, b^0, s_{\text{sym}}^0, s_{\text{asym}}^1, t^0, s_X^0 \rangle$ | 0.00%  | 0.000  | 0.000  | -0.002 |
| 4987.6 | 0.078 | 0.000  | 0.000  | -0.003 | $\langle 1810   R^5, b^0, s_{\text{sym}}^0, s_{\text{asym}}^0, t^0, s_X^0 \rangle$ | 44.89% | 0.000  | 0.000  | 0.000  |
|        |       |        |        |        | $\langle 1810   R^3, b^1, s_{\text{sym}}^0, s_{\text{asym}}^0, t^0, s_X^0 \rangle$ | 13.85% | 0.000  | 0.000  | 0.000  |
|        |       |        |        |        | $\langle 1810   R^2, b^0, s_{\text{sym}}^0, s_{\text{asym}}^1, t^0, s_X^0 \rangle$ | 2.77%  | 0.000  | 0.000  | 0.005  |
|        |       |        |        |        | $\langle 1810   R^0, b^0, s_{\text{sym}}^1, s_{\text{asym}}^1, t^0, s_X^0 \rangle$ | 0.06%  | 0.000  | 0.000  | -0.002 |
|        |       |        |        |        | $\langle 1810   R^0, b^0, s_{\text{sym}}^0, s_{\text{asym}}^1, t^0, s_X^0 \rangle$ | 0.00%  | 0.000  | 0.000  | -0.002 |
| 4993.4 | 0.075 | -0.000 | -0.000 | -0.002 | $\langle 1816   R^5, b^0, s_{\text{sym}}^0, s_{\text{asym}}^0, t^1, s_X^0 \rangle$ | 52.18% | 0.000  | 0.000  | 0.000  |
|        |       |        |        |        | $\langle 1816   R^2, b^0, s_{\text{sym}}^1, s_{\text{asym}}^0, t^1, s_X^0 \rangle$ | 13.57% | 0.000  | 0.000  | 0.003  |
|        |       |        |        |        | $\langle 1816   R^2, b^0, s_{\text{sym}}^0, s_{\text{asym}}^1, t^0, s_X^0 \rangle$ | 1.45%  | 0.000  | 0.000  | 0.003  |
|        |       |        |        |        | $\langle 1816   R^0, b^0, s_{\text{sym}}^0, s_{\text{asym}}^0, t^1, s_X^0 \rangle$ | 0.01%  | 0.000  | 0.000  | -0.003 |
| 5504.7 | 0.242 | 0.000  | -0.000 | -0.004 | $\langle 2491   R^0, b^0, s_{\text{sym}}^1, s_{\text{asym}}^0, t^0, s_X^1 \rangle$ | 57.33% | 0.000  | 0.000  | -0.006 |
|        |       |        |        |        | $\langle 2491   R^0, b^2, s_{\text{sym}}^0, s_{\text{asym}}^0, t^0, s_X^1 \rangle$ | 8.43%  | 0.000  | 0.000  | 0.000  |
|        |       |        |        |        | $\langle 2491   R^1, b^1, s_{\text{sym}}^0, s_{\text{asym}}^0, t^3, s_X^1 \rangle$ | 6.75%  | 0.000  | 0.000  | 0.000  |
|        |       |        |        |        | $\langle 2491   R^0, b^0, s_{\text{sym}}^0, s_{\text{asym}}^0, t^0, s_X^1 \rangle$ | 0.05%  | 0.000  | 0.000  | 0.002  |
|        |       |        |        |        | $\langle 2491   R^0, b^0, s_{\text{sym}}^0, s_{\text{asym}}^1, t^0, s_X^0 \rangle$ | 0.00%  | 0.000  | 0.000  | 0.002  |
| 5504.9 | 0.057 | 0.000  | -0.000 | -0.002 | $\langle 2492   R^1, b^1, s_{\text{sym}}^0, s_{\text{asym}}^0, t^3, s_X^1 \rangle$ | 64.53% | 0.000  | 0.000  | 0.000  |
|        |       |        |        |        | $\langle 2492   R^0, b^0, s_{\text{sym}}^1, s_{\text{asym}}^0, t^0, s_X^1 \rangle$ | 10.70% | 0.000  | 0.000  | -0.003 |
|        |       |        |        |        | $\langle 2492   R^0, b^0, s_{\text{sym}}^0, s_{\text{asym}}^0, t^0, s_X^1 \rangle$ | 0.01%  | 0.000  | 0.000  | 0.001  |
|        |       |        |        |        | $\langle 2492   R^0, b^0, s_{\text{sym}}^0, s_{\text{asym}}^1, t^0, s_X^0 \rangle$ | 0.00%  | 0.000  | 0.000  | 0.001  |
| 5510.7 | 0.078 | 0.000  | -0.002 | -0.000 | $\langle 2502   R^0, b^0, s_{\text{sym}}^1, s_{\text{asym}}^0, t^0, s_X^1 \rangle$ | 48.98% | 0.001  | -0.012 | 0.000  |
|        |       |        |        |        | $\langle 2502   R^3, b^0, s_{\text{sym}}^0, s_{\text{asym}}^0, t^2, s_X^1 \rangle$ | 12.68% | 0.000  | 0.000  | 0.000  |
|        |       |        |        |        | $\langle 2502   R^0, b^2, s_{\text{sym}}^0, s_{\text{asym}}^0, t^0, s_X^1 \rangle$ | 7.47%  | 0.000  | 0.000  | 0.000  |
|        |       |        |        |        | $\langle 2502   R^0, b^0, s_{\text{sym}}^1, s_{\text{asym}}^0, t^0, s_X^0 \rangle$ | 0.07%  | -0.001 | 0.009  | 0.000  |
|        |       |        |        |        | $\langle 2502   R^0, b^0, s_{\text{sym}}^0, s_{\text{asym}}^0, t^0, s_X^1 \rangle$ | 0.04%  | 0.000  | 0.001  | 0.000  |
| 5529.2 | 0.079 | 0.000  | -0.002 | 0.000  | $\langle 2532   R^0, b^0, s_{\text{sym}}^0, s_{\text{asym}}^1, t^0, s_X^1 \rangle$ | 23.87% | 0.000  | -0.002 | 0.000  |
|        |       |        |        |        | $\langle 2532   R^1, b^1, s_{\text{sym}}^0, s_{\text{asym}}^0, t^3, s_X^1 \rangle$ | 18.81% | 0.000  | 0.000  | 0.000  |
|        |       |        |        |        | $\langle 2532   R^3, b^0, s_{\text{sym}}^0, s_{\text{asym}}^0, t^1, s_X^1 \rangle$ | 17.41% | 0.000  | 0.000  | 0.000  |
|        |       |        |        |        | $\langle 2532   R^0, b^0, s_{\text{sym}}^0, s_{\text{asym}}^2, t^0, s_X^0 \rangle$ | 0.01%  | 0.000  | -0.001 | 0.000  |
|        |       |        |        |        | $\langle 2532   R^0, b^0, s_{\text{sym}}^1, s_{\text{asym}}^0, t^0, s_X^0 \rangle$ | 0.00%  | 0.000  | 0.002  | 0.000  |
| 5532.4 | 0.136 | 0.000  | 0.000  | -0.003 | $\langle 2537   R^3, b^0, s_{\text{sym}}^0, s_{\text{asym}}^0, t^1, s_X^1 \rangle$ | 41.12% | 0.000  | 0.000  | 0.000  |
|        |       |        |        |        | $\langle 2537   R^0, b^0, s_{\text{sym}}^0, s_{\text{asym}}^1, t^0, s_X^1 \rangle$ | 15.08% | 0.000  | 0.000  | -0.011 |

|        |       |        |        |        |                                                                                    |        |        |        |        |
|--------|-------|--------|--------|--------|------------------------------------------------------------------------------------|--------|--------|--------|--------|
|        |       |        |        |        | $\langle 2537   R^0, b^0, s_{\text{sym}}^1, s_{\text{asym}}^1, t^0, s_X^1 \rangle$ | 0.93%  | 0.000  | 0.000  | -0.001 |
|        |       |        |        |        | $\langle 2537   R^0, b^0, s_{\text{sym}}^0, s_{\text{asym}}^1, t^0, s_X^0 \rangle$ | 0.02%  | 0.000  | 0.000  | 0.008  |
| 5532.5 | 0.074 | -0.000 | 0.002  | -0.000 | $\langle 2538   R^3, b^0, s_{\text{sym}}^0, s_{\text{asym}}^0, t^1, s_X^1 \rangle$ | 41.85% | 0.000  | 0.000  | 0.000  |
|        |       |        |        |        | $\langle 2538   R^0, b^0, s_{\text{sym}}^0, s_{\text{asym}}^1, t^0, s_X^1 \rangle$ | 22.82% | 0.000  | 0.002  | 0.000  |
|        |       |        |        |        | $\langle 2538   R^0, b^0, s_{\text{sym}}^1, s_{\text{asym}}^0, t^0, s_X^0 \rangle$ | 0.00%  | 0.000  | -0.001 | 0.000  |
|        |       |        |        |        | $\langle 2538   R^1, b^0, s_{\text{sym}}^0, s_{\text{asym}}^0, t^0, s_X^0 \rangle$ | 0.00%  | 0.000  | 0.000  | 0.000  |
| 5536.0 | 0.362 | -0.000 | 0.000  | -0.005 | $\langle 2539   R^0, b^0, s_{\text{sym}}^0, s_{\text{asym}}^1, t^0, s_X^1 \rangle$ | 42.07% | 0.000  | 0.000  | -0.018 |
|        |       |        |        |        | $\langle 2539   R^3, b^0, s_{\text{sym}}^0, s_{\text{asym}}^0, t^1, s_X^1 \rangle$ | 19.61% | 0.000  | 0.000  | 0.000  |
|        |       |        |        |        | $\langle 2539   R^1, b^1, s_{\text{sym}}^0, s_{\text{asym}}^0, t^0, s_X^1 \rangle$ | 7.09%  | 0.000  | 0.000  | 0.000  |
|        |       |        |        |        | $\langle 2539   R^0, b^0, s_{\text{sym}}^1, s_{\text{asym}}^1, t^0, s_X^1 \rangle$ | 2.53%  | 0.000  | 0.000  | -0.001 |
|        |       |        |        |        | $\langle 2539   R^0, b^0, s_{\text{sym}}^0, s_{\text{asym}}^1, t^0, s_X^0 \rangle$ | 0.07%  | 0.000  | 0.000  | 0.013  |
| 6029.7 | 0.827 | 0.000  | -0.000 | -0.007 | $\langle 3337   R^1, b^1, s_{\text{sym}}^1, s_{\text{asym}}^0, t^0, s_X^0 \rangle$ | 16.18% | 0.000  | 0.000  | 0.000  |
|        |       |        |        |        | $\langle 3337   R^0, b^0, s_{\text{sym}}^1, s_{\text{asym}}^1, t^0, s_X^0 \rangle$ | 15.16% | 0.000  | 0.000  | 0.037  |
|        |       |        |        |        | $\langle 3337   R^0, b^0, s_{\text{sym}}^0, s_{\text{asym}}^1, t^0, s_X^0 \rangle$ | 1.27%  | 0.000  | 0.000  | -0.055 |
|        |       |        |        |        | $\langle 3337   R^0, b^0, s_{\text{sym}}^1, s_{\text{asym}}^3, t^0, s_X^0 \rangle$ | 0.49%  | 0.000  | 0.000  | 0.003  |
| 6035.2 | 0.114 | -0.000 | 0.000  | 0.003  | $\langle 3347   R^2, b^0, s_{\text{sym}}^0, s_{\text{asym}}^1, t^1, s_X^0 \rangle$ | 44.60% | 0.000  | 0.000  | 0.000  |
|        |       |        |        |        | $\langle 3347   R^3, b^1, s_{\text{sym}}^0, s_{\text{asym}}^0, t^1, s_X^0 \rangle$ | 5.93%  | 0.000  | 0.000  | 0.000  |
|        |       |        |        |        | $\langle 3347   R^0, b^0, s_{\text{sym}}^1, s_{\text{asym}}^1, t^0, s_X^0 \rangle$ | 2.42%  | 0.000  | 0.000  | -0.015 |
|        |       |        |        |        | $\langle 3347   R^2, b^0, s_{\text{sym}}^0, s_{\text{asym}}^1, t^0, s_X^0 \rangle$ | 0.27%  | 0.000  | 0.000  | -0.002 |
|        |       |        |        |        | $\langle 3347   R^0, b^0, s_{\text{sym}}^0, s_{\text{asym}}^1, t^0, s_X^0 \rangle$ | 0.20%  | 0.000  | 0.000  | 0.022  |
| 6057.4 | 0.077 | -0.001 | 0.002  | -0.000 | $\langle 3387   R^2, b^2, s_{\text{sym}}^0, s_{\text{asym}}^0, t^2, s_X^0 \rangle$ | 58.12% | 0.000  | 0.000  | 0.000  |
|        |       |        |        |        | $\langle 3387   R^0, b^0, s_{\text{sym}}^0, s_{\text{asym}}^2, t^0, s_X^0 \rangle$ | 1.66%  | 0.000  | -0.005 | 0.000  |
|        |       |        |        |        | $\langle 3387   R^0, b^0, s_{\text{sym}}^1, s_{\text{asym}}^2, t^0, s_X^0 \rangle$ | 0.64%  | 0.000  | -0.002 | 0.000  |
|        |       |        |        |        | $\langle 3387   R^0, b^0, s_{\text{sym}}^1, s_{\text{asym}}^0, t^0, s_X^0 \rangle$ | 0.11%  | -0.001 | 0.011  | 0.000  |
| 6058.0 | 0.465 | 0.002  | -0.005 | 0.000  | $\langle 3388   R^2, b^1, s_{\text{sym}}^0, s_{\text{asym}}^0, t^0, s_X^1 \rangle$ | 12.04% | 0.000  | 0.000  | 0.000  |
|        |       |        |        |        | $\langle 3388   R^0, b^0, s_{\text{sym}}^0, s_{\text{asym}}^2, t^0, s_X^0 \rangle$ | 10.06% | -0.001 | 0.013  | 0.000  |
|        |       |        |        |        | $\langle 3388   R^1, b^1, s_{\text{sym}}^0, s_{\text{asym}}^1, t^0, s_X^0 \rangle$ | 8.14%  | 0.000  | 0.000  | 0.000  |
|        |       |        |        |        | $\langle 3388   R^2, b^2, s_{\text{sym}}^0, s_{\text{asym}}^0, t^2, s_X^0 \rangle$ | 6.83%  | 0.000  | 0.000  | 0.000  |
|        |       |        |        |        | $\langle 3388   R^0, b^0, s_{\text{sym}}^2, s_{\text{asym}}^0, t^0, s_X^0 \rangle$ | 6.06%  | 0.000  | 0.000  | 0.000  |
|        |       |        |        |        | $\langle 3388   R^0, b^0, s_{\text{sym}}^1, s_{\text{asym}}^2, t^0, s_X^0 \rangle$ | 3.89%  | -0.001 | 0.004  | 0.000  |
|        |       |        |        |        | $\langle 3388   R^0, b^0, s_{\text{sym}}^1, s_{\text{asym}}^0, t^0, s_X^0 \rangle$ | 0.69%  | 0.002  | -0.027 | 0.000  |
| 6058.2 | 0.102 | 0.001  | -0.002 | 0.000  | $\langle 3389   R^2, b^1, s_{\text{sym}}^0, s_{\text{asym}}^0, t^0, s_X^1 \rangle$ | 54.36% | 0.000  | 0.000  | 0.000  |
|        |       |        |        |        | $\langle 3389   R^0, b^0, s_{\text{sym}}^0, s_{\text{asym}}^2, t^0, s_X^0 \rangle$ | 2.21%  | -0.001 | 0.006  | 0.000  |
|        |       |        |        |        | $\langle 3389   R^0, b^0, s_{\text{sym}}^1, s_{\text{asym}}^2, t^0, s_X^0 \rangle$ | 0.85%  | 0.000  | 0.002  | 0.000  |
|        |       |        |        |        | $\langle 3389   R^0, b^0, s_{\text{sym}}^1, s_{\text{asym}}^0, t^0, s_X^0 \rangle$ | 0.15%  | 0.001  | -0.013 | 0.000  |
| 6072.0 | 0.058 | 0.000  | -0.000 | 0.002  | $\langle 3405   R^4, b^1, s_{\text{sym}}^0, s_{\text{asym}}^0, t^1, s_X^0 \rangle$ | 28.63% | 0.000  | 0.000  | 0.000  |
|        |       |        |        |        | $\langle 3405   R^2, b^2, s_{\text{sym}}^0, s_{\text{asym}}^0, t^1, s_X^0 \rangle$ | 5.83%  | 0.000  | 0.000  | 0.000  |
|        |       |        |        |        | $\langle 3405   R^0, b^0, s_{\text{sym}}^1, s_{\text{asym}}^1, t^0, s_X^0 \rangle$ | 1.20%  | 0.000  | 0.000  | -0.010 |
|        |       |        |        |        | $\langle 3405   R^2, b^0, s_{\text{sym}}^0, s_{\text{asym}}^1, t^0, s_X^0 \rangle$ | 0.18%  | 0.000  | 0.000  | 0.001  |
|        |       |        |        |        | $\langle 3405   R^0, b^0, s_{\text{sym}}^0, s_{\text{asym}}^1, t^0, s_X^0 \rangle$ | 0.07%  | 0.000  | 0.000  | 0.013  |
| 6082.7 | 0.068 | 0.000  | -0.000 | 0.002  | $\langle 3425   R^2, b^2, s_{\text{sym}}^0, s_{\text{asym}}^0, t^1, s_X^0 \rangle$ | 26.46% | 0.000  | 0.000  | 0.000  |
|        |       |        |        |        | $\langle 3425   R^4, b^1, s_{\text{sym}}^0, s_{\text{asym}}^0, t^1, s_X^0 \rangle$ | 9.32%  | 0.000  | 0.000  | 0.000  |

|        |       |        |        |        |                                                                                    |        |        |        |        |
|--------|-------|--------|--------|--------|------------------------------------------------------------------------------------|--------|--------|--------|--------|
|        |       |        |        |        | $\langle 3425   R^3, b^0, s_{\text{sym}}^0, s_{\text{asym}}^1, t^1, s_X^0 \rangle$ | 6.51%  | 0.000  | 0.000  | 0.000  |
|        |       |        |        |        | $\langle 3425   R^0, b^0, s_{\text{sym}}^1, s_{\text{asym}}^1, t^0, s_X^0 \rangle$ | 1.37%  | 0.000  | 0.000  | -0.011 |
|        |       |        |        |        | $\langle 3425   R^0, b^0, s_{\text{sym}}^0, s_{\text{asym}}^2, t^1, s_X^0 \rangle$ | 0.39%  | 0.000  | 0.000  | 0.001  |
|        |       |        |        |        | $\langle 3425   R^0, b^0, s_{\text{sym}}^0, s_{\text{asym}}^1, t^0, s_X^0 \rangle$ | 0.09%  | 0.000  | 0.000  | 0.014  |
| 6089.0 | 0.064 | 0.001  | -0.002 | 0.000  | $\langle 3440   R^2, b^2, s_{\text{sym}}^0, s_{\text{asym}}^0, t^1, s_X^0 \rangle$ | 23.13% | 0.000  | 0.000  | 0.000  |
|        |       |        |        |        | $\langle 3440   R^4, b^1, s_{\text{sym}}^0, s_{\text{asym}}^0, t^1, s_X^0 \rangle$ | 6.21%  | 0.000  | 0.000  | 0.000  |
|        |       |        |        |        | $\langle 3440   R^3, b^0, s_{\text{sym}}^0, s_{\text{asym}}^1, t^1, s_X^0 \rangle$ | 5.24%  | 0.000  | 0.000  | 0.000  |
|        |       |        |        |        | $\langle 3440   R^0, b^0, s_{\text{sym}}^0, s_{\text{asym}}^2, t^0, s_X^0 \rangle$ | 0.95%  | 0.000  | 0.004  | 0.000  |
|        |       |        |        |        | $\langle 3440   R^0, b^0, s_{\text{sym}}^1, s_{\text{asym}}^2, t^0, s_X^0 \rangle$ | 0.46%  | 0.000  | 0.001  | 0.000  |
|        |       |        |        |        | $\langle 3440   R^0, b^0, s_{\text{sym}}^1, s_{\text{asym}}^0, t^0, s_X^0 \rangle$ | 0.08%  | 0.001  | -0.009 | 0.000  |
| 6121.9 | 0.785 | 0.000  | -0.000 | -0.007 | $\langle 3492   R^1, b^3, s_{\text{sym}}^0, s_{\text{asym}}^0, t^1, s_X^0 \rangle$ | 17.07% | 0.000  | 0.000  | 0.000  |
|        |       |        |        |        | $\langle 3492   R^1, b^1, s_{\text{sym}}^1, s_{\text{asym}}^0, t^0, s_X^0 \rangle$ | 8.48%  | 0.000  | 0.000  | 0.000  |
|        |       |        |        |        | $\langle 3492   R^0, b^0, s_{\text{sym}}^1, s_{\text{asym}}^1, t^0, s_X^0 \rangle$ | 7.62%  | 0.000  | 0.000  | 0.026  |
|        |       |        |        |        | $\langle 3492   R^0, b^0, s_{\text{sym}}^0, s_{\text{asym}}^1, t^0, s_X^0 \rangle$ | 0.84%  | 0.000  | 0.000  | -0.045 |
|        |       |        |        |        | $\langle 3492   R^0, b^0, s_{\text{sym}}^1, s_{\text{asym}}^3, t^0, s_X^0 \rangle$ | 0.32%  | 0.000  | 0.000  | 0.003  |
| 6128.2 | 0.130 | -0.000 | 0.000  | -0.003 | $\langle 3503   R^1, b^3, s_{\text{sym}}^0, s_{\text{asym}}^0, t^1, s_X^0 \rangle$ | 20.36% | 0.000  | 0.000  | 0.000  |
|        |       |        |        |        | $\langle 3503   R^1, b^1, s_{\text{sym}}^1, s_{\text{asym}}^0, t^2, s_X^0 \rangle$ | 18.38% | 0.000  | 0.000  | 0.000  |
|        |       |        |        |        | $\langle 3503   R^0, b^0, s_{\text{sym}}^1, s_{\text{asym}}^1, t^0, s_X^0 \rangle$ | 1.41%  | 0.000  | 0.000  | 0.011  |
|        |       |        |        |        | $\langle 3503   R^0, b^0, s_{\text{sym}}^0, s_{\text{asym}}^1, t^0, s_X^0 \rangle$ | 0.14%  | 0.000  | 0.000  | -0.018 |
|        |       |        |        |        | $\langle 3503   R^0, b^0, s_{\text{sym}}^1, s_{\text{asym}}^3, t^0, s_X^0 \rangle$ | 0.05%  | 0.000  | 0.000  | 0.001  |
| 6132.1 | 0.061 | -0.000 | 0.000  | -0.002 | $\langle 3513   R^1, b^1, s_{\text{sym}}^1, s_{\text{asym}}^0, t^2, s_X^0 \rangle$ | 16.21% | 0.000  | 0.000  | 0.000  |
|        |       |        |        |        | $\langle 3513   R^3, b^0, s_{\text{sym}}^0, s_{\text{asym}}^1, t^0, s_X^0 \rangle$ | 9.82%  | 0.000  | 0.000  | 0.000  |
|        |       |        |        |        | $\langle 3513   R^0, b^0, s_{\text{sym}}^1, s_{\text{asym}}^1, t^0, s_X^0 \rangle$ | 0.96%  | 0.000  | 0.000  | 0.009  |
|        |       |        |        |        | $\langle 3513   R^0, b^0, s_{\text{sym}}^0, s_{\text{asym}}^2, t^1, s_X^0 \rangle$ | 0.30%  | 0.000  | 0.000  | 0.001  |
|        |       |        |        |        | $\langle 3513   R^0, b^0, s_{\text{sym}}^0, s_{\text{asym}}^1, t^0, s_X^0 \rangle$ | 0.09%  | 0.000  | 0.000  | -0.014 |
| 6136.0 | 0.199 | 0.000  | -0.000 | 0.004  | $\langle 3519   R^4, b^1, s_{\text{sym}}^0, s_{\text{asym}}^0, t^1, s_X^0 \rangle$ | 22.01% | 0.000  | 0.000  | 0.000  |
|        |       |        |        |        | $\langle 3519   R^0, b^0, s_{\text{sym}}^1, s_{\text{asym}}^1, t^0, s_X^0 \rangle$ | 1.98%  | 0.000  | 0.000  | -0.013 |
|        |       |        |        |        | $\langle 3519   R^0, b^0, s_{\text{sym}}^0, s_{\text{asym}}^2, t^1, s_X^0 \rangle$ | 0.93%  | 0.000  | 0.000  | -0.002 |
|        |       |        |        |        | $\langle 3519   R^0, b^0, s_{\text{sym}}^0, s_{\text{asym}}^1, t^0, s_X^0 \rangle$ | 0.22%  | 0.000  | 0.000  | 0.023  |
| 6138.3 | 0.199 | -0.000 | 0.000  | 0.004  | $\langle 3525   R^4, b^1, s_{\text{sym}}^0, s_{\text{asym}}^0, t^1, s_X^0 \rangle$ | 7.57%  | 0.000  | 0.000  | 0.000  |
|        |       |        |        |        | $\langle 3525   R^0, b^0, s_{\text{sym}}^1, s_{\text{asym}}^1, t^0, s_X^0 \rangle$ | 1.95%  | 0.000  | 0.000  | -0.013 |
|        |       |        |        |        | $\langle 3525   R^0, b^0, s_{\text{sym}}^0, s_{\text{asym}}^2, t^1, s_X^0 \rangle$ | 0.80%  | 0.000  | 0.000  | -0.002 |
|        |       |        |        |        | $\langle 3525   R^0, b^0, s_{\text{sym}}^0, s_{\text{asym}}^1, t^0, s_X^0 \rangle$ | 0.22%  | 0.000  | 0.000  | 0.023  |
| 6161.5 | 0.096 | -0.001 | 0.002  | -0.000 | $\langle 3563   R^4, b^1, s_{\text{sym}}^0, s_{\text{asym}}^0, t^0, s_X^0 \rangle$ | 40.60% | 0.000  | 0.000  | 0.000  |
|        |       |        |        |        | $\langle 3563   R^1, b^1, s_{\text{sym}}^0, s_{\text{asym}}^1, t^0, s_X^0 \rangle$ | 10.07% | 0.000  | 0.000  | 0.000  |
|        |       |        |        |        | $\langle 3563   R^3, b^0, s_{\text{sym}}^0, s_{\text{asym}}^1, t^0, s_X^0 \rangle$ | 5.19%  | 0.000  | 0.000  | 0.000  |
|        |       |        |        |        | $\langle 3563   R^0, b^0, s_{\text{sym}}^1, s_{\text{asym}}^1, t^1, s_X^0 \rangle$ | 1.60%  | 0.000  | -0.001 | 0.000  |
|        |       |        |        |        | $\langle 3563   R^2, b^0, s_{\text{sym}}^1, s_{\text{asym}}^0, t^0, s_X^0 \rangle$ | 0.11%  | -0.001 | -0.001 | 0.000  |
|        |       |        |        |        | $\langle 3563   R^0, b^0, s_{\text{sym}}^1, s_{\text{asym}}^0, t^0, s_X^0 \rangle$ | 0.02%  | 0.000  | 0.005  | 0.000  |
| 6167.7 | 0.128 | 0.001  | -0.003 | 0.000  | $\langle 3576   R^1, b^1, s_{\text{sym}}^0, s_{\text{asym}}^1, t^0, s_X^0 \rangle$ | 19.31% | 0.000  | 0.000  | 0.000  |
|        |       |        |        |        | $\langle 3576   R^4, b^1, s_{\text{sym}}^0, s_{\text{asym}}^0, t^0, s_X^0 \rangle$ | 8.33%  | 0.000  | 0.000  | 0.000  |
|        |       |        |        |        | $\langle 3576   R^0, b^0, s_{\text{sym}}^1, s_{\text{asym}}^1, t^1, s_X^0 \rangle$ | 3.18%  | 0.000  | 0.002  | 0.000  |

|        |       |        |        |        |                                                                                    |        |        |        |        |
|--------|-------|--------|--------|--------|------------------------------------------------------------------------------------|--------|--------|--------|--------|
|        |       |        |        |        | $\langle 3576   R^3, b^0, s_{\text{sym}}^0, s_{\text{asym}}^1, t^0, s_X^0 \rangle$ | 1.69%  | -0.001 | 0.000  | 0.000  |
|        |       |        |        |        | $\langle 3576   R^0, b^0, s_{\text{sym}}^1, s_{\text{asym}}^0, t^0, s_X^0 \rangle$ | 0.03%  | 0.000  | -0.006 | 0.000  |
| 6187.3 | 0.064 | -0.001 | 0.002  | -0.000 | $\langle 3621   R^5, b^0, s_{\text{sym}}^0, s_{\text{asym}}^0, t^2, s_X^0 \rangle$ | 22.90% | 0.000  | 0.000  | 0.000  |
|        |       |        |        |        | $\langle 3621   R^1, b^1, s_{\text{sym}}^1, s_{\text{asym}}^0, t^1, s_X^0 \rangle$ | 6.86%  | 0.000  | 0.000  | 0.000  |
|        |       |        |        |        | $\langle 3621   R^0, b^0, s_{\text{sym}}^1, s_{\text{asym}}^1, t^1, s_X^0 \rangle$ | 2.64%  | 0.000  | 0.002  | 0.000  |
|        |       |        |        |        | $\langle 3621   R^0, b^0, s_{\text{sym}}^0, s_{\text{asym}}^2, t^0, s_X^0 \rangle$ | 1.45%  | 0.000  | -0.005 | 0.000  |
|        |       |        |        |        | $\langle 3621   R^0, b^0, s_{\text{sym}}^1, s_{\text{asym}}^0, t^0, s_X^0 \rangle$ | 0.08%  | -0.001 | 0.009  | 0.000  |
| 6226.3 | 0.110 | 0.000  | -0.000 | -0.003 | $\langle 3709   R^2, b^0, s_{\text{sym}}^0, s_{\text{asym}}^1, t^2, s_X^0 \rangle$ | 40.12% | 0.000  | 0.000  | 0.000  |
|        |       |        |        |        | $\langle 3709   R^3, b^1, s_{\text{sym}}^0, s_{\text{asym}}^0, t^2, s_X^0 \rangle$ | 6.39%  | 0.000  | 0.000  | 0.000  |
|        |       |        |        |        | $\langle 3709   R^0, b^0, s_{\text{sym}}^1, s_{\text{asym}}^1, t^0, s_X^0 \rangle$ | 2.40%  | 0.000  | 0.000  | 0.015  |
|        |       |        |        |        | $\langle 3709   R^0, b^0, s_{\text{sym}}^0, s_{\text{asym}}^2, t^1, s_X^0 \rangle$ | 1.37%  | 0.000  | 0.000  | -0.002 |
|        |       |        |        |        | $\langle 3709   R^0, b^0, s_{\text{sym}}^0, s_{\text{asym}}^1, t^0, s_X^0 \rangle$ | 0.15%  | 0.000  | 0.000  | -0.019 |
| 6230.5 | 0.088 | 0.000  | -0.000 | -0.002 | $\langle 3718   R^3, b^0, s_{\text{sym}}^0, s_{\text{asym}}^1, t^1, s_X^0 \rangle$ | 20.56% | 0.000  | 0.000  | 0.000  |
|        |       |        |        |        | $\langle 3718   R^0, b^0, s_{\text{sym}}^1, s_{\text{asym}}^1, t^0, s_X^0 \rangle$ | 1.99%  | 0.000  | 0.000  | 0.013  |
|        |       |        |        |        | $\langle 3718   R^0, b^0, s_{\text{sym}}^0, s_{\text{asym}}^2, t^1, s_X^0 \rangle$ | 1.87%  | 0.000  | 0.000  | -0.003 |
|        |       |        |        |        | $\langle 3718   R^0, b^0, s_{\text{sym}}^0, s_{\text{asym}}^1, t^0, s_X^0 \rangle$ | 0.10%  | 0.000  | 0.000  | -0.016 |
| 6240.4 | 0.235 | -0.000 | 0.000  | 0.004  | $\langle 3743   R^1, b^1, s_{\text{sym}}^0, s_{\text{asym}}^1, t^1, s_X^0 \rangle$ | 6.04%  | 0.000  | 0.000  | 0.000  |
|        |       |        |        |        | $\langle 3743   R^0, b^0, s_{\text{sym}}^1, s_{\text{asym}}^1, t^0, s_X^0 \rangle$ | 5.62%  | 0.000  | 0.000  | -0.022 |
|        |       |        |        |        | $\langle 3743   R^0, b^0, s_{\text{sym}}^0, s_{\text{asym}}^2, t^1, s_X^0 \rangle$ | 4.56%  | 0.000  | 0.000  | 0.004  |
|        |       |        |        |        | $\langle 3743   R^0, b^0, s_{\text{sym}}^0, s_{\text{asym}}^1, t^0, s_X^0 \rangle$ | 0.36%  | 0.000  | 0.000  | 0.029  |
| 6273.7 | 0.069 | 0.000  | -0.000 | 0.002  | $\langle 3791   R^2, b^2, s_{\text{sym}}^0, s_{\text{asym}}^0, t^2, s_X^0 \rangle$ | 39.71% | 0.000  | 0.000  | 0.000  |
|        |       |        |        |        | $\langle 3791   R^1, b^1, s_{\text{sym}}^0, s_{\text{asym}}^1, t^2, s_X^0 \rangle$ | 10.90% | 0.000  | 0.000  | 0.000  |
|        |       |        |        |        | $\langle 3791   R^2, b^0, s_{\text{sym}}^1, s_{\text{asym}}^0, t^2, s_X^0 \rangle$ | 6.01%  | 0.000  | 0.000  | 0.000  |
|        |       |        |        |        | $\langle 3791   R^0, b^0, s_{\text{sym}}^1, s_{\text{asym}}^1, t^0, s_X^0 \rangle$ | 1.62%  | 0.000  | 0.000  | -0.012 |
|        |       |        |        |        | $\langle 3791   R^0, b^0, s_{\text{sym}}^0, s_{\text{asym}}^2, t^1, s_X^0 \rangle$ | 0.70%  | 0.000  | 0.000  | 0.002  |
|        |       |        |        |        | $\langle 3791   R^0, b^0, s_{\text{sym}}^0, s_{\text{asym}}^1, t^0, s_X^0 \rangle$ | 0.10%  | 0.000  | 0.000  | 0.015  |
| 6293.2 | 0.051 | -0.001 | 0.002  | 0.000  | $\langle 3817   R^1, b^1, s_{\text{sym}}^1, s_{\text{asym}}^0, t^2, s_X^0 \rangle$ | 17.65% | 0.000  | 0.000  | 0.000  |
|        |       |        |        |        | $\langle 3817   R^0, b^0, s_{\text{sym}}^1, s_{\text{asym}}^1, t^1, s_X^0 \rangle$ | 6.50%  | 0.000  | 0.002  | 0.000  |
|        |       |        |        |        | $\langle 3817   R^0, b^2, s_{\text{sym}}^1, s_{\text{asym}}^0, t^0, s_X^0 \rangle$ | 5.88%  | 0.000  | 0.002  | 0.000  |
|        |       |        |        |        | $\langle 3817   R^0, b^0, s_{\text{sym}}^2, s_{\text{asym}}^0, t^0, s_X^0 \rangle$ | 5.42%  | 0.000  | 0.000  | 0.000  |
|        |       |        |        |        | $\langle 3817   R^0, b^0, s_{\text{sym}}^0, s_{\text{asym}}^1, t^1, s_X^0 \rangle$ | 0.74%  | 0.000  | -0.001 | 0.000  |
| 6332.9 | 0.100 | -0.000 | 0.000  | -0.003 | $\langle 3903   R^1, b^1, s_{\text{sym}}^0, s_{\text{asym}}^1, t^1, s_X^0 \rangle$ | 16.09% | 0.000  | 0.000  | 0.002  |
|        |       |        |        |        | $\langle 3903   R^0, b^0, s_{\text{sym}}^2, s_{\text{asym}}^0, t^1, s_X^0 \rangle$ | 6.91%  | 0.000  | 0.000  | -0.001 |
|        |       |        |        |        | $\langle 3903   R^0, b^0, s_{\text{sym}}^1, s_{\text{asym}}^1, t^0, s_X^0 \rangle$ | 2.17%  | 0.000  | 0.000  | 0.014  |
|        |       |        |        |        | $\langle 3903   R^0, b^0, s_{\text{sym}}^0, s_{\text{asym}}^1, t^0, s_X^0 \rangle$ | 0.15%  | 0.000  | 0.000  | -0.019 |
| 6417.5 | 0.068 | -0.000 | -0.002 | -0.000 | $\langle 4090   R^0, b^0, s_{\text{sym}}^2, s_{\text{asym}}^0, t^0, s_X^0 \rangle$ | 13.84% | -0.001 | -0.001 | 0.000  |
|        |       |        |        |        | $\langle 4090   R^0, b^0, s_{\text{sym}}^0, s_{\text{asym}}^2, t^0, s_X^0 \rangle$ | 8.89%  | 0.001  | -0.013 | 0.000  |
|        |       |        |        |        | $\langle 4090   R^0, b^2, s_{\text{sym}}^1, s_{\text{asym}}^0, t^0, s_X^0 \rangle$ | 6.90%  | 0.000  | 0.002  | 0.000  |
|        |       |        |        |        | $\langle 4090   R^1, b^3, s_{\text{sym}}^0, s_{\text{asym}}^0, t^1, s_X^0 \rangle$ | 6.15%  | 0.000  | 0.000  | 0.000  |
|        |       |        |        |        | $\langle 4090   R^2, b^0, s_{\text{sym}}^1, s_{\text{asym}}^0, t^0, s_X^0 \rangle$ | 0.45%  | 0.001  | 0.001  | 0.000  |
|        |       |        |        |        | $\langle 4090   R^0, b^0, s_{\text{sym}}^1, s_{\text{asym}}^0, t^0, s_X^0 \rangle$ | 0.06%  | -0.001 | 0.008  | 0.000  |

MeOH<sub>2</sub> ··· CO

| $\omega$ | $I$   | $\mu_x$ | $\mu_y$ | $\mu_z$ | Assignment                                                                       | $ c_n ^2$ | $\mu_x^{g \rightarrow n}$ | $\mu_y^{g \rightarrow n}$ | $\mu_z^{g \rightarrow n}$ |
|----------|-------|---------|---------|---------|----------------------------------------------------------------------------------|-----------|---------------------------|---------------------------|---------------------------|
| 4131.3   | 0.139 | -0.001  | -0.003  | -0.001  | $\langle 292   R^1, b^2, s_{\text{HB}}^0, s_{\text{free}}^0, t^0, s_X^0 \rangle$ | 42.65%    | 0.001                     | -0.001                    | 0.003                     |
|          |       |         |         |         | $\langle 292   R^0, b^1, s_{\text{HB}}^1, s_{\text{free}}^0, t^0, s_X^0 \rangle$ | 11.29%    | -0.008                    | 0.000                     | 0.002                     |
|          |       |         |         |         | $\langle 292   R^1, b^0, s_{\text{HB}}^0, s_{\text{free}}^0, t^0, s_X^0 \rangle$ | 0.02%     | -0.001                    | 0.002                     | -0.003                    |
|          |       |         |         |         | $\langle 292   R^0, b^0, s_{\text{HB}}^1, s_{\text{free}}^0, t^0, s_X^0 \rangle$ | 0.01%     | 0.005                     | 0.001                     | 0.000                     |
| 4168.5   | 0.074 | 0.001   | -0.002  | -0.001  | $\langle 297   R^4, b^0, s_{\text{HB}}^0, s_{\text{free}}^0, t^1, s_X^0 \rangle$ | 13.15%    | 0.000                     | 0.000                     | 0.000                     |
|          |       |         |         |         | $\langle 297   R^1, b^2, s_{\text{HB}}^0, s_{\text{free}}^0, t^0, s_X^0 \rangle$ | 5.92%     | 0.000                     | 0.000                     | -0.001                    |
|          |       |         |         |         | $\langle 297   R^0, b^1, s_{\text{HB}}^1, s_{\text{free}}^0, t^0, s_X^0 \rangle$ | 3.79%     | -0.005                    | 0.000                     | 0.001                     |
|          |       |         |         |         | $\langle 297   R^1, b^0, s_{\text{HB}}^1, s_{\text{free}}^0, t^0, s_X^0 \rangle$ | 0.35%     | 0.002                     | 0.000                     | 0.000                     |
| 4174.5   | 0.061 | 0.001   | 0.002   | 0.001   | $\langle 299   R^4, b^0, s_{\text{HB}}^0, s_{\text{free}}^0, t^1, s_X^0 \rangle$ | 13.07%    | 0.000                     | 0.000                     | 0.000                     |
|          |       |         |         |         | $\langle 299   R^0, b^1, s_{\text{HB}}^0, s_{\text{free}}^0, t^2, s_X^1 \rangle$ | 9.90%     | 0.000                     | 0.000                     | 0.000                     |
|          |       |         |         |         | $\langle 299   R^2, b^1, s_{\text{HB}}^0, s_{\text{free}}^0, t^3, s_X^0 \rangle$ | 6.18%     | 0.000                     | 0.000                     | 0.000                     |
|          |       |         |         |         | $\langle 299   R^0, b^1, s_{\text{HB}}^1, s_{\text{free}}^0, t^0, s_X^0 \rangle$ | 3.21%     | 0.004                     | 0.000                     | -0.001                    |
| 4195.2   | 0.234 | -0.001  | -0.004  | -0.003  | $\langle 304   R^2, b^1, s_{\text{HB}}^0, s_{\text{free}}^0, t^1, s_X^0 \rangle$ | 22.23%    | 0.000                     | 0.000                     | 0.000                     |
|          |       |         |         |         | $\langle 304   R^0, b^1, s_{\text{HB}}^1, s_{\text{free}}^0, t^0, s_X^0 \rangle$ | 17.79%    | -0.010                    | 0.000                     | 0.002                     |
|          |       |         |         |         | $\langle 304   R^1, b^2, s_{\text{HB}}^0, s_{\text{free}}^0, t^0, s_X^0 \rangle$ | 12.82%    | 0.000                     | 0.000                     | -0.001                    |
|          |       |         |         |         | $\langle 304   R^0, b^0, s_{\text{HB}}^1, s_{\text{free}}^0, t^0, s_X^0 \rangle$ | 0.04%     | 0.011                     | 0.001                     | 0.000                     |
| 4287.7   | 0.058 | -0.002  | -0.000  | -0.001  | $\langle 325   R^2, b^1, s_{\text{HB}}^0, s_{\text{free}}^0, t^0, s_X^0 \rangle$ | 29.76%    | -0.001                    | 0.002                     | 0.001                     |
|          |       |         |         |         | $\langle 325   R^2, b^1, s_{\text{HB}}^0, s_{\text{free}}^0, t^3, s_X^0 \rangle$ | 10.61%    | 0.000                     | 0.000                     | 0.000                     |
|          |       |         |         |         | $\langle 325   R^0, b^1, s_{\text{HB}}^1, s_{\text{free}}^0, t^0, s_X^0 \rangle$ | 0.37%     | -0.001                    | 0.000                     | 0.000                     |
|          |       |         |         |         | $\langle 325   R^0, b^1, s_{\text{HB}}^0, s_{\text{free}}^0, t^0, s_X^0 \rangle$ | 0.04%     | 0.001                     | -0.002                    | -0.001                    |
| 4384.7   | 0.055 | -0.001  | 0.002   | 0.001   | $\langle 352   R^3, b^1, s_{\text{HB}}^0, s_{\text{free}}^0, t^0, s_X^0 \rangle$ | 25.09%    | 0.001                     | -0.001                    | 0.002                     |
|          |       |         |         |         | $\langle 352   R^0, b^1, s_{\text{HB}}^1, s_{\text{free}}^0, t^0, s_X^0 \rangle$ | 4.70%     | 0.005                     | 0.000                     | -0.001                    |
|          |       |         |         |         | $\langle 352   R^0, b^0, s_{\text{HB}}^2, s_{\text{free}}^0, t^0, s_X^0 \rangle$ | 0.15%     | -0.003                    | 0.000                     | 0.000                     |
|          |       |         |         |         | $\langle 352   R^0, b^0, s_{\text{HB}}^1, s_{\text{free}}^0, t^0, s_X^0 \rangle$ | 0.01%     | 0.005                     | 0.001                     | 0.000                     |
| 4406.2   | 0.361 | -0.004  | -0.004  | -0.002  | $\langle 357   R^1, b^2, s_{\text{HB}}^0, s_{\text{free}}^0, t^0, s_X^0 \rangle$ | 15.43%    | 0.000                     | 0.000                     | 0.000                     |
|          |       |         |         |         | $\langle 357   R^0, b^1, s_{\text{HB}}^1, s_{\text{free}}^0, t^0, s_X^0 \rangle$ | 12.17%    | -0.008                    | 0.000                     | 0.002                     |
|          |       |         |         |         | $\langle 357   R^3, b^1, s_{\text{HB}}^0, s_{\text{free}}^0, t^0, s_X^0 \rangle$ | 9.25%     | 0.000                     | -0.001                    | 0.001                     |
|          |       |         |         |         | $\langle 357   R^2, b^0, s_{\text{HB}}^1, s_{\text{free}}^0, t^0, s_X^0 \rangle$ | 5.70%     | -0.004                    | -0.002                    | 0.002                     |
|          |       |         |         |         | $\langle 357   R^0, b^0, s_{\text{HB}}^2, s_{\text{free}}^0, t^0, s_X^0 \rangle$ | 0.41%     | -0.005                    | 0.000                     | 0.000                     |
|          |       |         |         |         | $\langle 357   R^0, b^0, s_{\text{HB}}^1, s_{\text{free}}^0, t^0, s_X^0 \rangle$ | 0.14%     | 0.020                     | 0.002                     | -0.001                    |

|        |       |        |        |        |                                                                                  |        |        |        |        |
|--------|-------|--------|--------|--------|----------------------------------------------------------------------------------|--------|--------|--------|--------|
| 4422.6 | 0.053 | -0.002 | 0.001  | 0.000  | $\langle 359   R^4, b^0, s_{\text{HB}}^0, s_{\text{free}}^0, t^1, s_X^0 \rangle$ | 45.16% | 0.000  | 0.000  | 0.000  |
|        |       |        |        |        | $\langle 359   R^0, b^1, s_{\text{HB}}^1, s_{\text{free}}^0, t^0, s_X^0 \rangle$ | 0.52%  | 0.002  | 0.000  | 0.000  |
|        |       |        |        |        | $\langle 359   R^0, b^0, s_{\text{HB}}^2, s_{\text{free}}^0, t^0, s_X^0 \rangle$ | 0.09%  | -0.002 | 0.000  | 0.000  |
|        |       |        |        |        | $\langle 359   R^0, b^0, s_{\text{HB}}^0, s_{\text{free}}^0, t^1, s_X^0 \rangle$ | 0.01%  | -0.002 | 0.000  | 0.000  |
| 4434.2 | 0.281 | 0.005  | 0.001  | 0.000  | $\langle 363   R^0, b^0, s_{\text{HB}}^0, s_{\text{free}}^0, t^0, s_X^2 \rangle$ | 94.34% | 0.005  | 0.001  | 0.000  |
|        |       |        |        |        | $\langle 363   R^2, b^0, s_{\text{HB}}^0, s_{\text{free}}^0, t^0, s_X^1 \rangle$ | 1.54%  | 0.000  | 0.000  | 0.000  |
|        |       |        |        |        | $\langle 363   R^0, b^0, s_{\text{HB}}^0, s_{\text{free}}^0, t^1, s_X^0 \rangle$ | 0.00%  | 0.000  | 0.000  | 0.000  |
| 4439.5 | 1.563 | 0.004  | -0.011 | -0.000 | $\langle 367   R^1, b^0, s_{\text{HB}}^0, s_{\text{free}}^1, t^0, s_X^0 \rangle$ | 75.25% | -0.005 | 0.003  | -0.015 |
|        |       |        |        |        | $\langle 367   R^1, b^0, s_{\text{HB}}^0, s_{\text{free}}^0, t^0, s_X^0 \rangle$ | 0.62%  | 0.006  | -0.011 | 0.017  |
|        |       |        |        |        | $\langle 367   R^0, b^0, s_{\text{HB}}^1, s_{\text{free}}^0, t^0, s_X^0 \rangle$ | 0.01%  | -0.004 | 0.000  | 0.000  |
| 4458.8 | 0.181 | 0.004  | -0.001 | -0.000 | $\langle 372   R^2, b^0, s_{\text{HB}}^1, s_{\text{free}}^0, t^0, s_X^0 \rangle$ | 13.24% | 0.006  | 0.002  | -0.004 |
|        |       |        |        |        | $\langle 372   R^3, b^1, s_{\text{HB}}^0, s_{\text{free}}^0, t^0, s_X^0 \rangle$ | 10.67% | 0.000  | -0.001 | 0.002  |
|        |       |        |        |        | $\langle 372   R^0, b^0, s_{\text{HB}}^2, s_{\text{free}}^0, t^0, s_X^0 \rangle$ | 0.87%  | 0.008  | 0.000  | 0.000  |
|        |       |        |        |        | $\langle 372   R^0, b^0, s_{\text{HB}}^1, s_{\text{free}}^0, t^0, s_X^0 \rangle$ | 0.16%  | -0.022 | -0.002 | 0.001  |
| 4539.6 | 0.108 | 0.003  | 0.000  | 0.000  | $\langle 392   R^4, b^0, s_{\text{HB}}^0, s_{\text{free}}^0, t^2, s_X^0 \rangle$ | 25.58% | 0.000  | 0.000  | 0.000  |
|        |       |        |        |        | $\langle 392   R^2, b^1, s_{\text{HB}}^0, s_{\text{free}}^0, t^4, s_X^0 \rangle$ | 6.22%  | 0.000  | 0.000  | 0.000  |
|        |       |        |        |        | $\langle 392   R^2, b^0, s_{\text{HB}}^1, s_{\text{free}}^0, t^0, s_X^0 \rangle$ | 0.83%  | 0.001  | 0.001  | -0.001 |
|        |       |        |        |        | $\langle 392   R^0, b^0, s_{\text{HB}}^2, s_{\text{free}}^0, t^0, s_X^0 \rangle$ | 0.36%  | 0.005  | 0.000  | 0.000  |
|        |       |        |        |        | $\langle 392   R^0, b^0, s_{\text{HB}}^1, s_{\text{free}}^0, t^0, s_X^0 \rangle$ | 0.00%  | -0.003 | 0.000  | 0.000  |
| 4543.4 | 0.124 | 0.003  | -0.000 | 0.000  | $\langle 393   R^3, b^1, s_{\text{HB}}^0, s_{\text{free}}^0, t^0, s_X^0 \rangle$ | 20.63% | 0.000  | 0.000  | -0.001 |
|        |       |        |        |        | $\langle 393   R^4, b^0, s_{\text{HB}}^0, s_{\text{free}}^0, t^1, s_X^0 \rangle$ | 6.12%  | 0.000  | 0.000  | 0.000  |
|        |       |        |        |        | $\langle 393   R^2, b^0, s_{\text{HB}}^1, s_{\text{free}}^0, t^0, s_X^0 \rangle$ | 4.54%  | 0.003  | 0.001  | -0.002 |
|        |       |        |        |        | $\langle 393   R^0, b^0, s_{\text{HB}}^2, s_{\text{free}}^0, t^0, s_X^0 \rangle$ | 0.50%  | 0.006  | 0.000  | 0.000  |
|        |       |        |        |        | $\langle 393   R^0, b^0, s_{\text{HB}}^1, s_{\text{free}}^0, t^0, s_X^0 \rangle$ | 0.04%  | -0.012 | -0.001 | 0.000  |
| 4547.4 | 0.136 | 0.003  | 0.000  | 0.000  | $\langle 394   R^4, b^0, s_{\text{HB}}^0, s_{\text{free}}^0, t^1, s_X^0 \rangle$ | 24.26% | 0.000  | 0.000  | 0.000  |
|        |       |        |        |        | $\langle 394   R^0, b^1, s_{\text{HB}}^0, s_{\text{free}}^0, t^4, s_X^1 \rangle$ | 11.59% | 0.000  | 0.000  | 0.000  |
|        |       |        |        |        | $\langle 394   R^2, b^0, s_{\text{HB}}^1, s_{\text{free}}^0, t^0, s_X^0 \rangle$ | 1.88%  | 0.002  | 0.001  | -0.001 |
|        |       |        |        |        | $\langle 394   R^0, b^0, s_{\text{HB}}^2, s_{\text{free}}^0, t^0, s_X^0 \rangle$ | 0.55%  | 0.006  | 0.000  | 0.000  |
|        |       |        |        |        | $\langle 394   R^0, b^0, s_{\text{HB}}^1, s_{\text{free}}^0, t^0, s_X^0 \rangle$ | 0.02%  | -0.007 | -0.001 | 0.000  |
| 4548.4 | 0.141 | 0.004  | -0.000 | 0.000  | $\langle 395   R^0, b^1, s_{\text{HB}}^0, s_{\text{free}}^0, t^4, s_X^1 \rangle$ | 40.91% | 0.000  | 0.000  | 0.000  |
|        |       |        |        |        | $\langle 395   R^2, b^1, s_{\text{HB}}^0, s_{\text{free}}^0, t^4, s_X^0 \rangle$ | 5.89%  | 0.000  | 0.000  | 0.000  |
|        |       |        |        |        | $\langle 395   R^2, b^0, s_{\text{HB}}^1, s_{\text{free}}^0, t^0, s_X^0 \rangle$ | 2.82%  | 0.003  | 0.001  | -0.002 |
|        |       |        |        |        | $\langle 395   R^0, b^0, s_{\text{HB}}^2, s_{\text{free}}^0, t^0, s_X^0 \rangle$ | 0.64%  | 0.006  | 0.000  | 0.000  |
|        |       |        |        |        | $\langle 395   R^0, b^0, s_{\text{HB}}^1, s_{\text{free}}^0, t^0, s_X^0 \rangle$ | 0.02%  | -0.008 | -0.001 | 0.000  |
| 4583.5 | 0.183 | 0.004  | -0.000 | 0.000  | $\langle 405   R^2, b^0, s_{\text{HB}}^1, s_{\text{free}}^0, t^0, s_X^0 \rangle$ | 10.31% | -0.007 | 0.001  | -0.001 |
|        |       |        |        |        | $\langle 405   R^4, b^0, s_{\text{HB}}^0, s_{\text{free}}^0, t^3, s_X^0 \rangle$ | 6.10%  | 0.000  | 0.000  | 0.000  |
|        |       |        |        |        | $\langle 405   R^3, b^1, s_{\text{HB}}^0, s_{\text{free}}^0, t^0, s_X^0 \rangle$ | 5.97%  | 0.000  | 0.000  | 0.000  |
|        |       |        |        |        | $\langle 405   R^4, b^0, s_{\text{HB}}^0, s_{\text{free}}^0, t^2, s_X^0 \rangle$ | 5.95%  | 0.000  | 0.000  | 0.000  |
|        |       |        |        |        | $\langle 405   R^0, b^0, s_{\text{HB}}^2, s_{\text{free}}^0, t^0, s_X^0 \rangle$ | 0.94%  | 0.008  | 0.000  | 0.000  |
| 4584.3 | 0.103 | 0.003  | -0.000 | 0.000  | $\langle 406   R^4, b^0, s_{\text{HB}}^0, s_{\text{free}}^0, t^3, s_X^0 \rangle$ | 19.90% | 0.000  | 0.000  | 0.000  |
|        |       |        |        |        | $\langle 406   R^0, b^0, s_{\text{HB}}^0, s_{\text{free}}^0, t^1, s_X^2 \rangle$ | 10.35% | 0.000  | 0.000  | 0.000  |

|        |       |        |        |        |                                                                                  |        |        |        |        |
|--------|-------|--------|--------|--------|----------------------------------------------------------------------------------|--------|--------|--------|--------|
|        |       |        |        |        | $\langle 406   R^4, b^0, s_{\text{HB}}^0, s_{\text{free}}^0, t^2, s_X^0 \rangle$ | 5.30%  | 0.000  | 0.000  | 0.000  |
|        |       |        |        |        | $\langle 406   R^2, b^0, s_{\text{HB}}^1, s_{\text{free}}^0, t^0, s_X^0 \rangle$ | 2.76%  | -0.005 | 0.000  | 0.000  |
|        |       |        |        |        | $\langle 406   R^0, b^0, s_{\text{HB}}^2, s_{\text{free}}^0, t^0, s_X^0 \rangle$ | 0.42%  | 0.005  | 0.000  | 0.000  |
| 4591.9 | 0.067 | 0.002  | -0.001 | 0.001  | $\langle 409   R^1, b^0, s_{\text{HB}}^0, s_{\text{free}}^1, t^1, s_X^0 \rangle$ | 16.37% | -0.001 | 0.001  | 0.000  |
|        |       |        |        |        | $\langle 409   R^1, b^2, s_{\text{HB}}^0, s_{\text{free}}^0, t^0, s_X^0 \rangle$ | 12.94% | 0.000  | 0.000  | 0.000  |
|        |       |        |        |        | $\langle 409   R^0, b^0, s_{\text{HB}}^0, s_{\text{free}}^1, t^0, s_X^0 \rangle$ | 0.01%  | -0.001 | -0.001 | -0.001 |
|        |       |        |        |        | $\langle 409   R^0, b^0, s_{\text{HB}}^1, s_{\text{free}}^0, t^0, s_X^0 \rangle$ | 0.00%  | 0.003  | 0.000  | 0.000  |
|        |       |        |        |        | $\langle 409   R^1, b^0, s_{\text{HB}}^0, s_{\text{free}}^0, t^0, s_X^0 \rangle$ | 0.00%  | 0.000  | -0.001 | 0.001  |
| 4594.2 | 0.118 | 0.003  | -0.001 | 0.001  | $\langle 410   R^1, b^0, s_{\text{HB}}^0, s_{\text{free}}^1, t^1, s_X^0 \rangle$ | 32.31% | -0.001 | 0.001  | -0.001 |
|        |       |        |        |        | $\langle 410   R^1, b^0, s_{\text{HB}}^0, s_{\text{free}}^1, t^0, s_X^0 \rangle$ | 21.10% | 0.000  | 0.001  | 0.003  |
|        |       |        |        |        | $\langle 410   R^1, b^2, s_{\text{HB}}^0, s_{\text{free}}^0, t^0, s_X^0 \rangle$ | 20.15% | 0.000  | 0.000  | 0.000  |
|        |       |        |        |        | $\langle 410   R^0, b^0, s_{\text{HB}}^0, s_{\text{free}}^1, t^0, s_X^0 \rangle$ | 0.01%  | -0.001 | -0.001 | -0.001 |
| 4601.3 | 0.113 | 0.002  | -0.003 | 0.000  | $\langle 412   R^1, b^2, s_{\text{HB}}^0, s_{\text{free}}^0, t^0, s_X^0 \rangle$ | 30.67% | 0.000  | -0.001 | 0.000  |
|        |       |        |        |        | $\langle 412   R^0, b^1, s_{\text{HB}}^1, s_{\text{free}}^0, t^1, s_X^0 \rangle$ | 8.99%  | 0.001  | 0.001  | 0.000  |
|        |       |        |        |        | $\langle 412   R^1, b^0, s_{\text{HB}}^0, s_{\text{free}}^1, t^0, s_X^0 \rangle$ | 5.31%  | 0.001  | 0.000  | 0.000  |
|        |       |        |        |        | $\langle 412   R^0, b^1, s_{\text{HB}}^1, s_{\text{free}}^0, t^0, s_X^0 \rangle$ | 3.57%  | -0.005 | 0.000  | 0.001  |
|        |       |        |        |        | $\langle 412   R^0, b^1, s_{\text{HB}}^0, s_{\text{free}}^0, t^0, s_X^0 \rangle$ | 0.11%  | 0.002  | -0.003 | -0.002 |
|        |       |        |        |        | $\langle 412   R^0, b^0, s_{\text{HB}}^1, s_{\text{free}}^0, t^0, s_X^0 \rangle$ | 0.00%  | 0.002  | 0.000  | 0.000  |
| 4606.0 | 0.366 | -0.005 | 0.001  | -0.002 | $\langle 414   R^1, b^0, s_{\text{HB}}^0, s_{\text{free}}^1, t^0, s_X^0 \rangle$ | 51.81% | -0.002 | -0.002 | -0.003 |
|        |       |        |        |        | $\langle 414   R^1, b^0, s_{\text{HB}}^0, s_{\text{free}}^1, t^1, s_X^0 \rangle$ | 27.22% | -0.001 | 0.001  | 0.000  |
|        |       |        |        |        | $\langle 414   R^0, b^0, s_{\text{HB}}^1, s_{\text{free}}^0, t^0, s_X^0 \rangle$ | 0.00%  | -0.002 | 0.000  | 0.000  |
| 4685.8 | 0.058 | 0.002  | 0.000  | 0.000  | $\langle 438   R^4, b^0, s_{\text{HB}}^0, s_{\text{free}}^0, t^1, s_X^0 \rangle$ | 33.91% | 0.000  | 0.000  | 0.000  |
|        |       |        |        |        | $\langle 438   R^0, b^0, s_{\text{HB}}^2, s_{\text{free}}^0, t^0, s_X^0 \rangle$ | 0.26%  | 0.004  | 0.000  | 0.000  |
|        |       |        |        |        | $\langle 438   R^0, b^0, s_{\text{HB}}^1, s_{\text{free}}^0, t^0, s_X^0 \rangle$ | 0.00%  | -0.003 | 0.000  | 0.000  |
|        |       |        |        |        | $\langle 438   R^0, b^0, s_{\text{HB}}^0, s_{\text{free}}^0, t^1, s_X^0 \rangle$ | 0.00%  | 0.001  | 0.000  | 0.000  |
| 4689.7 | 0.084 | 0.003  | -0.000 | 0.000  | $\langle 439   R^4, b^0, s_{\text{HB}}^0, s_{\text{free}}^0, t^2, s_X^0 \rangle$ | 43.39% | 0.000  | 0.000  | 0.000  |
|        |       |        |        |        | $\langle 439   R^2, b^0, s_{\text{HB}}^1, s_{\text{free}}^0, t^0, s_X^0 \rangle$ | 0.66%  | 0.001  | 0.001  | -0.001 |
|        |       |        |        |        | $\langle 439   R^0, b^0, s_{\text{HB}}^2, s_{\text{free}}^0, t^0, s_X^0 \rangle$ | 0.47%  | 0.006  | 0.000  | 0.000  |
|        |       |        |        |        | $\langle 439   R^0, b^0, s_{\text{HB}}^1, s_{\text{free}}^0, t^0, s_X^0 \rangle$ | 0.01%  | -0.007 | -0.001 | 0.000  |
| 4710.5 | 0.740 | 0.008  | 0.001  | 0.000  | $\langle 443   R^3, b^1, s_{\text{HB}}^0, s_{\text{free}}^0, t^0, s_X^0 \rangle$ | 15.13% | 0.000  | 0.000  | 0.000  |
|        |       |        |        |        | $\langle 443   R^2, b^0, s_{\text{HB}}^1, s_{\text{free}}^0, t^0, s_X^0 \rangle$ | 11.36% | -0.004 | 0.001  | -0.001 |
|        |       |        |        |        | $\langle 443   R^2, b^0, s_{\text{HB}}^1, s_{\text{free}}^0, t^1, s_X^0 \rangle$ | 5.35%  | -0.002 | 0.000  | 0.000  |
|        |       |        |        |        | $\langle 443   R^0, b^0, s_{\text{HB}}^2, s_{\text{free}}^0, t^0, s_X^0 \rangle$ | 1.85%  | 0.011  | 0.001  | -0.001 |
|        |       |        |        |        | $\langle 443   R^0, b^0, s_{\text{HB}}^1, s_{\text{free}}^0, t^0, s_X^0 \rangle$ | 0.01%  | 0.006  | 0.001  | 0.000  |
| 4714.9 | 0.788 | 0.008  | 0.000  | 0.000  | $\langle 446   R^3, b^1, s_{\text{HB}}^0, s_{\text{free}}^0, t^0, s_X^0 \rangle$ | 14.00% | 0.000  | 0.000  | 0.000  |
|        |       |        |        |        | $\langle 446   R^2, b^0, s_{\text{HB}}^1, s_{\text{free}}^0, t^0, s_X^0 \rangle$ | 11.62% | 0.011  | 0.002  | 0.000  |
|        |       |        |        |        | $\langle 446   R^0, b^0, s_{\text{HB}}^2, s_{\text{free}}^0, t^0, s_X^0 \rangle$ | 2.94%  | 0.014  | 0.001  | -0.001 |
|        |       |        |        |        | $\langle 446   R^0, b^0, s_{\text{HB}}^1, s_{\text{free}}^0, t^0, s_X^0 \rangle$ | 0.11%  | -0.018 | -0.002 | 0.000  |
| 4720.8 | 0.079 | -0.003 | -0.000 | -0.000 | $\langle 447   R^4, b^0, s_{\text{HB}}^0, s_{\text{free}}^0, t^1, s_X^0 \rangle$ | 52.31% | 0.000  | 0.000  | 0.000  |
|        |       |        |        |        | $\langle 447   R^2, b^0, s_{\text{HB}}^1, s_{\text{free}}^0, t^0, s_X^0 \rangle$ | 1.50%  | -0.004 | 0.000  | 0.000  |
|        |       |        |        |        | $\langle 447   R^0, b^0, s_{\text{HB}}^2, s_{\text{free}}^0, t^0, s_X^0 \rangle$ | 0.31%  | -0.005 | 0.000  | 0.000  |

|        |       |        |        |        |                                                                                  |        |        |        |        |
|--------|-------|--------|--------|--------|----------------------------------------------------------------------------------|--------|--------|--------|--------|
|        |       |        |        |        | $\langle 447   R^0, b^0, s_{\text{HB}}^1, s_{\text{free}}^0, t^0, s_X^0 \rangle$ | 0.02%  | 0.009  | 0.001  | 0.000  |
| 4768.5 | 0.076 | -0.001 | -0.002 | -0.001 | $\langle 464   R^1, b^0, s_{\text{HB}}^0, s_{\text{free}}^1, t^0, s_X^0 \rangle$ | 42.87% | -0.001 | -0.002 | -0.003 |
|        |       |        |        |        | $\langle 464   R^4, b^0, s_{\text{HB}}^0, s_{\text{free}}^0, t^0, s_X^0 \rangle$ | 20.66% | 0.000  | 0.000  | 0.000  |
|        |       |        |        |        | $\langle 464   R^1, b^0, s_{\text{HB}}^0, s_{\text{free}}^0, t^0, s_X^0 \rangle$ | 0.00%  | 0.000  | -0.001 | 0.001  |
| 4769.6 | 0.055 | -0.000 | -0.002 | -0.001 | $\langle 465   R^1, b^0, s_{\text{HB}}^0, s_{\text{free}}^1, t^0, s_X^0 \rangle$ | 30.17% | 0.000  | -0.001 | -0.002 |
|        |       |        |        |        | $\langle 465   R^4, b^0, s_{\text{HB}}^0, s_{\text{free}}^0, t^0, s_X^0 \rangle$ | 15.04% | 0.000  | 0.000  | 0.000  |
|        |       |        |        |        | $\langle 465   R^1, b^0, s_{\text{HB}}^1, s_{\text{free}}^0, t^5, s_X^0 \rangle$ | 6.58%  | 0.000  | 0.000  | 0.000  |
|        |       |        |        |        | $\langle 465   R^1, b^0, s_{\text{HB}}^0, s_{\text{free}}^1, t^2, s_X^0 \rangle$ | 5.06%  | 0.000  | 0.000  | 0.000  |
|        |       |        |        |        | $\langle 465   R^1, b^0, s_{\text{HB}}^0, s_{\text{free}}^0, t^0, s_X^0 \rangle$ | 0.01%  | 0.001  | -0.001 | 0.002  |
| 4798.5 | 0.077 | 0.002  | -0.001 | -0.000 | $\langle 475   R^5, b^0, s_{\text{HB}}^0, s_{\text{free}}^0, t^0, s_X^0 \rangle$ | 23.16% | 0.000  | 0.001  | -0.001 |
|        |       |        |        |        | $\langle 475   R^3, b^1, s_{\text{HB}}^0, s_{\text{free}}^0, t^0, s_X^0 \rangle$ | 7.32%  | 0.000  | 0.000  | 0.000  |
|        |       |        |        |        | $\langle 475   R^2, b^0, s_{\text{HB}}^1, s_{\text{free}}^0, t^0, s_X^0 \rangle$ | 2.51%  | 0.002  | 0.001  | -0.002 |
|        |       |        |        |        | $\langle 475   R^0, b^0, s_{\text{HB}}^2, s_{\text{free}}^0, t^0, s_X^0 \rangle$ | 0.78%  | 0.007  | 0.000  | 0.000  |
|        |       |        |        |        | $\langle 475   R^0, b^0, s_{\text{HB}}^1, s_{\text{free}}^0, t^0, s_X^0 \rangle$ | 0.08%  | -0.016 | -0.001 | 0.000  |
| 4820.4 | 0.057 | 0.002  | 0.000  | 0.000  | $\langle 483   R^2, b^1, s_{\text{HB}}^0, s_{\text{free}}^0, t^4, s_X^0 \rangle$ | 29.54% | 0.000  | 0.000  | 0.000  |
|        |       |        |        |        | $\langle 483   R^1, b^0, s_{\text{HB}}^1, s_{\text{free}}^0, t^5, s_X^0 \rangle$ | 7.02%  | 0.000  | 0.000  | 0.000  |
|        |       |        |        |        | $\langle 483   R^2, b^0, s_{\text{HB}}^1, s_{\text{free}}^0, t^0, s_X^0 \rangle$ | 0.42%  | -0.001 | 0.000  | 0.000  |
|        |       |        |        |        | $\langle 483   R^0, b^0, s_{\text{HB}}^2, s_{\text{free}}^0, t^0, s_X^0 \rangle$ | 0.10%  | 0.003  | 0.000  | 0.000  |
|        |       |        |        |        | $\langle 483   R^0, b^0, s_{\text{HB}}^1, s_{\text{free}}^0, t^0, s_X^0 \rangle$ | 0.00%  | -0.001 | 0.000  | 0.000  |
| 4821.3 | 0.093 | -0.003 | -0.000 | -0.000 | $\langle 484   R^2, b^1, s_{\text{HB}}^0, s_{\text{free}}^0, t^4, s_X^0 \rangle$ | 12.93% | 0.000  | 0.000  | 0.000  |
|        |       |        |        |        | $\langle 484   R^3, b^1, s_{\text{HB}}^0, s_{\text{free}}^0, t^0, s_X^0 \rangle$ | 8.66%  | 0.000  | 0.000  | 0.000  |
|        |       |        |        |        | $\langle 484   R^2, b^0, s_{\text{HB}}^1, s_{\text{free}}^0, t^0, s_X^0 \rangle$ | 1.05%  | 0.001  | 0.000  | 0.000  |
|        |       |        |        |        | $\langle 484   R^0, b^0, s_{\text{HB}}^2, s_{\text{free}}^0, t^0, s_X^0 \rangle$ | 0.19%  | -0.004 | 0.000  | 0.000  |
|        |       |        |        |        | $\langle 484   R^0, b^0, s_{\text{HB}}^1, s_{\text{free}}^0, t^0, s_X^0 \rangle$ | 0.00%  | 0.002  | 0.000  | 0.000  |
| 4834.0 | 0.559 | -0.007 | -0.001 | -0.000 | $\langle 486   R^3, b^1, s_{\text{HB}}^0, s_{\text{free}}^0, t^0, s_X^0 \rangle$ | 6.20%  | 0.000  | 0.000  | 0.000  |
|        |       |        |        |        | $\langle 486   R^4, b^0, s_{\text{HB}}^0, s_{\text{free}}^0, t^1, s_X^0 \rangle$ | 6.03%  | 0.000  | 0.000  | 0.000  |
|        |       |        |        |        | $\langle 486   R^2, b^0, s_{\text{HB}}^1, s_{\text{free}}^0, t^0, s_X^0 \rangle$ | 4.87%  | 0.003  | 0.000  | 0.000  |
|        |       |        |        |        | $\langle 486   R^0, b^0, s_{\text{HB}}^2, s_{\text{free}}^0, t^1, s_X^0 \rangle$ | 1.57%  | 0.002  | 0.000  | 0.000  |
|        |       |        |        |        | $\langle 486   R^0, b^0, s_{\text{HB}}^2, s_{\text{free}}^0, t^0, s_X^0 \rangle$ | 0.85%  | -0.007 | 0.000  | 0.000  |
| 4838.5 | 0.170 | -0.004 | -0.000 | 0.000  | $\langle 488   R^4, b^0, s_{\text{HB}}^0, s_{\text{free}}^0, t^3, s_X^0 \rangle$ | 17.49% | 0.000  | 0.000  | 0.000  |
|        |       |        |        |        | $\langle 488   R^0, b^0, s_{\text{HB}}^1, s_{\text{free}}^0, t^0, s_X^1 \rangle$ | 5.34%  | -0.003 | -0.001 | 0.000  |
|        |       |        |        |        | $\langle 488   R^0, b^0, s_{\text{HB}}^2, s_{\text{free}}^0, t^0, s_X^0 \rangle$ | 0.05%  | -0.002 | 0.000  | 0.000  |
|        |       |        |        |        | $\langle 488   R^0, b^0, s_{\text{HB}}^1, s_{\text{free}}^0, t^0, s_X^0 \rangle$ | 0.00%  | 0.002  | 0.000  | 0.000  |
| 4840.3 | 0.375 | 0.006  | 0.001  | -0.000 | $\langle 489   R^0, b^0, s_{\text{HB}}^1, s_{\text{free}}^0, t^0, s_X^1 \rangle$ | 31.31% | 0.008  | 0.001  | 0.000  |
|        |       |        |        |        | $\langle 489   R^1, b^1, s_{\text{HB}}^0, s_{\text{free}}^0, t^0, s_X^1 \rangle$ | 12.11% | 0.000  | 0.000  | 0.000  |
|        |       |        |        |        | $\langle 489   R^0, b^0, s_{\text{HB}}^1, s_{\text{free}}^0, t^1, s_X^1 \rangle$ | 6.44%  | 0.000  | 0.000  | 0.000  |
|        |       |        |        |        | $\langle 489   R^2, b^0, s_{\text{HB}}^0, s_{\text{free}}^0, t^0, s_X^1 \rangle$ | 1.59%  | -0.001 | 0.000  | 0.000  |
|        |       |        |        |        | $\langle 489   R^0, b^0, s_{\text{HB}}^0, s_{\text{free}}^0, t^0, s_X^1 \rangle$ | 0.03%  | -0.002 | 0.000  | 0.000  |
| 4850.4 | 0.195 | 0.004  | -0.000 | 0.000  | $\langle 491   R^2, b^0, s_{\text{HB}}^1, s_{\text{free}}^0, t^0, s_X^0 \rangle$ | 17.18% | 0.006  | 0.000  | 0.000  |
|        |       |        |        |        | $\langle 491   R^0, b^0, s_{\text{HB}}^2, s_{\text{free}}^0, t^0, s_X^0 \rangle$ | 0.66%  | 0.007  | 0.000  | 0.000  |
|        |       |        |        |        | $\langle 491   R^0, b^0, s_{\text{HB}}^1, s_{\text{free}}^0, t^0, s_X^0 \rangle$ | 0.02%  | -0.007 | -0.001 | 0.000  |
| 4860.2 | 0.299 | 0.005  | 0.000  | 0.000  | $\langle 492   R^3, b^1, s_{\text{HB}}^0, s_{\text{free}}^0, t^0, s_X^0 \rangle$ | 13.13% | 0.000  | 0.000  | 0.000  |

|        |       |        |        |        |                                                                                |        |        |        |        |
|--------|-------|--------|--------|--------|--------------------------------------------------------------------------------|--------|--------|--------|--------|
|        |       |        |        |        | $\langle 492 R^2, b^0, s_{\text{HB}}^1, s_{\text{free}}^0, t^0, s_X^0 \rangle$ | 2.74%  | 0.005  | 0.001  | 0.000  |
|        |       |        |        |        | $\langle 492 R^0, b^0, s_{\text{HB}}^2, s_{\text{free}}^0, t^0, s_X^0 \rangle$ | 1.05%  | 0.008  | 0.001  | 0.000  |
|        |       |        |        |        | $\langle 492 R^0, b^0, s_{\text{HB}}^1, s_{\text{free}}^0, t^0, s_X^0 \rangle$ | 0.03%  | -0.010 | -0.001 | 0.000  |
| 4863.6 | 0.051 | 0.002  | 0.000  | 0.000  | $\langle 493 R^2, b^0, s_{\text{HB}}^0, s_{\text{free}}^0, t^3, s_X^1 \rangle$ | 72.82% | 0.000  | 0.000  | 0.000  |
|        |       |        |        |        | $\langle 493 R^0, b^0, s_{\text{HB}}^1, s_{\text{free}}^0, t^0, s_X^1 \rangle$ | 0.72%  | 0.001  | 0.000  | 0.000  |
|        |       |        |        |        | $\langle 493 R^0, b^0, s_{\text{HB}}^2, s_{\text{free}}^0, t^0, s_X^0 \rangle$ | 0.08%  | 0.002  | 0.000  | 0.000  |
|        |       |        |        |        | $\langle 493 R^0, b^0, s_{\text{HB}}^1, s_{\text{free}}^0, t^0, s_X^0 \rangle$ | 0.00%  | -0.003 | 0.000  | 0.000  |
| 4878.2 | 0.367 | 0.005  | 0.001  | 0.000  | $\langle 497 R^2, b^0, s_{\text{HB}}^1, s_{\text{free}}^0, t^0, s_X^0 \rangle$ | 27.79% | -0.003 | 0.000  | 0.000  |
|        |       |        |        |        | $\langle 497 R^3, b^1, s_{\text{HB}}^0, s_{\text{free}}^0, t^0, s_X^0 \rangle$ | 19.56% | 0.000  | 0.000  | 0.000  |
|        |       |        |        |        | $\langle 497 R^0, b^0, s_{\text{HB}}^2, s_{\text{free}}^0, t^0, s_X^0 \rangle$ | 1.29%  | 0.009  | 0.001  | -0.001 |
|        |       |        |        |        | $\langle 497 R^0, b^0, s_{\text{HB}}^2, s_{\text{free}}^0, t^1, s_X^0 \rangle$ | 0.72%  | -0.002 | 0.000  | 0.000  |
| 4882.9 | 0.758 | -0.005 | 0.006  | -0.000 | $\langle 501 R^1, b^0, s_{\text{HB}}^0, s_{\text{free}}^1, t^0, s_X^0 \rangle$ | 61.92% | -0.003 | 0.002  | -0.001 |
|        |       |        |        |        | $\langle 501 R^4, b^0, s_{\text{HB}}^0, s_{\text{free}}^0, t^0, s_X^0 \rangle$ | 5.83%  | 0.000  | 0.000  | 0.000  |
|        |       |        |        |        | $\langle 501 R^1, b^0, s_{\text{HB}}^0, s_{\text{free}}^0, t^0, s_X^0 \rangle$ | 0.05%  | -0.002 | 0.003  | -0.005 |
| 4885.2 | 0.323 | -0.003 | 0.004  | -0.000 | $\langle 502 R^4, b^0, s_{\text{HB}}^0, s_{\text{free}}^0, t^0, s_X^0 \rangle$ | 35.62% | 0.000  | 0.000  | 0.000  |
|        |       |        |        |        | $\langle 502 R^1, b^0, s_{\text{HB}}^0, s_{\text{free}}^1, t^0, s_X^0 \rangle$ | 25.99% | -0.002 | 0.001  | -0.001 |
|        |       |        |        |        | $\langle 502 R^2, b^0, s_{\text{HB}}^1, s_{\text{free}}^0, t^0, s_X^0 \rangle$ | 0.32%  | -0.002 | 0.000  | 0.000  |
|        |       |        |        |        | $\langle 502 R^1, b^0, s_{\text{HB}}^0, s_{\text{free}}^0, t^0, s_X^0 \rangle$ | 0.03%  | -0.001 | 0.003  | -0.004 |
|        |       |        |        |        | $\langle 502 R^0, b^0, s_{\text{HB}}^1, s_{\text{free}}^0, t^0, s_X^0 \rangle$ | 0.00%  | 0.002  | 0.000  | 0.000  |
| 4887.5 | 0.167 | 0.004  | -0.000 | -0.000 | $\langle 504 R^3, b^1, s_{\text{HB}}^0, s_{\text{free}}^0, t^1, s_X^0 \rangle$ | 12.21% | 0.000  | 0.000  | 0.000  |
|        |       |        |        |        | $\langle 504 R^5, b^0, s_{\text{HB}}^0, s_{\text{free}}^0, t^0, s_X^0 \rangle$ | 6.75%  | 0.000  | 0.000  | 0.000  |
|        |       |        |        |        | $\langle 504 R^3, b^1, s_{\text{HB}}^0, s_{\text{free}}^0, t^2, s_X^0 \rangle$ | 5.45%  | 0.000  | 0.000  | 0.000  |
|        |       |        |        |        | $\langle 504 R^3, b^0, s_{\text{HB}}^1, s_{\text{free}}^0, t^0, s_X^0 \rangle$ | 1.25%  | 0.000  | 0.001  | -0.001 |
|        |       |        |        |        | $\langle 504 R^0, b^0, s_{\text{HB}}^2, s_{\text{free}}^0, t^0, s_X^0 \rangle$ | 0.43%  | 0.005  | 0.000  | 0.000  |
|        |       |        |        |        | $\langle 504 R^0, b^0, s_{\text{HB}}^1, s_{\text{free}}^0, t^0, s_X^0 \rangle$ | 0.00%  | -0.004 | 0.000  | 0.000  |
| 4893.0 | 0.127 | 0.002  | 0.002  | 0.001  | $\langle 506 R^0, b^3, s_{\text{HB}}^0, s_{\text{free}}^0, t^0, s_X^0 \rangle$ | 76.22% | -0.002 | 0.003  | 0.002  |
|        |       |        |        |        | $\langle 506 R^2, b^2, s_{\text{HB}}^0, s_{\text{free}}^0, t^0, s_X^0 \rangle$ | 5.34%  | 0.000  | 0.000  | 0.000  |
|        |       |        |        |        | $\langle 506 R^0, b^1, s_{\text{HB}}^0, s_{\text{free}}^0, t^0, s_X^0 \rangle$ | 0.08%  | 0.002  | -0.002 | -0.002 |
|        |       |        |        |        | $\langle 506 R^1, b^0, s_{\text{HB}}^0, s_{\text{free}}^0, t^0, s_X^0 \rangle$ | 0.00%  | 0.001  | -0.001 | 0.001  |
| 4924.8 | 0.110 | -0.003 | -0.000 | -0.000 | $\langle 519 R^4, b^0, s_{\text{HB}}^0, s_{\text{free}}^0, t^2, s_X^0 \rangle$ | 38.84% | 0.000  | 0.000  | 0.000  |
|        |       |        |        |        | $\langle 519 R^0, b^0, s_{\text{HB}}^2, s_{\text{free}}^0, t^0, s_X^0 \rangle$ | 0.34%  | -0.005 | 0.000  | 0.000  |
|        |       |        |        |        | $\langle 519 R^2, b^0, s_{\text{HB}}^1, s_{\text{free}}^0, t^0, s_X^0 \rangle$ | 0.15%  | -0.001 | 0.000  | 0.000  |
|        |       |        |        |        | $\langle 519 R^0, b^0, s_{\text{HB}}^1, s_{\text{free}}^0, t^0, s_X^0 \rangle$ | 0.00%  | 0.003  | 0.000  | 0.000  |
| 4925.8 | 0.068 | 0.002  | 0.000  | 0.000  | $\langle 520 R^2, b^0, s_{\text{HB}}^0, s_{\text{free}}^0, t^2, s_X^1 \rangle$ | 32.79% | 0.000  | 0.000  | 0.000  |
|        |       |        |        |        | $\langle 520 R^1, b^1, s_{\text{HB}}^0, s_{\text{free}}^0, t^1, s_X^1 \rangle$ | 26.87% | 0.000  | 0.000  | 0.000  |
|        |       |        |        |        | $\langle 520 R^0, b^0, s_{\text{HB}}^1, s_{\text{free}}^0, t^0, s_X^1 \rangle$ | 0.88%  | 0.001  | 0.000  | 0.000  |
|        |       |        |        |        | $\langle 520 R^2, b^0, s_{\text{HB}}^1, s_{\text{free}}^0, t^0, s_X^0 \rangle$ | 0.10%  | 0.001  | 0.000  | 0.000  |
|        |       |        |        |        | $\langle 520 R^0, b^0, s_{\text{HB}}^2, s_{\text{free}}^0, t^0, s_X^0 \rangle$ | 0.06%  | 0.002  | 0.000  | 0.000  |
| 4932.3 | 0.306 | 0.005  | 0.000  | 0.000  | $\langle 523 R^3, b^1, s_{\text{HB}}^0, s_{\text{free}}^0, t^2, s_X^0 \rangle$ | 5.54%  | 0.000  | 0.000  | 0.000  |
|        |       |        |        |        | $\langle 523 R^2, b^0, s_{\text{HB}}^1, s_{\text{free}}^0, t^0, s_X^0 \rangle$ | 1.08%  | 0.002  | 0.000  | 0.000  |
|        |       |        |        |        | $\langle 523 R^0, b^0, s_{\text{HB}}^2, s_{\text{free}}^0, t^0, s_X^0 \rangle$ | 0.72%  | 0.007  | 0.000  | 0.000  |

|        |       |        |        |        |                                                                                |        |        |        |        |
|--------|-------|--------|--------|--------|--------------------------------------------------------------------------------|--------|--------|--------|--------|
|        |       |        |        |        | $\langle 523 R^0, b^0, s_{\text{HB}}^1, s_{\text{free}}^0, t^0, s_X^0 \rangle$ | 0.00%  | -0.002 | 0.000  | 0.000  |
| 4937.8 | 0.164 | -0.004 | -0.000 | -0.000 | $\langle 525 R^4, b^0, s_{\text{HB}}^0, s_{\text{free}}^0, t^1, s_X^0 \rangle$ | 12.60% | 0.000  | 0.000  | 0.000  |
|        |       |        |        |        | $\langle 525 R^1, b^2, s_{\text{HB}}^0, s_{\text{free}}^0, t^2, s_X^0 \rangle$ | 6.31%  | 0.000  | 0.000  | 0.000  |
|        |       |        |        |        | $\langle 525 R^2, b^0, s_{\text{HB}}^1, s_{\text{free}}^0, t^0, s_X^0 \rangle$ | 2.67%  | -0.002 | 0.000  | 0.000  |
|        |       |        |        |        | $\langle 525 R^0, b^0, s_{\text{HB}}^2, s_{\text{free}}^0, t^0, s_X^0 \rangle$ | 1.08%  | -0.008 | -0.001 | 0.000  |
|        |       |        |        |        | $\langle 525 R^0, b^0, s_{\text{HB}}^1, s_{\text{free}}^0, t^0, s_X^0 \rangle$ | 0.02%  | 0.008  | 0.001  | 0.000  |
| 4938.3 | 0.217 | 0.004  | 0.000  | 0.000  | $\langle 526 R^4, b^0, s_{\text{HB}}^0, s_{\text{free}}^0, t^2, s_X^0 \rangle$ | 22.73% | 0.000  | 0.000  | 0.000  |
|        |       |        |        |        | $\langle 526 R^2, b^0, s_{\text{HB}}^1, s_{\text{free}}^0, t^0, s_X^0 \rangle$ | 0.66%  | -0.002 | 0.000  | 0.000  |
|        |       |        |        |        | $\langle 526 R^0, b^0, s_{\text{HB}}^2, s_{\text{free}}^0, t^0, s_X^0 \rangle$ | 0.23%  | 0.004  | 0.000  | 0.000  |
|        |       |        |        |        | $\langle 526 R^0, b^0, s_{\text{HB}}^1, s_{\text{free}}^0, t^0, s_X^0 \rangle$ | 0.00%  | 0.003  | 0.000  | 0.000  |
| 4940.0 | 0.157 | -0.004 | -0.000 | -0.000 | $\langle 527 R^1, b^2, s_{\text{HB}}^0, s_{\text{free}}^0, t^2, s_X^0 \rangle$ | 49.08% | 0.000  | 0.000  | 0.000  |
|        |       |        |        |        | $\langle 527 R^0, b^0, s_{\text{HB}}^1, s_{\text{free}}^0, t^0, s_X^1 \rangle$ | 0.97%  | -0.001 | 0.000  | 0.000  |
|        |       |        |        |        | $\langle 527 R^0, b^0, s_{\text{HB}}^2, s_{\text{free}}^0, t^0, s_X^0 \rangle$ | 0.39%  | -0.005 | 0.000  | 0.000  |
|        |       |        |        |        | $\langle 527 R^0, b^0, s_{\text{HB}}^1, s_{\text{free}}^0, t^0, s_X^0 \rangle$ | 0.00%  | 0.004  | 0.000  | 0.000  |
| 4940.1 | 0.060 | -0.002 | -0.000 | 0.000  | $\langle 528 R^1, b^1, s_{\text{HB}}^0, s_{\text{free}}^0, t^0, s_X^1 \rangle$ | 22.86% | 0.000  | 0.000  | 0.000  |
|        |       |        |        |        | $\langle 528 R^2, b^0, s_{\text{HB}}^0, s_{\text{free}}^0, t^2, s_X^1 \rangle$ | 14.32% | 0.000  | 0.000  | 0.000  |
|        |       |        |        |        | $\langle 528 R^1, b^2, s_{\text{HB}}^0, s_{\text{free}}^0, t^2, s_X^0 \rangle$ | 13.39% | 0.000  | 0.000  | 0.000  |
|        |       |        |        |        | $\langle 528 R^0, b^0, s_{\text{HB}}^1, s_{\text{free}}^0, t^0, s_X^1 \rangle$ | 7.95%  | -0.004 | -0.001 | 0.000  |
|        |       |        |        |        | $\langle 528 R^0, b^0, s_{\text{HB}}^0, s_{\text{free}}^0, t^0, s_X^1 \rangle$ | 0.02%  | 0.001  | 0.000  | 0.000  |
|        |       |        |        |        | $\langle 528 R^0, b^0, s_{\text{HB}}^1, s_{\text{free}}^0, t^0, s_X^0 \rangle$ | 0.00%  | -0.001 | 0.000  | 0.000  |
| 4948.1 | 0.056 | -0.002 | -0.000 | -0.000 | $\langle 530 R^4, b^0, s_{\text{HB}}^0, s_{\text{free}}^0, t^2, s_X^0 \rangle$ | 23.77% | 0.000  | 0.000  | 0.000  |
|        |       |        |        |        | $\langle 530 R^2, b^0, s_{\text{HB}}^1, s_{\text{free}}^0, t^0, s_X^0 \rangle$ | 0.69%  | 0.002  | 0.000  | 0.000  |
|        |       |        |        |        | $\langle 530 R^0, b^0, s_{\text{HB}}^2, s_{\text{free}}^0, t^0, s_X^0 \rangle$ | 0.15%  | -0.003 | 0.000  | 0.000  |
|        |       |        |        |        | $\langle 530 R^0, b^0, s_{\text{HB}}^1, s_{\text{free}}^0, t^0, s_X^0 \rangle$ | 0.00%  | -0.004 | 0.000  | 0.000  |
| 4950.2 | 0.775 | 0.008  | 0.001  | 0.000  | $\langle 531 R^3, b^1, s_{\text{HB}}^0, s_{\text{free}}^0, t^0, s_X^0 \rangle$ | 14.31% | 0.000  | 0.000  | 0.000  |
|        |       |        |        |        | $\langle 531 R^2, b^0, s_{\text{HB}}^1, s_{\text{free}}^0, t^1, s_X^0 \rangle$ | 5.93%  | 0.000  | 0.000  | 0.000  |
|        |       |        |        |        | $\langle 531 R^0, b^0, s_{\text{HB}}^2, s_{\text{free}}^0, t^0, s_X^0 \rangle$ | 3.08%  | 0.014  | 0.001  | -0.001 |
|        |       |        |        |        | $\langle 531 R^2, b^0, s_{\text{HB}}^1, s_{\text{free}}^0, t^0, s_X^0 \rangle$ | 2.66%  | 0.003  | 0.000  | 0.000  |
|        |       |        |        |        | $\langle 531 R^0, b^0, s_{\text{HB}}^1, s_{\text{free}}^0, t^0, s_X^0 \rangle$ | 0.01%  | -0.006 | -0.001 | 0.000  |
| 4952.2 | 0.402 | -0.006 | -0.001 | -0.000 | $\langle 532 R^4, b^0, s_{\text{HB}}^0, s_{\text{free}}^0, t^1, s_X^0 \rangle$ | 15.20% | 0.000  | 0.000  | 0.000  |
|        |       |        |        |        | $\langle 532 R^2, b^0, s_{\text{HB}}^1, s_{\text{free}}^0, t^0, s_X^0 \rangle$ | 2.79%  | 0.001  | 0.000  | 0.000  |
|        |       |        |        |        | $\langle 532 R^0, b^0, s_{\text{HB}}^2, s_{\text{free}}^0, t^0, s_X^0 \rangle$ | 1.52%  | -0.010 | -0.001 | 0.001  |
| 4958.9 | 0.340 | -0.005 | -0.000 | -0.000 | $\langle 534 R^4, b^0, s_{\text{HB}}^0, s_{\text{free}}^0, t^1, s_X^0 \rangle$ | 12.97% | 0.000  | 0.000  | 0.000  |
|        |       |        |        |        | $\langle 534 R^3, b^1, s_{\text{HB}}^0, s_{\text{free}}^0, t^0, s_X^0 \rangle$ | 11.25% | 0.000  | 0.000  | 0.000  |
|        |       |        |        |        | $\langle 534 R^2, b^0, s_{\text{HB}}^1, s_{\text{free}}^0, t^0, s_X^0 \rangle$ | 2.82%  | -0.002 | 0.000  | 0.000  |
|        |       |        |        |        | $\langle 534 R^0, b^0, s_{\text{HB}}^2, s_{\text{free}}^0, t^0, s_X^0 \rangle$ | 1.19%  | -0.009 | -0.001 | 0.001  |
|        |       |        |        |        | $\langle 534 R^0, b^0, s_{\text{HB}}^1, s_{\text{free}}^0, t^0, s_X^0 \rangle$ | 0.02%  | 0.008  | 0.001  | 0.000  |
| 4975.1 | 1.242 | -0.010 | -0.001 | -0.000 | $\langle 537 R^4, b^0, s_{\text{HB}}^0, s_{\text{free}}^0, t^3, s_X^0 \rangle$ | 21.87% | 0.000  | 0.000  | 0.000  |
|        |       |        |        |        | $\langle 537 R^0, b^0, s_{\text{HB}}^2, s_{\text{free}}^0, t^0, s_X^0 \rangle$ | 3.87%  | -0.016 | -0.001 | 0.001  |
|        |       |        |        |        | $\langle 537 R^0, b^0, s_{\text{HB}}^2, s_{\text{free}}^0, t^1, s_X^0 \rangle$ | 1.99%  | 0.003  | 0.000  | 0.000  |
|        |       |        |        |        | $\langle 537 R^2, b^0, s_{\text{HB}}^1, s_{\text{free}}^0, t^0, s_X^0 \rangle$ | 1.83%  | 0.004  | 0.000  | 0.000  |
| 4976.5 | 0.403 | 0.006  | 0.000  | 0.000  | $\langle 538 R^4, b^0, s_{\text{HB}}^0, s_{\text{free}}^0, t^3, s_X^0 \rangle$ | 9.38%  | 0.000  | 0.000  | 0.000  |

|        |       |        |        |        |                                                                                  |        |        |        |        |
|--------|-------|--------|--------|--------|----------------------------------------------------------------------------------|--------|--------|--------|--------|
|        |       |        |        |        | $\langle 538   R^2, b^0, s_{\text{HB}}^1, s_{\text{free}}^0, t^0, s_X^0 \rangle$ | 2.07%  | -0.005 | 0.000  | 0.000  |
|        |       |        |        |        | $\langle 538   R^0, b^0, s_{\text{HB}}^2, s_{\text{free}}^0, t^0, s_X^0 \rangle$ | 1.37%  | 0.009  | 0.001  | -0.001 |
| 5016.7 | 0.219 | 0.004  | 0.000  | 0.000  | $\langle 554   R^3, b^1, s_{\text{HB}}^0, s_{\text{free}}^0, t^1, s_X^0 \rangle$ | 18.31% | 0.000  | 0.000  | 0.000  |
|        |       |        |        |        | $\langle 554   R^2, b^0, s_{\text{HB}}^1, s_{\text{free}}^0, t^2, s_X^0 \rangle$ | 5.01%  | 0.000  | 0.000  | 0.000  |
|        |       |        |        |        | $\langle 554   R^0, b^0, s_{\text{HB}}^2, s_{\text{free}}^0, t^1, s_X^0 \rangle$ | 2.41%  | -0.003 | 0.000  | 0.000  |
|        |       |        |        |        | $\langle 554   R^0, b^0, s_{\text{HB}}^2, s_{\text{free}}^0, t^0, s_X^0 \rangle$ | 0.25%  | 0.004  | 0.000  | 0.000  |
|        |       |        |        |        | $\langle 554   R^0, b^0, s_{\text{HB}}^1, s_{\text{free}}^0, t^0, s_X^0 \rangle$ | 0.01%  | 0.006  | 0.001  | 0.000  |
| 5033.9 | 0.570 | -0.007 | -0.001 | -0.000 | $\langle 558   R^4, b^0, s_{\text{HB}}^0, s_{\text{free}}^0, t^0, s_X^0 \rangle$ | 36.73% | 0.000  | 0.000  | 0.000  |
|        |       |        |        |        | $\langle 558   R^2, b^0, s_{\text{HB}}^1, s_{\text{free}}^0, t^0, s_X^0 \rangle$ | 4.37%  | -0.001 | 0.000  | 0.000  |
|        |       |        |        |        | $\langle 558   R^0, b^0, s_{\text{HB}}^2, s_{\text{free}}^0, t^0, s_X^0 \rangle$ | 1.32%  | -0.009 | -0.001 | 0.001  |
| 5034.2 | 0.409 | 0.006  | 0.000  | 0.000  | $\langle 559   R^2, b^0, s_{\text{HB}}^0, s_{\text{free}}^0, t^1, s_X^1 \rangle$ | 19.49% | 0.000  | 0.000  | 0.000  |
|        |       |        |        |        | $\langle 559   R^4, b^0, s_{\text{HB}}^0, s_{\text{free}}^0, t^0, s_X^0 \rangle$ | 5.33%  | 0.000  | 0.000  | 0.000  |
|        |       |        |        |        | $\langle 559   R^0, b^0, s_{\text{HB}}^1, s_{\text{free}}^0, t^0, s_X^1 \rangle$ | 4.33%  | 0.003  | 0.001  | 0.000  |
|        |       |        |        |        | $\langle 559   R^0, b^0, s_{\text{HB}}^2, s_{\text{free}}^0, t^0, s_X^0 \rangle$ | 0.61%  | 0.006  | 0.000  | 0.000  |
|        |       |        |        |        | $\langle 559   R^0, b^0, s_{\text{HB}}^0, s_{\text{free}}^0, t^0, s_X^1 \rangle$ | 0.04%  | -0.002 | 0.000  | 0.000  |
| 5040.2 | 0.480 | -0.006 | -0.000 | -0.000 | $\langle 561   R^4, b^0, s_{\text{HB}}^0, s_{\text{free}}^0, t^2, s_X^0 \rangle$ | 35.14% | 0.000  | 0.000  | 0.000  |
|        |       |        |        |        | $\langle 561   R^0, b^0, s_{\text{HB}}^2, s_{\text{free}}^0, t^0, s_X^0 \rangle$ | 1.79%  | -0.011 | -0.001 | 0.001  |
|        |       |        |        |        | $\langle 561   R^0, b^0, s_{\text{HB}}^2, s_{\text{free}}^0, t^1, s_X^0 \rangle$ | 0.59%  | 0.001  | 0.000  | 0.000  |
|        |       |        |        |        | $\langle 561   R^0, b^0, s_{\text{HB}}^1, s_{\text{free}}^0, t^0, s_X^0 \rangle$ | 0.00%  | 0.001  | 0.000  | 0.000  |
| 5041.1 | 0.075 | 0.002  | 0.000  | 0.000  | $\langle 562   R^2, b^0, s_{\text{HB}}^1, s_{\text{free}}^0, t^0, s_X^0 \rangle$ | 13.64% | -0.001 | 0.000  | 0.000  |
|        |       |        |        |        | $\langle 562   R^0, b^0, s_{\text{HB}}^2, s_{\text{free}}^0, t^0, s_X^0 \rangle$ | 0.20%  | 0.004  | 0.000  | 0.000  |
|        |       |        |        |        | $\langle 562   R^0, b^0, s_{\text{HB}}^1, s_{\text{free}}^0, t^0, s_X^0 \rangle$ | 0.00%  | 0.001  | 0.000  | 0.000  |
| 5043.0 | 0.380 | 0.005  | 0.001  | 0.000  | $\langle 563   R^2, b^0, s_{\text{HB}}^0, s_{\text{free}}^0, t^1, s_X^1 \rangle$ | 38.89% | 0.000  | 0.000  | 0.000  |
|        |       |        |        |        | $\langle 563   R^1, b^1, s_{\text{HB}}^0, s_{\text{free}}^0, t^1, s_X^1 \rangle$ | 12.57% | 0.000  | 0.000  | 0.000  |
|        |       |        |        |        | $\langle 563   R^0, b^0, s_{\text{HB}}^1, s_{\text{free}}^0, t^0, s_X^1 \rangle$ | 7.26%  | 0.004  | 0.001  | 0.000  |
|        |       |        |        |        | $\langle 563   R^0, b^0, s_{\text{HB}}^1, s_{\text{free}}^0, t^1, s_X^1 \rangle$ | 5.65%  | 0.000  | 0.000  | 0.000  |
|        |       |        |        |        | $\langle 563   R^0, b^0, s_{\text{HB}}^2, s_{\text{free}}^0, t^0, s_X^0 \rangle$ | 0.51%  | 0.006  | 0.000  | 0.000  |
|        |       |        |        |        | $\langle 563   R^0, b^0, s_{\text{HB}}^0, s_{\text{free}}^0, t^0, s_X^1 \rangle$ | 0.06%  | -0.003 | -0.001 | 0.000  |
| 5049.8 | 0.180 | 0.004  | 0.000  | 0.000  | $\langle 565   R^4, b^0, s_{\text{HB}}^0, s_{\text{free}}^0, t^3, s_X^0 \rangle$ | 43.89% | 0.000  | 0.000  | 0.000  |
|        |       |        |        |        | $\langle 565   R^0, b^0, s_{\text{HB}}^2, s_{\text{free}}^0, t^0, s_X^0 \rangle$ | 0.54%  | 0.006  | 0.000  | 0.000  |
|        |       |        |        |        | $\langle 565   R^2, b^0, s_{\text{HB}}^1, s_{\text{free}}^0, t^0, s_X^0 \rangle$ | 0.43%  | -0.001 | 0.000  | 0.000  |
|        |       |        |        |        | $\langle 565   R^0, b^0, s_{\text{HB}}^2, s_{\text{free}}^0, t^1, s_X^0 \rangle$ | 0.39%  | -0.001 | 0.000  | 0.000  |
| 5054.6 | 0.834 | -0.008 | -0.001 | -0.000 | $\langle 566   R^4, b^0, s_{\text{HB}}^0, s_{\text{free}}^0, t^2, s_X^0 \rangle$ | 4.74%  | 0.000  | 0.000  | 0.000  |
|        |       |        |        |        | $\langle 566   R^0, b^0, s_{\text{HB}}^2, s_{\text{free}}^0, t^0, s_X^0 \rangle$ | 3.55%  | -0.015 | -0.001 | 0.001  |
|        |       |        |        |        | $\langle 566   R^2, b^0, s_{\text{HB}}^1, s_{\text{free}}^0, t^0, s_X^0 \rangle$ | 0.36%  | -0.002 | 0.000  | 0.000  |
|        |       |        |        |        | $\langle 566   R^0, b^0, s_{\text{HB}}^1, s_{\text{free}}^0, t^0, s_X^0 \rangle$ | 0.02%  | 0.008  | 0.001  | 0.000  |
| 5062.0 | 0.314 | -0.005 | -0.000 | -0.000 | $\langle 569   R^0, b^3, s_{\text{HB}}^0, s_{\text{free}}^0, t^1, s_X^0 \rangle$ | 47.53% | 0.000  | 0.000  | 0.000  |
|        |       |        |        |        | $\langle 569   R^0, b^0, s_{\text{HB}}^2, s_{\text{free}}^0, t^0, s_X^0 \rangle$ | 1.06%  | -0.008 | -0.001 | 0.000  |
|        |       |        |        |        | $\langle 569   R^2, b^0, s_{\text{HB}}^1, s_{\text{free}}^0, t^0, s_X^0 \rangle$ | 0.51%  | 0.001  | 0.000  | 0.000  |
|        |       |        |        |        | $\langle 569   R^0, b^0, s_{\text{HB}}^1, s_{\text{free}}^0, t^0, s_X^0 \rangle$ | 0.00%  | 0.004  | 0.000  | 0.000  |
| 5076.6 | 0.329 | 0.005  | -0.000 | -0.000 | $\langle 573   R^1, b^1, s_{\text{HB}}^0, s_{\text{free}}^0, t^0, s_X^1 \rangle$ | 13.67% | -0.001 | 0.000  | 0.000  |
|        |       |        |        |        | $\langle 573   R^1, b^0, s_{\text{HB}}^0, s_{\text{free}}^1, t^2, s_X^0 \rangle$ | 9.37%  | 0.000  | 0.000  | 0.000  |

|        |       |        |        |        |                                                                                |        |        |        |       |
|--------|-------|--------|--------|--------|--------------------------------------------------------------------------------|--------|--------|--------|-------|
|        |       |        |        |        | $\langle 573 R^4, b^0, s_{\text{HB}}^0, s_{\text{free}}^0, t^2, s_X^0 \rangle$ | 9.14%  | 0.000  | 0.000  | 0.000 |
|        |       |        |        |        | $\langle 573 R^2, b^2, s_{\text{HB}}^0, s_{\text{free}}^0, t^0, s_X^0 \rangle$ | 7.03%  | 0.000  | 0.000  | 0.000 |
|        |       |        |        |        | $\langle 573 R^0, b^0, s_{\text{HB}}^2, s_{\text{free}}^0, t^0, s_X^0 \rangle$ | 0.92%  | 0.008  | 0.000  | 0.000 |
|        |       |        |        |        | $\langle 573 R^0, b^0, s_{\text{HB}}^2, s_{\text{free}}^0, t^1, s_X^0 \rangle$ | 0.61%  | -0.001 | 0.000  | 0.000 |
|        |       |        |        |        | $\langle 573 R^0, b^0, s_{\text{HB}}^1, s_{\text{free}}^0, t^0, s_X^0 \rangle$ | 0.00%  | -0.002 | 0.000  | 0.000 |
| 5076.9 | 0.143 | -0.003 | -0.000 | -0.000 | $\langle 574 R^1, b^1, s_{\text{HB}}^0, s_{\text{free}}^0, t^0, s_X^1 \rangle$ | 60.30% | -0.001 | 0.000  | 0.000 |
|        |       |        |        |        | $\langle 574 R^0, b^0, s_{\text{HB}}^2, s_{\text{free}}^0, t^0, s_X^0 \rangle$ | 0.39%  | -0.005 | 0.000  | 0.000 |
|        |       |        |        |        | $\langle 574 R^0, b^0, s_{\text{HB}}^0, s_{\text{free}}^0, t^0, s_X^1 \rangle$ | 0.02%  | 0.002  | 0.000  | 0.000 |
|        |       |        |        |        | $\langle 574 R^0, b^0, s_{\text{HB}}^1, s_{\text{free}}^0, t^0, s_X^0 \rangle$ | 0.00%  | 0.001  | 0.000  | 0.000 |
| 5077.9 | 0.253 | -0.004 | 0.000  | -0.000 | $\langle 576 R^1, b^0, s_{\text{HB}}^0, s_{\text{free}}^1, t^2, s_X^0 \rangle$ | 39.91% | 0.000  | 0.000  | 0.000 |
|        |       |        |        |        | $\langle 576 R^4, b^0, s_{\text{HB}}^0, s_{\text{free}}^0, t^2, s_X^0 \rangle$ | 6.68%  | 0.000  | 0.000  | 0.000 |
|        |       |        |        |        | $\langle 576 R^0, b^0, s_{\text{HB}}^2, s_{\text{free}}^0, t^0, s_X^0 \rangle$ | 0.82%  | -0.007 | 0.000  | 0.000 |
|        |       |        |        |        | $\langle 576 R^0, b^0, s_{\text{HB}}^2, s_{\text{free}}^0, t^1, s_X^0 \rangle$ | 0.28%  | 0.001  | 0.000  | 0.000 |
|        |       |        |        |        | $\langle 576 R^0, b^0, s_{\text{HB}}^1, s_{\text{free}}^0, t^0, s_X^0 \rangle$ | 0.00%  | 0.003  | 0.000  | 0.000 |
| 5091.9 | 0.172 | -0.004 | -0.000 | -0.000 | $\langle 583 R^4, b^0, s_{\text{HB}}^0, s_{\text{free}}^0, t^1, s_X^0 \rangle$ | 16.18% | 0.000  | 0.000  | 0.000 |
|        |       |        |        |        | $\langle 583 R^3, b^1, s_{\text{HB}}^0, s_{\text{free}}^0, t^1, s_X^0 \rangle$ | 13.81% | 0.000  | 0.000  | 0.000 |
|        |       |        |        |        | $\langle 583 R^2, b^0, s_{\text{HB}}^1, s_{\text{free}}^0, t^1, s_X^0 \rangle$ | 8.77%  | 0.000  | 0.000  | 0.000 |
|        |       |        |        |        | $\langle 583 R^0, b^0, s_{\text{HB}}^2, s_{\text{free}}^0, t^0, s_X^0 \rangle$ | 1.02%  | -0.008 | -0.001 | 0.000 |
|        |       |        |        |        | $\langle 583 R^2, b^0, s_{\text{HB}}^1, s_{\text{free}}^0, t^0, s_X^0 \rangle$ | 0.58%  | 0.001  | 0.000  | 0.000 |
|        |       |        |        |        | $\langle 583 R^0, b^0, s_{\text{HB}}^1, s_{\text{free}}^0, t^0, s_X^0 \rangle$ | 0.01%  | 0.005  | 0.000  | 0.000 |
| 5105.8 | 0.123 | -0.003 | -0.000 | -0.000 | $\langle 588 R^5, b^0, s_{\text{HB}}^0, s_{\text{free}}^0, t^1, s_X^0 \rangle$ | 26.04% | 0.000  | 0.000  | 0.000 |
|        |       |        |        |        | $\langle 588 R^3, b^1, s_{\text{HB}}^0, s_{\text{free}}^0, t^2, s_X^0 \rangle$ | 7.68%  | 0.000  | 0.000  | 0.000 |
|        |       |        |        |        | $\langle 588 R^3, b^0, s_{\text{HB}}^0, s_{\text{free}}^0, t^0, s_X^1 \rangle$ | 5.86%  | 0.000  | 0.000  | 0.000 |
|        |       |        |        |        | $\langle 588 R^0, b^0, s_{\text{HB}}^2, s_{\text{free}}^0, t^0, s_X^0 \rangle$ | 0.53%  | -0.006 | 0.000  | 0.000 |
|        |       |        |        |        | $\langle 588 R^0, b^0, s_{\text{HB}}^1, s_{\text{free}}^0, t^1, s_X^0 \rangle$ | 0.02%  | -0.001 | 0.000  | 0.000 |
|        |       |        |        |        | $\langle 588 R^0, b^0, s_{\text{HB}}^1, s_{\text{free}}^0, t^0, s_X^0 \rangle$ | 0.01%  | 0.005  | 0.000  | 0.000 |
| 5128.4 | 0.051 | -0.002 | -0.000 | -0.000 | $\langle 597 R^3, b^1, s_{\text{HB}}^0, s_{\text{free}}^0, t^2, s_X^0 \rangle$ | 14.81% | 0.000  | 0.000  | 0.000 |
|        |       |        |        |        | $\langle 597 R^5, b^0, s_{\text{HB}}^0, s_{\text{free}}^0, t^0, s_X^0 \rangle$ | 9.22%  | 0.000  | 0.000  | 0.000 |
|        |       |        |        |        | $\langle 597 R^0, b^0, s_{\text{HB}}^2, s_{\text{free}}^0, t^0, s_X^0 \rangle$ | 0.50%  | -0.006 | 0.000  | 0.000 |
|        |       |        |        |        | $\langle 597 R^2, b^0, s_{\text{HB}}^1, s_{\text{free}}^0, t^0, s_X^0 \rangle$ | 0.05%  | 0.001  | 0.000  | 0.000 |
|        |       |        |        |        | $\langle 597 R^0, b^0, s_{\text{HB}}^1, s_{\text{free}}^0, t^0, s_X^0 \rangle$ | 0.00%  | 0.002  | 0.000  | 0.000 |
| 5135.8 | 0.103 | -0.003 | -0.000 | -0.000 | $\langle 600 R^3, b^1, s_{\text{HB}}^0, s_{\text{free}}^0, t^0, s_X^0 \rangle$ | 22.72% | 0.000  | 0.000  | 0.000 |
|        |       |        |        |        | $\langle 600 R^0, b^0, s_{\text{HB}}^2, s_{\text{free}}^0, t^0, s_X^0 \rangle$ | 0.43%  | -0.005 | 0.000  | 0.000 |
|        |       |        |        |        | $\langle 600 R^2, b^0, s_{\text{HB}}^1, s_{\text{free}}^0, t^0, s_X^0 \rangle$ | 0.30%  | -0.001 | 0.000  | 0.000 |
|        |       |        |        |        | $\langle 600 R^0, b^0, s_{\text{HB}}^1, s_{\text{free}}^0, t^0, s_X^0 \rangle$ | 0.00%  | 0.001  | 0.000  | 0.000 |
| 5137.9 | 0.067 | -0.002 | -0.000 | -0.000 | $\langle 601 R^2, b^0, s_{\text{HB}}^1, s_{\text{free}}^0, t^2, s_X^0 \rangle$ | 4.48%  | 0.000  | 0.000  | 0.000 |
|        |       |        |        |        | $\langle 601 R^0, b^0, s_{\text{HB}}^2, s_{\text{free}}^0, t^0, s_X^0 \rangle$ | 0.54%  | -0.006 | 0.000  | 0.000 |
|        |       |        |        |        | $\langle 601 R^2, b^0, s_{\text{HB}}^1, s_{\text{free}}^0, t^0, s_X^0 \rangle$ | 0.49%  | 0.002  | 0.000  | 0.000 |
|        |       |        |        |        | $\langle 601 R^0, b^0, s_{\text{HB}}^1, s_{\text{free}}^0, t^1, s_X^0 \rangle$ | 0.03%  | 0.001  | 0.000  | 0.000 |
| 5141.4 | 0.069 | 0.002  | 0.000  | 0.000  | $\langle 602 R^3, b^1, s_{\text{HB}}^0, s_{\text{free}}^0, t^0, s_X^0 \rangle$ | 5.39%  | 0.000  | 0.000  | 0.000 |
|        |       |        |        |        | $\langle 602 R^2, b^0, s_{\text{HB}}^1, s_{\text{free}}^0, t^0, s_X^0 \rangle$ | 0.66%  | 0.001  | 0.000  | 0.000 |
|        |       |        |        |        | $\langle 602 R^0, b^0, s_{\text{HB}}^2, s_{\text{free}}^0, t^0, s_X^0 \rangle$ | 0.36%  | 0.005  | 0.000  | 0.000 |

|        |       |        |        |        |                                                                                |        |        |        |        |
|--------|-------|--------|--------|--------|--------------------------------------------------------------------------------|--------|--------|--------|--------|
|        |       |        |        |        | $\langle 602 R^0, b^0, s_{\text{HB}}^1, s_{\text{free}}^0, t^0, s_X^0 \rangle$ | 0.00%  | -0.002 | 0.000  | 0.000  |
| 5147.5 | 0.633 | 0.007  | 0.000  | 0.000  | $\langle 604 R^1, b^1, s_{\text{HB}}^1, s_{\text{free}}^0, t^0, s_X^0 \rangle$ | 8.63%  | -0.001 | -0.001 | 0.001  |
|        |       |        |        |        | $\langle 604 R^2, b^2, s_{\text{HB}}^0, s_{\text{free}}^0, t^0, s_X^0 \rangle$ | 7.46%  | 0.000  | 0.000  | 0.000  |
|        |       |        |        |        | $\langle 604 R^0, b^0, s_{\text{HB}}^2, s_{\text{free}}^0, t^0, s_X^0 \rangle$ | 1.69%  | 0.011  | 0.001  | -0.001 |
|        |       |        |        |        | $\langle 604 R^0, b^0, s_{\text{HB}}^2, s_{\text{free}}^0, t^1, s_X^0 \rangle$ | 1.58%  | -0.002 | 0.000  | 0.000  |
| 5150.2 | 0.251 | 0.004  | 0.000  | 0.000  | $\langle 606 R^2, b^0, s_{\text{HB}}^1, s_{\text{free}}^0, t^0, s_X^0 \rangle$ | 9.52%  | -0.002 | 0.000  | 0.000  |
|        |       |        |        |        | $\langle 606 R^2, b^0, s_{\text{HB}}^0, s_{\text{free}}^0, t^3, s_X^1 \rangle$ | 6.82%  | 0.000  | 0.000  | 0.000  |
|        |       |        |        |        | $\langle 606 R^0, b^0, s_{\text{HB}}^2, s_{\text{free}}^0, t^0, s_X^0 \rangle$ | 0.75%  | 0.007  | 0.000  | 0.000  |
|        |       |        |        |        | $\langle 606 R^0, b^0, s_{\text{HB}}^1, s_{\text{free}}^0, t^0, s_X^0 \rangle$ | 0.00%  | -0.002 | 0.000  | 0.000  |
| 5152.9 | 0.170 | -0.004 | -0.000 | 0.000  | $\langle 607 R^3, b^1, s_{\text{HB}}^0, s_{\text{free}}^0, t^1, s_X^0 \rangle$ | 12.60% | 0.000  | 0.000  | 0.000  |
|        |       |        |        |        | $\langle 607 R^4, b^0, s_{\text{HB}}^0, s_{\text{free}}^0, t^3, s_X^0 \rangle$ | 5.68%  | 0.000  | 0.000  | 0.000  |
|        |       |        |        |        | $\langle 607 R^0, b^0, s_{\text{HB}}^2, s_{\text{free}}^0, t^0, s_X^0 \rangle$ | 0.71%  | -0.007 | 0.000  | 0.000  |
|        |       |        |        |        | $\langle 607 R^0, b^0, s_{\text{HB}}^2, s_{\text{free}}^0, t^1, s_X^0 \rangle$ | 0.17%  | 0.001  | 0.000  | 0.000  |
|        |       |        |        |        | $\langle 607 R^0, b^0, s_{\text{HB}}^1, s_{\text{free}}^0, t^0, s_X^0 \rangle$ | 0.00%  | 0.002  | 0.000  | 0.000  |
| 5156.5 | 0.111 | 0.003  | -0.000 | 0.000  | $\langle 609 R^3, b^1, s_{\text{HB}}^0, s_{\text{free}}^0, t^1, s_X^0 \rangle$ | 46.58% | 0.000  | 0.000  | 0.000  |
|        |       |        |        |        | $\langle 609 R^0, b^0, s_{\text{HB}}^2, s_{\text{free}}^0, t^0, s_X^0 \rangle$ | 0.74%  | 0.007  | 0.000  | 0.000  |
|        |       |        |        |        | $\langle 609 R^2, b^0, s_{\text{HB}}^1, s_{\text{free}}^0, t^0, s_X^0 \rangle$ | 0.05%  | -0.001 | 0.000  | 0.000  |
|        |       |        |        |        | $\langle 609 R^0, b^0, s_{\text{HB}}^1, s_{\text{free}}^0, t^0, s_X^0 \rangle$ | 0.01%  | -0.004 | 0.000  | 0.000  |
| 5163.1 | 0.067 | -0.002 | 0.000  | 0.000  | $\langle 612 R^1, b^0, s_{\text{HB}}^0, s_{\text{free}}^1, t^4, s_X^0 \rangle$ | 51.05% | 0.000  | 0.000  | 0.000  |
|        |       |        |        |        | $\langle 612 R^2, b^0, s_{\text{HB}}^1, s_{\text{free}}^0, t^0, s_X^0 \rangle$ | 0.92%  | -0.001 | 0.000  | 0.000  |
|        |       |        |        |        | $\langle 612 R^0, b^0, s_{\text{HB}}^2, s_{\text{free}}^0, t^0, s_X^0 \rangle$ | 0.88%  | -0.008 | 0.000  | 0.000  |
|        |       |        |        |        | $\langle 612 R^0, b^0, s_{\text{HB}}^1, s_{\text{free}}^0, t^0, s_X^0 \rangle$ | 0.02%  | 0.008  | 0.001  | 0.000  |
| 5165.9 | 0.122 | 0.003  | -0.000 | -0.000 | $\langle 613 R^1, b^0, s_{\text{HB}}^0, s_{\text{free}}^1, t^4, s_X^0 \rangle$ | 14.32% | 0.000  | 0.000  | 0.000  |
|        |       |        |        |        | $\langle 613 R^4, b^0, s_{\text{HB}}^0, s_{\text{free}}^0, t^3, s_X^0 \rangle$ | 6.02%  | 0.000  | 0.000  | 0.000  |
|        |       |        |        |        | $\langle 613 R^0, b^0, s_{\text{HB}}^2, s_{\text{free}}^0, t^0, s_X^0 \rangle$ | 1.52%  | 0.010  | 0.001  | -0.001 |
|        |       |        |        |        | $\langle 613 R^0, b^0, s_{\text{HB}}^2, s_{\text{free}}^0, t^1, s_X^0 \rangle$ | 0.67%  | 0.002  | 0.000  | 0.000  |
|        |       |        |        |        | $\langle 613 R^0, b^0, s_{\text{HB}}^1, s_{\text{free}}^0, t^0, s_X^0 \rangle$ | 0.03%  | -0.010 | -0.001 | 0.000  |
| 5184.6 | 1.492 | 0.010  | 0.004  | 0.003  | $\langle 617 R^0, b^1, s_{\text{HB}}^0, s_{\text{free}}^1, t^0, s_X^0 \rangle$ | 68.89% | 0.003  | 0.008  | 0.004  |
|        |       |        |        |        | $\langle 617 R^0, b^1, s_{\text{HB}}^0, s_{\text{free}}^0, t^0, s_X^0 \rangle$ | 0.22%  | 0.003  | -0.004 | -0.003 |
|        |       |        |        |        | $\langle 617 R^0, b^0, s_{\text{HB}}^1, s_{\text{free}}^0, t^0, s_X^0 \rangle$ | 0.02%  | 0.008  | 0.001  | 0.000  |
| 5189.0 | 1.504 | -0.010 | -0.002 | -0.001 | $\langle 618 R^0, b^1, s_{\text{HB}}^0, s_{\text{free}}^1, t^0, s_X^0 \rangle$ | 10.43% | -0.001 | -0.003 | -0.002 |
|        |       |        |        |        | $\langle 618 R^4, b^0, s_{\text{HB}}^0, s_{\text{free}}^0, t^3, s_X^0 \rangle$ | 7.75%  | 0.000  | 0.000  | 0.000  |
|        |       |        |        |        | $\langle 618 R^0, b^0, s_{\text{HB}}^2, s_{\text{free}}^0, t^0, s_X^0 \rangle$ | 2.71%  | -0.013 | -0.001 | 0.001  |
|        |       |        |        |        | $\langle 618 R^2, b^0, s_{\text{HB}}^1, s_{\text{free}}^0, t^0, s_X^0 \rangle$ | 1.04%  | 0.003  | 0.000  | 0.000  |
| 5192.1 | 0.091 | 0.003  | 0.000  | 0.000  | $\langle 620 R^4, b^0, s_{\text{HB}}^0, s_{\text{free}}^0, t^3, s_X^0 \rangle$ | 6.17%  | 0.000  | 0.000  | 0.000  |
|        |       |        |        |        | $\langle 620 R^2, b^0, s_{\text{HB}}^1, s_{\text{free}}^0, t^0, s_X^0 \rangle$ | 1.21%  | -0.003 | 0.000  | 0.000  |
|        |       |        |        |        | $\langle 620 R^0, b^0, s_{\text{HB}}^2, s_{\text{free}}^0, t^0, s_X^0 \rangle$ | 0.42%  | 0.005  | 0.000  | 0.000  |
|        |       |        |        |        | $\langle 620 R^0, b^0, s_{\text{HB}}^1, s_{\text{free}}^0, t^0, s_X^0 \rangle$ | 0.01%  | -0.005 | 0.000  | 0.000  |
| 5194.8 | 0.130 | -0.003 | -0.001 | -0.000 | $\langle 621 R^1, b^0, s_{\text{HB}}^0, s_{\text{free}}^1, t^2, s_X^0 \rangle$ | 38.74% | 0.000  | 0.000  | 0.000  |
|        |       |        |        |        | $\langle 621 R^3, b^1, s_{\text{HB}}^0, s_{\text{free}}^0, t^0, s_X^0 \rangle$ | 17.22% | 0.000  | 0.000  | 0.000  |
|        |       |        |        |        | $\langle 621 R^2, b^0, s_{\text{HB}}^1, s_{\text{free}}^0, t^0, s_X^0 \rangle$ | 0.49%  | -0.002 | 0.000  | 0.000  |
|        |       |        |        |        | $\langle 621 R^0, b^0, s_{\text{HB}}^2, s_{\text{free}}^0, t^0, s_X^0 \rangle$ | 0.24%  | -0.004 | 0.000  | 0.000  |

|        |       |        |        |        |                                                                                |        |        |        |        |
|--------|-------|--------|--------|--------|--------------------------------------------------------------------------------|--------|--------|--------|--------|
|        |       |        |        |        | $\langle 621 R^0, b^0, s_{\text{HB}}^1, s_{\text{free}}^0, t^0, s_X^0 \rangle$ | 0.00%  | 0.003  | 0.000  | 0.000  |
| 5198.5 | 0.115 | -0.003 | -0.000 | -0.000 | $\langle 624 R^5, b^0, s_{\text{HB}}^0, s_{\text{free}}^0, t^1, s_X^0 \rangle$ | 23.24% | 0.000  | 0.000  | 0.000  |
|        |       |        |        |        | $\langle 624 R^1, b^0, s_{\text{HB}}^0, s_{\text{free}}^1, t^2, s_X^0 \rangle$ | 5.87%  | 0.000  | 0.000  | 0.000  |
|        |       |        |        |        | $\langle 624 R^0, b^0, s_{\text{HB}}^2, s_{\text{free}}^0, t^0, s_X^0 \rangle$ | 0.37%  | -0.005 | 0.000  | 0.000  |
|        |       |        |        |        | $\langle 624 R^0, b^0, s_{\text{HB}}^1, s_{\text{free}}^0, t^0, s_X^0 \rangle$ | 0.00%  | 0.003  | 0.000  | 0.000  |
|        |       |        |        |        | $\langle 624 R^0, b^0, s_{\text{HB}}^0, s_{\text{free}}^0, t^0, s_X^1 \rangle$ | 0.00%  | 0.000  | 0.000  | 0.000  |
| 5203.9 | 0.297 | 0.005  | 0.001  | 0.000  | $\langle 626 R^4, b^0, s_{\text{HB}}^0, s_{\text{free}}^0, t^0, s_X^0 \rangle$ | 6.48%  | 0.000  | 0.000  | 0.000  |
|        |       |        |        |        | $\langle 626 R^0, b^0, s_{\text{HB}}^2, s_{\text{free}}^0, t^0, s_X^0 \rangle$ | 1.21%  | 0.009  | 0.001  | -0.001 |
|        |       |        |        |        | $\langle 626 R^0, b^0, s_{\text{HB}}^1, s_{\text{free}}^0, t^0, s_X^0 \rangle$ | 0.01%  | -0.004 | 0.000  | 0.000  |
|        |       |        |        |        | $\langle 626 R^0, b^0, s_{\text{HB}}^0, s_{\text{free}}^0, t^1, s_X^0 \rangle$ | 0.00%  | -0.001 | 0.000  | 0.000  |
| 5205.3 | 0.051 | 0.002  | 0.000  | 0.000  | $\langle 627 R^4, b^0, s_{\text{HB}}^0, s_{\text{free}}^0, t^0, s_X^0 \rangle$ | 55.32% | 0.000  | 0.000  | 0.000  |
|        |       |        |        |        | $\langle 627 R^2, b^0, s_{\text{HB}}^1, s_{\text{free}}^0, t^0, s_X^0 \rangle$ | 0.25%  | 0.001  | 0.000  | 0.000  |
|        |       |        |        |        | $\langle 627 R^0, b^0, s_{\text{HB}}^2, s_{\text{free}}^0, t^0, s_X^0 \rangle$ | 0.19%  | 0.004  | 0.000  | 0.000  |
|        |       |        |        |        | $\langle 627 R^0, b^0, s_{\text{HB}}^1, s_{\text{free}}^0, t^0, s_X^0 \rangle$ | 0.00%  | -0.002 | 0.000  | 0.000  |
| 5211.2 | 0.050 | 0.002  | 0.000  | 0.000  | $\langle 629 R^4, b^0, s_{\text{HB}}^0, s_{\text{free}}^0, t^1, s_X^0 \rangle$ | 16.48% | 0.000  | 0.000  | 0.000  |
|        |       |        |        |        | $\langle 629 R^3, b^0, s_{\text{HB}}^0, s_{\text{free}}^0, t^1, s_X^1 \rangle$ | 5.31%  | 0.000  | 0.000  | 0.000  |
|        |       |        |        |        | $\langle 629 R^2, b^0, s_{\text{HB}}^1, s_{\text{free}}^0, t^0, s_X^0 \rangle$ | 1.47%  | -0.004 | 0.000  | 0.000  |
|        |       |        |        |        | $\langle 629 R^0, b^0, s_{\text{HB}}^2, s_{\text{free}}^0, t^0, s_X^0 \rangle$ | 0.33%  | 0.005  | 0.000  | 0.000  |
| 5229.7 | 0.060 | -0.002 | -0.000 | -0.000 | $\langle 635 R^1, b^1, s_{\text{HB}}^0, s_{\text{free}}^0, t^2, s_X^1 \rangle$ | 18.68% | 0.000  | 0.000  | 0.000  |
|        |       |        |        |        | $\langle 635 R^0, b^0, s_{\text{HB}}^1, s_{\text{free}}^0, t^1, s_X^1 \rangle$ | 10.50% | -0.001 | 0.000  | 0.000  |
|        |       |        |        |        | $\langle 635 R^0, b^0, s_{\text{HB}}^2, s_{\text{free}}^0, t^0, s_X^0 \rangle$ | 0.32%  | -0.005 | 0.000  | 0.000  |
|        |       |        |        |        | $\langle 635 R^0, b^0, s_{\text{HB}}^0, s_{\text{free}}^0, t^0, s_X^1 \rangle$ | 0.02%  | 0.002  | 0.000  | 0.000  |
|        |       |        |        |        | $\langle 635 R^0, b^0, s_{\text{HB}}^1, s_{\text{free}}^0, t^0, s_X^0 \rangle$ | 0.00%  | 0.002  | 0.000  | 0.000  |
| 5259.1 | 0.308 | 0.005  | 0.001  | 0.000  | $\langle 651 R^2, b^0, s_{\text{HB}}^1, s_{\text{free}}^0, t^0, s_X^0 \rangle$ | 19.75% | 0.008  | 0.001  | 0.000  |
|        |       |        |        |        | $\langle 651 R^0, b^0, s_{\text{HB}}^2, s_{\text{free}}^0, t^0, s_X^0 \rangle$ | 0.78%  | 0.007  | 0.000  | 0.000  |
|        |       |        |        |        | $\langle 651 R^0, b^0, s_{\text{HB}}^1, s_{\text{free}}^0, t^0, s_X^0 \rangle$ | 0.02%  | -0.008 | -0.001 | 0.000  |
| 5261.4 | 0.080 | -0.002 | -0.000 | -0.000 | $\langle 652 R^2, b^0, s_{\text{HB}}^1, s_{\text{free}}^0, t^2, s_X^0 \rangle$ | 6.54%  | 0.000  | 0.000  | 0.000  |
|        |       |        |        |        | $\langle 652 R^0, b^0, s_{\text{HB}}^2, s_{\text{free}}^0, t^1, s_X^0 \rangle$ | 0.44%  | 0.001  | 0.000  | 0.000  |
|        |       |        |        |        | $\langle 652 R^0, b^0, s_{\text{HB}}^2, s_{\text{free}}^0, t^0, s_X^0 \rangle$ | 0.09%  | -0.002 | 0.000  | 0.000  |
|        |       |        |        |        | $\langle 652 R^0, b^0, s_{\text{HB}}^1, s_{\text{free}}^0, t^0, s_X^0 \rangle$ | 0.00%  | -0.002 | 0.000  | 0.000  |
| 5268.2 | 0.208 | -0.004 | -0.000 | -0.000 | $\langle 655 R^3, b^1, s_{\text{HB}}^0, s_{\text{free}}^0, t^1, s_X^0 \rangle$ | 5.93%  | 0.000  | 0.000  | 0.000  |
|        |       |        |        |        | $\langle 655 R^1, b^1, s_{\text{HB}}^0, s_{\text{free}}^0, t^2, s_X^1 \rangle$ | 5.61%  | 0.000  | 0.000  | 0.000  |
|        |       |        |        |        | $\langle 655 R^4, b^0, s_{\text{HB}}^0, s_{\text{free}}^0, t^3, s_X^0 \rangle$ | 5.14%  | 0.000  | 0.000  | 0.000  |
|        |       |        |        |        | $\langle 655 R^0, b^0, s_{\text{HB}}^2, s_{\text{free}}^0, t^0, s_X^0 \rangle$ | 0.74%  | -0.007 | 0.000  | 0.000  |
|        |       |        |        |        | $\langle 655 R^2, b^0, s_{\text{HB}}^1, s_{\text{free}}^0, t^0, s_X^0 \rangle$ | 0.26%  | 0.001  | 0.000  | 0.000  |
|        |       |        |        |        | $\langle 655 R^0, b^0, s_{\text{HB}}^1, s_{\text{free}}^0, t^0, s_X^0 \rangle$ | 0.00%  | 0.001  | 0.000  | 0.000  |
| 5268.7 | 0.092 | 0.003  | 0.000  | 0.000  | $\langle 656 R^4, b^0, s_{\text{HB}}^0, s_{\text{free}}^0, t^1, s_X^0 \rangle$ | 52.72% | 0.000  | 0.000  | 0.000  |
|        |       |        |        |        | $\langle 656 R^0, b^0, s_{\text{HB}}^2, s_{\text{free}}^0, t^0, s_X^0 \rangle$ | 0.38%  | 0.005  | 0.000  | 0.000  |
|        |       |        |        |        | $\langle 656 R^2, b^0, s_{\text{HB}}^1, s_{\text{free}}^0, t^0, s_X^0 \rangle$ | 0.18%  | 0.001  | 0.000  | 0.000  |
|        |       |        |        |        | $\langle 656 R^0, b^0, s_{\text{HB}}^1, s_{\text{free}}^0, t^0, s_X^0 \rangle$ | 0.00%  | -0.002 | 0.000  | 0.000  |
| 5269.6 | 0.065 | -0.002 | -0.000 | -0.000 | $\langle 657 R^2, b^0, s_{\text{HB}}^0, s_{\text{free}}^0, t^3, s_X^1 \rangle$ | 26.43% | 0.000  | 0.000  | 0.000  |
|        |       |        |        |        | $\langle 657 R^3, b^1, s_{\text{HB}}^0, s_{\text{free}}^0, t^2, s_X^0 \rangle$ | 5.39%  | 0.000  | 0.000  | 0.000  |

|        |       |        |        |        |                                                                                |        |        |        |        |
|--------|-------|--------|--------|--------|--------------------------------------------------------------------------------|--------|--------|--------|--------|
|        |       |        |        |        | $\langle 657 R^2, b^0, s_{\text{HB}}^1, s_{\text{free}}^0, t^0, s_X^0 \rangle$ | 0.41%  | 0.002  | 0.000  | 0.000  |
|        |       |        |        |        | $\langle 657 R^0, b^0, s_{\text{HB}}^2, s_{\text{free}}^0, t^0, s_X^0 \rangle$ | 0.15%  | -0.003 | 0.000  | 0.000  |
|        |       |        |        |        | $\langle 657 R^0, b^0, s_{\text{HB}}^1, s_{\text{free}}^0, t^0, s_X^0 \rangle$ | 0.00%  | -0.004 | 0.000  | 0.000  |
| 5274.4 | 0.142 | 0.003  | 0.000  | 0.000  | $\langle 659 R^4, b^0, s_{\text{HB}}^0, s_{\text{free}}^0, t^3, s_X^0 \rangle$ | 16.51% | 0.000  | 0.000  | 0.000  |
|        |       |        |        |        | $\langle 659 R^3, b^1, s_{\text{HB}}^0, s_{\text{free}}^0, t^1, s_X^0 \rangle$ | 13.15% | 0.000  | 0.000  | 0.000  |
|        |       |        |        |        | $\langle 659 R^2, b^0, s_{\text{HB}}^0, s_{\text{free}}^0, t^3, s_X^1 \rangle$ | 7.16%  | 0.000  | 0.000  | 0.000  |
|        |       |        |        |        | $\langle 659 R^0, b^0, s_{\text{HB}}^2, s_{\text{free}}^0, t^0, s_X^0 \rangle$ | 0.90%  | 0.008  | 0.000  | 0.000  |
|        |       |        |        |        | $\langle 659 R^0, b^0, s_{\text{HB}}^2, s_{\text{free}}^0, t^1, s_X^0 \rangle$ | 0.28%  | 0.001  | 0.000  | 0.000  |
|        |       |        |        |        | $\langle 659 R^0, b^0, s_{\text{HB}}^1, s_{\text{free}}^0, t^0, s_X^0 \rangle$ | 0.01%  | -0.004 | 0.000  | 0.000  |
| 5279.9 | 0.540 | 0.006  | 0.001  | 0.000  | $\langle 660 R^3, b^1, s_{\text{HB}}^0, s_{\text{free}}^0, t^1, s_X^0 \rangle$ | 5.11%  | 0.000  | 0.000  | 0.000  |
|        |       |        |        |        | $\langle 660 R^0, b^0, s_{\text{HB}}^2, s_{\text{free}}^0, t^0, s_X^0 \rangle$ | 3.13%  | 0.014  | 0.001  | -0.001 |
|        |       |        |        |        | $\langle 660 R^0, b^0, s_{\text{HB}}^2, s_{\text{free}}^0, t^1, s_X^0 \rangle$ | 0.62%  | 0.001  | 0.000  | 0.000  |
|        |       |        |        |        | $\langle 660 R^0, b^0, s_{\text{HB}}^1, s_{\text{free}}^0, t^0, s_X^0 \rangle$ | 0.02%  | -0.007 | -0.001 | 0.000  |
| 5283.3 | 0.298 | -0.005 | -0.001 | -0.000 | $\langle 661 R^4, b^0, s_{\text{HB}}^0, s_{\text{free}}^0, t^3, s_X^0 \rangle$ | 24.57% | 0.000  | 0.000  | 0.000  |
|        |       |        |        |        | $\langle 661 R^0, b^0, s_{\text{HB}}^2, s_{\text{free}}^0, t^0, s_X^0 \rangle$ | 1.60%  | -0.010 | -0.001 | 0.001  |
|        |       |        |        |        | $\langle 661 R^2, b^0, s_{\text{HB}}^1, s_{\text{free}}^0, t^0, s_X^0 \rangle$ | 0.31%  | -0.002 | 0.000  | 0.000  |
|        |       |        |        |        | $\langle 661 R^0, b^0, s_{\text{HB}}^1, s_{\text{free}}^0, t^0, s_X^0 \rangle$ | 0.02%  | 0.007  | 0.001  | 0.000  |
| 5292.8 | 0.056 | -0.002 | -0.000 | -0.000 | $\langle 664 R^4, b^0, s_{\text{HB}}^0, s_{\text{free}}^0, t^3, s_X^0 \rangle$ | 5.94%  | 0.000  | 0.000  | 0.000  |
|        |       |        |        |        | $\langle 664 R^0, b^0, s_{\text{HB}}^2, s_{\text{free}}^0, t^0, s_X^0 \rangle$ | 0.31%  | -0.004 | 0.000  | 0.000  |
|        |       |        |        |        | $\langle 664 R^2, b^0, s_{\text{HB}}^1, s_{\text{free}}^0, t^0, s_X^0 \rangle$ | 0.11%  | 0.001  | 0.000  | 0.000  |
|        |       |        |        |        | $\langle 664 R^0, b^0, s_{\text{HB}}^1, s_{\text{free}}^0, t^0, s_X^0 \rangle$ | 0.00%  | 0.004  | 0.000  | 0.000  |
| 5301.1 | 0.051 | -0.002 | 0.000  | 0.000  | $\langle 669 R^4, b^0, s_{\text{HB}}^0, s_{\text{free}}^0, t^2, s_X^0 \rangle$ | 7.46%  | 0.000  | 0.000  | 0.000  |
|        |       |        |        |        | $\langle 669 R^1, b^1, s_{\text{HB}}^1, s_{\text{free}}^0, t^0, s_X^0 \rangle$ | 4.62%  | 0.001  | 0.000  | -0.001 |
|        |       |        |        |        | $\langle 669 R^0, b^0, s_{\text{HB}}^2, s_{\text{free}}^0, t^0, s_X^0 \rangle$ | 0.03%  | -0.002 | 0.000  | 0.000  |
|        |       |        |        |        | $\langle 669 R^0, b^0, s_{\text{HB}}^0, s_{\text{free}}^1, t^0, s_X^0 \rangle$ | 0.01%  | -0.001 | -0.001 | -0.001 |
| 5312.5 | 0.118 | 0.003  | 0.000  | 0.000  | $\langle 673 R^2, b^2, s_{\text{HB}}^0, s_{\text{free}}^0, t^1, s_X^0 \rangle$ | 18.12% | 0.000  | 0.000  | 0.000  |
|        |       |        |        |        | $\langle 673 R^0, b^0, s_{\text{HB}}^2, s_{\text{free}}^0, t^0, s_X^0 \rangle$ | 0.54%  | 0.006  | 0.000  | 0.000  |
|        |       |        |        |        | $\langle 673 R^2, b^0, s_{\text{HB}}^1, s_{\text{free}}^0, t^0, s_X^0 \rangle$ | 0.38%  | -0.001 | 0.000  | 0.000  |
|        |       |        |        |        | $\langle 673 R^0, b^0, s_{\text{HB}}^1, s_{\text{free}}^0, t^0, s_X^0 \rangle$ | 0.00%  | -0.002 | 0.000  | 0.000  |
| 5314.8 | 0.102 | -0.003 | -0.000 | -0.000 | $\langle 674 R^2, b^2, s_{\text{HB}}^0, s_{\text{free}}^0, t^1, s_X^0 \rangle$ | 9.42%  | 0.000  | 0.000  | 0.000  |
|        |       |        |        |        | $\langle 674 R^4, b^0, s_{\text{HB}}^0, s_{\text{free}}^0, t^3, s_X^0 \rangle$ | 5.80%  | 0.000  | 0.000  | 0.000  |
|        |       |        |        |        | $\langle 674 R^0, b^0, s_{\text{HB}}^2, s_{\text{free}}^0, t^0, s_X^0 \rangle$ | 0.64%  | -0.007 | 0.000  | 0.000  |
|        |       |        |        |        | $\langle 674 R^0, b^0, s_{\text{HB}}^2, s_{\text{free}}^0, t^1, s_X^0 \rangle$ | 0.20%  | -0.001 | 0.000  | 0.000  |
|        |       |        |        |        | $\langle 674 R^0, b^0, s_{\text{HB}}^1, s_{\text{free}}^0, t^0, s_X^0 \rangle$ | 0.00%  | 0.004  | 0.000  | 0.000  |
| 5331.3 | 0.113 | 0.003  | 0.000  | 0.000  | $\langle 681 R^2, b^0, s_{\text{HB}}^0, s_{\text{free}}^1, t^0, s_X^0 \rangle$ | 17.63% | -0.002 | -0.002 | -0.003 |
|        |       |        |        |        | $\langle 681 R^0, b^1, s_{\text{HB}}^0, s_{\text{free}}^1, t^1, s_X^0 \rangle$ | 12.51% | 0.000  | 0.001  | 0.000  |
|        |       |        |        |        | $\langle 681 R^4, b^0, s_{\text{HB}}^0, s_{\text{free}}^0, t^3, s_X^0 \rangle$ | 5.90%  | 0.000  | 0.000  | 0.000  |
|        |       |        |        |        | $\langle 681 R^0, b^0, s_{\text{HB}}^0, s_{\text{free}}^1, t^0, s_X^0 \rangle$ | 0.21%  | 0.003  | 0.007  | 0.004  |
|        |       |        |        |        | $\langle 681 R^0, b^0, s_{\text{HB}}^1, s_{\text{free}}^0, t^0, s_X^0 \rangle$ | 0.00%  | -0.003 | 0.000  | 0.000  |
| 5334.3 | 0.188 | 0.004  | 0.000  | 0.001  | $\langle 682 R^2, b^0, s_{\text{HB}}^0, s_{\text{free}}^1, t^0, s_X^0 \rangle$ | 21.09% | -0.002 | -0.002 | -0.004 |
|        |       |        |        |        | $\langle 682 R^0, b^1, s_{\text{HB}}^0, s_{\text{free}}^1, t^1, s_X^0 \rangle$ | 15.29% | 0.001  | 0.001  | 0.000  |
|        |       |        |        |        | $\langle 682 R^4, b^0, s_{\text{HB}}^0, s_{\text{free}}^0, t^3, s_X^0 \rangle$ | 6.03%  | 0.000  | 0.000  | 0.000  |

|        |       |        |        |        |                                                                                 |        |        |        |        |
|--------|-------|--------|--------|--------|---------------------------------------------------------------------------------|--------|--------|--------|--------|
|        |       |        |        |        | $\langle 682 R^0, b^0, s_{\text{HB}}^0, s_{\text{free}}^1, t^0, s_X^0 \rangle$  | 0.23%  | 0.003  | 0.007  | 0.004  |
|        |       |        |        |        | $\langle 682 R^0, b^0, s_{\text{HB}}^1, s_{\text{free}}^0, t^0, s_X^0 \rangle$  | 0.01%  | -0.005 | 0.000  | 0.000  |
| 5345.1 | 0.052 | 0.002  | 0.000  | 0.000  | $\langle 684 R^0, b^1, s_{\text{HB}}^0, s_{\text{free}}^1, t^1, s_X^0 \rangle$  | 51.31% | -0.001 | -0.001 | -0.001 |
|        |       |        |        |        | $\langle 684 R^2, b^0, s_{\text{HB}}^0, s_{\text{free}}^1, t^0, s_X^0 \rangle$  | 19.78% | -0.002 | -0.002 | -0.004 |
|        |       |        |        |        | $\langle 684 R^0, b^0, s_{\text{HB}}^0, s_{\text{free}}^1, t^0, s_X^0 \rangle$  | 0.28%  | 0.004  | 0.008  | 0.005  |
|        |       |        |        |        | $\langle 684 R^0, b^0, s_{\text{HB}}^1, s_{\text{free}}^0, t^0, s_X^0 \rangle$  | 0.00%  | -0.002 | 0.000  | 0.000  |
| 5365.0 | 0.081 | 0.002  | 0.000  | 0.000  | $\langle 695 R^5, b^0, s_{\text{HB}}^0, s_{\text{free}}^0, t^0, s_X^0 \rangle$  | 4.39%  | 0.000  | 0.000  | 0.000  |
|        |       |        |        |        | $\langle 695 R^0, b^0, s_{\text{HB}}^2, s_{\text{free}}^0, t^0, s_X^0 \rangle$  | 0.72%  | 0.007  | 0.000  | 0.000  |
|        |       |        |        |        | $\langle 695 R^0, b^0, s_{\text{HB}}^2, s_{\text{free}}^0, t^1, s_X^0 \rangle$  | 0.62%  | 0.001  | 0.000  | 0.000  |
|        |       |        |        |        | $\langle 695 R^0, b^0, s_{\text{HB}}^1, s_{\text{free}}^0, t^0, s_X^0 \rangle$  | 0.01%  | -0.006 | -0.001 | 0.000  |
| 5365.7 | 0.158 | -0.003 | -0.000 | -0.000 | $\langle 696 R^3, b^1, s_{\text{HB}}^0, s_{\text{free}}^0, t^2, s_X^0 \rangle$  | 9.52%  | 0.000  | 0.000  | 0.000  |
|        |       |        |        |        | $\langle 696 R^0, b^0, s_{\text{HB}}^2, s_{\text{free}}^0, t^0, s_X^0 \rangle$  | 1.38%  | -0.010 | -0.001 | 0.001  |
|        |       |        |        |        | $\langle 696 R^0, b^0, s_{\text{HB}}^2, s_{\text{free}}^0, t^1, s_X^0 \rangle$  | 1.23%  | -0.002 | 0.000  | 0.000  |
|        |       |        |        |        | $\langle 696 R^0, b^0, s_{\text{HB}}^1, s_{\text{free}}^0, t^0, s_X^0 \rangle$  | 0.01%  | 0.006  | 0.001  | 0.000  |
| 5385.4 | 0.102 | -0.003 | -0.000 | -0.000 | $\langle 706 R^3, b^1, s_{\text{HB}}^0, s_{\text{free}}^0, t^3, s_X^0 \rangle$  | 5.19%  | 0.000  | 0.000  | 0.000  |
|        |       |        |        |        | $\langle 706 R^0, b^0, s_{\text{HB}}^2, s_{\text{free}}^0, t^1, s_X^0 \rangle$  | 1.77%  | -0.003 | 0.000  | 0.000  |
|        |       |        |        |        | $\langle 706 R^0, b^0, s_{\text{HB}}^2, s_{\text{free}}^0, t^0, s_X^0 \rangle$  | 1.07%  | -0.008 | -0.001 | 0.000  |
|        |       |        |        |        | $\langle 706 R^0, b^0, s_{\text{HB}}^1, s_{\text{free}}^0, t^0, s_X^0 \rangle$  | 0.02%  | 0.007  | 0.001  | 0.000  |
| 5474.8 | 0.060 | -0.002 | -0.000 | -0.000 | $\langle 743 R^4, b^1, s_{\text{HB}}^0, s_{\text{free}}^0, t^0, s_X^0 \rangle$  | 15.07% | 0.000  | 0.000  | 0.000  |
|        |       |        |        |        | $\langle 743 R^2, b^2, s_{\text{HB}}^0, s_{\text{free}}^0, t^0, s_X^0 \rangle$  | 6.74%  | 0.000  | 0.000  | 0.000  |
|        |       |        |        |        | $\langle 743 R^3, b^0, s_{\text{HB}}^1, s_{\text{free}}^0, t^0, s_X^0 \rangle$  | 1.36%  | 0.000  | -0.001 | 0.002  |
|        |       |        |        |        | $\langle 743 R^0, b^0, s_{\text{HB}}^2, s_{\text{free}}^0, t^0, s_X^0 \rangle$  | 0.09%  | -0.002 | 0.000  | 0.000  |
|        |       |        |        |        | $\langle 743 R^0, b^0, s_{\text{HB}}^1, s_{\text{free}}^0, t^0, s_X^0 \rangle$  | 0.00%  | 0.004  | 0.000  | 0.000  |
| 5478.0 | 0.070 | -0.002 | 0.000  | -0.000 | $\langle 744 R^2, b^0, s_{\text{HB}}^0, s_{\text{free}}^1, t^0, s_X^0 \rangle$  | 19.08% | 0.001  | 0.001  | 0.001  |
|        |       |        |        |        | $\langle 744 R^0, b^0, s_{\text{HB}}^2, s_{\text{free}}^0, t^0, s_X^0 \rangle$  | 0.42%  | -0.005 | 0.000  | 0.000  |
|        |       |        |        |        | $\langle 744 R^1, b^0, s_{\text{HB}}^0, s_{\text{free}}^0, t^0, s_X^0 \rangle$  | 0.00%  | -0.001 | 0.001  | -0.001 |
|        |       |        |        |        | $\langle 744 R^0, b^0, s_{\text{HB}}^1, s_{\text{free}}^0, t^0, s_X^0 \rangle$  | 0.00%  | 0.002  | 0.000  | 0.000  |
| 5505.9 | 0.256 | 0.004  | 0.000  | 0.000  | $\langle 759 R^2, b^0, s_{\text{HB}}^1, s_{\text{free}}^0, t^4, s_X^0 \rangle$  | 4.09%  | 0.000  | 0.000  | 0.000  |
|        |       |        |        |        | $\langle 759 R^0, b^0, s_{\text{HB}}^2, s_{\text{free}}^0, t^1, s_X^0 \rangle$  | 3.37%  | 0.003  | 0.000  | 0.000  |
|        |       |        |        |        | $\langle 759 R^0, b^0, s_{\text{HB}}^2, s_{\text{free}}^0, t^0, s_X^0 \rangle$  | 2.01%  | 0.012  | 0.001  | -0.001 |
|        |       |        |        |        | $\langle 759 R^0, b^0, s_{\text{HB}}^1, s_{\text{free}}^0, t^0, s_X^0 \rangle$  | 0.04%  | -0.011 | -0.001 | 0.000  |
| 5747.7 | 0.085 | 0.002  | 0.000  | 0.000  | $\langle 875 R^0, b^2, s_{\text{HB}}^1, s_{\text{free}}^0, t^0, s_X^0 \rangle$  | 15.45% | -0.004 | 0.000  | 0.000  |
|        |       |        |        |        | $\langle 875 R^0, b^0, s_{\text{HB}}^2, s_{\text{free}}^0, t^0, s_X^0 \rangle$  | 0.15%  | 0.003  | 0.000  | 0.000  |
|        |       |        |        |        | $\langle 875 R^0, b^0, s_{\text{HB}}^1, s_{\text{free}}^0, t^0, s_X^0 \rangle$  | 0.01%  | 0.004  | 0.000  | 0.000  |
| 6983.5 | 0.075 | 0.001  | 0.002  | 0.001  | $\langle 1712 R^3, b^0, s_{\text{HB}}^0, s_{\text{free}}^1, t^0, s_X^0 \rangle$ | 34.04% | 0.000  | 0.000  | 0.000  |
|        |       |        |        |        | $\langle 1712 R^0, b^0, s_{\text{HB}}^0, s_{\text{free}}^2, t^0, s_X^0 \rangle$ | 2.46%  | 0.002  | 0.003  | 0.002  |
|        |       |        |        |        | $\langle 1712 R^0, b^0, s_{\text{HB}}^0, s_{\text{free}}^1, t^0, s_X^0 \rangle$ | 0.01%  | -0.001 | -0.001 | -0.001 |
|        |       |        |        |        | $\langle 1712 R^0, b^0, s_{\text{HB}}^1, s_{\text{free}}^0, t^0, s_X^0 \rangle$ | 0.00%  | -0.001 | 0.000  | 0.000  |
| 6999.3 | 0.110 | 0.000  | 0.002  | 0.001  | $\langle 1726 R^2, b^1, s_{\text{HB}}^0, s_{\text{free}}^1, t^0, s_X^0 \rangle$ | 12.65% | -0.001 | 0.002  | 0.000  |
|        |       |        |        |        | $\langle 1726 R^3, b^0, s_{\text{HB}}^0, s_{\text{free}}^1, t^0, s_X^0 \rangle$ | 6.29%  | 0.000  | 0.000  | 0.000  |
|        |       |        |        |        | $\langle 1726 R^0, b^0, s_{\text{HB}}^0, s_{\text{free}}^2, t^0, s_X^0 \rangle$ | 2.85%  | 0.002  | 0.004  | 0.002  |

---

MeOH<sub>2</sub> ··· Ar<sub>2</sub>


---

| $\omega$ | $I$   | $\mu_x$ | $\mu_y$ | $\mu_z$ | Assignment                                                                 | $ c_n ^2$ | $\mu_x^{g \rightarrow n}$ | $\mu_y^{g \rightarrow n}$ | $\mu_z^{g \rightarrow n}$ |
|----------|-------|---------|---------|---------|----------------------------------------------------------------------------|-----------|---------------------------|---------------------------|---------------------------|
| 4049.5   | 0.087 | -0.003  | 0.001   | 0.000   | $\langle 911   R^2, b^1, s_{\text{sym}}^0, s_{\text{asym}}^0, t^3 \rangle$ | 65.99%    | 0.000                     | 0.000                     | 0.000                     |
|          |       |         |         |         | $\langle 911   R^1, b^0, s_{\text{sym}}^1, s_{\text{asym}}^0, t^0 \rangle$ | 4.36%     | 0.004                     | 0.003                     | 0.000                     |
|          |       |         |         |         | $\langle 911   R^1, b^0, s_{\text{sym}}^0, s_{\text{asym}}^0, t^0 \rangle$ | 0.03%     | -0.005                    | -0.001                    | 0.000                     |
|          |       |         |         |         | $\langle 911   R^0, b^0, s_{\text{sym}}^1, s_{\text{asym}}^0, t^0 \rangle$ | 0.02%     | 0.001                     | -0.003                    | 0.000                     |
| 4049.6   | 0.543 | -0.007  | 0.003   | -0.000  | $\langle 912   R^1, b^0, s_{\text{sym}}^1, s_{\text{asym}}^0, t^0 \rangle$ | 27.13%    | 0.011                     | 0.008                     | 0.000                     |
|          |       |         |         |         | $\langle 912   R^1, b^2, s_{\text{sym}}^0, s_{\text{asym}}^0, t^0 \rangle$ | 16.93%    | 0.003                     | 0.002                     | 0.000                     |
|          |       |         |         |         | $\langle 912   R^3, b^1, s_{\text{sym}}^0, s_{\text{asym}}^0, t^0 \rangle$ | 13.37%    | -0.006                    | -0.002                    | 0.000                     |
|          |       |         |         |         | $\langle 912   R^1, b^0, s_{\text{sym}}^0, s_{\text{asym}}^0, t^0 \rangle$ | 0.19%     | -0.013                    | -0.003                    | 0.000                     |
|          |       |         |         |         | $\langle 912   R^0, b^0, s_{\text{sym}}^1, s_{\text{asym}}^0, t^0 \rangle$ | 0.11%     | 0.002                     | -0.008                    | 0.000                     |
| 4068.6   | 0.596 | -0.000  | -0.000  | -0.008  | $\langle 923   R^4, b^0, s_{\text{sym}}^0, s_{\text{asym}}^0, t^0 \rangle$ | 59.05%    | 0.000                     | 0.000                     | 0.000                     |
|          |       |         |         |         | $\langle 923   R^1, b^0, s_{\text{sym}}^0, s_{\text{asym}}^1, t^0 \rangle$ | 20.30%    | 0.000                     | 0.000                     | -0.010                    |
|          |       |         |         |         | $\langle 923   R^2, b^0, s_{\text{sym}}^0, s_{\text{asym}}^1, t^0 \rangle$ | 0.60%     | 0.000                     | 0.000                     | -0.002                    |
|          |       |         |         |         | $\langle 923   R^0, b^0, s_{\text{sym}}^0, s_{\text{asym}}^1, t^0 \rangle$ | 0.02%     | 0.000                     | 0.000                     | 0.005                     |
| 4082.9   | 1.624 | 0.000   | -0.000  | -0.013  | $\langle 930   R^1, b^0, s_{\text{sym}}^0, s_{\text{asym}}^1, t^0 \rangle$ | 55.74%    | 0.000                     | 0.000                     | -0.017                    |
|          |       |         |         |         | $\langle 930   R^4, b^0, s_{\text{sym}}^0, s_{\text{asym}}^0, t^0 \rangle$ | 14.63%    | 0.000                     | 0.000                     | 0.000                     |
|          |       |         |         |         | $\langle 930   R^0, b^0, s_{\text{sym}}^1, s_{\text{asym}}^1, t^0 \rangle$ | 0.24%     | 0.000                     | 0.000                     | 0.003                     |
|          |       |         |         |         | $\langle 930   R^0, b^0, s_{\text{sym}}^0, s_{\text{asym}}^1, t^0 \rangle$ | 0.04%     | 0.000                     | 0.000                     | 0.008                     |
| 4126.8   | 1.146 | -0.009  | 0.006   | 0.000   | $\langle 961   R^1, b^0, s_{\text{sym}}^1, s_{\text{asym}}^0, t^0 \rangle$ | 38.78%    | 0.013                     | 0.010                     | 0.000                     |
|          |       |         |         |         | $\langle 961   R^1, b^2, s_{\text{sym}}^0, s_{\text{asym}}^0, t^0 \rangle$ | 22.26%    | -0.003                    | -0.002                    | 0.000                     |
|          |       |         |         |         | $\langle 961   R^1, b^0, s_{\text{sym}}^0, s_{\text{asym}}^1, t^1 \rangle$ | 6.49%     | 0.000                     | 0.000                     | 0.000                     |
|          |       |         |         |         | $\langle 961   R^3, b^1, s_{\text{sym}}^0, s_{\text{asym}}^0, t^0 \rangle$ | 5.34%     | 0.004                     | 0.001                     | 0.000                     |
|          |       |         |         |         | $\langle 961   R^3, b^0, s_{\text{sym}}^0, s_{\text{asym}}^0, t^0 \rangle$ | 5.15%     | -0.010                    | -0.003                    | 0.000                     |
|          |       |         |         |         | $\langle 961   R^1, b^0, s_{\text{sym}}^0, s_{\text{asym}}^0, t^0 \rangle$ | 0.13%     | -0.011                    | -0.003                    | 0.000                     |
| 4180.4   | 0.111 | -0.003  | 0.001   | 0.000   | $\langle 994   R^1, b^0, s_{\text{sym}}^0, s_{\text{asym}}^1, t^1 \rangle$ | 52.64%    | 0.001                     | 0.000                     | 0.000                     |
|          |       |         |         |         | $\langle 994   R^1, b^2, s_{\text{sym}}^0, s_{\text{asym}}^0, t^2 \rangle$ | 13.20%    | 0.000                     | 0.000                     | 0.000                     |
|          |       |         |         |         | $\langle 994   R^1, b^0, s_{\text{sym}}^1, s_{\text{asym}}^0, t^0 \rangle$ | 3.64%     | 0.004                     | 0.003                     | 0.000                     |
|          |       |         |         |         | $\langle 994   R^3, b^0, s_{\text{sym}}^0, s_{\text{asym}}^0, t^0 \rangle$ | 0.32%     | -0.003                    | -0.001                    | 0.000                     |
|          |       |         |         |         | $\langle 994   R^1, b^0, s_{\text{sym}}^0, s_{\text{asym}}^0, t^0 \rangle$ | 0.04%     | -0.006                    | -0.001                    | 0.000                     |

---

|        |       |        |        |        |                                                                             |        |        |        |        |
|--------|-------|--------|--------|--------|-----------------------------------------------------------------------------|--------|--------|--------|--------|
| 4201.7 | 0.138 | 0.000  | 0.000  | 0.004  | $\langle 1006   R^1, b^2, s_{\text{sym}}^0, s_{\text{asym}}^0, t^0 \rangle$ | 31.90% | 0.000  | 0.000  | -0.001 |
|        |       |        |        |        | $\langle 1006   R^1, b^2, s_{\text{sym}}^0, s_{\text{asym}}^0, t^1 \rangle$ | 9.55%  | 0.000  | 0.000  | 0.000  |
|        |       |        |        |        | $\langle 1006   R^1, b^0, s_{\text{sym}}^1, s_{\text{asym}}^0, t^0 \rangle$ | 5.26%  | 0.000  | 0.000  | -0.001 |
|        |       |        |        |        | $\langle 1006   R^5, b^0, s_{\text{sym}}^0, s_{\text{asym}}^0, t^0 \rangle$ | 5.03%  | 0.000  | 0.000  | 0.000  |
|        |       |        |        |        | $\langle 1006   R^0, b^1, s_{\text{sym}}^0, s_{\text{asym}}^1, t^0 \rangle$ | 1.53%  | 0.000  | 0.000  | 0.003  |
|        |       |        |        |        | $\langle 1006   R^2, b^0, s_{\text{sym}}^0, s_{\text{asym}}^1, t^0 \rangle$ | 0.40%  | 0.000  | 0.000  | -0.002 |
|        |       |        |        |        | $\langle 1006   R^0, b^0, s_{\text{sym}}^0, s_{\text{asym}}^1, t^0 \rangle$ | 0.00%  | 0.000  | 0.000  | 0.002  |
| 4335.3 | 1.056 | 0.008  | -0.005 | 0.000  | $\langle 1076   R^1, b^0, s_{\text{sym}}^0, s_{\text{asym}}^1, t^0 \rangle$ | 67.15% | -0.004 | -0.003 | 0.000  |
|        |       |        |        |        | $\langle 1076   R^1, b^0, s_{\text{sym}}^1, s_{\text{asym}}^0, t^1 \rangle$ | 6.02%  | 0.000  | 0.000  | 0.000  |
|        |       |        |        |        | $\langle 1076   R^1, b^0, s_{\text{sym}}^0, s_{\text{asym}}^0, t^0 \rangle$ | 0.07%  | 0.008  | 0.002  | 0.000  |
| 4360.3 | 0.128 | 0.003  | -0.002 | 0.000  | $\langle 1093   R^3, b^1, s_{\text{sym}}^0, s_{\text{asym}}^0, t^1 \rangle$ | 24.97% | 0.000  | 0.000  | 0.000  |
|        |       |        |        |        | $\langle 1093   R^1, b^2, s_{\text{sym}}^0, s_{\text{asym}}^0, t^1 \rangle$ | 9.85%  | 0.000  | 0.000  | 0.000  |
|        |       |        |        |        | $\langle 1093   R^1, b^0, s_{\text{sym}}^1, s_{\text{asym}}^0, t^1 \rangle$ | 9.18%  | 0.000  | 0.000  | 0.000  |
|        |       |        |        |        | $\langle 1093   R^4, b^0, s_{\text{sym}}^0, s_{\text{asym}}^0, t^2 \rangle$ | 5.36%  | 0.000  | 0.000  | 0.000  |
|        |       |        |        |        | $\langle 1093   R^1, b^0, s_{\text{sym}}^0, s_{\text{asym}}^1, t^0 \rangle$ | 5.11%  | -0.001 | -0.002 | 0.000  |
|        |       |        |        |        | $\langle 1093   R^1, b^0, s_{\text{sym}}^0, s_{\text{asym}}^0, t^0 \rangle$ | 0.01%  | 0.002  | 0.001  | 0.000  |
|        |       |        |        |        | $\langle 1093   R^0, b^1, s_{\text{sym}}^0, s_{\text{asym}}^0, t^0 \rangle$ | 0.01%  | 0.000  | -0.001 | 0.000  |
| 4428.5 | 0.062 | 0.002  | -0.001 | 0.000  | $\langle 1133   R^1, b^0, s_{\text{sym}}^0, s_{\text{asym}}^1, t^1 \rangle$ | 63.56% | 0.000  | -0.001 | 0.000  |
|        |       |        |        |        | $\langle 1133   R^1, b^0, s_{\text{sym}}^1, s_{\text{asym}}^0, t^1 \rangle$ | 6.30%  | 0.000  | 0.000  | 0.000  |
|        |       |        |        |        | $\langle 1133   R^1, b^0, s_{\text{sym}}^0, s_{\text{asym}}^1, t^0 \rangle$ | 2.24%  | 0.000  | -0.001 | 0.000  |
|        |       |        |        |        | $\langle 1133   R^1, b^0, s_{\text{sym}}^0, s_{\text{asym}}^0, t^0 \rangle$ | 0.00%  | 0.002  | 0.000  | 0.000  |
| 4552.0 | 0.068 | 0.001  | -0.002 | 0.000  | $\langle 1214   R^1, b^0, s_{\text{sym}}^1, s_{\text{asym}}^0, t^0 \rangle$ | 67.16% | -0.001 | -0.003 | 0.000  |
|        |       |        |        |        | $\langle 1214   R^1, b^2, s_{\text{sym}}^0, s_{\text{asym}}^0, t^0 \rangle$ | 9.71%  | 0.000  | 0.000  | 0.000  |
|        |       |        |        |        | $\langle 1214   R^1, b^0, s_{\text{sym}}^0, s_{\text{asym}}^0, t^0 \rangle$ | 0.01%  | 0.003  | 0.001  | 0.000  |
|        |       |        |        |        | $\langle 1214   R^0, b^0, s_{\text{sym}}^1, s_{\text{asym}}^0, t^0 \rangle$ | 0.01%  | -0.001 | 0.003  | 0.000  |
| 4554.2 | 0.211 | 0.000  | -0.000 | -0.004 | $\langle 1215   R^1, b^0, s_{\text{sym}}^0, s_{\text{asym}}^1, t^0 \rangle$ | 70.09% | 0.000  | 0.000  | -0.001 |
|        |       |        |        |        | $\langle 1215   R^1, b^0, s_{\text{sym}}^1, s_{\text{asym}}^0, t^1 \rangle$ | 7.17%  | 0.000  | 0.000  | 0.000  |
|        |       |        |        |        | $\langle 1215   R^2, b^0, s_{\text{sym}}^0, s_{\text{asym}}^1, t^0 \rangle$ | 1.35%  | 0.000  | 0.000  | -0.003 |
|        |       |        |        |        | $\langle 1215   R^0, b^1, s_{\text{sym}}^0, s_{\text{asym}}^1, t^0 \rangle$ | 1.26%  | 0.000  | 0.000  | -0.003 |
|        |       |        |        |        | $\langle 1215   R^0, b^0, s_{\text{sym}}^0, s_{\text{asym}}^1, t^0 \rangle$ | 0.02%  | 0.000  | 0.000  | 0.005  |
| 4669.2 | 0.756 | 0.006  | -0.005 | 0.000  | $\langle 1296   R^1, b^0, s_{\text{sym}}^0, s_{\text{asym}}^1, t^0 \rangle$ | 63.37% | 0.001  | -0.006 | 0.000  |
|        |       |        |        |        | $\langle 1296   R^1, b^0, s_{\text{sym}}^1, s_{\text{asym}}^0, t^1 \rangle$ | 6.38%  | 0.000  | 0.000  | 0.000  |
|        |       |        |        |        | $\langle 1296   R^1, b^0, s_{\text{sym}}^0, s_{\text{asym}}^0, t^0 \rangle$ | 0.03%  | 0.006  | 0.001  | 0.000  |
| 4673.7 | 0.122 | 0.000  | -0.000 | 0.003  | $\langle 1298   R^1, b^0, s_{\text{sym}}^1, s_{\text{asym}}^0, t^0 \rangle$ | 24.43% | 0.000  | 0.000  | 0.002  |
|        |       |        |        |        | $\langle 1298   R^1, b^2, s_{\text{sym}}^0, s_{\text{asym}}^0, t^0 \rangle$ | 20.56% | 0.000  | 0.000  | 0.000  |
|        |       |        |        |        | $\langle 1298   R^3, b^1, s_{\text{sym}}^0, s_{\text{asym}}^0, t^0 \rangle$ | 12.07% | 0.000  | 0.000  | 0.000  |
|        |       |        |        |        | $\langle 1298   R^5, b^0, s_{\text{sym}}^0, s_{\text{asym}}^0, t^0 \rangle$ | 10.48% | 0.000  | 0.000  | 0.000  |
|        |       |        |        |        | $\langle 1298   R^2, b^0, s_{\text{sym}}^0, s_{\text{asym}}^1, t^0 \rangle$ | 1.81%  | 0.000  | 0.000  | -0.004 |
|        |       |        |        |        | $\langle 1298   R^0, b^0, s_{\text{sym}}^0, s_{\text{asym}}^1, t^0 \rangle$ | 0.01%  | 0.000  | 0.000  | 0.004  |
| 4688.9 | 0.151 | -0.003 | 0.002  | -0.000 | $\langle 1314   R^3, b^1, s_{\text{sym}}^0, s_{\text{asym}}^0, t^1 \rangle$ | 21.48% | 0.000  | 0.000  | 0.000  |
|        |       |        |        |        | $\langle 1314   R^1, b^2, s_{\text{sym}}^0, s_{\text{asym}}^0, t^1 \rangle$ | 13.22% | 0.000  | 0.000  | 0.000  |

|        |       |        |        |        |                                                                           |        |        |        |        |
|--------|-------|--------|--------|--------|---------------------------------------------------------------------------|--------|--------|--------|--------|
|        |       |        |        |        | $\langle 1314 R^1, b^0, s_{\text{sym}}^0, s_{\text{asym}}^1, t^0 \rangle$ | 11.66% | 0.000  | 0.002  | 0.000  |
|        |       |        |        |        | $\langle 1314 R^1, b^0, s_{\text{sym}}^1, s_{\text{asym}}^0, t^1 \rangle$ | 7.15%  | 0.000  | 0.000  | 0.000  |
|        |       |        |        |        | $\langle 1314 R^5, b^0, s_{\text{sym}}^0, s_{\text{asym}}^0, t^1 \rangle$ | 6.02%  | 0.000  | 0.000  | 0.000  |
|        |       |        |        |        | $\langle 1314 R^1, b^0, s_{\text{sym}}^0, s_{\text{asym}}^0, t^0 \rangle$ | 0.01%  | -0.002 | -0.001 | 0.000  |
| 4947.5 | 0.101 | 0.000  | -0.000 | 0.003  | $\langle 1515 R^5, b^0, s_{\text{sym}}^0, s_{\text{asym}}^0, t^1 \rangle$ | 56.98% | 0.000  | 0.000  | 0.000  |
|        |       |        |        |        | $\langle 1515 R^0, b^1, s_{\text{sym}}^0, s_{\text{asym}}^1, t^0 \rangle$ | 0.99%  | 0.000  | 0.000  | 0.003  |
|        |       |        |        |        | $\langle 1515 R^2, b^0, s_{\text{sym}}^0, s_{\text{asym}}^1, t^0 \rangle$ | 0.20%  | 0.000  | 0.000  | -0.001 |
|        |       |        |        |        | $\langle 1515 R^0, b^0, s_{\text{sym}}^0, s_{\text{asym}}^1, t^0 \rangle$ | 0.00%  | 0.000  | 0.000  | 0.001  |
| 4951.0 | 0.352 | -0.000 | 0.000  | -0.005 | $\langle 1518 R^5, b^0, s_{\text{sym}}^0, s_{\text{asym}}^0, t^1 \rangle$ | 37.69% | 0.000  | 0.000  | 0.000  |
|        |       |        |        |        | $\langle 1518 R^0, b^3, s_{\text{sym}}^0, s_{\text{asym}}^0, t^2 \rangle$ | 8.32%  | 0.000  | 0.000  | 0.000  |
|        |       |        |        |        | $\langle 1518 R^0, b^1, s_{\text{sym}}^0, s_{\text{asym}}^1, t^0 \rangle$ | 3.63%  | 0.000  | 0.000  | -0.005 |
|        |       |        |        |        | $\langle 1518 R^2, b^0, s_{\text{sym}}^0, s_{\text{asym}}^1, t^0 \rangle$ | 0.56%  | 0.000  | 0.000  | 0.002  |
|        |       |        |        |        | $\langle 1518 R^0, b^0, s_{\text{sym}}^0, s_{\text{asym}}^1, t^0 \rangle$ | 0.00%  | 0.000  | 0.000  | -0.002 |
| 4955.1 | 0.373 | -0.000 | 0.000  | -0.005 | $\langle 1520 R^1, b^0, s_{\text{sym}}^0, s_{\text{asym}}^1, t^5 \rangle$ | 37.36% | 0.000  | 0.000  | 0.000  |
|        |       |        |        |        | $\langle 1520 R^0, b^1, s_{\text{sym}}^1, s_{\text{asym}}^0, t^1 \rangle$ | 11.44% | 0.000  | 0.000  | 0.000  |
|        |       |        |        |        | $\langle 1520 R^2, b^2, s_{\text{sym}}^0, s_{\text{asym}}^0, t^1 \rangle$ | 6.64%  | 0.000  | 0.000  | 0.000  |
|        |       |        |        |        | $\langle 1520 R^0, b^1, s_{\text{sym}}^0, s_{\text{asym}}^1, t^0 \rangle$ | 4.00%  | 0.000  | 0.000  | -0.005 |
|        |       |        |        |        | $\langle 1520 R^2, b^0, s_{\text{sym}}^0, s_{\text{asym}}^1, t^0 \rangle$ | 0.50%  | 0.000  | 0.000  | 0.002  |
|        |       |        |        |        | $\langle 1520 R^0, b^0, s_{\text{sym}}^0, s_{\text{asym}}^1, t^0 \rangle$ | 0.00%  | 0.000  | 0.000  | -0.003 |
| 4955.3 | 0.568 | -0.000 | 0.000  | -0.007 | $\langle 1521 R^1, b^0, s_{\text{sym}}^0, s_{\text{asym}}^1, t^5 \rangle$ | 33.92% | 0.000  | 0.000  | 0.000  |
|        |       |        |        |        | $\langle 1521 R^0, b^1, s_{\text{sym}}^1, s_{\text{asym}}^0, t^1 \rangle$ | 14.68% | 0.000  | 0.000  | 0.000  |
|        |       |        |        |        | $\langle 1521 R^2, b^2, s_{\text{sym}}^0, s_{\text{asym}}^0, t^1 \rangle$ | 8.61%  | 0.000  | 0.000  | 0.000  |
|        |       |        |        |        | $\langle 1521 R^0, b^1, s_{\text{sym}}^0, s_{\text{asym}}^1, t^0 \rangle$ | 6.04%  | 0.000  | 0.000  | -0.006 |
|        |       |        |        |        | $\langle 1521 R^2, b^0, s_{\text{sym}}^0, s_{\text{asym}}^1, t^0 \rangle$ | 0.78%  | 0.000  | 0.000  | 0.003  |
|        |       |        |        |        | $\langle 1521 R^0, b^0, s_{\text{sym}}^0, s_{\text{asym}}^1, t^0 \rangle$ | 0.01%  | 0.000  | 0.000  | -0.003 |
| 4957.8 | 0.340 | 0.000  | -0.000 | 0.005  | $\langle 1523 R^0, b^3, s_{\text{sym}}^0, s_{\text{asym}}^0, t^2 \rangle$ | 36.75% | 0.000  | 0.000  | 0.000  |
|        |       |        |        |        | $\langle 1523 R^0, b^1, s_{\text{sym}}^1, s_{\text{asym}}^0, t^2 \rangle$ | 14.01% | 0.000  | 0.000  | 0.000  |
|        |       |        |        |        | $\langle 1523 R^2, b^2, s_{\text{sym}}^0, s_{\text{asym}}^0, t^2 \rangle$ | 8.43%  | 0.000  | 0.000  | 0.000  |
|        |       |        |        |        | $\langle 1523 R^0, b^1, s_{\text{sym}}^0, s_{\text{asym}}^1, t^0 \rangle$ | 3.48%  | 0.000  | 0.000  | 0.005  |
|        |       |        |        |        | $\langle 1523 R^2, b^0, s_{\text{sym}}^0, s_{\text{asym}}^1, t^0 \rangle$ | 0.54%  | 0.000  | 0.000  | -0.002 |
|        |       |        |        |        | $\langle 1523 R^0, b^0, s_{\text{sym}}^0, s_{\text{asym}}^1, t^0 \rangle$ | 0.00%  | 0.000  | 0.000  | 0.003  |
| 4977.2 | 4.834 | 0.000  | -0.000 | 0.020  | $\langle 1539 R^0, b^1, s_{\text{sym}}^0, s_{\text{asym}}^1, t^0 \rangle$ | 52.91% | 0.000  | 0.000  | 0.019  |
|        |       |        |        |        | $\langle 1539 R^2, b^2, s_{\text{sym}}^0, s_{\text{asym}}^0, t^1 \rangle$ | 7.06%  | 0.000  | 0.000  | 0.000  |
|        |       |        |        |        | $\langle 1539 R^0, b^1, s_{\text{sym}}^1, s_{\text{asym}}^0, t^1 \rangle$ | 6.77%  | 0.000  | 0.000  | 0.000  |
|        |       |        |        |        | $\langle 1539 R^2, b^0, s_{\text{sym}}^0, s_{\text{asym}}^1, t^0 \rangle$ | 3.76%  | 0.000  | 0.000  | -0.006 |
|        |       |        |        |        | $\langle 1539 R^0, b^0, s_{\text{sym}}^0, s_{\text{asym}}^1, t^0 \rangle$ | 0.03%  | 0.000  | 0.000  | 0.007  |
| 5105.3 | 0.050 | 0.000  | 0.000  | -0.002 | $\langle 1645 R^0, b^1, s_{\text{sym}}^1, s_{\text{asym}}^0, t^1 \rangle$ | 20.54% | 0.000  | 0.000  | 0.000  |
|        |       |        |        |        | $\langle 1645 R^2, b^0, s_{\text{sym}}^1, s_{\text{asym}}^0, t^1 \rangle$ | 12.06% | 0.000  | 0.000  | 0.004  |
|        |       |        |        |        | $\langle 1645 R^0, b^3, s_{\text{sym}}^0, s_{\text{asym}}^0, t^1 \rangle$ | 9.03%  | 0.000  | 0.000  | 0.000  |
|        |       |        |        |        | $\langle 1645 R^0, b^1, s_{\text{sym}}^0, s_{\text{asym}}^1, t^0 \rangle$ | 0.52%  | 0.000  | 0.000  | -0.002 |
|        |       |        |        |        | $\langle 1645 R^0, b^0, s_{\text{sym}}^0, s_{\text{asym}}^1, t^1 \rangle$ | 0.01%  | 0.000  | 0.000  | -0.003 |
| 6449.2 | 0.112 | 0.002  | -0.002 | 0.000  | $\langle 2934 R^0, b^2, s_{\text{sym}}^1, s_{\text{asym}}^0, t^0 \rangle$ | 14.63% | 0.000  | -0.002 | 0.000  |

|        |       |        |        |        |                                                                             |        |        |        |        |
|--------|-------|--------|--------|--------|-----------------------------------------------------------------------------|--------|--------|--------|--------|
|        |       |        |        |        | $\langle 2934   R^2, b^3, s_{\text{sym}}^0, s_{\text{asym}}^0, t^0 \rangle$ | 12.63% | 0.000  | 0.000  | 0.000  |
|        |       |        |        |        | $\langle 2934   R^0, b^0, s_{\text{sym}}^2, s_{\text{asym}}^0, t^0 \rangle$ | 7.73%  | 0.000  | -0.002 | 0.000  |
|        |       |        |        |        | $\langle 2934   R^0, b^4, s_{\text{sym}}^0, s_{\text{asym}}^0, t^1 \rangle$ | 6.25%  | 0.000  | 0.000  | 0.000  |
|        |       |        |        |        | $\langle 2934   R^5, b^1, s_{\text{sym}}^0, s_{\text{asym}}^0, t^0 \rangle$ | 5.58%  | 0.000  | 0.000  | 0.000  |
|        |       |        |        |        | $\langle 2934   R^3, b^0, s_{\text{sym}}^1, s_{\text{asym}}^0, t^0 \rangle$ | 5.13%  | 0.000  | 0.000  | 0.000  |
|        |       |        |        |        | $\langle 2934   R^0, b^0, s_{\text{sym}}^0, s_{\text{asym}}^2, t^0 \rangle$ | 1.00%  | -0.001 | 0.003  | 0.000  |
|        |       |        |        |        | $\langle 2934   R^0, b^0, s_{\text{sym}}^1, s_{\text{asym}}^0, t^0 \rangle$ | 0.05%  | 0.001  | -0.006 | 0.000  |
|        |       |        |        |        | $\langle 2934   R^1, b^0, s_{\text{sym}}^0, s_{\text{asym}}^0, t^0 \rangle$ | 0.01%  | -0.002 | -0.001 | 0.000  |
| 6481.5 | 0.345 | 0.000  | -0.000 | -0.005 | $\langle 2962   R^0, b^0, s_{\text{sym}}^1, s_{\text{asym}}^1, t^0 \rangle$ | 18.97% | 0.000  | 0.000  | 0.027  |
|        |       |        |        |        | $\langle 2962   R^4, b^0, s_{\text{sym}}^0, s_{\text{asym}}^1, t^0 \rangle$ | 9.29%  | 0.000  | 0.000  | 0.002  |
|        |       |        |        |        | $\langle 2962   R^5, b^1, s_{\text{sym}}^0, s_{\text{asym}}^0, t^0 \rangle$ | 7.31%  | 0.000  | 0.000  | 0.000  |
|        |       |        |        |        | $\langle 2962   R^0, b^2, s_{\text{sym}}^0, s_{\text{asym}}^1, t^0 \rangle$ | 6.92%  | 0.000  | 0.000  | -0.003 |
|        |       |        |        |        | $\langle 2962   R^0, b^0, s_{\text{sym}}^0, s_{\text{asym}}^1, t^0 \rangle$ | 0.91%  | 0.000  | 0.000  | -0.037 |
| 6502.0 | 0.286 | 0.000  | -0.000 | 0.004  | $\langle 2992   R^3, b^2, s_{\text{sym}}^0, s_{\text{asym}}^0, t^0 \rangle$ | 14.05% | 0.000  | 0.000  | 0.000  |
|        |       |        |        |        | $\langle 2992   R^0, b^0, s_{\text{sym}}^1, s_{\text{asym}}^1, t^0 \rangle$ | 12.74% | 0.000  | 0.000  | -0.022 |
|        |       |        |        |        | $\langle 2992   R^5, b^1, s_{\text{sym}}^0, s_{\text{asym}}^0, t^0 \rangle$ | 5.54%  | 0.000  | 0.000  | 0.000  |
|        |       |        |        |        | $\langle 2992   R^0, b^0, s_{\text{sym}}^0, s_{\text{asym}}^1, t^0 \rangle$ | 0.72%  | 0.000  | 0.000  | 0.033  |
|        |       |        |        |        | $\langle 2992   R^0, b^0, s_{\text{sym}}^0, s_{\text{asym}}^3, t^0 \rangle$ | 0.58%  | 0.000  | 0.000  | -0.002 |
| 6506.4 | 0.093 | -0.000 | 0.000  | -0.002 | $\langle 3000   R^3, b^2, s_{\text{sym}}^0, s_{\text{asym}}^0, t^0 \rangle$ | 16.06% | 0.000  | 0.000  | 0.000  |
|        |       |        |        |        | $\langle 3000   R^0, b^0, s_{\text{sym}}^1, s_{\text{asym}}^1, t^0 \rangle$ | 4.02%  | 0.000  | 0.000  | 0.013  |
|        |       |        |        |        | $\langle 3000   R^2, b^1, s_{\text{sym}}^0, s_{\text{asym}}^1, t^0 \rangle$ | 2.31%  | 0.000  | 0.000  | 0.002  |
|        |       |        |        |        | $\langle 3000   R^0, b^0, s_{\text{sym}}^0, s_{\text{asym}}^1, t^0 \rangle$ | 0.27%  | 0.000  | 0.000  | -0.020 |
| 6509.8 | 0.305 | -0.003 | 0.003  | 0.000  | $\langle 3005   R^2, b^0, s_{\text{sym}}^0, s_{\text{asym}}^1, t^4 \rangle$ | 24.66% | 0.000  | 0.000  | 0.000  |
|        |       |        |        |        | $\langle 3005   R^0, b^0, s_{\text{sym}}^2, s_{\text{asym}}^0, t^0 \rangle$ | 11.32% | 0.000  | 0.002  | 0.000  |
|        |       |        |        |        | $\langle 3005   R^0, b^0, s_{\text{sym}}^0, s_{\text{asym}}^2, t^0 \rangle$ | 8.31%  | 0.002  | -0.010 | 0.000  |
|        |       |        |        |        | $\langle 3005   R^0, b^0, s_{\text{sym}}^1, s_{\text{asym}}^1, t^1 \rangle$ | 5.13%  | 0.000  | -0.001 | 0.000  |
|        |       |        |        |        | $\langle 3005   R^0, b^0, s_{\text{sym}}^1, s_{\text{asym}}^2, t^0 \rangle$ | 3.29%  | 0.001  | -0.003 | 0.000  |
|        |       |        |        |        | $\langle 3005   R^0, b^0, s_{\text{sym}}^1, s_{\text{asym}}^0, t^0 \rangle$ | 0.45%  | -0.004 | 0.017  | 0.000  |
| 6510.2 | 0.219 | 0.002  | -0.003 | -0.000 | $\langle 3007   R^2, b^0, s_{\text{sym}}^0, s_{\text{asym}}^1, t^4 \rangle$ | 41.07% | 0.000  | 0.000  | 0.000  |
|        |       |        |        |        | $\langle 3007   R^0, b^0, s_{\text{sym}}^2, s_{\text{asym}}^0, t^0 \rangle$ | 8.11%  | 0.000  | -0.002 | 0.000  |
|        |       |        |        |        | $\langle 3007   R^0, b^0, s_{\text{sym}}^0, s_{\text{asym}}^2, t^0 \rangle$ | 5.93%  | -0.002 | 0.008  | 0.000  |
|        |       |        |        |        | $\langle 3007   R^0, b^0, s_{\text{sym}}^1, s_{\text{asym}}^2, t^0 \rangle$ | 2.35%  | -0.001 | 0.003  | 0.000  |
|        |       |        |        |        | $\langle 3007   R^0, b^0, s_{\text{sym}}^1, s_{\text{asym}}^0, t^0 \rangle$ | 0.32%  | 0.003  | -0.014 | 0.000  |
| 6514.5 | 0.077 | -0.000 | 0.000  | 0.002  | $\langle 3014   R^3, b^2, s_{\text{sym}}^0, s_{\text{asym}}^0, t^0 \rangle$ | 39.46% | 0.000  | 0.000  | 0.000  |
|        |       |        |        |        | $\langle 3014   R^0, b^0, s_{\text{sym}}^1, s_{\text{asym}}^1, t^0 \rangle$ | 3.12%  | 0.000  | 0.000  | -0.011 |
|        |       |        |        |        | $\langle 3014   R^0, b^0, s_{\text{sym}}^0, s_{\text{asym}}^1, t^0 \rangle$ | 0.21%  | 0.000  | 0.000  | 0.018  |
|        |       |        |        |        | $\langle 3014   R^2, b^0, s_{\text{sym}}^0, s_{\text{asym}}^1, t^0 \rangle$ | 0.18%  | 0.000  | 0.000  | -0.001 |
| 6542.3 | 0.134 | 0.002  | -0.002 | 0.000  | $\langle 3041   R^0, b^2, s_{\text{sym}}^0, s_{\text{asym}}^1, t^1 \rangle$ | 24.97% | 0.000  | 0.000  | 0.000  |
|        |       |        |        |        | $\langle 3041   R^2, b^1, s_{\text{sym}}^0, s_{\text{asym}}^1, t^1 \rangle$ | 15.57% | 0.000  | 0.000  | 0.000  |
|        |       |        |        |        | $\langle 3041   R^0, b^0, s_{\text{sym}}^1, s_{\text{asym}}^1, t^1 \rangle$ | 6.02%  | 0.000  | -0.001 | 0.000  |
|        |       |        |        |        | $\langle 3041   R^0, b^0, s_{\text{sym}}^2, s_{\text{asym}}^0, t^0 \rangle$ | 5.28%  | 0.000  | -0.001 | 0.000  |
|        |       |        |        |        | $\langle 3041   R^0, b^0, s_{\text{sym}}^0, s_{\text{asym}}^2, t^0 \rangle$ | 2.36%  | -0.001 | 0.005  | 0.000  |

|        |       |        |        |        |                                                                             |        |        |        |        |
|--------|-------|--------|--------|--------|-----------------------------------------------------------------------------|--------|--------|--------|--------|
|        |       |        |        |        | $\langle 3041   R^0, b^0, s_{\text{sym}}^1, s_{\text{asym}}^2, t^0 \rangle$ | 1.01%  | -0.001 | 0.002  | 0.000  |
|        |       |        |        |        | $\langle 3041   R^0, b^0, s_{\text{sym}}^1, s_{\text{asym}}^0, t^0 \rangle$ | 0.09%  | 0.002  | -0.008 | 0.000  |
| 6544.0 | 0.105 | -0.000 | 0.000  | -0.003 | $\langle 3043   R^0, b^2, s_{\text{sym}}^0, s_{\text{asym}}^1, t^1 \rangle$ | 23.48% | 0.000  | 0.000  | 0.000  |
|        |       |        |        |        | $\langle 3043   R^2, b^1, s_{\text{sym}}^0, s_{\text{asym}}^1, t^1 \rangle$ | 14.21% | 0.000  | 0.000  | 0.000  |
|        |       |        |        |        | $\langle 3043   R^0, b^0, s_{\text{sym}}^1, s_{\text{asym}}^1, t^1 \rangle$ | 7.44%  | 0.000  | 0.000  | -0.002 |
|        |       |        |        |        | $\langle 3043   R^0, b^0, s_{\text{sym}}^1, s_{\text{asym}}^1, t^0 \rangle$ | 3.85%  | 0.000  | 0.000  | 0.012  |
|        |       |        |        |        | $\langle 3043   R^0, b^0, s_{\text{sym}}^0, s_{\text{asym}}^1, t^0 \rangle$ | 0.25%  | 0.000  | 0.000  | -0.019 |
| 6563.5 | 0.064 | -0.000 | 0.000  | 0.002  | $\langle 3057   R^0, b^2, s_{\text{sym}}^0, s_{\text{asym}}^1, t^0 \rangle$ | 21.61% | 0.000  | 0.000  | -0.005 |
|        |       |        |        |        | $\langle 3057   R^3, b^0, s_{\text{sym}}^0, s_{\text{asym}}^1, t^0 \rangle$ | 17.99% | 0.000  | 0.000  | 0.000  |
|        |       |        |        |        | $\langle 3057   R^5, b^1, s_{\text{sym}}^0, s_{\text{asym}}^0, t^0 \rangle$ | 6.09%  | 0.000  | 0.000  | 0.000  |
|        |       |        |        |        | $\langle 3057   R^0, b^0, s_{\text{sym}}^1, s_{\text{asym}}^1, t^0 \rangle$ | 1.27%  | 0.000  | 0.000  | -0.007 |
|        |       |        |        |        | $\langle 3057   R^0, b^0, s_{\text{sym}}^0, s_{\text{asym}}^1, t^0 \rangle$ | 0.20%  | 0.000  | 0.000  | 0.017  |
| 6586.8 | 0.051 | -0.000 | 0.000  | -0.002 | $\langle 3068   R^3, b^2, s_{\text{sym}}^0, s_{\text{asym}}^0, t^1 \rangle$ | 34.30% | 0.000  | 0.000  | 0.000  |
|        |       |        |        |        | $\langle 3068   R^0, b^0, s_{\text{sym}}^2, s_{\text{asym}}^0, t^1 \rangle$ | 5.16%  | 0.000  | 0.000  | -0.001 |
|        |       |        |        |        | $\langle 3068   R^0, b^0, s_{\text{sym}}^1, s_{\text{asym}}^1, t^0 \rangle$ | 1.86%  | 0.000  | 0.000  | 0.009  |
|        |       |        |        |        | $\langle 3068   R^0, b^0, s_{\text{sym}}^0, s_{\text{asym}}^1, t^0 \rangle$ | 0.10%  | 0.000  | 0.000  | -0.012 |
|        |       |        |        |        | $\langle 3068   R^0, b^0, s_{\text{sym}}^0, s_{\text{asym}}^0, t^1 \rangle$ | 0.00%  | 0.000  | 0.000  | 0.001  |
| 6587.0 | 0.173 | 0.000  | -0.000 | 0.003  | $\langle 3069   R^0, b^0, s_{\text{sym}}^2, s_{\text{asym}}^0, t^1 \rangle$ | 16.95% | 0.000  | 0.000  | 0.002  |
|        |       |        |        |        | $\langle 3069   R^0, b^0, s_{\text{sym}}^1, s_{\text{asym}}^1, t^0 \rangle$ | 6.16%  | 0.000  | 0.000  | -0.016 |
|        |       |        |        |        | $\langle 3069   R^0, b^4, s_{\text{sym}}^0, s_{\text{asym}}^0, t^1 \rangle$ | 5.50%  | 0.000  | 0.000  | 0.000  |
|        |       |        |        |        | $\langle 3069   R^3, b^2, s_{\text{sym}}^0, s_{\text{asym}}^0, t^1 \rangle$ | 5.07%  | 0.000  | 0.000  | 0.000  |
|        |       |        |        |        | $\langle 3069   R^0, b^0, s_{\text{sym}}^0, s_{\text{asym}}^2, t^1 \rangle$ | 4.51%  | 0.000  | 0.000  | 0.002  |
|        |       |        |        |        | $\langle 3069   R^0, b^0, s_{\text{sym}}^0, s_{\text{asym}}^1, t^0 \rangle$ | 0.33%  | 0.000  | 0.000  | 0.022  |
| 6612.8 | 0.074 | 0.001  | -0.002 | 0.000  | $\langle 3107   R^0, b^0, s_{\text{sym}}^1, s_{\text{asym}}^1, t^1 \rangle$ | 25.93% | 0.001  | -0.002 | 0.000  |
|        |       |        |        |        | $\langle 3107   R^0, b^0, s_{\text{sym}}^2, s_{\text{asym}}^0, t^0 \rangle$ | 5.76%  | 0.000  | -0.001 | 0.000  |
|        |       |        |        |        | $\langle 3107   R^0, b^4, s_{\text{sym}}^0, s_{\text{asym}}^0, t^0 \rangle$ | 5.47%  | 0.000  | 0.000  | 0.000  |
|        |       |        |        |        | $\langle 3107   R^3, b^0, s_{\text{sym}}^1, s_{\text{asym}}^0, t^0 \rangle$ | 0.62%  | -0.002 | -0.001 | 0.000  |
|        |       |        |        |        | $\langle 3107   R^1, b^0, s_{\text{sym}}^0, s_{\text{asym}}^0, t^0 \rangle$ | 0.00%  | 0.002  | 0.000  | 0.000  |
| 6620.2 | 0.063 | 0.000  | -0.000 | 0.002  | $\langle 3116   R^0, b^0, s_{\text{sym}}^1, s_{\text{asym}}^1, t^1 \rangle$ | 20.62% | 0.000  | 0.000  | 0.003  |
|        |       |        |        |        | $\langle 3116   R^0, b^0, s_{\text{sym}}^1, s_{\text{asym}}^1, t^0 \rangle$ | 2.31%  | 0.000  | 0.000  | -0.009 |
|        |       |        |        |        | $\langle 3116   R^0, b^0, s_{\text{sym}}^0, s_{\text{asym}}^1, t^0 \rangle$ | 0.12%  | 0.000  | 0.000  | 0.013  |
| 6732.7 | 0.053 | 0.000  | 0.002  | -0.000 | $\langle 3246   R^0, b^0, s_{\text{sym}}^2, s_{\text{asym}}^0, t^2 \rangle$ | 17.80% | 0.000  | 0.000  | 0.000  |
|        |       |        |        |        | $\langle 3246   R^0, b^0, s_{\text{sym}}^0, s_{\text{asym}}^2, t^0 \rangle$ | 15.45% | -0.003 | 0.013  | 0.000  |
|        |       |        |        |        | $\langle 3246   R^0, b^0, s_{\text{sym}}^2, s_{\text{asym}}^0, t^0 \rangle$ | 10.48% | 0.000  | 0.002  | 0.000  |
|        |       |        |        |        | $\langle 3246   R^0, b^4, s_{\text{sym}}^0, s_{\text{asym}}^0, t^2 \rangle$ | 6.22%  | 0.000  | 0.000  | 0.000  |
|        |       |        |        |        | $\langle 3246   R^0, b^2, s_{\text{sym}}^1, s_{\text{asym}}^0, t^0 \rangle$ | 5.06%  | 0.000  | -0.001 | 0.000  |
|        |       |        |        |        | $\langle 3246   R^0, b^0, s_{\text{sym}}^1, s_{\text{asym}}^0, t^0 \rangle$ | 0.19%  | 0.002  | -0.011 | 0.000  |
| 6735.1 | 0.090 | -0.000 | 0.002  | 0.000  | $\langle 3250   R^0, b^0, s_{\text{sym}}^2, s_{\text{asym}}^0, t^2 \rangle$ | 14.29% | 0.000  | 0.000  | 0.000  |
|        |       |        |        |        | $\langle 3250   R^0, b^0, s_{\text{sym}}^2, s_{\text{asym}}^0, t^0 \rangle$ | 14.20% | 0.000  | 0.002  | 0.000  |
|        |       |        |        |        | $\langle 3250   R^0, b^0, s_{\text{sym}}^0, s_{\text{asym}}^2, t^0 \rangle$ | 9.44%  | -0.002 | 0.010  | 0.000  |
|        |       |        |        |        | $\langle 3250   R^0, b^4, s_{\text{sym}}^0, s_{\text{asym}}^0, t^2 \rangle$ | 7.74%  | 0.000  | 0.000  | 0.000  |
|        |       |        |        |        | $\langle 3250   R^0, b^2, s_{\text{sym}}^1, s_{\text{asym}}^0, t^0 \rangle$ | 5.31%  | 0.000  | -0.001 | 0.000  |

$$\langle 3250 | R^0, b^0, s_{\text{sym}}^1, s_{\text{asym}}^0, t^0 \rangle \quad 0.11\% \quad 0.002 \quad -0.009 \quad 0.000$$

MeOH<sub>2</sub> ··· N<sub>2</sub>

| $\omega$ | $I$   | $\mu_x$ | $\mu_y$ | $\mu_z$ | Assignment                                                                       | $ c_n ^2$ | $\mu_x^{g \rightarrow n}$ | $\mu_y^{g \rightarrow n}$ | $\mu_z^{g \rightarrow n}$ |
|----------|-------|---------|---------|---------|----------------------------------------------------------------------------------|-----------|---------------------------|---------------------------|---------------------------|
| 4047.7   | 0.231 | -0.004  | 0.001   | -0.003  | $\langle 281   R^4, b^0, s_{\text{HB}}^0, s_{\text{free}}^0, t^1, s_X^0 \rangle$ | 17.37%    | 0.000                     | 0.000                     | 0.000                     |
|          |       |         |         |         | $\langle 281   R^1, b^0, s_{\text{HB}}^1, s_{\text{free}}^0, t^1, s_X^0 \rangle$ | 13.25%    | -0.004                    | -0.001                    | 0.002                     |
|          |       |         |         |         | $\langle 281   R^1, b^2, s_{\text{HB}}^0, s_{\text{free}}^0, t^0, s_X^0 \rangle$ | 9.05%     | 0.000                     | 0.000                     | -0.002                    |
|          |       |         |         |         | $\langle 281   R^4, b^0, s_{\text{HB}}^0, s_{\text{free}}^0, t^2, s_X^0 \rangle$ | 7.31%     | 0.000                     | 0.000                     | 0.000                     |
|          |       |         |         |         | $\langle 281   R^1, b^0, s_{\text{HB}}^1, s_{\text{free}}^0, t^0, s_X^0 \rangle$ | 4.61%     | -0.001                    | -0.005                    | 0.007                     |
|          |       |         |         |         | $\langle 281   R^1, b^0, s_{\text{HB}}^0, s_{\text{free}}^0, t^0, s_X^0 \rangle$ | 0.08%     | -0.002                    | 0.005                     | -0.007                    |
|          |       |         |         |         | $\langle 281   R^0, b^0, s_{\text{HB}}^1, s_{\text{free}}^0, t^0, s_X^0 \rangle$ | 0.02%     | 0.006                     | 0.001                     | 0.000                     |
| 4061.2   | 0.458 | 0.005   | -0.004  | 0.003   | $\langle 284   R^1, b^0, s_{\text{HB}}^1, s_{\text{free}}^0, t^0, s_X^0 \rangle$ | 26.22%    | 0.007                     | 0.002                     | -0.003                    |
|          |       |         |         |         | $\langle 284   R^4, b^0, s_{\text{HB}}^0, s_{\text{free}}^0, t^0, s_X^0 \rangle$ | 19.25%    | 0.000                     | 0.001                     | -0.001                    |
|          |       |         |         |         | $\langle 284   R^1, b^0, s_{\text{HB}}^0, s_{\text{free}}^0, t^0, s_X^0 \rangle$ | 0.06%     | 0.002                     | -0.004                    | 0.007                     |
|          |       |         |         |         | $\langle 284   R^0, b^0, s_{\text{HB}}^1, s_{\text{free}}^0, t^0, s_X^0 \rangle$ | 0.03%     | -0.008                    | -0.001                    | 0.000                     |
| 4082.8   | 0.064 | -0.001  | 0.002   | -0.001  | $\langle 287   R^2, b^1, s_{\text{HB}}^0, s_{\text{free}}^0, t^1, s_X^0 \rangle$ | 28.01%    | 0.000                     | 0.000                     | 0.000                     |
|          |       |         |         |         | $\langle 287   R^4, b^0, s_{\text{HB}}^0, s_{\text{free}}^0, t^0, s_X^0 \rangle$ | 19.33%    | 0.000                     | 0.001                     | -0.001                    |
|          |       |         |         |         | $\langle 287   R^1, b^0, s_{\text{HB}}^1, s_{\text{free}}^0, t^0, s_X^0 \rangle$ | 5.43%     | -0.005                    | -0.001                    | 0.001                     |
|          |       |         |         |         | $\langle 287   R^2, b^1, s_{\text{HB}}^0, s_{\text{free}}^0, t^0, s_X^0 \rangle$ | 5.13%     | -0.001                    | 0.001                     | 0.001                     |
|          |       |         |         |         | $\langle 287   R^1, b^0, s_{\text{HB}}^1, s_{\text{free}}^0, t^1, s_X^0 \rangle$ | 3.76%     | 0.002                     | 0.001                     | -0.001                    |
| 4087.1   | 0.130 | 0.002   | -0.002  | 0.002   | $\langle 288   R^2, b^1, s_{\text{HB}}^0, s_{\text{free}}^0, t^1, s_X^0 \rangle$ | 20.18%    | 0.000                     | 0.000                     | 0.000                     |
|          |       |         |         |         | $\langle 288   R^4, b^0, s_{\text{HB}}^0, s_{\text{free}}^0, t^0, s_X^0 \rangle$ | 18.89%    | 0.000                     | 0.000                     | 0.000                     |
|          |       |         |         |         | $\langle 288   R^1, b^0, s_{\text{HB}}^1, s_{\text{free}}^0, t^0, s_X^0 \rangle$ | 5.46%     | 0.005                     | 0.003                     | -0.003                    |
|          |       |         |         |         | $\langle 288   R^1, b^0, s_{\text{HB}}^0, s_{\text{free}}^0, t^0, s_X^0 \rangle$ | 0.02%     | 0.001                     | -0.003                    | 0.004                     |
| 4094.0   | 0.199 | -0.003  | 0.002   | -0.002  | $\langle 292   R^2, b^1, s_{\text{HB}}^0, s_{\text{free}}^0, t^2, s_X^0 \rangle$ | 19.26%    | 0.000                     | 0.000                     | 0.000                     |
|          |       |         |         |         | $\langle 292   R^4, b^0, s_{\text{HB}}^0, s_{\text{free}}^0, t^0, s_X^0 \rangle$ | 19.25%    | 0.000                     | 0.000                     | 0.000                     |
|          |       |         |         |         | $\langle 292   R^1, b^0, s_{\text{HB}}^1, s_{\text{free}}^0, t^0, s_X^0 \rangle$ | 4.97%     | -0.005                    | -0.001                    | 0.001                     |
|          |       |         |         |         | $\langle 292   R^0, b^0, s_{\text{HB}}^1, s_{\text{free}}^0, t^0, s_X^0 \rangle$ | 0.03%     | 0.007                     | 0.001                     | 0.000                     |
|          |       |         |         |         | $\langle 292   R^1, b^0, s_{\text{HB}}^0, s_{\text{free}}^0, t^0, s_X^0 \rangle$ | 0.03%     | -0.001                    | 0.003                     | -0.005                    |
| 4098.0   | 0.080 | -0.002  | 0.002   | -0.001  | $\langle 294   R^2, b^1, s_{\text{HB}}^0, s_{\text{free}}^0, t^2, s_X^0 \rangle$ | 34.20%    | 0.000                     | 0.000                     | 0.000                     |
|          |       |         |         |         | $\langle 294   R^1, b^0, s_{\text{HB}}^1, s_{\text{free}}^0, t^0, s_X^0 \rangle$ | 9.91%     | -0.003                    | -0.001                    | 0.001                     |
|          |       |         |         |         | $\langle 294   R^1, b^0, s_{\text{HB}}^1, s_{\text{free}}^0, t^1, s_X^0 \rangle$ | 6.44%     | 0.003                     | 0.001                     | -0.001                    |
|          |       |         |         |         | $\langle 294   R^2, b^1, s_{\text{HB}}^0, s_{\text{free}}^0, t^1, s_X^0 \rangle$ | 5.21%     | 0.000                     | 0.000                     | 0.000                     |

|                                                                                |       |        |        |        |                                                                                |        |        |        |        |
|--------------------------------------------------------------------------------|-------|--------|--------|--------|--------------------------------------------------------------------------------|--------|--------|--------|--------|
| 4217.8                                                                         | 0.081 | -0.002 | -0.001 | -0.001 | $\langle 321 R^1, b^2, s_{\text{HB}}^0, s_{\text{free}}^0, t^0, s_X^0 \rangle$ | 28.43% | 0.000  | 0.001  | 0.000  |
|                                                                                |       |        |        |        | $\langle 321 R^1, b^2, s_{\text{HB}}^0, s_{\text{free}}^0, t^1, s_X^0 \rangle$ | 10.11% | 0.000  | 0.000  | 0.000  |
|                                                                                |       |        |        |        | $\langle 321 R^1, b^0, s_{\text{HB}}^1, s_{\text{free}}^0, t^2, s_X^0 \rangle$ | 8.98%  | 0.000  | 0.000  | 0.000  |
|                                                                                |       |        |        |        | $\langle 321 R^3, b^1, s_{\text{HB}}^0, s_{\text{free}}^0, t^0, s_X^0 \rangle$ | 6.26%  | 0.000  | 0.000  | -0.001 |
|                                                                                |       |        |        |        | $\langle 321 R^0, b^1, s_{\text{HB}}^1, s_{\text{free}}^0, t^0, s_X^0 \rangle$ | 1.87%  | -0.003 | 0.000  | 0.001  |
|                                                                                |       |        |        |        | $\langle 321 R^2, b^0, s_{\text{HB}}^1, s_{\text{free}}^0, t^0, s_X^0 \rangle$ | 0.24%  | -0.001 | -0.001 | 0.001  |
|                                                                                |       |        |        |        | $\langle 321 R^0, b^0, s_{\text{HB}}^1, s_{\text{free}}^0, t^0, s_X^0 \rangle$ | 0.00%  | 0.002  | 0.000  | 0.000  |
| 4228.1                                                                         | 0.065 | 0.002  | -0.001 | 0.001  | $\langle 323 R^1, b^2, s_{\text{HB}}^0, s_{\text{free}}^0, t^1, s_X^0 \rangle$ | 22.03% | 0.000  | 0.000  | 0.000  |
|                                                                                |       |        |        |        | $\langle 323 R^1, b^0, s_{\text{HB}}^1, s_{\text{free}}^0, t^1, s_X^0 \rangle$ | 12.92% | 0.004  | 0.001  | -0.001 |
|                                                                                |       |        |        |        | $\langle 323 R^1, b^0, s_{\text{HB}}^1, s_{\text{free}}^0, t^2, s_X^0 \rangle$ | 7.90%  | 0.000  | 0.000  | 0.000  |
|                                                                                |       |        |        |        | $\langle 323 R^0, b^0, s_{\text{HB}}^1, s_{\text{free}}^0, t^0, s_X^0 \rangle$ | 0.02%  | -0.006 | -0.001 | 0.000  |
|                                                                                |       |        |        |        | $\langle 323 R^1, b^0, s_{\text{HB}}^0, s_{\text{free}}^0, t^0, s_X^0 \rangle$ | 0.01%  | 0.001  | -0.002 | 0.003  |
| 4233.0                                                                         | 0.058 | -0.001 | 0.002  | -0.001 | $\langle 325 R^2, b^1, s_{\text{HB}}^0, s_{\text{free}}^0, t^0, s_X^0 \rangle$ | 47.17% | -0.002 | 0.002  | 0.002  |
|                                                                                |       |        |        |        | $\langle 325 R^1, b^0, s_{\text{HB}}^1, s_{\text{free}}^0, t^0, s_X^0 \rangle$ | 3.47%  | -0.004 | -0.001 | 0.001  |
|                                                                                |       |        |        |        | $\langle 325 R^0, b^0, s_{\text{HB}}^1, s_{\text{free}}^0, t^0, s_X^0 \rangle$ | 0.01%  | 0.004  | 0.000  | 0.000  |
| 4238.1                                                                         | 0.113 | 0.003  | -0.001 | 0.001  | $\langle 326 R^1, b^0, s_{\text{HB}}^1, s_{\text{free}}^0, t^1, s_X^0 \rangle$ | 18.31% | 0.002  | 0.000  | 0.000  |
|                                                                                |       |        |        |        | $\langle 326 R^1, b^0, s_{\text{HB}}^1, s_{\text{free}}^0, t^2, s_X^0 \rangle$ | 13.49% | 0.000  | 0.000  | 0.000  |
|                                                                                |       |        |        |        | $\langle 326 R^1, b^2, s_{\text{HB}}^0, s_{\text{free}}^0, t^1, s_X^0 \rangle$ | 7.32%  | 0.000  | 0.000  | 0.000  |
|                                                                                |       |        |        |        | $\langle 326 R^1, b^0, s_{\text{HB}}^1, s_{\text{free}}^0, t^0, s_X^0 \rangle$ | 4.12%  | 0.005  | 0.001  | -0.001 |
|                                                                                |       |        |        |        | $\langle 326 R^0, b^0, s_{\text{HB}}^1, s_{\text{free}}^0, t^0, s_X^0 \rangle$ | 0.02%  | -0.007 | -0.001 | 0.000  |
|                                                                                |       |        |        |        | $\langle 326 R^1, b^0, s_{\text{HB}}^0, s_{\text{free}}^0, t^0, s_X^0 \rangle$ | 0.00%  | 0.000  | -0.001 | 0.001  |
| 4348.9                                                                         | 0.070 | 0.001  | -0.002 | 0.001  | $\langle 351 R^4, b^0, s_{\text{HB}}^0, s_{\text{free}}^0, t^0, s_X^0 \rangle$ | 32.14% | 0.000  | 0.000  | 0.000  |
|                                                                                |       |        |        |        | $\langle 351 R^1, b^0, s_{\text{HB}}^1, s_{\text{free}}^0, t^0, s_X^0 \rangle$ | 23.97% | 0.009  | 0.001  | -0.002 |
|                                                                                |       |        |        |        | $\langle 351 R^0, b^0, s_{\text{HB}}^1, s_{\text{free}}^0, t^0, s_X^0 \rangle$ | 0.03%  | -0.008 | -0.001 | 0.000  |
| 4362.2                                                                         | 2.076 | 0.002  | -0.014 | -0.000 | $\langle 355 R^1, b^0, s_{\text{HB}}^0, s_{\text{free}}^1, t^0, s_X^0 \rangle$ | 77.47% | -0.007 | 0.004  | -0.022 |
|                                                                                |       |        |        |        | $\langle 355 R^1, b^0, s_{\text{HB}}^0, s_{\text{free}}^0, t^0, s_X^0 \rangle$ | 0.81%  | 0.006  | -0.015 | 0.024  |
|                                                                                |       |        |        |        | $\langle 355 R^0, b^0, s_{\text{HB}}^1, s_{\text{free}}^0, t^0, s_X^0 \rangle$ | 0.01%  | -0.004 | 0.000  | 0.000  |
| 4376.9                                                                         | 0.114 | 0.002  | -0.002 | 0.001  | $\langle 358 R^3, b^1, s_{\text{HB}}^0, s_{\text{free}}^0, t^0, s_X^0 \rangle$ | 31.89% | 0.000  | 0.000  | -0.001 |
|                                                                                |       |        |        |        | $\langle 358 R^1, b^2, s_{\text{HB}}^0, s_{\text{free}}^0, t^0, s_X^0 \rangle$ | 12.51% | 0.000  | 0.000  | 0.000  |
|                                                                                |       |        |        |        | $\langle 358 R^2, b^0, s_{\text{HB}}^1, s_{\text{free}}^0, t^0, s_X^0 \rangle$ | 1.52%  | -0.002 | -0.001 | 0.002  |
|                                                                                |       |        |        |        | $\langle 358 R^1, b^0, s_{\text{HB}}^0, s_{\text{free}}^0, t^0, s_X^0 \rangle$ | 0.04%  | 0.001  | -0.003 | 0.005  |
|                                                                                |       |        |        |        | $\langle 358 R^0, b^0, s_{\text{HB}}^1, s_{\text{free}}^0, t^0, s_X^0 \rangle$ | 0.01%  | 0.004  | 0.000  | 0.000  |
| 4403.6                                                                         | 0.129 | 0.001  | -0.003 | 0.001  | $\langle 368 R^2, b^1, s_{\text{HB}}^0, s_{\text{free}}^0, t^1, s_X^0 \rangle$ | 32.09% | 0.000  | 0.000  | 0.000  |
|                                                                                |       |        |        |        | $\langle 368 R^1, b^0, s_{\text{HB}}^1, s_{\text{free}}^0, t^0, s_X^0 \rangle$ | 30.07% | 0.010  | 0.001  | -0.002 |
|                                                                                |       |        |        |        | $\langle 368 R^0, b^0, s_{\text{HB}}^1, s_{\text{free}}^0, t^0, s_X^0 \rangle$ | 0.04%  | -0.008 | -0.001 | 0.000  |
| 4528.4                                                                         | 0.090 | -0.002 | -0.001 | -0.001 | $\langle 402 R^1, b^2, s_{\text{HB}}^0, s_{\text{free}}^0, t^0, s_X^0 \rangle$ | 19.74% | 0.000  | 0.000  | 0.000  |
|                                                                                |       |        |        |        | $\langle 402 R^3, b^1, s_{\text{HB}}^0, s_{\text{free}}^0, t^0, s_X^0 \rangle$ | 6.41%  | 0.000  | 0.000  | 0.000  |
|                                                                                |       |        |        |        | $\langle 402 R^2, b^1, s_{\text{HB}}^0, s_{\text{free}}^0, t^2, s_X^0 \rangle$ | 5.40%  | 0.000  | 0.000  | 0.000  |
|                                                                                |       |        |        |        | $\langle 402 R^0, b^1, s_{\text{HB}}^1, s_{\text{free}}^0, t^0, s_X^0 \rangle$ | 4.71%  | -0.005 | 0.000  | 0.001  |
|                                                                                |       |        |        |        | $\langle 402 R^2, b^0, s_{\text{HB}}^1, s_{\text{free}}^0, t^0, s_X^0 \rangle$ | 4.00%  | -0.004 | -0.002 | 0.003  |
| $\langle 402 R^0, b^0, s_{\text{HB}}^1, s_{\text{free}}^0, t^0, s_X^0 \rangle$ | 0.11% | 0.015  | 0.001  | -0.001 |                                                                                |        |        |        |        |

|        |       |        |        |        |                                                                                  |        |        |        |        |
|--------|-------|--------|--------|--------|----------------------------------------------------------------------------------|--------|--------|--------|--------|
| 4555.6 | 1.086 | 0.008  | -0.004 | 0.003  | $\langle 408   R^1, b^0, s_{\text{HB}}^0, s_{\text{free}}^1, t^0, s_X^0 \rangle$ | 83.40% | 0.001  | 0.000  | 0.000  |
|        |       |        |        |        | $\langle 408   R^1, b^0, s_{\text{HB}}^0, s_{\text{free}}^0, t^0, s_X^0 \rangle$ | 0.43%  | 0.003  | 0.000  | 0.001  |
|        |       |        |        |        | $\langle 408   R^0, b^0, s_{\text{HB}}^1, s_{\text{free}}^0, t^0, s_X^0 \rangle$ | 0.00%  | 0.003  | 0.000  | 0.000  |
| 4636.2 | 0.687 | 0.003  | 0.006  | 0.003  | $\langle 430   R^0, b^1, s_{\text{HB}}^1, s_{\text{free}}^0, t^0, s_X^0 \rangle$ | 36.63% | 0.013  | 0.001  | -0.003 |
|        |       |        |        |        | $\langle 430   R^3, b^1, s_{\text{HB}}^0, s_{\text{free}}^0, t^0, s_X^0 \rangle$ | 15.14% | 0.000  | 0.000  | -0.001 |
|        |       |        |        |        | $\langle 430   R^0, b^1, s_{\text{HB}}^1, s_{\text{free}}^0, t^1, s_X^0 \rangle$ | 6.05%  | 0.000  | 0.000  | 0.000  |
|        |       |        |        |        | $\langle 430   R^0, b^1, s_{\text{HB}}^0, s_{\text{free}}^0, t^0, s_X^0 \rangle$ | 0.19%  | -0.004 | 0.004  | 0.003  |
|        |       |        |        |        | $\langle 430   R^0, b^0, s_{\text{HB}}^1, s_{\text{free}}^0, t^0, s_X^0 \rangle$ | 0.07%  | -0.012 | -0.001 | 0.001  |
| 4682.5 | 0.083 | -0.000 | -0.003 | -0.001 | $\langle 447   R^1, b^2, s_{\text{HB}}^0, s_{\text{free}}^0, t^0, s_X^0 \rangle$ | 5.21%  | 0.000  | 0.000  | 0.000  |
|        |       |        |        |        | $\langle 447   R^0, b^1, s_{\text{HB}}^1, s_{\text{free}}^0, t^0, s_X^0 \rangle$ | 4.40%  | -0.005 | 0.000  | 0.001  |
|        |       |        |        |        | $\langle 447   R^0, b^1, s_{\text{HB}}^0, s_{\text{free}}^0, t^0, s_X^0 \rangle$ | 0.05%  | 0.002  | -0.002 | -0.002 |
|        |       |        |        |        | $\langle 447   R^0, b^0, s_{\text{HB}}^1, s_{\text{free}}^0, t^0, s_X^0 \rangle$ | 0.01%  | 0.005  | 0.000  | 0.000  |
| 4704.0 | 0.118 | 0.002  | 0.002  | 0.001  | $\langle 457   R^1, b^2, s_{\text{HB}}^0, s_{\text{free}}^0, t^1, s_X^0 \rangle$ | 40.60% | 0.000  | 0.000  | 0.000  |
|        |       |        |        |        | $\langle 457   R^0, b^1, s_{\text{HB}}^1, s_{\text{free}}^0, t^0, s_X^0 \rangle$ | 6.53%  | 0.006  | 0.000  | -0.001 |
|        |       |        |        |        | $\langle 457   R^3, b^1, s_{\text{HB}}^0, s_{\text{free}}^0, t^1, s_X^0 \rangle$ | 5.41%  | 0.000  | 0.000  | 0.000  |
|        |       |        |        |        | $\langle 457   R^0, b^1, s_{\text{HB}}^0, s_{\text{free}}^0, t^0, s_X^0 \rangle$ | 0.07%  | -0.002 | 0.003  | 0.002  |
|        |       |        |        |        | $\langle 457   R^0, b^0, s_{\text{HB}}^1, s_{\text{free}}^0, t^0, s_X^0 \rangle$ | 0.01%  | -0.005 | 0.000  | 0.000  |
| 4760.4 | 0.161 | -0.001 | -0.003 | -0.001 | $\langle 467   R^1, b^0, s_{\text{HB}}^0, s_{\text{free}}^1, t^0, s_X^0 \rangle$ | 90.41% | -0.001 | -0.001 | -0.004 |
|        |       |        |        |        | $\langle 467   R^1, b^0, s_{\text{HB}}^0, s_{\text{free}}^0, t^0, s_X^0 \rangle$ | 0.01%  | 0.001  | -0.002 | 0.003  |
| 4777.1 | 0.103 | -0.001 | -0.003 | -0.001 | $\langle 474   R^2, b^0, s_{\text{HB}}^1, s_{\text{free}}^0, t^0, s_X^0 \rangle$ | 18.04% | 0.008  | 0.004  | -0.007 |
|        |       |        |        |        | $\langle 474   R^5, b^0, s_{\text{HB}}^0, s_{\text{free}}^0, t^0, s_X^0 \rangle$ | 11.29% | 0.000  | 0.000  | 0.000  |
|        |       |        |        |        | $\langle 474   R^1, b^2, s_{\text{HB}}^0, s_{\text{free}}^0, t^3, s_X^0 \rangle$ | 5.86%  | 0.000  | 0.000  | 0.000  |
|        |       |        |        |        | $\langle 474   R^0, b^1, s_{\text{HB}}^1, s_{\text{free}}^0, t^0, s_X^0 \rangle$ | 2.88%  | -0.004 | 0.000  | 0.001  |
|        |       |        |        |        | $\langle 474   R^0, b^0, s_{\text{HB}}^1, s_{\text{free}}^0, t^0, s_X^0 \rangle$ | 0.19%  | -0.019 | -0.002 | 0.001  |
| 4841.6 | 0.069 | -0.001 | -0.002 | -0.001 | $\langle 497   R^2, b^0, s_{\text{HB}}^1, s_{\text{free}}^0, t^0, s_X^0 \rangle$ | 9.56%  | 0.006  | 0.003  | -0.005 |
|        |       |        |        |        | $\langle 497   R^5, b^0, s_{\text{HB}}^0, s_{\text{free}}^0, t^1, s_X^0 \rangle$ | 9.45%  | 0.000  | 0.000  | 0.000  |
|        |       |        |        |        | $\langle 497   R^3, b^0, s_{\text{HB}}^0, s_{\text{free}}^0, t^0, s_X^0 \rangle$ | 0.73%  | 0.001  | -0.002 | 0.003  |
|        |       |        |        |        | $\langle 497   R^0, b^0, s_{\text{HB}}^1, s_{\text{free}}^0, t^0, s_X^0 \rangle$ | 0.14%  | -0.017 | -0.001 | 0.001  |
| 4847.5 | 0.071 | -0.001 | -0.002 | -0.001 | $\langle 499   R^0, b^3, s_{\text{HB}}^0, s_{\text{free}}^0, t^0, s_X^0 \rangle$ | 18.10% | 0.001  | -0.002 | -0.001 |
|        |       |        |        |        | $\langle 499   R^2, b^2, s_{\text{HB}}^0, s_{\text{free}}^0, t^0, s_X^0 \rangle$ | 9.72%  | 0.001  | -0.001 | -0.001 |
|        |       |        |        |        | $\langle 499   R^1, b^0, s_{\text{HB}}^1, s_{\text{free}}^0, t^3, s_X^0 \rangle$ | 9.04%  | 0.000  | 0.000  | 0.000  |
|        |       |        |        |        | $\langle 499   R^1, b^2, s_{\text{HB}}^0, s_{\text{free}}^0, t^2, s_X^0 \rangle$ | 6.45%  | 0.000  | 0.000  | 0.000  |
|        |       |        |        |        | $\langle 499   R^2, b^0, s_{\text{HB}}^1, s_{\text{free}}^0, t^0, s_X^0 \rangle$ | 1.20%  | -0.002 | -0.001 | 0.002  |
|        |       |        |        |        | $\langle 499   R^0, b^1, s_{\text{HB}}^1, s_{\text{free}}^0, t^0, s_X^0 \rangle$ | 1.12%  | -0.002 | 0.000  | 0.001  |
|        |       |        |        |        | $\langle 499   R^0, b^0, s_{\text{HB}}^1, s_{\text{free}}^0, t^0, s_X^0 \rangle$ | 0.02%  | 0.006  | 0.000  | 0.000  |
| 4851.7 | 0.247 | 0.002  | 0.004  | 0.002  | $\langle 501   R^0, b^3, s_{\text{HB}}^0, s_{\text{free}}^0, t^0, s_X^0 \rangle$ | 18.65% | -0.001 | 0.002  | 0.001  |
|        |       |        |        |        | $\langle 501   R^2, b^2, s_{\text{HB}}^0, s_{\text{free}}^0, t^0, s_X^0 \rangle$ | 13.81% | -0.001 | 0.001  | 0.001  |
|        |       |        |        |        | $\langle 501   R^1, b^0, s_{\text{HB}}^1, s_{\text{free}}^0, t^3, s_X^0 \rangle$ | 8.09%  | 0.000  | 0.000  | 0.000  |
|        |       |        |        |        | $\langle 501   R^0, b^1, s_{\text{HB}}^1, s_{\text{free}}^0, t^0, s_X^0 \rangle$ | 5.34%  | 0.005  | 0.000  | -0.001 |
| 4871.8 | 1.056 | -0.006 | 0.007  | -0.000 | $\langle 507   R^1, b^0, s_{\text{HB}}^0, s_{\text{free}}^1, t^0, s_X^0 \rangle$ | 84.55% | -0.004 | 0.003  | 0.000  |
|        |       |        |        |        | $\langle 507   R^1, b^0, s_{\text{HB}}^0, s_{\text{free}}^0, t^0, s_X^0 \rangle$ | 0.06%  | -0.002 | 0.004  | -0.006 |

|        |       |        |        |        |                                                                                  |        |        |        |        |
|--------|-------|--------|--------|--------|----------------------------------------------------------------------------------|--------|--------|--------|--------|
|        |       |        |        |        | $\langle 507   R^0, b^1, s_{\text{HB}}^0, s_{\text{free}}^0, t^0, s_X^0 \rangle$ | 0.03%  | -0.001 | 0.002  | 0.001  |
| 4999.9 | 0.159 | 0.002  | 0.003  | 0.001  | $\langle 556   R^0, b^3, s_{\text{HB}}^0, s_{\text{free}}^0, t^0, s_X^0 \rangle$ | 25.75% | -0.002 | 0.002  | 0.001  |
|        |       |        |        |        | $\langle 556   R^2, b^2, s_{\text{HB}}^0, s_{\text{free}}^0, t^0, s_X^0 \rangle$ | 19.98% | 0.001  | -0.001 | -0.001 |
|        |       |        |        |        | $\langle 556   R^0, b^3, s_{\text{HB}}^0, s_{\text{free}}^0, t^1, s_X^0 \rangle$ | 5.31%  | 0.000  | 0.000  | 0.000  |
|        |       |        |        |        | $\langle 556   R^2, b^0, s_{\text{HB}}^1, s_{\text{free}}^0, t^0, s_X^0 \rangle$ | 0.95%  | -0.002 | -0.001 | 0.002  |
|        |       |        |        |        | $\langle 556   R^0, b^0, s_{\text{HB}}^1, s_{\text{free}}^0, t^0, s_X^0 \rangle$ | 0.02%  | 0.006  | 0.001  | 0.000  |
| 5139.0 | 1.155 | 0.008  | 0.004  | 0.002  | $\langle 608   R^0, b^1, s_{\text{HB}}^0, s_{\text{free}}^1, t^0, s_X^0 \rangle$ | 45.95% | 0.003  | 0.008  | 0.005  |
|        |       |        |        |        | $\langle 608   R^2, b^0, s_{\text{HB}}^0, s_{\text{free}}^1, t^0, s_X^0 \rangle$ | 28.04% | 0.002  | 0.002  | 0.007  |
|        |       |        |        |        | $\langle 608   R^0, b^0, s_{\text{HB}}^0, s_{\text{free}}^1, t^0, s_X^0 \rangle$ | 0.32%  | -0.005 | -0.008 | -0.005 |
| 5235.9 | 0.104 | 0.003  | 0.001  | 0.001  | $\langle 643   R^5, b^0, s_{\text{HB}}^0, s_{\text{free}}^0, t^0, s_X^0 \rangle$ | 33.31% | 0.000  | 0.000  | 0.000  |
|        |       |        |        |        | $\langle 643   R^3, b^1, s_{\text{HB}}^0, s_{\text{free}}^0, t^1, s_X^0 \rangle$ | 9.81%  | 0.000  | 0.000  | 0.000  |
|        |       |        |        |        | $\langle 643   R^0, b^1, s_{\text{HB}}^0, s_{\text{free}}^1, t^0, s_X^0 \rangle$ | 2.19%  | 0.001  | 0.002  | 0.001  |
|        |       |        |        |        | $\langle 643   R^2, b^0, s_{\text{HB}}^0, s_{\text{free}}^1, t^0, s_X^0 \rangle$ | 2.12%  | -0.001 | -0.001 | -0.002 |
|        |       |        |        |        | $\langle 643   R^0, b^0, s_{\text{HB}}^0, s_{\text{free}}^1, t^0, s_X^0 \rangle$ | 0.04%  | 0.002  | 0.003  | 0.002  |
| 5239.0 | 1.190 | -0.009 | -0.003 | -0.002 | $\langle 644   R^0, b^1, s_{\text{HB}}^0, s_{\text{free}}^1, t^0, s_X^0 \rangle$ | 28.99% | -0.002 | -0.007 | -0.004 |
|        |       |        |        |        | $\langle 644   R^2, b^0, s_{\text{HB}}^0, s_{\text{free}}^1, t^0, s_X^0 \rangle$ | 27.20% | 0.002  | 0.002  | 0.007  |
|        |       |        |        |        | $\langle 644   R^4, b^0, s_{\text{HB}}^0, s_{\text{free}}^0, t^1, s_X^0 \rangle$ | 14.38% | 0.000  | 0.000  | 0.000  |
|        |       |        |        |        | $\langle 644   R^0, b^0, s_{\text{HB}}^0, s_{\text{free}}^1, t^0, s_X^0 \rangle$ | 0.41%  | -0.005 | -0.009 | -0.006 |
| 5239.3 | 0.241 | -0.004 | -0.001 | -0.001 | $\langle 645   R^4, b^0, s_{\text{HB}}^0, s_{\text{free}}^0, t^1, s_X^0 \rangle$ | 66.20% | 0.000  | 0.000  | 0.000  |
|        |       |        |        |        | $\langle 645   R^0, b^1, s_{\text{HB}}^0, s_{\text{free}}^1, t^0, s_X^0 \rangle$ | 5.94%  | -0.001 | -0.003 | -0.002 |
|        |       |        |        |        | $\langle 645   R^2, b^0, s_{\text{HB}}^0, s_{\text{free}}^1, t^0, s_X^0 \rangle$ | 5.58%  | 0.001  | 0.001  | 0.003  |
|        |       |        |        |        | $\langle 645   R^0, b^0, s_{\text{HB}}^0, s_{\text{free}}^1, t^0, s_X^0 \rangle$ | 0.08%  | -0.002 | -0.004 | -0.003 |
| 5384.3 | 0.244 | 0.004  | 0.001  | -0.000 | $\langle 709   R^3, b^0, s_{\text{HB}}^0, s_{\text{free}}^0, t^0, s_X^1 \rangle$ | 36.89% | 0.000  | 0.000  | 0.000  |
|        |       |        |        |        | $\langle 709   R^0, b^0, s_{\text{HB}}^1, s_{\text{free}}^0, t^0, s_X^1 \rangle$ | 27.40% | 0.003  | 0.000  | 0.000  |
|        |       |        |        |        | $\langle 709   R^1, b^1, s_{\text{HB}}^0, s_{\text{free}}^0, t^0, s_X^1 \rangle$ | 5.25%  | 0.000  | 0.000  | 0.000  |
|        |       |        |        |        | $\langle 709   R^0, b^0, s_{\text{HB}}^0, s_{\text{free}}^0, t^0, s_X^1 \rangle$ | 0.05%  | 0.002  | 0.000  | 0.000  |
|        |       |        |        |        | $\langle 709   R^0, b^0, s_{\text{HB}}^2, s_{\text{free}}^0, t^0, s_X^0 \rangle$ | 0.02%  | -0.001 | 0.000  | 0.000  |
| 5413.3 | 0.230 | -0.004 | -0.001 | 0.000  | $\langle 719   R^0, b^0, s_{\text{HB}}^1, s_{\text{free}}^0, t^0, s_X^1 \rangle$ | 24.89% | -0.003 | 0.000  | 0.000  |
|        |       |        |        |        | $\langle 719   R^3, b^0, s_{\text{HB}}^0, s_{\text{free}}^0, t^0, s_X^1 \rangle$ | 15.95% | 0.000  | 0.000  | 0.000  |
|        |       |        |        |        | $\langle 719   R^1, b^1, s_{\text{HB}}^0, s_{\text{free}}^0, t^0, s_X^1 \rangle$ | 15.30% | 0.000  | 0.000  | 0.000  |
|        |       |        |        |        | $\langle 719   R^1, b^1, s_{\text{HB}}^0, s_{\text{free}}^0, t^1, s_X^1 \rangle$ | 11.66% | 0.000  | 0.000  | 0.000  |
|        |       |        |        |        | $\langle 719   R^0, b^0, s_{\text{HB}}^1, s_{\text{free}}^0, t^1, s_X^1 \rangle$ | 7.83%  | -0.001 | 0.000  | 0.000  |
|        |       |        |        |        | $\langle 719   R^0, b^0, s_{\text{HB}}^0, s_{\text{free}}^0, t^0, s_X^1 \rangle$ | 0.07%  | -0.002 | 0.000  | 0.000  |
|        |       |        |        |        | $\langle 719   R^0, b^0, s_{\text{HB}}^1, s_{\text{free}}^0, t^0, s_X^0 \rangle$ | 0.00%  | 0.001  | 0.000  | 0.000  |
| 5434.7 | 0.142 | -0.003 | -0.000 | 0.000  | $\langle 725   R^1, b^1, s_{\text{HB}}^0, s_{\text{free}}^0, t^1, s_X^1 \rangle$ | 48.99% | 0.000  | 0.000  | 0.000  |
|        |       |        |        |        | $\langle 725   R^0, b^0, s_{\text{HB}}^1, s_{\text{free}}^0, t^0, s_X^1 \rangle$ | 18.55% | -0.002 | 0.000  | 0.000  |
|        |       |        |        |        | $\langle 725   R^3, b^0, s_{\text{HB}}^0, s_{\text{free}}^0, t^2, s_X^1 \rangle$ | 5.40%  | 0.000  | 0.000  | 0.000  |
|        |       |        |        |        | $\langle 725   R^0, b^0, s_{\text{HB}}^0, s_{\text{free}}^0, t^0, s_X^1 \rangle$ | 0.08%  | -0.002 | 0.000  | 0.000  |
|        |       |        |        |        | $\langle 725   R^0, b^0, s_{\text{HB}}^2, s_{\text{free}}^0, t^0, s_X^0 \rangle$ | 0.01%  | 0.000  | 0.000  | 0.000  |
| 5657.5 | 0.067 | 0.002  | 0.000  | 0.000  | $\langle 832   R^5, b^0, s_{\text{HB}}^0, s_{\text{free}}^0, t^2, s_X^0 \rangle$ | 15.00% | 0.000  | 0.000  | 0.000  |
|        |       |        |        |        | $\langle 832   R^1, b^1, s_{\text{HB}}^1, s_{\text{free}}^0, t^0, s_X^0 \rangle$ | 5.56%  | 0.000  | 0.000  | 0.000  |
|        |       |        |        |        | $\langle 832   R^3, b^0, s_{\text{HB}}^1, s_{\text{free}}^0, t^0, s_X^0 \rangle$ | 3.83%  | 0.000  | -0.002 | 0.004  |

|        |       |        |        |        |                                                                                |        |        |        |        |
|--------|-------|--------|--------|--------|--------------------------------------------------------------------------------|--------|--------|--------|--------|
|        |       |        |        |        | $\langle 832 R^0, b^0, s_{\text{HB}}^2, s_{\text{free}}^0, t^0, s_X^0 \rangle$ | 2.44%  | 0.008  | 0.000  | -0.001 |
|        |       |        |        |        | $\langle 832 R^0, b^0, s_{\text{HB}}^1, s_{\text{free}}^0, t^0, s_X^0 \rangle$ | 0.00%  | -0.002 | 0.000  | 0.000  |
| 5828.4 | 0.131 | 0.003  | 0.000  | 0.000  | $\langle 918 R^2, b^0, s_{\text{HB}}^1, s_{\text{free}}^0, t^3, s_X^0 \rangle$ | 15.98% | 0.000  | 0.000  | 0.000  |
|        |       |        |        |        | $\langle 918 R^3, b^1, s_{\text{HB}}^0, s_{\text{free}}^0, t^3, s_X^0 \rangle$ | 6.71%  | 0.000  | 0.000  | 0.000  |
|        |       |        |        |        | $\langle 918 R^0, b^0, s_{\text{HB}}^2, s_{\text{free}}^0, t^1, s_X^0 \rangle$ | 3.29%  | -0.003 | 0.000  | 0.000  |
|        |       |        |        |        | $\langle 918 R^0, b^0, s_{\text{HB}}^2, s_{\text{free}}^0, t^0, s_X^0 \rangle$ | 1.21%  | 0.005  | 0.000  | -0.001 |
|        |       |        |        |        | $\langle 918 R^0, b^0, s_{\text{HB}}^0, s_{\text{free}}^0, t^1, s_X^0 \rangle$ | 0.00%  | 0.001  | 0.000  | 0.000  |
| 5830.1 | 0.268 | 0.004  | 0.000  | 0.000  | $\langle 920 R^2, b^2, s_{\text{HB}}^0, s_{\text{free}}^0, t^1, s_X^0 \rangle$ | 7.50%  | 0.000  | 0.000  | 0.000  |
|        |       |        |        |        | $\langle 920 R^0, b^0, s_{\text{HB}}^2, s_{\text{free}}^0, t^1, s_X^0 \rangle$ | 6.99%  | -0.004 | -0.001 | 0.000  |
|        |       |        |        |        | $\langle 920 R^1, b^1, s_{\text{HB}}^1, s_{\text{free}}^0, t^1, s_X^0 \rangle$ | 6.36%  | -0.001 | 0.000  | 0.000  |
|        |       |        |        |        | $\langle 920 R^2, b^0, s_{\text{HB}}^1, s_{\text{free}}^0, t^3, s_X^0 \rangle$ | 5.16%  | 0.000  | 0.000  | 0.000  |
|        |       |        |        |        | $\langle 920 R^0, b^0, s_{\text{HB}}^2, s_{\text{free}}^0, t^0, s_X^0 \rangle$ | 2.47%  | 0.008  | 0.000  | -0.001 |
|        |       |        |        |        | $\langle 920 R^0, b^0, s_{\text{HB}}^0, s_{\text{free}}^0, t^1, s_X^0 \rangle$ | 0.01%  | 0.002  | 0.000  | 0.000  |
| 5841.4 | 0.125 | 0.003  | 0.000  | 0.000  | $\langle 923 R^2, b^0, s_{\text{HB}}^0, s_{\text{free}}^1, t^1, s_X^0 \rangle$ | 56.95% | 0.001  | 0.000  | 0.000  |
|        |       |        |        |        | $\langle 923 R^0, b^0, s_{\text{HB}}^2, s_{\text{free}}^0, t^0, s_X^0 \rangle$ | 2.27%  | 0.007  | 0.000  | -0.001 |
|        |       |        |        |        | $\langle 923 R^0, b^0, s_{\text{HB}}^1, s_{\text{free}}^0, t^0, s_X^0 \rangle$ | 0.01%  | -0.004 | 0.000  | 0.000  |
|        |       |        |        |        | $\langle 923 R^0, b^0, s_{\text{HB}}^0, s_{\text{free}}^0, t^1, s_X^0 \rangle$ | 0.01%  | -0.003 | 0.000  | 0.000  |
| 5844.6 | 0.166 | 0.003  | 0.000  | 0.000  | $\langle 925 R^2, b^2, s_{\text{HB}}^0, s_{\text{free}}^0, t^0, s_X^0 \rangle$ | 9.24%  | 0.000  | 0.000  | 0.000  |
|        |       |        |        |        | $\langle 925 R^2, b^0, s_{\text{HB}}^0, s_{\text{free}}^1, t^1, s_X^0 \rangle$ | 7.24%  | 0.000  | 0.000  | 0.000  |
|        |       |        |        |        | $\langle 925 R^5, b^0, s_{\text{HB}}^0, s_{\text{free}}^0, t^2, s_X^0 \rangle$ | 6.83%  | 0.000  | 0.000  | 0.000  |
|        |       |        |        |        | $\langle 925 R^1, b^1, s_{\text{HB}}^1, s_{\text{free}}^0, t^0, s_X^0 \rangle$ | 6.06%  | 0.000  | 0.000  | 0.000  |
|        |       |        |        |        | $\langle 925 R^0, b^0, s_{\text{HB}}^2, s_{\text{free}}^0, t^0, s_X^0 \rangle$ | 3.25%  | 0.009  | 0.000  | -0.001 |
|        |       |        |        |        | $\langle 925 R^0, b^0, s_{\text{HB}}^1, s_{\text{free}}^1, t^0, s_X^0 \rangle$ | 0.11%  | -0.001 | 0.000  | 0.000  |
|        |       |        |        |        | $\langle 925 R^0, b^0, s_{\text{HB}}^1, s_{\text{free}}^0, t^0, s_X^0 \rangle$ | 0.01%  | -0.005 | 0.000  | 0.000  |
| 5847.3 | 0.058 | -0.002 | -0.000 | -0.000 | $\langle 926 R^5, b^0, s_{\text{HB}}^0, s_{\text{free}}^0, t^0, s_X^0 \rangle$ | 45.59% | 0.000  | 0.000  | 0.000  |
|        |       |        |        |        | $\langle 926 R^4, b^0, s_{\text{HB}}^0, s_{\text{free}}^0, t^3, s_X^0 \rangle$ | 12.18% | 0.000  | 0.000  | 0.000  |
|        |       |        |        |        | $\langle 926 R^0, b^0, s_{\text{HB}}^2, s_{\text{free}}^0, t^0, s_X^0 \rangle$ | 1.08%  | -0.005 | 0.000  | 0.001  |
|        |       |        |        |        | $\langle 926 R^2, b^0, s_{\text{HB}}^1, s_{\text{free}}^0, t^0, s_X^0 \rangle$ | 0.16%  | -0.001 | 0.000  | 0.000  |
|        |       |        |        |        | $\langle 926 R^0, b^0, s_{\text{HB}}^1, s_{\text{free}}^0, t^0, s_X^0 \rangle$ | 0.00%  | 0.003  | 0.000  | 0.000  |
| 5847.4 | 0.129 | 0.003  | 0.000  | 0.000  | $\langle 927 R^4, b^0, s_{\text{HB}}^0, s_{\text{free}}^0, t^3, s_X^0 \rangle$ | 28.44% | 0.000  | 0.000  | 0.000  |
|        |       |        |        |        | $\langle 927 R^5, b^0, s_{\text{HB}}^0, s_{\text{free}}^0, t^0, s_X^0 \rangle$ | 17.30% | 0.000  | 0.000  | 0.000  |
|        |       |        |        |        | $\langle 927 R^0, b^0, s_{\text{HB}}^2, s_{\text{free}}^0, t^0, s_X^0 \rangle$ | 2.34%  | 0.007  | 0.000  | -0.001 |
|        |       |        |        |        | $\langle 927 R^2, b^0, s_{\text{HB}}^1, s_{\text{free}}^0, t^0, s_X^0 \rangle$ | 0.37%  | 0.002  | 0.000  | 0.000  |
|        |       |        |        |        | $\langle 927 R^0, b^0, s_{\text{HB}}^1, s_{\text{free}}^0, t^0, s_X^0 \rangle$ | 0.02%  | -0.006 | 0.000  | 0.000  |
| 5865.1 | 0.054 | 0.002  | 0.000  | 0.000  | $\langle 932 R^5, b^0, s_{\text{HB}}^0, s_{\text{free}}^0, t^0, s_X^0 \rangle$ | 18.85% | 0.000  | 0.000  | 0.000  |
|        |       |        |        |        | $\langle 932 R^2, b^2, s_{\text{HB}}^0, s_{\text{free}}^0, t^1, s_X^0 \rangle$ | 7.40%  | 0.000  | 0.000  | 0.000  |
|        |       |        |        |        | $\langle 932 R^2, b^0, s_{\text{HB}}^1, s_{\text{free}}^0, t^0, s_X^0 \rangle$ | 0.88%  | 0.003  | 0.000  | 0.000  |
|        |       |        |        |        | $\langle 932 R^0, b^0, s_{\text{HB}}^2, s_{\text{free}}^0, t^0, s_X^0 \rangle$ | 0.63%  | 0.004  | 0.000  | -0.001 |
|        |       |        |        |        | $\langle 932 R^0, b^0, s_{\text{HB}}^1, s_{\text{free}}^0, t^0, s_X^0 \rangle$ | 0.00%  | -0.003 | 0.000  | 0.000  |
| 5879.7 | 0.096 | -0.002 | 0.001  | 0.000  | $\langle 939 R^2, b^0, s_{\text{HB}}^0, s_{\text{free}}^1, t^0, s_X^0 \rangle$ | 35.58% | 0.000  | 0.000  | 0.000  |
|        |       |        |        |        | $\langle 939 R^5, b^0, s_{\text{HB}}^0, s_{\text{free}}^0, t^1, s_X^0 \rangle$ | 6.49%  | 0.000  | 0.000  | 0.000  |
|        |       |        |        |        | $\langle 939 R^0, b^0, s_{\text{HB}}^2, s_{\text{free}}^0, t^0, s_X^0 \rangle$ | 2.05%  | -0.007 | 0.000  | 0.001  |

|        |       |        |        |        |                                                                                   |        |        |        |        |
|--------|-------|--------|--------|--------|-----------------------------------------------------------------------------------|--------|--------|--------|--------|
|        |       |        |        |        | $\langle 939   R^0, b^0, s_{\text{HB}}^1, s_{\text{free}}^0, t^0, s_X^0 \rangle$  | 0.01%  | 0.005  | 0.000  | 0.000  |
| 5894.4 | 0.092 | -0.002 | -0.000 | -0.000 | $\langle 949   R^2, b^0, s_{\text{HB}}^1, s_{\text{free}}^0, t^4, s_X^0 \rangle$  | 54.77% | 0.000  | 0.000  | 0.000  |
|        |       |        |        |        | $\langle 949   R^2, b^0, s_{\text{HB}}^1, s_{\text{free}}^0, t^3, s_X^0 \rangle$  | 9.31%  | 0.000  | 0.000  | 0.000  |
|        |       |        |        |        | $\langle 949   R^0, b^0, s_{\text{HB}}^2, s_{\text{free}}^0, t^0, s_X^0 \rangle$  | 1.24%  | -0.005 | 0.000  | 0.001  |
|        |       |        |        |        | $\langle 949   R^0, b^0, s_{\text{HB}}^2, s_{\text{free}}^0, t^1, s_X^0 \rangle$  | 0.47%  | 0.001  | 0.000  | 0.000  |
|        |       |        |        |        | $\langle 949   R^0, b^0, s_{\text{HB}}^1, s_{\text{free}}^0, t^0, s_X^0 \rangle$  | 0.00%  | 0.001  | 0.000  | 0.000  |
| 5895.5 | 1.142 | 0.009  | 0.000  | 0.001  | $\langle 950   R^2, b^2, s_{\text{HB}}^0, s_{\text{free}}^0, t^0, s_X^0 \rangle$  | 17.97% | 0.000  | 0.000  | 0.000  |
|        |       |        |        |        | $\langle 950   R^0, b^0, s_{\text{HB}}^2, s_{\text{free}}^0, t^0, s_X^0 \rangle$  | 15.91% | 0.019  | 0.001  | -0.003 |
|        |       |        |        |        | $\langle 950   R^0, b^0, s_{\text{HB}}^2, s_{\text{free}}^0, t^1, s_X^0 \rangle$  | 5.71%  | -0.003 | 0.000  | 0.000  |
|        |       |        |        |        | $\langle 950   R^0, b^0, s_{\text{HB}}^1, s_{\text{free}}^0, t^0, s_X^0 \rangle$  | 0.02%  | -0.006 | 0.000  | 0.000  |
| 5913.4 | 0.148 | 0.003  | 0.000  | 0.000  | $\langle 962   R^1, b^3, s_{\text{HB}}^0, s_{\text{free}}^0, t^1, s_X^0 \rangle$  | 21.43% | 0.000  | 0.000  | 0.000  |
|        |       |        |        |        | $\langle 962   R^3, b^0, s_{\text{HB}}^1, s_{\text{free}}^0, t^1, s_X^0 \rangle$  | 13.90% | 0.000  | 0.000  | 0.000  |
|        |       |        |        |        | $\langle 962   R^4, b^1, s_{\text{HB}}^0, s_{\text{free}}^0, t^1, s_X^0 \rangle$  | 7.91%  | 0.000  | 0.000  | 0.000  |
|        |       |        |        |        | $\langle 962   R^0, b^0, s_{\text{HB}}^2, s_{\text{free}}^0, t^0, s_X^0 \rangle$  | 2.67%  | 0.008  | 0.000  | -0.001 |
|        |       |        |        |        | $\langle 962   R^3, b^0, s_{\text{HB}}^1, s_{\text{free}}^0, t^0, s_X^0 \rangle$  | 0.16%  | 0.000  | 0.000  | 0.001  |
|        |       |        |        |        | $\langle 962   R^0, b^0, s_{\text{HB}}^1, s_{\text{free}}^0, t^0, s_X^0 \rangle$  | 0.01%  | -0.005 | 0.000  | 0.000  |
| 5923.5 | 0.054 | -0.002 | -0.000 | -0.000 | $\langle 968   R^1, b^3, s_{\text{HB}}^0, s_{\text{free}}^0, t^1, s_X^0 \rangle$  | 24.04% | 0.000  | 0.000  | 0.000  |
|        |       |        |        |        | $\langle 968   R^4, b^1, s_{\text{HB}}^0, s_{\text{free}}^0, t^1, s_X^0 \rangle$  | 7.94%  | 0.000  | 0.000  | 0.000  |
|        |       |        |        |        | $\langle 968   R^0, b^0, s_{\text{HB}}^2, s_{\text{free}}^0, t^0, s_X^0 \rangle$  | 1.03%  | -0.005 | 0.000  | 0.001  |
|        |       |        |        |        | $\langle 968   R^3, b^0, s_{\text{HB}}^1, s_{\text{free}}^0, t^0, s_X^0 \rangle$  | 0.05%  | 0.000  | 0.000  | 0.000  |
|        |       |        |        |        | $\langle 968   R^0, b^0, s_{\text{HB}}^1, s_{\text{free}}^0, t^0, s_X^0 \rangle$  | 0.00%  | 0.003  | 0.000  | 0.000  |
| 6001.3 | 0.149 | 0.003  | -0.000 | 0.000  | $\langle 1006   R^1, b^1, s_{\text{HB}}^1, s_{\text{free}}^0, t^0, s_X^0 \rangle$ | 13.66% | 0.000  | 0.000  | 0.000  |
|        |       |        |        |        | $\langle 1006   R^5, b^0, s_{\text{HB}}^0, s_{\text{free}}^0, t^1, s_X^0 \rangle$ | 6.37%  | 0.000  | 0.000  | 0.000  |
|        |       |        |        |        | $\langle 1006   R^0, b^0, s_{\text{HB}}^2, s_{\text{free}}^0, t^0, s_X^0 \rangle$ | 1.52%  | 0.006  | 0.000  | -0.001 |
|        |       |        |        |        | $\langle 1006   R^0, b^0, s_{\text{HB}}^2, s_{\text{free}}^0, t^1, s_X^0 \rangle$ | 0.82%  | -0.001 | 0.000  | 0.000  |
|        |       |        |        |        | $\langle 1006   R^0, b^0, s_{\text{HB}}^1, s_{\text{free}}^0, t^0, s_X^0 \rangle$ | 0.00%  | -0.003 | 0.000  | 0.000  |
| 6018.6 | 0.199 | 0.004  | -0.000 | 0.000  | $\langle 1019   R^2, b^2, s_{\text{HB}}^0, s_{\text{free}}^0, t^2, s_X^0 \rangle$ | 6.13%  | 0.000  | 0.000  | 0.000  |
|        |       |        |        |        | $\langle 1019   R^0, b^0, s_{\text{HB}}^2, s_{\text{free}}^0, t^0, s_X^0 \rangle$ | 5.22%  | 0.011  | 0.000  | -0.001 |
|        |       |        |        |        | $\langle 1019   R^1, b^1, s_{\text{HB}}^1, s_{\text{free}}^0, t^1, s_X^0 \rangle$ | 5.05%  | 0.000  | 0.000  | 0.000  |
|        |       |        |        |        | $\langle 1019   R^0, b^0, s_{\text{HB}}^2, s_{\text{free}}^0, t^1, s_X^0 \rangle$ | 0.87%  | 0.001  | 0.000  | 0.000  |
|        |       |        |        |        | $\langle 1019   R^0, b^0, s_{\text{HB}}^1, s_{\text{free}}^0, t^0, s_X^0 \rangle$ | 0.04%  | -0.009 | -0.001 | 0.000  |
| 6019.6 | 0.159 | -0.003 | -0.000 | -0.000 | $\langle 1020   R^3, b^2, s_{\text{HB}}^0, s_{\text{free}}^0, t^0, s_X^0 \rangle$ | 13.41% | 0.000  | 0.000  | 0.000  |
|        |       |        |        |        | $\langle 1020   R^0, b^0, s_{\text{HB}}^2, s_{\text{free}}^0, t^0, s_X^0 \rangle$ | 3.18%  | -0.009 | 0.000  | 0.001  |
|        |       |        |        |        | $\langle 1020   R^1, b^0, s_{\text{HB}}^1, s_{\text{free}}^0, t^0, s_X^0 \rangle$ | 0.16%  | 0.000  | 0.001  | -0.001 |
|        |       |        |        |        | $\langle 1020   R^0, b^0, s_{\text{HB}}^1, s_{\text{free}}^0, t^0, s_X^0 \rangle$ | 0.02%  | 0.006  | 0.001  | 0.000  |
| 6078.5 | 0.325 | -0.005 | 0.000  | -0.000 | $\langle 1059   R^2, b^2, s_{\text{HB}}^0, s_{\text{free}}^0, t^1, s_X^0 \rangle$ | 18.59% | 0.000  | 0.000  | 0.000  |
|        |       |        |        |        | $\langle 1059   R^0, b^0, s_{\text{HB}}^2, s_{\text{free}}^0, t^0, s_X^0 \rangle$ | 8.31%  | -0.014 | 0.000  | 0.002  |
|        |       |        |        |        | $\langle 1059   R^0, b^0, s_{\text{HB}}^2, s_{\text{free}}^0, t^1, s_X^0 \rangle$ | 5.25%  | -0.003 | 0.000  | 0.000  |
|        |       |        |        |        | $\langle 1059   R^0, b^0, s_{\text{HB}}^1, s_{\text{free}}^0, t^0, s_X^0 \rangle$ | 0.07%  | 0.012  | 0.001  | -0.001 |
| 6079.2 | 0.061 | -0.002 | 0.000  | -0.000 | $\langle 1060   R^4, b^1, s_{\text{HB}}^0, s_{\text{free}}^0, t^0, s_X^0 \rangle$ | 35.79% | 0.000  | 0.000  | 0.000  |
|        |       |        |        |        | $\langle 1060   R^0, b^0, s_{\text{HB}}^2, s_{\text{free}}^0, t^0, s_X^0 \rangle$ | 1.16%  | -0.005 | 0.000  | 0.001  |
|        |       |        |        |        | $\langle 1060   R^0, b^0, s_{\text{HB}}^2, s_{\text{free}}^0, t^1, s_X^0 \rangle$ | 0.79%  | -0.001 | 0.000  | 0.000  |

|        |       |        |        |        |                                                                                   |        |        |        |        |
|--------|-------|--------|--------|--------|-----------------------------------------------------------------------------------|--------|--------|--------|--------|
|        |       |        |        |        | $\langle 1060   R^0, b^0, s_{\text{HB}}^1, s_{\text{free}}^0, t^0, s_X^0 \rangle$ | 0.01%  | 0.005  | 0.000  | 0.000  |
| 6257.8 | 0.060 | 0.002  | 0.000  | 0.000  | $\langle 1162   R^0, b^2, s_{\text{HB}}^1, s_{\text{free}}^0, t^0, s_X^0 \rangle$ | 13.75% | -0.003 | 0.000  | 0.000  |
|        |       |        |        |        | $\langle 1162   R^1, b^3, s_{\text{HB}}^0, s_{\text{free}}^0, t^0, s_X^0 \rangle$ | 7.52%  | 0.000  | 0.000  | 0.000  |
|        |       |        |        |        | $\langle 1162   R^0, b^2, s_{\text{HB}}^1, s_{\text{free}}^0, t^1, s_X^0 \rangle$ | 5.34%  | 0.000  | 0.000  | 0.000  |
|        |       |        |        |        | $\langle 1162   R^1, b^3, s_{\text{HB}}^0, s_{\text{free}}^0, t^2, s_X^0 \rangle$ | 5.20%  | 0.000  | 0.000  | 0.000  |
|        |       |        |        |        | $\langle 1162   R^0, b^0, s_{\text{HB}}^2, s_{\text{free}}^0, t^0, s_X^0 \rangle$ | 0.15%  | 0.002  | 0.000  | 0.000  |
|        |       |        |        |        | $\langle 1162   R^0, b^0, s_{\text{HB}}^1, s_{\text{free}}^0, t^0, s_X^0 \rangle$ | 0.01%  | 0.005  | 0.000  | 0.000  |
| 6608.8 | 0.088 | 0.000  | 0.002  | 0.001  | $\langle 1390   R^0, b^0, s_{\text{HB}}^1, s_{\text{free}}^1, t^0, s_X^0 \rangle$ | 14.14% | -0.012 | 0.003  | 0.003  |
|        |       |        |        |        | $\langle 1390   R^1, b^1, s_{\text{HB}}^0, s_{\text{free}}^1, t^1, s_X^0 \rangle$ | 8.91%  | 0.000  | 0.000  | 0.000  |
|        |       |        |        |        | $\langle 1390   R^0, b^0, s_{\text{HB}}^1, s_{\text{free}}^0, t^0, s_X^0 \rangle$ | 0.11%  | 0.015  | 0.001  | -0.001 |
|        |       |        |        |        | $\langle 1390   R^0, b^0, s_{\text{HB}}^0, s_{\text{free}}^1, t^0, s_X^0 \rangle$ | 0.02%  | -0.001 | -0.002 | -0.001 |
| 6626.7 | 0.075 | -0.000 | -0.002 | -0.001 | $\langle 1407   R^1, b^1, s_{\text{HB}}^0, s_{\text{free}}^1, t^1, s_X^0 \rangle$ | 19.21% | -0.001 | 0.000  | 0.000  |
|        |       |        |        |        | $\langle 1407   R^0, b^0, s_{\text{HB}}^1, s_{\text{free}}^1, t^0, s_X^0 \rangle$ | 12.80% | 0.011  | -0.003 | -0.003 |
|        |       |        |        |        | $\langle 1407   R^0, b^0, s_{\text{HB}}^1, s_{\text{free}}^0, t^0, s_X^0 \rangle$ | 0.10%  | -0.014 | -0.001 | 0.001  |
|        |       |        |        |        | $\langle 1407   R^0, b^0, s_{\text{HB}}^0, s_{\text{free}}^1, t^0, s_X^0 \rangle$ | 0.02%  | 0.001  | 0.002  | 0.001  |
| 6988.6 | 2.925 | -0.002 | -0.011 | -0.005 | $\langle 1679   R^0, b^0, s_{\text{HB}}^0, s_{\text{free}}^2, t^0, s_X^0 \rangle$ | 86.27% | -0.015 | -0.021 | -0.013 |
|        |       |        |        |        | $\langle 1679   R^0, b^0, s_{\text{HB}}^0, s_{\text{free}}^1, t^0, s_X^0 \rangle$ | 0.42%  | 0.005  | 0.009  | 0.006  |
|        |       |        |        |        | $\langle 1679   R^0, b^0, s_{\text{HB}}^1, s_{\text{free}}^0, t^0, s_X^0 \rangle$ | 0.01%  | 0.004  | 0.000  | 0.000  |

---

MeOH<sub>2</sub> ··· (CO)<sub>2</sub>

---

| $\omega$ | $I$   | $\mu_x$ | $\mu_y$ | $\mu_z$ | Assignment                                                                         | $ c_n ^2$ | $\mu_x^{g \rightarrow n}$ | $\mu_y^{g \rightarrow n}$ | $\mu_z^{g \rightarrow n}$ |
|----------|-------|---------|---------|---------|------------------------------------------------------------------------------------|-----------|---------------------------|---------------------------|---------------------------|
| 4016.4   | 0.061 | -0.000  | -0.000  | -0.002  | $\langle 905   R^1, b^0, s_{\text{sym}}^1, s_{\text{asym}}^0, t^0, s_X^0 \rangle$  | 47.69%    | 0.000                     | 0.000                     | -0.002                    |
|          |       |         |         |         | $\langle 905   R^0, b^0, s_{\text{sym}}^1, s_{\text{asym}}^1, t^0, s_X^0 \rangle$  | 0.04%     | 0.000                     | 0.000                     | 0.003                     |
| 4039.9   | 0.123 | 0.000   | 0.000   | 0.003   | $\langle 929   R^1, b^0, s_{\text{sym}}^1, s_{\text{asym}}^0, t^1, s_X^0 \rangle$  | 19.16%    | 0.000                     | 0.000                     | 0.002                     |
|          |       |         |         |         | $\langle 929   R^1, b^0, s_{\text{sym}}^0, s_{\text{asym}}^1, t^0, s_X^0 \rangle$  | 4.81%     | 0.000                     | 0.000                     | 0.005                     |
|          |       |         |         |         | $\langle 929   R^0, b^1, s_{\text{sym}}^0, s_{\text{asym}}^1, t^0, s_X^0 \rangle$  | 0.24%     | 0.000                     | 0.000                     | 0.002                     |
|          |       |         |         |         | $\langle 929   R^0, b^0, s_{\text{sym}}^0, s_{\text{asym}}^1, t^0, s_X^0 \rangle$  | 0.00%     | 0.000                     | 0.000                     | -0.003                    |
| 4079.1   | 0.092 | -0.000  | -0.000  | 0.003   | $\langle 972   R^1, b^0, s_{\text{sym}}^0, s_{\text{asym}}^1, t^0, s_X^0 \rangle$  | 31.16%    | 0.000                     | 0.000                     | 0.002                     |
|          |       |         |         |         | $\langle 972   R^2, b^1, s_{\text{sym}}^0, s_{\text{asym}}^0, t^1, s_X^0 \rangle$  | 28.20%    | 0.000                     | 0.000                     | 0.000                     |
|          |       |         |         |         | $\langle 972   R^2, b^1, s_{\text{sym}}^0, s_{\text{asym}}^0, t^0, s_X^0 \rangle$  | 16.33%    | 0.000                     | 0.000                     | 0.000                     |
|          |       |         |         |         | $\langle 972   R^0, b^1, s_{\text{sym}}^0, s_{\text{asym}}^1, t^0, s_X^0 \rangle$  | 0.42%     | 0.000                     | 0.000                     | 0.002                     |
|          |       |         |         |         | $\langle 972   R^0, b^0, s_{\text{sym}}^0, s_{\text{asym}}^1, t^0, s_X^0 \rangle$  | 0.00%     | 0.000                     | 0.000                     | -0.004                    |
| 4185.9   | 0.060 | 0.002   | -0.001  | 0.000   | $\langle 1052   R^3, b^0, s_{\text{sym}}^0, s_{\text{asym}}^0, t^1, s_X^0 \rangle$ | 37.18%    | 0.000                     | 0.000                     | 0.000                     |
|          |       |         |         |         | $\langle 1052   R^1, b^2, s_{\text{sym}}^0, s_{\text{asym}}^0, t^0, s_X^0 \rangle$ | 20.97%    | 0.002                     | 0.000                     | 0.000                     |
|          |       |         |         |         | $\langle 1052   R^1, b^0, s_{\text{sym}}^0, s_{\text{asym}}^1, t^0, s_X^0 \rangle$ | 3.37%     | 0.000                     | -0.002                    | 0.000                     |
|          |       |         |         |         | $\langle 1052   R^0, b^0, s_{\text{sym}}^1, s_{\text{asym}}^0, t^0, s_X^0 \rangle$ | 0.02%     | 0.000                     | 0.005                     | 0.000                     |

|        |       |        |        |        |                                                                                    |        |        |        |        |
|--------|-------|--------|--------|--------|------------------------------------------------------------------------------------|--------|--------|--------|--------|
| 4205.1 | 0.094 | 0.002  | -0.002 | 0.000  | $\langle 1069   R^1, b^0, s_{\text{sym}}^1, s_{\text{asym}}^0, t^2, s_X^0 \rangle$ | 9.00%  | 0.000  | 0.000  | 0.000  |
|        |       |        |        |        | $\langle 1069   R^1, b^0, s_{\text{sym}}^0, s_{\text{asym}}^1, t^0, s_X^0 \rangle$ | 7.42%  | -0.001 | -0.003 | 0.000  |
|        |       |        |        |        | $\langle 1069   R^2, b^1, s_{\text{sym}}^0, s_{\text{asym}}^0, t^0, s_X^0 \rangle$ | 5.15%  | 0.000  | 0.000  | 0.000  |
|        |       |        |        |        | $\langle 1069   R^1, b^0, s_{\text{sym}}^0, s_{\text{asym}}^0, t^0, s_X^0 \rangle$ | 0.02%  | 0.003  | 0.000  | 0.000  |
|        |       |        |        |        | $\langle 1069   R^0, b^0, s_{\text{sym}}^1, s_{\text{asym}}^0, t^0, s_X^0 \rangle$ | 0.01%  | 0.000  | 0.004  | 0.000  |
| 4209.5 | 0.109 | -0.003 | 0.002  | -0.000 | $\langle 1074   R^1, b^0, s_{\text{sym}}^0, s_{\text{asym}}^1, t^0, s_X^0 \rangle$ | 15.74% | 0.001  | 0.004  | 0.000  |
|        |       |        |        |        | $\langle 1074   R^2, b^1, s_{\text{sym}}^0, s_{\text{asym}}^0, t^0, s_X^0 \rangle$ | 9.19%  | 0.000  | 0.000  | 0.000  |
|        |       |        |        |        | $\langle 1074   R^1, b^0, s_{\text{sym}}^1, s_{\text{asym}}^0, t^2, s_X^0 \rangle$ | 7.77%  | 0.000  | 0.000  | 0.000  |
|        |       |        |        |        | $\langle 1074   R^0, b^0, s_{\text{sym}}^1, s_{\text{asym}}^0, t^0, s_X^0 \rangle$ | 0.02%  | 0.000  | -0.005 | 0.000  |
|        |       |        |        |        | $\langle 1074   R^1, b^0, s_{\text{sym}}^0, s_{\text{asym}}^0, t^0, s_X^0 \rangle$ | 0.01%  | -0.002 | 0.000  | 0.000  |
| 4283.1 | 0.122 | 0.000  | -0.000 | 0.003  | $\langle 1122   R^1, b^0, s_{\text{sym}}^1, s_{\text{asym}}^0, t^0, s_X^0 \rangle$ | 19.99% | 0.000  | 0.000  | -0.006 |
|        |       |        |        |        | $\langle 1122   R^0, b^1, s_{\text{sym}}^0, s_{\text{asym}}^1, t^0, s_X^0 \rangle$ | 1.47%  | 0.000  | 0.000  | 0.004  |
|        |       |        |        |        | $\langle 1122   R^0, b^0, s_{\text{sym}}^0, s_{\text{asym}}^1, t^0, s_X^0 \rangle$ | 0.01%  | 0.000  | 0.000  | 0.006  |
| 4296.5 | 0.127 | 0.000  | 0.000  | 0.003  | $\langle 1134   R^0, b^1, s_{\text{sym}}^0, s_{\text{asym}}^1, t^0, s_X^0 \rangle$ | 5.20%  | 0.000  | 0.000  | 0.008  |
|        |       |        |        |        | $\langle 1134   R^1, b^2, s_{\text{sym}}^0, s_{\text{asym}}^0, t^0, s_X^0 \rangle$ | 5.16%  | 0.000  | 0.000  | 0.000  |
|        |       |        |        |        | $\langle 1134   R^0, b^0, s_{\text{sym}}^0, s_{\text{asym}}^1, t^0, s_X^0 \rangle$ | 0.01%  | 0.000  | 0.000  | -0.006 |
|        |       |        |        |        | $\langle 1134   R^0, b^0, s_{\text{sym}}^1, s_{\text{asym}}^1, t^0, s_X^0 \rangle$ | 0.01%  | 0.000  | 0.000  | -0.001 |
| 4299.9 | 0.155 | 0.000  | 0.000  | -0.004 | $\langle 1138   R^1, b^2, s_{\text{sym}}^0, s_{\text{asym}}^0, t^0, s_X^0 \rangle$ | 36.52% | 0.000  | 0.000  | 0.001  |
|        |       |        |        |        | $\langle 1138   R^0, b^1, s_{\text{sym}}^0, s_{\text{asym}}^1, t^0, s_X^0 \rangle$ | 16.49% | 0.000  | 0.000  | -0.014 |
|        |       |        |        |        | $\langle 1138   R^1, b^0, s_{\text{sym}}^1, s_{\text{asym}}^0, t^0, s_X^0 \rangle$ | 2.53%  | 0.000  | 0.000  | -0.002 |
|        |       |        |        |        | $\langle 1138   R^0, b^0, s_{\text{sym}}^0, s_{\text{asym}}^1, t^0, s_X^0 \rangle$ | 0.04%  | 0.000  | 0.000  | 0.011  |
| 4412.1 | 0.140 | -0.000 | 0.004  | 0.000  | $\langle 1231   R^0, b^0, s_{\text{sym}}^0, s_{\text{asym}}^0, t^0, s_X^2 \rangle$ | 96.35% | 0.000  | 0.004  | 0.000  |
|        |       |        |        |        | $\langle 1231   R^0, b^0, s_{\text{sym}}^0, s_{\text{asym}}^0, t^1, s_X^0 \rangle$ | 0.00%  | 0.000  | 0.000  | 0.000  |
| 4412.5 | 0.446 | -0.000 | 0.000  | 0.006  | $\langle 1234   R^0, b^0, s_{\text{sym}}^0, s_{\text{asym}}^0, t^0, s_X^2 \rangle$ | 96.23% | 0.000  | 0.000  | 0.006  |
|        |       |        |        |        | $\langle 1234   R^0, b^0, s_{\text{sym}}^0, s_{\text{asym}}^0, t^1, s_X^0 \rangle$ | 0.00%  | 0.000  | 0.000  | 0.000  |
| 4450.4 | 0.080 | -0.000 | 0.000  | 0.003  | $\langle 1258   R^1, b^2, s_{\text{sym}}^0, s_{\text{asym}}^0, t^1, s_X^0 \rangle$ | 21.31% | 0.000  | 0.000  | 0.000  |
|        |       |        |        |        | $\langle 1258   R^0, b^1, s_{\text{sym}}^0, s_{\text{asym}}^1, t^1, s_X^0 \rangle$ | 20.49% | 0.000  | 0.000  | 0.004  |
|        |       |        |        |        | $\langle 1258   R^0, b^1, s_{\text{sym}}^0, s_{\text{asym}}^1, t^0, s_X^0 \rangle$ | 2.34%  | 0.000  | 0.000  | 0.005  |
|        |       |        |        |        | $\langle 1258   R^0, b^0, s_{\text{sym}}^0, s_{\text{asym}}^1, t^0, s_X^0 \rangle$ | 0.02%  | 0.000  | 0.000  | -0.007 |
| 4450.4 | 0.077 | -0.002 | 0.002  | -0.000 | $\langle 1259   R^2, b^1, s_{\text{sym}}^0, s_{\text{asym}}^0, t^4, s_X^0 \rangle$ | 6.01%  | 0.000  | 0.000  | 0.000  |
|        |       |        |        |        | $\langle 1259   R^1, b^0, s_{\text{sym}}^0, s_{\text{asym}}^1, t^0, s_X^0 \rangle$ | 5.46%  | 0.000  | 0.003  | 0.000  |
|        |       |        |        |        | $\langle 1259   R^1, b^0, s_{\text{sym}}^0, s_{\text{asym}}^0, t^0, s_X^0 \rangle$ | 0.00%  | -0.001 | 0.000  | 0.000  |
| 4460.2 | 0.051 | -0.000 | 0.000  | 0.002  | $\langle 1265   R^1, b^0, s_{\text{sym}}^1, s_{\text{asym}}^0, t^1, s_X^0 \rangle$ | 23.16% | 0.000  | 0.000  | 0.000  |
|        |       |        |        |        | $\langle 1265   R^0, b^1, s_{\text{sym}}^0, s_{\text{asym}}^1, t^0, s_X^0 \rangle$ | 1.85%  | 0.000  | 0.000  | 0.005  |
|        |       |        |        |        | $\langle 1265   R^1, b^0, s_{\text{sym}}^1, s_{\text{asym}}^0, t^0, s_X^0 \rangle$ | 1.11%  | 0.000  | 0.000  | -0.001 |
|        |       |        |        |        | $\langle 1265   R^0, b^0, s_{\text{sym}}^0, s_{\text{asym}}^1, t^0, s_X^0 \rangle$ | 0.00%  | 0.000  | 0.000  | -0.003 |
| 4490.1 | 0.316 | -0.000 | 0.000  | -0.005 | $\langle 1288   R^0, b^1, s_{\text{sym}}^0, s_{\text{asym}}^1, t^0, s_X^0 \rangle$ | 12.56% | 0.000  | 0.000  | -0.012 |
|        |       |        |        |        | $\langle 1288   R^1, b^2, s_{\text{sym}}^0, s_{\text{asym}}^0, t^0, s_X^0 \rangle$ | 12.07% | 0.000  | 0.000  | 0.000  |
|        |       |        |        |        | $\langle 1288   R^2, b^0, s_{\text{sym}}^0, s_{\text{asym}}^1, t^0, s_X^0 \rangle$ | 0.15%  | 0.000  | 0.000  | -0.001 |
|        |       |        |        |        | $\langle 1288   R^0, b^0, s_{\text{sym}}^0, s_{\text{asym}}^1, t^0, s_X^0 \rangle$ | 0.02%  | 0.000  | 0.000  | 0.009  |
| 4491.2 | 0.239 | 0.000  | 0.000  | -0.005 | $\langle 1290   R^2, b^1, s_{\text{sym}}^0, s_{\text{asym}}^0, t^4, s_X^0 \rangle$ | 11.04% | 0.000  | 0.000  | 0.000  |

|        |       |        |        |        |                                                                                  |        |        |        |        |
|--------|-------|--------|--------|--------|----------------------------------------------------------------------------------|--------|--------|--------|--------|
|        |       |        |        |        | $\langle 1290 R^0, b^1, s_{\text{sym}}^0, s_{\text{asym}}^1, t^0, s_X^0 \rangle$ | 9.62%  | 0.000  | 0.000  | -0.011 |
|        |       |        |        |        | $\langle 1290 R^1, b^2, s_{\text{sym}}^0, s_{\text{asym}}^0, t^0, s_X^0 \rangle$ | 9.24%  | 0.000  | 0.000  | 0.000  |
|        |       |        |        |        | $\langle 1290 R^2, b^0, s_{\text{sym}}^0, s_{\text{asym}}^1, t^0, s_X^0 \rangle$ | 0.12%  | 0.000  | 0.000  | -0.001 |
|        |       |        |        |        | $\langle 1290 R^0, b^0, s_{\text{sym}}^0, s_{\text{asym}}^1, t^0, s_X^0 \rangle$ | 0.02%  | 0.000  | 0.000  | 0.008  |
| 4498.4 | 0.073 | 0.000  | -0.000 | -0.003 | $\langle 1295 R^2, b^1, s_{\text{sym}}^0, s_{\text{asym}}^0, t^3, s_X^0 \rangle$ | 14.64% | 0.000  | 0.000  | 0.000  |
|        |       |        |        |        | $\langle 1295 R^1, b^0, s_{\text{sym}}^0, s_{\text{asym}}^1, t^3, s_X^0 \rangle$ | 11.78% | 0.000  | 0.000  | 0.000  |
|        |       |        |        |        | $\langle 1295 R^0, b^1, s_{\text{sym}}^0, s_{\text{asym}}^1, t^0, s_X^0 \rangle$ | 2.85%  | 0.000  | 0.000  | -0.006 |
|        |       |        |        |        | $\langle 1295 R^2, b^0, s_{\text{sym}}^0, s_{\text{asym}}^1, t^0, s_X^0 \rangle$ | 0.04%  | 0.000  | 0.000  | -0.001 |
|        |       |        |        |        | $\langle 1295 R^0, b^0, s_{\text{sym}}^0, s_{\text{asym}}^1, t^0, s_X^0 \rangle$ | 0.01%  | 0.000  | 0.000  | 0.005  |
| 4524.2 | 0.057 | -0.000 | -0.000 | 0.002  | $\langle 1324 R^2, b^1, s_{\text{sym}}^0, s_{\text{asym}}^0, t^1, s_X^0 \rangle$ | 29.98% | 0.000  | 0.000  | 0.000  |
|        |       |        |        |        | $\langle 1324 R^0, b^1, s_{\text{sym}}^0, s_{\text{asym}}^1, t^0, s_X^0 \rangle$ | 1.88%  | 0.000  | 0.000  | 0.005  |
|        |       |        |        |        | $\langle 1324 R^1, b^0, s_{\text{sym}}^1, s_{\text{asym}}^0, t^0, s_X^0 \rangle$ | 0.46%  | 0.000  | 0.000  | 0.001  |
|        |       |        |        |        | $\langle 1324 R^0, b^0, s_{\text{sym}}^0, s_{\text{asym}}^1, t^0, s_X^0 \rangle$ | 0.00%  | 0.000  | 0.000  | -0.004 |
| 4538.6 | 0.061 | -0.001 | 0.002  | -0.000 | $\langle 1331 R^1, b^2, s_{\text{sym}}^0, s_{\text{asym}}^0, t^2, s_X^0 \rangle$ | 41.90% | 0.000  | 0.000  | 0.000  |
|        |       |        |        |        | $\langle 1331 R^0, b^1, s_{\text{sym}}^1, s_{\text{asym}}^0, t^0, s_X^0 \rangle$ | 8.66%  | 0.000  | -0.004 | 0.000  |
|        |       |        |        |        | $\langle 1331 R^0, b^0, s_{\text{sym}}^1, s_{\text{asym}}^0, t^0, s_X^0 \rangle$ | 0.03%  | -0.001 | 0.006  | 0.000  |
|        |       |        |        |        | $\langle 1331 R^0, b^1, s_{\text{sym}}^0, s_{\text{asym}}^0, t^0, s_X^0 \rangle$ | 0.02%  | 0.000  | -0.001 | 0.000  |
| 4546.3 | 0.074 | -0.001 | 0.002  | 0.000  | $\langle 1338 R^0, b^1, s_{\text{sym}}^1, s_{\text{asym}}^0, t^0, s_X^0 \rangle$ | 6.49%  | 0.000  | -0.003 | 0.000  |
|        |       |        |        |        | $\langle 1338 R^0, b^0, s_{\text{sym}}^1, s_{\text{asym}}^0, t^0, s_X^0 \rangle$ | 0.02%  | -0.001 | 0.006  | 0.000  |
|        |       |        |        |        | $\langle 1338 R^1, b^0, s_{\text{sym}}^0, s_{\text{asym}}^0, t^0, s_X^0 \rangle$ | 0.00%  | -0.001 | 0.000  | 0.000  |
| 4547.5 | 0.092 | 0.001  | -0.003 | -0.000 | $\langle 1340 R^1, b^2, s_{\text{sym}}^0, s_{\text{asym}}^0, t^2, s_X^0 \rangle$ | 19.89% | 0.000  | 0.000  | 0.000  |
|        |       |        |        |        | $\langle 1340 R^0, b^1, s_{\text{sym}}^1, s_{\text{asym}}^0, t^0, s_X^0 \rangle$ | 17.78% | 0.000  | 0.005  | 0.000  |
|        |       |        |        |        | $\langle 1340 R^0, b^0, s_{\text{sym}}^1, s_{\text{asym}}^0, t^0, s_X^0 \rangle$ | 0.06%  | 0.001  | -0.009 | 0.000  |
|        |       |        |        |        | $\langle 1340 R^0, b^1, s_{\text{sym}}^0, s_{\text{asym}}^0, t^0, s_X^0 \rangle$ | 0.04%  | 0.000  | 0.002  | 0.000  |
| 4675.9 | 0.086 | -0.000 | -0.000 | 0.003  | $\langle 1468 R^1, b^2, s_{\text{sym}}^0, s_{\text{asym}}^0, t^2, s_X^0 \rangle$ | 28.06% | 0.000  | 0.000  | 0.000  |
|        |       |        |        |        | $\langle 1468 R^1, b^2, s_{\text{sym}}^0, s_{\text{asym}}^0, t^0, s_X^0 \rangle$ | 7.27%  | 0.000  | 0.000  | 0.000  |
|        |       |        |        |        | $\langle 1468 R^0, b^1, s_{\text{sym}}^0, s_{\text{asym}}^1, t^1, s_X^0 \rangle$ | 4.92%  | 0.000  | 0.000  | -0.001 |
|        |       |        |        |        | $\langle 1468 R^0, b^1, s_{\text{sym}}^0, s_{\text{asym}}^1, t^0, s_X^0 \rangle$ | 2.82%  | 0.000  | 0.000  | 0.006  |
|        |       |        |        |        | $\langle 1468 R^0, b^0, s_{\text{sym}}^0, s_{\text{asym}}^1, t^0, s_X^0 \rangle$ | 0.00%  | 0.000  | 0.000  | -0.002 |
| 4701.6 | 0.149 | 0.000  | -0.000 | -0.004 | $\langle 1491 R^3, b^1, s_{\text{sym}}^0, s_{\text{asym}}^0, t^1, s_X^0 \rangle$ | 43.58% | 0.000  | 0.000  | 0.000  |
|        |       |        |        |        | $\langle 1491 R^0, b^1, s_{\text{sym}}^0, s_{\text{asym}}^1, t^0, s_X^0 \rangle$ | 4.13%  | 0.000  | 0.000  | -0.007 |
|        |       |        |        |        | $\langle 1491 R^2, b^0, s_{\text{sym}}^0, s_{\text{asym}}^1, t^0, s_X^0 \rangle$ | 2.09%  | 0.000  | 0.000  | 0.004  |
|        |       |        |        |        | $\langle 1491 R^0, b^0, s_{\text{sym}}^1, s_{\text{asym}}^1, t^0, s_X^0 \rangle$ | 0.08%  | 0.000  | 0.000  | -0.004 |
| 4711.3 | 0.055 | 0.000  | 0.000  | 0.002  | $\langle 1508 R^2, b^1, s_{\text{sym}}^0, s_{\text{asym}}^0, t^2, s_X^0 \rangle$ | 4.99%  | 0.000  | 0.000  | 0.000  |
|        |       |        |        |        | $\langle 1508 R^2, b^0, s_{\text{sym}}^0, s_{\text{asym}}^1, t^0, s_X^0 \rangle$ | 2.09%  | 0.000  | 0.000  | 0.004  |
|        |       |        |        |        | $\langle 1508 R^0, b^1, s_{\text{sym}}^0, s_{\text{asym}}^1, t^0, s_X^0 \rangle$ | 1.29%  | 0.000  | 0.000  | 0.004  |
|        |       |        |        |        | $\langle 1508 R^0, b^0, s_{\text{sym}}^0, s_{\text{asym}}^1, t^0, s_X^0 \rangle$ | 0.00%  | 0.000  | 0.000  | -0.004 |
| 4718.9 | 0.158 | -0.000 | -0.000 | -0.004 | $\langle 1516 R^2, b^0, s_{\text{sym}}^0, s_{\text{asym}}^1, t^0, s_X^0 \rangle$ | 8.00%  | 0.000  | 0.000  | -0.008 |
|        |       |        |        |        | $\langle 1516 R^1, b^2, s_{\text{sym}}^0, s_{\text{asym}}^0, t^0, s_X^0 \rangle$ | 5.39%  | 0.000  | 0.000  | 0.000  |
|        |       |        |        |        | $\langle 1516 R^0, b^1, s_{\text{sym}}^0, s_{\text{asym}}^1, t^0, s_X^0 \rangle$ | 3.44%  | 0.000  | 0.000  | -0.007 |
|        |       |        |        |        | $\langle 1516 R^0, b^0, s_{\text{sym}}^1, s_{\text{asym}}^1, t^0, s_X^0 \rangle$ | 0.39%  | 0.000  | 0.000  | 0.008  |
| 4727.6 | 0.094 | -0.000 | -0.000 | -0.003 | $\langle 1529 R^2, b^0, s_{\text{sym}}^0, s_{\text{asym}}^1, t^0, s_X^0 \rangle$ | 17.24% | 0.000  | 0.000  | 0.011  |

|        |       |        |        |        |                                                                                    |        |        |        |        |
|--------|-------|--------|--------|--------|------------------------------------------------------------------------------------|--------|--------|--------|--------|
|        |       |        |        |        | $\langle 1529   R^1, b^2, s_{\text{sym}}^0, s_{\text{asym}}^0, t^3, s_X^0 \rangle$ | 11.68% | 0.000  | 0.000  | 0.000  |
|        |       |        |        |        | $\langle 1529   R^3, b^1, s_{\text{sym}}^0, s_{\text{asym}}^0, t^0, s_X^0 \rangle$ | 11.03% | 0.000  | 0.000  | 0.000  |
|        |       |        |        |        | $\langle 1529   R^0, b^1, s_{\text{sym}}^0, s_{\text{asym}}^1, t^0, s_X^0 \rangle$ | 2.66%  | 0.000  | 0.000  | -0.006 |
|        |       |        |        |        | $\langle 1529   R^0, b^0, s_{\text{sym}}^1, s_{\text{asym}}^1, t^0, s_X^0 \rangle$ | 0.78%  | 0.000  | 0.000  | -0.012 |
| 4736.1 | 0.065 | 0.000  | 0.000  | 0.002  | $\langle 1537   R^1, b^2, s_{\text{sym}}^0, s_{\text{asym}}^0, t^3, s_X^0 \rangle$ | 56.72% | 0.000  | 0.000  | 0.000  |
|        |       |        |        |        | $\langle 1537   R^0, b^1, s_{\text{sym}}^0, s_{\text{asym}}^1, t^0, s_X^0 \rangle$ | 1.49%  | 0.000  | 0.000  | 0.004  |
|        |       |        |        |        | $\langle 1537   R^2, b^0, s_{\text{sym}}^0, s_{\text{asym}}^1, t^0, s_X^0 \rangle$ | 1.25%  | 0.000  | 0.000  | -0.003 |
|        |       |        |        |        | $\langle 1537   R^0, b^0, s_{\text{sym}}^1, s_{\text{asym}}^1, t^0, s_X^0 \rangle$ | 0.05%  | 0.000  | 0.000  | 0.003  |
| 4915.9 | 0.085 | -0.001 | 0.002  | 0.000  | $\langle 1742   R^3, b^1, s_{\text{sym}}^0, s_{\text{asym}}^0, t^0, s_X^0 \rangle$ | 26.20% | 0.000  | 0.000  | 0.000  |
|        |       |        |        |        | $\langle 1742   R^2, b^0, s_{\text{sym}}^0, s_{\text{asym}}^1, t^0, s_X^0 \rangle$ | 16.19% | 0.001  | 0.001  | 0.000  |
|        |       |        |        |        | $\langle 1742   R^0, b^0, s_{\text{sym}}^0, s_{\text{asym}}^2, t^0, s_X^0 \rangle$ | 0.75%  | 0.000  | -0.005 | 0.000  |
|        |       |        |        |        | $\langle 1742   R^0, b^0, s_{\text{sym}}^1, s_{\text{asym}}^0, t^0, s_X^0 \rangle$ | 0.03%  | -0.001 | 0.007  | 0.000  |
|        |       |        |        |        | $\langle 1742   R^1, b^0, s_{\text{sym}}^0, s_{\text{asym}}^0, t^0, s_X^0 \rangle$ | 0.01%  | -0.002 | 0.000  | 0.000  |
| 4916.2 | 0.144 | -0.000 | 0.000  | 0.003  | $\langle 1743   R^1, b^1, s_{\text{sym}}^0, s_{\text{asym}}^0, t^0, s_X^1 \rangle$ | 73.66% | 0.000  | 0.000  | 0.000  |
|        |       |        |        |        | $\langle 1743   R^0, b^0, s_{\text{sym}}^0, s_{\text{asym}}^1, t^0, s_X^1 \rangle$ | 15.15% | 0.000  | 0.000  | 0.004  |
|        |       |        |        |        | $\langle 1743   R^0, b^0, s_{\text{sym}}^0, s_{\text{asym}}^1, t^0, s_X^0 \rangle$ | 0.00%  | 0.000  | 0.000  | 0.001  |
| 5030.3 | 0.052 | 0.000  | -0.000 | 0.002  | $\langle 1895   R^2, b^0, s_{\text{sym}}^1, s_{\text{asym}}^0, t^1, s_X^0 \rangle$ | 19.82% | 0.000  | 0.000  | -0.004 |
|        |       |        |        |        | $\langle 1895   R^3, b^1, s_{\text{sym}}^0, s_{\text{asym}}^0, t^2, s_X^0 \rangle$ | 15.15% | 0.000  | 0.000  | 0.000  |
|        |       |        |        |        | $\langle 1895   R^2, b^0, s_{\text{sym}}^0, s_{\text{asym}}^1, t^0, s_X^0 \rangle$ | 1.01%  | 0.000  | 0.000  | -0.003 |
|        |       |        |        |        | $\langle 1895   R^0, b^0, s_{\text{sym}}^0, s_{\text{asym}}^1, t^0, s_X^0 \rangle$ | 0.02%  | 0.000  | 0.000  | 0.009  |
|        |       |        |        |        | $\langle 1895   R^0, b^0, s_{\text{sym}}^0, s_{\text{asym}}^0, t^1, s_X^0 \rangle$ | 0.01%  | 0.000  | 0.001  | 0.002  |
| 5058.3 | 0.089 | 0.000  | -0.000 | -0.003 | $\langle 1940   R^2, b^0, s_{\text{sym}}^0, s_{\text{asym}}^0, t^1, s_X^1 \rangle$ | 23.08% | 0.000  | 0.000  | 0.000  |
|        |       |        |        |        | $\langle 1940   R^2, b^0, s_{\text{sym}}^0, s_{\text{asym}}^1, t^0, s_X^0 \rangle$ | 0.38%  | 0.000  | 0.000  | -0.001 |
|        |       |        |        |        | $\langle 1940   R^0, b^0, s_{\text{sym}}^1, s_{\text{asym}}^1, t^0, s_X^0 \rangle$ | 0.06%  | 0.000  | 0.000  | 0.003  |
|        |       |        |        |        | $\langle 1940   R^0, b^0, s_{\text{sym}}^0, s_{\text{asym}}^1, t^0, s_X^0 \rangle$ | 0.00%  | 0.000  | 0.000  | -0.002 |
| 5064.2 | 0.080 | -0.000 | 0.000  | 0.003  | $\langle 1949   R^1, b^1, s_{\text{sym}}^0, s_{\text{asym}}^0, t^1, s_X^1 \rangle$ | 25.24% | 0.000  | 0.000  | 0.000  |
|        |       |        |        |        | $\langle 1949   R^0, b^0, s_{\text{sym}}^0, s_{\text{asym}}^1, t^0, s_X^1 \rangle$ | 2.61%  | 0.000  | 0.000  | 0.001  |
|        |       |        |        |        | $\langle 1949   R^0, b^0, s_{\text{sym}}^1, s_{\text{asym}}^1, t^0, s_X^0 \rangle$ | 0.01%  | 0.000  | 0.000  | -0.001 |
|        |       |        |        |        | $\langle 1949   R^0, b^0, s_{\text{sym}}^0, s_{\text{asym}}^1, t^0, s_X^0 \rangle$ | 0.00%  | 0.000  | 0.000  | 0.001  |
| 5079.0 | 0.177 | -0.000 | 0.000  | 0.004  | $\langle 1968   R^3, b^1, s_{\text{sym}}^0, s_{\text{asym}}^0, t^0, s_X^0 \rangle$ | 45.24% | 0.000  | 0.000  | 0.000  |
|        |       |        |        |        | $\langle 1968   R^2, b^0, s_{\text{sym}}^0, s_{\text{asym}}^1, t^0, s_X^0 \rangle$ | 23.90% | 0.000  | 0.000  | 0.016  |
|        |       |        |        |        | $\langle 1968   R^0, b^0, s_{\text{sym}}^1, s_{\text{asym}}^1, t^0, s_X^0 \rangle$ | 1.37%  | 0.000  | 0.000  | -0.016 |
| 5092.7 | 0.284 | -0.000 | 0.000  | 0.005  | $\langle 1986   R^0, b^0, s_{\text{sym}}^0, s_{\text{asym}}^1, t^0, s_X^1 \rangle$ | 34.38% | 0.000  | 0.000  | 0.006  |
|        |       |        |        |        | $\langle 1986   R^1, b^1, s_{\text{sym}}^0, s_{\text{asym}}^0, t^0, s_X^1 \rangle$ | 19.20% | 0.000  | 0.000  | 0.000  |
|        |       |        |        |        | $\langle 1986   R^0, b^0, s_{\text{sym}}^0, s_{\text{asym}}^1, t^0, s_X^0 \rangle$ | 0.00%  | 0.000  | 0.000  | 0.001  |
| 5092.9 | 0.108 | 0.000  | -0.003 | -0.000 | $\langle 1987   R^0, b^0, s_{\text{sym}}^0, s_{\text{asym}}^1, t^0, s_X^1 \rangle$ | 36.06% | 0.000  | -0.002 | 0.000  |
|        |       |        |        |        | $\langle 1987   R^1, b^1, s_{\text{sym}}^0, s_{\text{asym}}^0, t^0, s_X^1 \rangle$ | 20.25% | 0.000  | 0.000  | 0.000  |
|        |       |        |        |        | $\langle 1987   R^0, b^0, s_{\text{sym}}^1, s_{\text{asym}}^0, t^0, s_X^0 \rangle$ | 0.00%  | 0.000  | -0.001 | 0.000  |
| 5138.7 | 0.064 | -0.001 | 0.002  | -0.000 | $\langle 2038   R^2, b^0, s_{\text{sym}}^1, s_{\text{asym}}^0, t^0, s_X^0 \rangle$ | 20.03% | 0.000  | 0.007  | 0.000  |
|        |       |        |        |        | $\langle 2038   R^4, b^0, s_{\text{sym}}^0, s_{\text{asym}}^0, t^0, s_X^0 \rangle$ | 9.33%  | 0.000  | 0.000  | 0.000  |
|        |       |        |        |        | $\langle 2038   R^3, b^1, s_{\text{sym}}^0, s_{\text{asym}}^0, t^2, s_X^0 \rangle$ | 5.06%  | 0.000  | 0.000  | 0.000  |

|        |       |        |        |        |                                                                                    |        |        |        |        |
|--------|-------|--------|--------|--------|------------------------------------------------------------------------------------|--------|--------|--------|--------|
|        |       |        |        |        | $\langle 2038   R^0, b^0, s_{\text{sym}}^1, s_{\text{asym}}^0, t^0, s_X^0 \rangle$ | 0.01%  | 0.000  | -0.003 | 0.000  |
| 5143.0 | 0.143 | 0.001  | -0.003 | 0.000  | $\langle 2042   R^0, b^0, s_{\text{sym}}^1, s_{\text{asym}}^0, t^0, s_X^1 \rangle$ | 16.12% | 0.000  | 0.000  | 0.000  |
|        |       |        |        |        | $\langle 2042   R^2, b^0, s_{\text{sym}}^0, s_{\text{asym}}^1, t^0, s_X^0 \rangle$ | 12.94% | 0.000  | -0.001 | 0.000  |
|        |       |        |        |        | $\langle 2042   R^3, b^1, s_{\text{sym}}^0, s_{\text{asym}}^0, t^0, s_X^0 \rangle$ | 8.64%  | 0.000  | 0.000  | 0.000  |
|        |       |        |        |        | $\langle 2042   R^2, b^0, s_{\text{sym}}^1, s_{\text{asym}}^0, t^0, s_X^0 \rangle$ | 1.84%  | 0.000  | 0.003  | 0.000  |
|        |       |        |        |        | $\langle 2042   R^0, b^0, s_{\text{sym}}^0, s_{\text{asym}}^2, t^0, s_X^0 \rangle$ | 0.56%  | 0.000  | 0.004  | 0.000  |
|        |       |        |        |        | $\langle 2042   R^0, b^0, s_{\text{sym}}^1, s_{\text{asym}}^0, t^0, s_X^0 \rangle$ | 0.08%  | 0.001  | -0.011 | 0.000  |
| 5143.6 | 0.261 | 0.000  | -0.000 | 0.005  | $\langle 2043   R^0, b^0, s_{\text{sym}}^1, s_{\text{asym}}^0, t^0, s_X^1 \rangle$ | 32.38% | 0.000  | 0.000  | 0.000  |
|        |       |        |        |        | $\langle 2043   R^1, b^1, s_{\text{sym}}^0, s_{\text{asym}}^0, t^2, s_X^1 \rangle$ | 15.40% | 0.000  | 0.000  | 0.000  |
|        |       |        |        |        | $\langle 2043   R^0, b^0, s_{\text{sym}}^0, s_{\text{asym}}^0, t^0, s_X^1 \rangle$ | 0.16%  | 0.000  | 0.000  | 0.006  |
|        |       |        |        |        | $\langle 2043   R^0, b^0, s_{\text{sym}}^0, s_{\text{asym}}^1, t^0, s_X^0 \rangle$ | 0.00%  | 0.000  | 0.000  | 0.003  |
| 5144.9 | 0.055 | 0.000  | 0.000  | 0.002  | $\langle 2047   R^1, b^1, s_{\text{sym}}^0, s_{\text{asym}}^0, t^2, s_X^1 \rangle$ | 69.64% | 0.000  | 0.000  | 0.000  |
|        |       |        |        |        | $\langle 2047   R^0, b^0, s_{\text{sym}}^0, s_{\text{asym}}^0, t^0, s_X^1 \rangle$ | 0.04%  | 0.000  | 0.000  | 0.002  |
|        |       |        |        |        | $\langle 2047   R^0, b^0, s_{\text{sym}}^0, s_{\text{asym}}^1, t^0, s_X^0 \rangle$ | 0.00%  | 0.000  | 0.000  | 0.001  |
| 5249.5 | 0.076 | -0.000 | -0.000 | 0.002  | $\langle 2201   R^1, b^1, s_{\text{sym}}^0, s_{\text{asym}}^0, t^0, s_X^1 \rangle$ | 37.20% | 0.000  | 0.000  | 0.000  |
|        |       |        |        |        | $\langle 2201   R^0, b^0, s_{\text{sym}}^0, s_{\text{asym}}^1, t^0, s_X^1 \rangle$ | 2.85%  | 0.000  | 0.000  | 0.001  |
|        |       |        |        |        | $\langle 2201   R^0, b^0, s_{\text{sym}}^1, s_{\text{asym}}^1, t^0, s_X^0 \rangle$ | 0.01%  | 0.000  | 0.000  | -0.001 |
|        |       |        |        |        | $\langle 2201   R^0, b^0, s_{\text{sym}}^0, s_{\text{asym}}^1, t^0, s_X^0 \rangle$ | 0.00%  | 0.000  | 0.000  | 0.001  |
| 5262.0 | 0.144 | -0.000 | 0.000  | 0.003  | $\langle 2219   R^2, b^0, s_{\text{sym}}^1, s_{\text{asym}}^0, t^0, s_X^0 \rangle$ | 21.27% | 0.000  | 0.000  | 0.001  |
|        |       |        |        |        | $\langle 2219   R^2, b^0, s_{\text{sym}}^0, s_{\text{asym}}^2, t^0, s_X^0 \rangle$ | 0.70%  | 0.000  | 0.000  | -0.002 |
|        |       |        |        |        | $\langle 2219   R^0, b^0, s_{\text{sym}}^1, s_{\text{asym}}^1, t^0, s_X^0 \rangle$ | 0.65%  | 0.000  | 0.000  | -0.011 |
|        |       |        |        |        | $\langle 2219   R^0, b^0, s_{\text{sym}}^0, s_{\text{asym}}^1, t^0, s_X^0 \rangle$ | 0.14%  | 0.000  | 0.000  | 0.021  |
| 5263.6 | 0.099 | 0.000  | -0.000 | 0.003  | $\langle 2222   R^3, b^1, s_{\text{sym}}^0, s_{\text{asym}}^0, t^3, s_X^0 \rangle$ | 24.28% | 0.000  | 0.000  | 0.000  |
|        |       |        |        |        | $\langle 2222   R^0, b^0, s_{\text{sym}}^1, s_{\text{asym}}^1, t^0, s_X^0 \rangle$ | 0.34%  | 0.000  | 0.000  | -0.008 |
|        |       |        |        |        | $\langle 2222   R^0, b^0, s_{\text{sym}}^1, s_{\text{asym}}^1, t^1, s_X^0 \rangle$ | 0.20%  | 0.000  | -0.001 | -0.001 |
|        |       |        |        |        | $\langle 2222   R^0, b^0, s_{\text{sym}}^0, s_{\text{asym}}^1, t^0, s_X^0 \rangle$ | 0.08%  | 0.000  | 0.000  | 0.016  |
| 5269.8 | 0.067 | 0.000  | 0.000  | 0.002  | $\langle 2233   R^3, b^1, s_{\text{sym}}^0, s_{\text{asym}}^0, t^2, s_X^0 \rangle$ | 3.92%  | 0.000  | 0.000  | 0.000  |
|        |       |        |        |        | $\langle 2233   R^0, b^0, s_{\text{sym}}^1, s_{\text{asym}}^1, t^1, s_X^0 \rangle$ | 0.23%  | 0.000  | -0.001 | -0.001 |
|        |       |        |        |        | $\langle 2233   R^0, b^0, s_{\text{sym}}^1, s_{\text{asym}}^1, t^0, s_X^0 \rangle$ | 0.22%  | 0.000  | 0.000  | -0.006 |
|        |       |        |        |        | $\langle 2233   R^0, b^0, s_{\text{sym}}^0, s_{\text{asym}}^1, t^0, s_X^0 \rangle$ | 0.04%  | 0.000  | 0.000  | 0.012  |
| 5290.1 | 0.053 | -0.000 | 0.000  | -0.002 | $\langle 2261   R^2, b^0, s_{\text{sym}}^0, s_{\text{asym}}^1, t^0, s_X^0 \rangle$ | 30.40% | 0.000  | 0.000  | -0.002 |
|        |       |        |        |        | $\langle 2261   R^3, b^1, s_{\text{sym}}^0, s_{\text{asym}}^0, t^0, s_X^0 \rangle$ | 17.60% | 0.000  | 0.000  | 0.000  |
|        |       |        |        |        | $\langle 2261   R^0, b^0, s_{\text{sym}}^1, s_{\text{asym}}^1, t^0, s_X^0 \rangle$ | 0.29%  | 0.000  | 0.000  | 0.007  |
|        |       |        |        |        | $\langle 2261   R^0, b^0, s_{\text{sym}}^0, s_{\text{asym}}^1, t^0, s_X^0 \rangle$ | 0.03%  | 0.000  | 0.000  | -0.010 |
| 5301.6 | 0.958 | -0.000 | 0.000  | -0.008 | $\langle 2271   R^3, b^1, s_{\text{sym}}^0, s_{\text{asym}}^0, t^0, s_X^0 \rangle$ | 20.74% | 0.000  | 0.000  | 0.000  |
|        |       |        |        |        | $\langle 2271   R^2, b^0, s_{\text{sym}}^0, s_{\text{asym}}^1, t^0, s_X^0 \rangle$ | 9.53%  | 0.000  | 0.000  | -0.005 |
|        |       |        |        |        | $\langle 2271   R^0, b^0, s_{\text{sym}}^1, s_{\text{asym}}^1, t^0, s_X^0 \rangle$ | 4.00%  | 0.000  | 0.000  | 0.027  |
|        |       |        |        |        | $\langle 2271   R^0, b^0, s_{\text{sym}}^0, s_{\text{asym}}^1, t^0, s_X^0 \rangle$ | 0.53%  | 0.000  | 0.000  | -0.042 |
| 5302.0 | 0.229 | 0.001  | -0.004 | -0.000 | $\langle 2272   R^2, b^0, s_{\text{sym}}^0, s_{\text{asym}}^1, t^1, s_X^0 \rangle$ | 10.67% | 0.000  | 0.000  | 0.000  |
|        |       |        |        |        | $\langle 2272   R^0, b^0, s_{\text{sym}}^0, s_{\text{asym}}^2, t^0, s_X^0 \rangle$ | 1.78%  | -0.001 | 0.007  | 0.000  |
|        |       |        |        |        | $\langle 2272   R^0, b^0, s_{\text{sym}}^1, s_{\text{asym}}^2, t^0, s_X^0 \rangle$ | 0.82%  | 0.000  | 0.003  | 0.000  |

|        |       |        |        |        |                                                                                    |        |        |        |        |
|--------|-------|--------|--------|--------|------------------------------------------------------------------------------------|--------|--------|--------|--------|
|        |       |        |        |        | $\langle 2272   R^0, b^0, s_{\text{sym}}^1, s_{\text{asym}}^0, t^0, s_X^0 \rangle$ | 0.19%  | 0.002  | -0.017 | 0.000  |
| 5303.8 | 0.066 | -0.001 | 0.002  | 0.000  | $\langle 2274   R^4, b^0, s_{\text{sym}}^0, s_{\text{asym}}^0, t^3, s_X^0 \rangle$ | 25.00% | 0.000  | 0.000  | 0.000  |
|        |       |        |        |        | $\langle 2274   R^0, b^0, s_{\text{sym}}^0, s_{\text{asym}}^2, t^0, s_X^0 \rangle$ | 0.47%  | 0.000  | -0.004 | 0.000  |
|        |       |        |        |        | $\langle 2274   R^0, b^0, s_{\text{sym}}^1, s_{\text{asym}}^2, t^0, s_X^0 \rangle$ | 0.24%  | 0.000  | -0.001 | 0.000  |
|        |       |        |        |        | $\langle 2274   R^0, b^0, s_{\text{sym}}^1, s_{\text{asym}}^0, t^0, s_X^0 \rangle$ | 0.06%  | -0.001 | 0.009  | 0.000  |
| 5311.2 | 0.079 | -0.000 | -0.000 | -0.002 | $\langle 2288   R^0, b^0, s_{\text{sym}}^1, s_{\text{asym}}^0, t^1, s_X^1 \rangle$ | 22.93% | 0.000  | 0.000  | 0.000  |
|        |       |        |        |        | $\langle 2288   R^0, b^0, s_{\text{sym}}^0, s_{\text{asym}}^1, t^0, s_X^1 \rangle$ | 4.21%  | 0.000  | -0.001 | -0.001 |
|        |       |        |        |        | $\langle 2288   R^0, b^0, s_{\text{sym}}^1, s_{\text{asym}}^1, t^0, s_X^0 \rangle$ | 0.07%  | 0.000  | 0.000  | 0.004  |
|        |       |        |        |        | $\langle 2288   R^0, b^0, s_{\text{sym}}^0, s_{\text{asym}}^1, t^0, s_X^0 \rangle$ | 0.01%  | 0.000  | 0.000  | -0.004 |
| 5313.5 | 0.096 | -0.001 | 0.003  | -0.000 | $\langle 2290   R^3, b^1, s_{\text{sym}}^0, s_{\text{asym}}^0, t^2, s_X^0 \rangle$ | 4.40%  | 0.000  | 0.000  | 0.000  |
|        |       |        |        |        | $\langle 2290   R^0, b^0, s_{\text{sym}}^0, s_{\text{asym}}^2, t^0, s_X^0 \rangle$ | 1.00%  | 0.000  | -0.006 | 0.000  |
|        |       |        |        |        | $\langle 2290   R^0, b^0, s_{\text{sym}}^1, s_{\text{asym}}^2, t^0, s_X^0 \rangle$ | 0.39%  | 0.000  | -0.002 | 0.000  |
|        |       |        |        |        | $\langle 2290   R^0, b^0, s_{\text{sym}}^1, s_{\text{asym}}^0, t^0, s_X^0 \rangle$ | 0.06%  | -0.001 | 0.010  | 0.000  |
| 5316.0 | 0.055 | -0.001 | 0.002  | 0.000  | $\langle 2294   R^3, b^1, s_{\text{sym}}^0, s_{\text{asym}}^0, t^2, s_X^0 \rangle$ | 3.96%  | 0.000  | 0.000  | 0.000  |
|        |       |        |        |        | $\langle 2294   R^0, b^0, s_{\text{sym}}^0, s_{\text{asym}}^2, t^0, s_X^0 \rangle$ | 0.46%  | 0.000  | -0.004 | 0.000  |
|        |       |        |        |        | $\langle 2294   R^0, b^0, s_{\text{sym}}^1, s_{\text{asym}}^2, t^0, s_X^0 \rangle$ | 0.20%  | 0.000  | -0.001 | 0.000  |
|        |       |        |        |        | $\langle 2294   R^0, b^0, s_{\text{sym}}^1, s_{\text{asym}}^0, t^0, s_X^0 \rangle$ | 0.03%  | -0.001 | 0.007  | 0.000  |
| 5318.8 | 0.116 | -0.000 | 0.000  | 0.003  | $\langle 2299   R^4, b^0, s_{\text{sym}}^0, s_{\text{asym}}^0, t^1, s_X^0 \rangle$ | 33.98% | 0.000  | 0.000  | 0.000  |
|        |       |        |        |        | $\langle 2299   R^2, b^0, s_{\text{sym}}^0, s_{\text{asym}}^1, t^0, s_X^0 \rangle$ | 5.34%  | 0.000  | 0.000  | 0.004  |
|        |       |        |        |        | $\langle 2299   R^0, b^0, s_{\text{sym}}^1, s_{\text{asym}}^1, t^0, s_X^0 \rangle$ | 0.86%  | 0.000  | 0.000  | -0.012 |
|        |       |        |        |        | $\langle 2299   R^0, b^0, s_{\text{sym}}^0, s_{\text{asym}}^1, t^0, s_X^0 \rangle$ | 0.04%  | 0.000  | 0.000  | 0.012  |
| 5319.0 | 0.058 | 0.001  | -0.002 | -0.000 | $\langle 2300   R^3, b^1, s_{\text{sym}}^0, s_{\text{asym}}^0, t^2, s_X^0 \rangle$ | 4.25%  | 0.000  | 0.000  | 0.000  |
|        |       |        |        |        | $\langle 2300   R^0, b^0, s_{\text{sym}}^0, s_{\text{asym}}^2, t^0, s_X^0 \rangle$ | 0.64%  | 0.000  | 0.004  | 0.000  |
|        |       |        |        |        | $\langle 2300   R^0, b^0, s_{\text{sym}}^1, s_{\text{asym}}^2, t^0, s_X^0 \rangle$ | 0.24%  | 0.000  | 0.001  | 0.000  |
|        |       |        |        |        | $\langle 2300   R^0, b^0, s_{\text{sym}}^1, s_{\text{asym}}^0, t^0, s_X^0 \rangle$ | 0.05%  | 0.001  | -0.009 | 0.000  |
| 5323.7 | 0.056 | 0.000  | 0.000  | 0.002  | $\langle 2304   R^4, b^0, s_{\text{sym}}^0, s_{\text{asym}}^0, t^1, s_X^0 \rangle$ | 3.71%  | 0.000  | 0.000  | 0.000  |
|        |       |        |        |        | $\langle 2304   R^2, b^0, s_{\text{sym}}^0, s_{\text{asym}}^1, t^0, s_X^0 \rangle$ | 3.00%  | 0.000  | 0.000  | 0.003  |
|        |       |        |        |        | $\langle 2304   R^0, b^0, s_{\text{sym}}^1, s_{\text{asym}}^1, t^0, s_X^0 \rangle$ | 0.43%  | 0.000  | 0.000  | -0.009 |
|        |       |        |        |        | $\langle 2304   R^0, b^0, s_{\text{sym}}^0, s_{\text{asym}}^1, t^0, s_X^0 \rangle$ | 0.02%  | 0.000  | 0.000  | 0.009  |
| 5339.7 | 0.092 | 0.001  | -0.003 | -0.000 | $\langle 2323   R^3, b^1, s_{\text{sym}}^0, s_{\text{asym}}^0, t^1, s_X^0 \rangle$ | 4.94%  | 0.000  | 0.000  | 0.000  |
|        |       |        |        |        | $\langle 2323   R^0, b^0, s_{\text{sym}}^0, s_{\text{asym}}^2, t^0, s_X^0 \rangle$ | 1.46%  | -0.001 | 0.007  | 0.000  |
|        |       |        |        |        | $\langle 2323   R^0, b^0, s_{\text{sym}}^1, s_{\text{asym}}^2, t^0, s_X^0 \rangle$ | 0.43%  | 0.000  | 0.002  | 0.000  |
|        |       |        |        |        | $\langle 2323   R^0, b^0, s_{\text{sym}}^1, s_{\text{asym}}^0, t^0, s_X^0 \rangle$ | 0.15%  | 0.001  | -0.015 | 0.000  |
| 5341.9 | 0.058 | 0.000  | -0.002 | -0.000 | $\langle 2325   R^5, b^0, s_{\text{sym}}^0, s_{\text{asym}}^0, t^0, s_X^0 \rangle$ | 35.98% | 0.000  | 0.000  | 0.000  |
|        |       |        |        |        | $\langle 2325   R^2, b^0, s_{\text{sym}}^1, s_{\text{asym}}^0, t^0, s_X^0 \rangle$ | 0.69%  | 0.000  | 0.002  | 0.000  |
|        |       |        |        |        | $\langle 2325   R^0, b^0, s_{\text{sym}}^0, s_{\text{asym}}^2, t^0, s_X^0 \rangle$ | 0.48%  | 0.000  | 0.004  | 0.000  |
|        |       |        |        |        | $\langle 2325   R^0, b^0, s_{\text{sym}}^1, s_{\text{asym}}^0, t^0, s_X^0 \rangle$ | 0.08%  | 0.001  | -0.010 | 0.000  |
| 5344.8 | 0.053 | 0.000  | -0.002 | -0.000 | $\langle 2326   R^5, b^0, s_{\text{sym}}^0, s_{\text{asym}}^0, t^0, s_X^0 \rangle$ | 6.49%  | 0.000  | 0.000  | 0.000  |
|        |       |        |        |        | $\langle 2326   R^2, b^0, s_{\text{sym}}^1, s_{\text{asym}}^0, t^0, s_X^0 \rangle$ | 0.64%  | 0.000  | 0.002  | 0.000  |
|        |       |        |        |        | $\langle 2326   R^0, b^0, s_{\text{sym}}^0, s_{\text{asym}}^2, t^0, s_X^0 \rangle$ | 0.46%  | 0.000  | 0.004  | 0.000  |
|        |       |        |        |        | $\langle 2326   R^0, b^0, s_{\text{sym}}^1, s_{\text{asym}}^0, t^0, s_X^0 \rangle$ | 0.07%  | 0.001  | -0.010 | 0.000  |
| 5347.4 | 0.122 | -0.001 | 0.003  | -0.000 | $\langle 2327   R^1, b^1, s_{\text{sym}}^0, s_{\text{asym}}^1, t^0, s_X^0 \rangle$ | 4.53%  | 0.000  | 0.000  | 0.000  |

|        |       |        |        |        |                                                                                    |        |        |        |        |
|--------|-------|--------|--------|--------|------------------------------------------------------------------------------------|--------|--------|--------|--------|
|        |       |        |        |        | $\langle 2327   R^2, b^0, s_{\text{sym}}^1, s_{\text{asym}}^0, t^0, s_X^0 \rangle$ | 1.91%  | 0.000  | -0.003 | 0.000  |
|        |       |        |        |        | $\langle 2327   R^0, b^0, s_{\text{sym}}^0, s_{\text{asym}}^2, t^0, s_X^0 \rangle$ | 1.57%  | 0.001  | -0.007 | 0.000  |
|        |       |        |        |        | $\langle 2327   R^0, b^0, s_{\text{sym}}^1, s_{\text{asym}}^0, t^0, s_X^0 \rangle$ | 0.23%  | -0.002 | 0.018  | 0.000  |
| 5347.9 | 0.085 | -0.000 | 0.000  | 0.003  | $\langle 2328   R^2, b^0, s_{\text{sym}}^0, s_{\text{asym}}^1, t^1, s_X^0 \rangle$ | 33.80% | 0.000  | 0.000  | 0.002  |
|        |       |        |        |        | $\langle 2328   R^3, b^1, s_{\text{sym}}^0, s_{\text{asym}}^0, t^1, s_X^0 \rangle$ | 14.36% | 0.000  | 0.000  | 0.000  |
|        |       |        |        |        | $\langle 2328   R^2, b^0, s_{\text{sym}}^0, s_{\text{asym}}^1, t^0, s_X^0 \rangle$ | 2.63%  | 0.000  | 0.000  | -0.005 |
|        |       |        |        |        | $\langle 2328   R^0, b^0, s_{\text{sym}}^1, s_{\text{asym}}^1, t^0, s_X^0 \rangle$ | 0.24%  | 0.000  | 0.000  | -0.007 |
|        |       |        |        |        | $\langle 2328   R^0, b^0, s_{\text{sym}}^0, s_{\text{asym}}^1, t^0, s_X^0 \rangle$ | 0.09%  | 0.000  | 0.000  | 0.017  |
| 5379.1 | 0.055 | 0.000  | -0.000 | -0.002 | $\langle 2360   R^2, b^0, s_{\text{sym}}^1, s_{\text{asym}}^0, t^2, s_X^0 \rangle$ | 25.63% | 0.000  | 0.000  | 0.000  |
|        |       |        |        |        | $\langle 2360   R^2, b^0, s_{\text{sym}}^0, s_{\text{asym}}^1, t^0, s_X^0 \rangle$ | 0.17%  | 0.000  | 0.000  | 0.001  |
|        |       |        |        |        | $\langle 2360   R^0, b^0, s_{\text{sym}}^1, s_{\text{asym}}^1, t^0, s_X^0 \rangle$ | 0.09%  | 0.000  | 0.000  | 0.004  |
|        |       |        |        |        | $\langle 2360   R^0, b^0, s_{\text{sym}}^0, s_{\text{asym}}^1, t^0, s_X^0 \rangle$ | 0.02%  | 0.000  | 0.000  | -0.009 |
| 5382.4 | 0.175 | 0.001  | -0.004 | -0.000 | $\langle 2364   R^2, b^2, s_{\text{sym}}^0, s_{\text{asym}}^0, t^1, s_X^0 \rangle$ | 10.40% | 0.000  | 0.000  | 0.000  |
|        |       |        |        |        | $\langle 2364   R^0, b^0, s_{\text{sym}}^0, s_{\text{asym}}^1, t^1, s_X^0 \rangle$ | 0.24%  | 0.000  | 0.000  | 0.000  |
|        |       |        |        |        | $\langle 2364   R^0, b^0, s_{\text{sym}}^1, s_{\text{asym}}^0, t^0, s_X^0 \rangle$ | 0.07%  | 0.001  | -0.010 | 0.000  |
| 5387.8 | 0.123 | 0.001  | -0.003 | -0.000 | $\langle 2374   R^2, b^0, s_{\text{sym}}^1, s_{\text{asym}}^0, t^2, s_X^0 \rangle$ | 28.24% | 0.000  | 0.000  | 0.000  |
|        |       |        |        |        | $\langle 2374   R^0, b^0, s_{\text{sym}}^1, s_{\text{asym}}^2, t^0, s_X^0 \rangle$ | 0.31%  | 0.000  | 0.002  | 0.000  |
|        |       |        |        |        | $\langle 2374   R^0, b^0, s_{\text{sym}}^0, s_{\text{asym}}^2, t^0, s_X^0 \rangle$ | 0.25%  | 0.000  | 0.003  | 0.000  |
|        |       |        |        |        | $\langle 2374   R^0, b^0, s_{\text{sym}}^1, s_{\text{asym}}^0, t^0, s_X^0 \rangle$ | 0.05%  | 0.001  | -0.009 | 0.000  |
| 5389.9 | 0.058 | -0.000 | 0.002  | 0.000  | $\langle 2376   R^2, b^0, s_{\text{sym}}^0, s_{\text{asym}}^1, t^3, s_X^0 \rangle$ | 27.02% | 0.000  | 0.000  | 0.000  |
|        |       |        |        |        | $\langle 2376   R^0, b^0, s_{\text{sym}}^0, s_{\text{asym}}^2, t^0, s_X^0 \rangle$ | 0.15%  | 0.000  | -0.002 | 0.000  |
|        |       |        |        |        | $\langle 2376   R^0, b^0, s_{\text{sym}}^1, s_{\text{asym}}^2, t^0, s_X^0 \rangle$ | 0.15%  | 0.000  | -0.001 | 0.000  |
|        |       |        |        |        | $\langle 2376   R^0, b^0, s_{\text{sym}}^1, s_{\text{asym}}^0, t^0, s_X^0 \rangle$ | 0.03%  | -0.001 | 0.006  | 0.000  |
| 5393.1 | 0.141 | -0.001 | 0.003  | 0.000  | $\langle 2383   R^2, b^0, s_{\text{sym}}^1, s_{\text{asym}}^0, t^0, s_X^0 \rangle$ | 13.36% | 0.000  | -0.001 | 0.000  |
|        |       |        |        |        | $\langle 2383   R^0, b^0, s_{\text{sym}}^1, s_{\text{asym}}^2, t^0, s_X^0 \rangle$ | 0.39%  | 0.000  | -0.002 | 0.000  |
|        |       |        |        |        | $\langle 2383   R^0, b^0, s_{\text{sym}}^0, s_{\text{asym}}^2, t^0, s_X^0 \rangle$ | 0.38%  | 0.000  | -0.003 | 0.000  |
|        |       |        |        |        | $\langle 2383   R^0, b^0, s_{\text{sym}}^1, s_{\text{asym}}^0, t^0, s_X^0 \rangle$ | 0.03%  | -0.001 | 0.007  | 0.000  |
| 5403.6 | 0.403 | 0.000  | -0.000 | 0.005  | $\langle 2403   R^2, b^0, s_{\text{sym}}^0, s_{\text{asym}}^1, t^2, s_X^0 \rangle$ | 10.06% | 0.000  | 0.000  | 0.000  |
|        |       |        |        |        | $\langle 2403   R^0, b^0, s_{\text{sym}}^1, s_{\text{asym}}^1, t^0, s_X^0 \rangle$ | 0.78%  | 0.000  | 0.000  | -0.012 |
|        |       |        |        |        | $\langle 2403   R^0, b^0, s_{\text{sym}}^0, s_{\text{asym}}^1, t^0, s_X^0 \rangle$ | 0.20%  | 0.000  | 0.000  | 0.026  |
|        |       |        |        |        | $\langle 2403   R^0, b^0, s_{\text{sym}}^0, s_{\text{asym}}^1, t^1, s_X^0 \rangle$ | 0.10%  | 0.000  | 0.000  | 0.002  |
| 5404.2 | 0.256 | -0.001 | 0.004  | 0.000  | $\langle 2404   R^4, b^0, s_{\text{sym}}^0, s_{\text{asym}}^0, t^0, s_X^0 \rangle$ | 64.82% | 0.000  | 0.000  | 0.000  |
|        |       |        |        |        | $\langle 2404   R^2, b^0, s_{\text{sym}}^1, s_{\text{asym}}^0, t^0, s_X^0 \rangle$ | 4.54%  | 0.000  | -0.004 | 0.000  |
|        |       |        |        |        | $\langle 2404   R^0, b^0, s_{\text{sym}}^0, s_{\text{asym}}^2, t^0, s_X^0 \rangle$ | 1.06%  | 0.000  | -0.006 | 0.000  |
|        |       |        |        |        | $\langle 2404   R^0, b^0, s_{\text{sym}}^1, s_{\text{asym}}^0, t^0, s_X^0 \rangle$ | 0.24%  | -0.002 | 0.019  | 0.000  |
| 5417.3 | 0.887 | 0.000  | -0.000 | -0.008 | $\langle 2416   R^2, b^2, s_{\text{sym}}^0, s_{\text{asym}}^0, t^0, s_X^0 \rangle$ | 13.70% | 0.000  | 0.000  | 0.000  |
|        |       |        |        |        | $\langle 2416   R^1, b^1, s_{\text{sym}}^0, s_{\text{asym}}^1, t^0, s_X^0 \rangle$ | 11.58% | 0.000  | 0.000  | 0.003  |
|        |       |        |        |        | $\langle 2416   R^0, b^0, s_{\text{sym}}^1, s_{\text{asym}}^1, t^0, s_X^0 \rangle$ | 2.62%  | 0.000  | 0.000  | 0.022  |
|        |       |        |        |        | $\langle 2416   R^0, b^0, s_{\text{sym}}^0, s_{\text{asym}}^1, t^0, s_X^0 \rangle$ | 0.56%  | 0.000  | 0.000  | -0.043 |
|        |       |        |        |        | $\langle 2416   R^0, b^0, s_{\text{sym}}^1, s_{\text{asym}}^3, t^0, s_X^0 \rangle$ | 0.21%  | 0.000  | 0.000  | 0.003  |
| 5422.4 | 0.242 | 0.000  | -0.000 | -0.004 | $\langle 2423   R^2, b^0, s_{\text{sym}}^0, s_{\text{asym}}^0, t^3, s_X^1 \rangle$ | 4.68%  | 0.000  | 0.000  | 0.000  |
|        |       |        |        |        | $\langle 2423   R^0, b^0, s_{\text{sym}}^1, s_{\text{asym}}^1, t^0, s_X^0 \rangle$ | 0.67%  | 0.000  | 0.000  | 0.011  |

|        |       |        |        |        |                                                                                    |        |        |        |        |
|--------|-------|--------|--------|--------|------------------------------------------------------------------------------------|--------|--------|--------|--------|
|        |       |        |        |        | $\langle 2423   R^0, b^0, s_{\text{sym}}^0, s_{\text{asym}}^1, t^0, s_X^0 \rangle$ | 0.13%  | 0.000  | 0.000  | -0.021 |
|        |       |        |        |        | $\langle 2423   R^0, b^0, s_{\text{sym}}^1, s_{\text{asym}}^3, t^0, s_X^0 \rangle$ | 0.06%  | 0.000  | 0.000  | 0.002  |
| 5422.9 | 4.333 | -0.000 | 0.000  | -0.018 | $\langle 2425   R^0, b^0, s_{\text{sym}}^1, s_{\text{asym}}^1, t^0, s_X^0 \rangle$ | 12.15% | 0.000  | 0.000  | 0.047  |
|        |       |        |        |        | $\langle 2425   R^0, b^0, s_{\text{sym}}^0, s_{\text{asym}}^1, t^0, s_X^0 \rangle$ | 2.46%  | 0.000  | 0.000  | -0.090 |
|        |       |        |        |        | $\langle 2425   R^0, b^0, s_{\text{sym}}^1, s_{\text{asym}}^3, t^0, s_X^0 \rangle$ | 1.03%  | 0.000  | 0.000  | 0.007  |
| 5433.0 | 0.159 | 0.000  | -0.000 | -0.003 | $\langle 2441   R^2, b^0, s_{\text{sym}}^0, s_{\text{asym}}^1, t^0, s_X^0 \rangle$ | 25.74% | 0.000  | 0.000  | 0.009  |
|        |       |        |        |        | $\langle 2441   R^3, b^1, s_{\text{sym}}^0, s_{\text{asym}}^0, t^0, s_X^0 \rangle$ | 11.27% | 0.000  | 0.000  | 0.000  |
|        |       |        |        |        | $\langle 2441   R^0, b^0, s_{\text{sym}}^1, s_{\text{asym}}^1, t^0, s_X^0 \rangle$ | 0.71%  | 0.000  | 0.000  | 0.011  |
|        |       |        |        |        | $\langle 2441   R^0, b^0, s_{\text{sym}}^0, s_{\text{asym}}^1, t^0, s_X^0 \rangle$ | 0.25%  | 0.000  | 0.000  | -0.028 |
| 5438.2 | 0.122 | 0.000  | -0.000 | -0.003 | $\langle 2451   R^2, b^0, s_{\text{sym}}^1, s_{\text{asym}}^0, t^1, s_X^0 \rangle$ | 11.50% | 0.000  | 0.000  | 0.000  |
|        |       |        |        |        | $\langle 2451   R^3, b^1, s_{\text{sym}}^0, s_{\text{asym}}^0, t^2, s_X^0 \rangle$ | 10.10% | 0.000  | 0.000  | 0.000  |
|        |       |        |        |        | $\langle 2451   R^2, b^2, s_{\text{sym}}^0, s_{\text{asym}}^0, t^0, s_X^0 \rangle$ | 5.62%  | 0.000  | 0.000  | 0.000  |
|        |       |        |        |        | $\langle 2451   R^0, b^0, s_{\text{sym}}^1, s_{\text{asym}}^1, t^0, s_X^0 \rangle$ | 0.59%  | 0.000  | 0.000  | 0.010  |
|        |       |        |        |        | $\langle 2451   R^2, b^0, s_{\text{sym}}^0, s_{\text{asym}}^1, t^0, s_X^0 \rangle$ | 0.49%  | 0.000  | 0.000  | 0.002  |
|        |       |        |        |        | $\langle 2451   R^0, b^0, s_{\text{sym}}^0, s_{\text{asym}}^1, t^0, s_X^0 \rangle$ | 0.13%  | 0.000  | 0.000  | -0.021 |
| 5451.8 | 1.405 | 0.002  | -0.010 | -0.000 | $\langle 2468   R^2, b^0, s_{\text{sym}}^1, s_{\text{asym}}^0, t^0, s_X^0 \rangle$ | 19.31% | 0.000  | 0.002  | 0.000  |
|        |       |        |        |        | $\langle 2468   R^0, b^0, s_{\text{sym}}^0, s_{\text{asym}}^2, t^0, s_X^0 \rangle$ | 9.87%  | -0.001 | 0.017  | 0.000  |
|        |       |        |        |        | $\langle 2468   R^0, b^0, s_{\text{sym}}^1, s_{\text{asym}}^2, t^0, s_X^0 \rangle$ | 4.82%  | -0.001 | 0.007  | 0.000  |
|        |       |        |        |        | $\langle 2468   R^0, b^0, s_{\text{sym}}^1, s_{\text{asym}}^0, t^0, s_X^0 \rangle$ | 1.37%  | 0.004  | -0.044 | 0.000  |
| 5453.1 | 0.059 | 0.000  | -0.002 | -0.000 | $\langle 2469   R^2, b^0, s_{\text{sym}}^1, s_{\text{asym}}^0, t^3, s_X^0 \rangle$ | 14.12% | 0.000  | 0.000  | 0.000  |
|        |       |        |        |        | $\langle 2469   R^0, b^0, s_{\text{sym}}^0, s_{\text{asym}}^2, t^0, s_X^0 \rangle$ | 0.43%  | 0.000  | 0.004  | 0.000  |
|        |       |        |        |        | $\langle 2469   R^0, b^0, s_{\text{sym}}^1, s_{\text{asym}}^2, t^0, s_X^0 \rangle$ | 0.21%  | 0.000  | 0.001  | 0.000  |
|        |       |        |        |        | $\langle 2469   R^0, b^0, s_{\text{sym}}^1, s_{\text{asym}}^0, t^0, s_X^0 \rangle$ | 0.05%  | 0.001  | -0.009 | 0.000  |
| 5463.0 | 0.161 | -0.000 | -0.000 | -0.003 | $\langle 2478   R^3, b^1, s_{\text{sym}}^0, s_{\text{asym}}^0, t^2, s_X^0 \rangle$ | 10.69% | 0.000  | 0.000  | 0.000  |
|        |       |        |        |        | $\langle 2478   R^0, b^0, s_{\text{sym}}^1, s_{\text{asym}}^1, t^0, s_X^0 \rangle$ | 0.59%  | 0.000  | 0.000  | 0.010  |
|        |       |        |        |        | $\langle 2478   R^2, b^0, s_{\text{sym}}^0, s_{\text{asym}}^1, t^0, s_X^0 \rangle$ | 0.41%  | 0.000  | 0.000  | -0.002 |
|        |       |        |        |        | $\langle 2478   R^0, b^0, s_{\text{sym}}^0, s_{\text{asym}}^1, t^0, s_X^0 \rangle$ | 0.08%  | 0.000  | 0.000  | -0.016 |
| 5517.1 | 0.190 | -0.000 | -0.000 | -0.004 | $\langle 2556   R^2, b^2, s_{\text{sym}}^0, s_{\text{asym}}^0, t^0, s_X^0 \rangle$ | 6.83%  | 0.000  | 0.000  | 0.000  |
|        |       |        |        |        | $\langle 2556   R^2, b^0, s_{\text{sym}}^1, s_{\text{asym}}^0, t^0, s_X^0 \rangle$ | 6.28%  | 0.000  | 0.000  | 0.000  |
|        |       |        |        |        | $\langle 2556   R^1, b^1, s_{\text{sym}}^0, s_{\text{asym}}^1, t^0, s_X^0 \rangle$ | 5.65%  | 0.000  | 0.000  | 0.002  |
|        |       |        |        |        | $\langle 2556   R^0, b^0, s_{\text{sym}}^1, s_{\text{asym}}^1, t^0, s_X^0 \rangle$ | 0.72%  | 0.000  | 0.000  | 0.011  |
|        |       |        |        |        | $\langle 2556   R^0, b^0, s_{\text{sym}}^0, s_{\text{asym}}^1, t^0, s_X^0 \rangle$ | 0.14%  | 0.000  | 0.000  | -0.021 |
| 5518.6 | 1.112 | 0.000  | -0.000 | 0.009  | $\langle 2557   R^0, b^0, s_{\text{sym}}^1, s_{\text{asym}}^1, t^0, s_X^0 \rangle$ | 5.24%  | 0.000  | 0.000  | -0.031 |
|        |       |        |        |        | $\langle 2557   R^0, b^0, s_{\text{sym}}^0, s_{\text{asym}}^1, t^0, s_X^0 \rangle$ | 0.63%  | 0.000  | 0.000  | 0.046  |
|        |       |        |        |        | $\langle 2557   R^0, b^0, s_{\text{sym}}^1, s_{\text{asym}}^3, t^0, s_X^0 \rangle$ | 0.30%  | 0.000  | 0.000  | -0.004 |
| 5527.0 | 0.069 | 0.000  | 0.000  | 0.002  | $\langle 2575   R^2, b^2, s_{\text{sym}}^0, s_{\text{asym}}^0, t^0, s_X^0 \rangle$ | 7.71%  | 0.000  | 0.000  | 0.000  |
|        |       |        |        |        | $\langle 2575   R^1, b^1, s_{\text{sym}}^0, s_{\text{asym}}^1, t^0, s_X^0 \rangle$ | 6.08%  | 0.000  | 0.000  | -0.002 |
|        |       |        |        |        | $\langle 2575   R^2, b^0, s_{\text{sym}}^1, s_{\text{asym}}^0, t^0, s_X^0 \rangle$ | 5.19%  | 0.000  | 0.000  | 0.000  |
|        |       |        |        |        | $\langle 2575   R^0, b^0, s_{\text{sym}}^1, s_{\text{asym}}^1, t^0, s_X^0 \rangle$ | 0.27%  | 0.000  | 0.000  | -0.007 |
|        |       |        |        |        | $\langle 2575   R^0, b^0, s_{\text{sym}}^0, s_{\text{asym}}^1, t^0, s_X^0 \rangle$ | 0.06%  | 0.000  | 0.000  | 0.014  |
| 5565.8 | 0.177 | -0.000 | 0.000  | -0.004 | $\langle 2624   R^2, b^0, s_{\text{sym}}^0, s_{\text{asym}}^1, t^0, s_X^0 \rangle$ | 16.66% | 0.000  | 0.000  | -0.003 |
|        |       |        |        |        | $\langle 2624   R^3, b^1, s_{\text{sym}}^0, s_{\text{asym}}^0, t^0, s_X^0 \rangle$ | 15.19% | 0.000  | 0.000  | 0.000  |

|        |       |        |        |        |                                                                                    |        |        |        |        |
|--------|-------|--------|--------|--------|------------------------------------------------------------------------------------|--------|--------|--------|--------|
|        |       |        |        |        | $\langle 2624   R^0, b^0, s_{\text{sym}}^1, s_{\text{asym}}^1, t^0, s_X^0 \rangle$ | 0.49%  | 0.000  | 0.000  | 0.009  |
|        |       |        |        |        | $\langle 2624   R^0, b^0, s_{\text{sym}}^0, s_{\text{asym}}^1, t^0, s_X^0 \rangle$ | 0.06%  | 0.000  | 0.000  | -0.014 |
| 5585.7 | 0.176 | 0.000  | -0.000 | -0.004 | $\langle 2664   R^3, b^0, s_{\text{sym}}^0, s_{\text{asym}}^1, t^0, s_X^0 \rangle$ | 22.20% | 0.000  | 0.000  | -0.002 |
|        |       |        |        |        | $\langle 2664   R^4, b^1, s_{\text{sym}}^0, s_{\text{asym}}^0, t^0, s_X^0 \rangle$ | 18.06% | 0.000  | 0.000  | 0.000  |
|        |       |        |        |        | $\langle 2664   R^2, b^2, s_{\text{sym}}^0, s_{\text{asym}}^0, t^0, s_X^0 \rangle$ | 7.76%  | 0.000  | 0.000  | 0.000  |
|        |       |        |        |        | $\langle 2664   R^2, b^0, s_{\text{sym}}^0, s_{\text{asym}}^1, t^0, s_X^0 \rangle$ | 1.53%  | 0.000  | 0.000  | 0.003  |
|        |       |        |        |        | $\langle 2664   R^0, b^0, s_{\text{sym}}^1, s_{\text{asym}}^1, t^0, s_X^0 \rangle$ | 0.40%  | 0.000  | 0.000  | 0.009  |
|        |       |        |        |        | $\langle 2664   R^0, b^0, s_{\text{sym}}^0, s_{\text{asym}}^1, t^0, s_X^0 \rangle$ | 0.05%  | 0.000  | 0.000  | -0.013 |
| 5610.2 | 0.090 | -0.000 | 0.003  | 0.000  | $\langle 2704   R^2, b^2, s_{\text{sym}}^0, s_{\text{asym}}^0, t^0, s_X^0 \rangle$ | 19.44% | 0.000  | 0.000  | 0.000  |
|        |       |        |        |        | $\langle 2704   R^1, b^1, s_{\text{sym}}^0, s_{\text{asym}}^1, t^0, s_X^0 \rangle$ | 11.20% | 0.000  | 0.000  | 0.000  |
|        |       |        |        |        | $\langle 2704   R^0, b^0, s_{\text{sym}}^0, s_{\text{asym}}^1, t^1, s_X^0 \rangle$ | 1.00%  | 0.000  | 0.002  | 0.000  |
|        |       |        |        |        | $\langle 2704   R^0, b^0, s_{\text{sym}}^0, s_{\text{asym}}^2, t^0, s_X^0 \rangle$ | 0.95%  | 0.000  | 0.005  | 0.000  |
| 5634.6 | 0.055 | 0.000  | -0.002 | -0.000 | $\langle 2744   R^0, b^3, s_{\text{sym}}^0, s_{\text{asym}}^0, t^4, s_X^0 \rangle$ | 4.33%  | 0.000  | 0.000  | 0.000  |
|        |       |        |        |        | $\langle 2744   R^0, b^0, s_{\text{sym}}^0, s_{\text{asym}}^2, t^0, s_X^0 \rangle$ | 0.28%  | 0.000  | 0.003  | 0.000  |
|        |       |        |        |        | $\langle 2744   R^0, b^0, s_{\text{sym}}^0, s_{\text{asym}}^1, t^1, s_X^0 \rangle$ | 0.15%  | 0.000  | 0.001  | 0.002  |
|        |       |        |        |        | $\langle 2744   R^0, b^0, s_{\text{sym}}^1, s_{\text{asym}}^0, t^0, s_X^0 \rangle$ | 0.03%  | 0.001  | -0.006 | 0.000  |
| 5636.3 | 0.056 | 0.000  | -0.002 | -0.000 | $\langle 2746   R^2, b^0, s_{\text{sym}}^1, s_{\text{asym}}^0, t^4, s_X^0 \rangle$ | 8.30%  | 0.000  | 0.000  | 0.000  |
|        |       |        |        |        | $\langle 2746   R^0, b^0, s_{\text{sym}}^0, s_{\text{asym}}^2, t^1, s_X^0 \rangle$ | 1.23%  | 0.000  | 0.001  | 0.002  |
|        |       |        |        |        | $\langle 2746   R^0, b^0, s_{\text{sym}}^0, s_{\text{asym}}^2, t^0, s_X^0 \rangle$ | 0.35%  | 0.000  | 0.003  | 0.000  |
|        |       |        |        |        | $\langle 2746   R^0, b^0, s_{\text{sym}}^1, s_{\text{asym}}^0, t^0, s_X^0 \rangle$ | 0.03%  | 0.001  | -0.007 | 0.000  |
| 5663.0 | 0.123 | 0.000  | -0.000 | -0.003 | $\langle 2787   R^1, b^1, s_{\text{sym}}^1, s_{\text{asym}}^0, t^0, s_X^0 \rangle$ | 28.32% | 0.000  | 0.000  | 0.001  |
|        |       |        |        |        | $\langle 2787   R^0, b^0, s_{\text{sym}}^0, s_{\text{asym}}^1, t^1, s_X^0 \rangle$ | 1.00%  | 0.000  | 0.000  | -0.008 |
|        |       |        |        |        | $\langle 2787   R^0, b^0, s_{\text{sym}}^1, s_{\text{asym}}^1, t^0, s_X^0 \rangle$ | 0.17%  | 0.000  | 0.000  | -0.006 |
| 5692.4 | 0.057 | 0.001  | -0.002 | 0.000  | $\langle 2831   R^2, b^0, s_{\text{sym}}^0, s_{\text{asym}}^1, t^2, s_X^0 \rangle$ | 10.94% | 0.000  | 0.000  | 0.000  |
|        |       |        |        |        | $\langle 2831   R^0, b^0, s_{\text{sym}}^0, s_{\text{asym}}^2, t^0, s_X^0 \rangle$ | 1.30%  | -0.001 | 0.006  | 0.000  |
|        |       |        |        |        | $\langle 2831   R^0, b^0, s_{\text{sym}}^1, s_{\text{asym}}^2, t^0, s_X^0 \rangle$ | 0.52%  | 0.000  | 0.002  | 0.000  |
|        |       |        |        |        | $\langle 2831   R^0, b^0, s_{\text{sym}}^1, s_{\text{asym}}^0, t^0, s_X^0 \rangle$ | 0.08%  | 0.001  | -0.011 | 0.000  |
| 5695.3 | 0.135 | 0.001  | -0.003 | -0.000 | $\langle 2839   R^0, b^0, s_{\text{sym}}^0, s_{\text{asym}}^2, t^0, s_X^0 \rangle$ | 3.19%  | -0.001 | 0.010  | 0.000  |
|        |       |        |        |        | $\langle 2839   R^0, b^0, s_{\text{sym}}^1, s_{\text{asym}}^2, t^0, s_X^0 \rangle$ | 1.24%  | -0.001 | 0.003  | 0.000  |
|        |       |        |        |        | $\langle 2839   R^0, b^0, s_{\text{sym}}^1, s_{\text{asym}}^0, t^0, s_X^0 \rangle$ | 0.19%  | 0.002  | -0.017 | 0.000  |
| 5697.1 | 0.483 | -0.000 | 0.000  | 0.006  | $\langle 2841   R^0, b^0, s_{\text{sym}}^1, s_{\text{asym}}^1, t^0, s_X^0 \rangle$ | 3.29%  | 0.000  | 0.000  | -0.024 |
|        |       |        |        |        | $\langle 2841   R^0, b^0, s_{\text{sym}}^0, s_{\text{asym}}^1, t^0, s_X^0 \rangle$ | 0.35%  | 0.000  | 0.000  | 0.034  |
|        |       |        |        |        | $\langle 2841   R^0, b^0, s_{\text{sym}}^1, s_{\text{asym}}^3, t^0, s_X^0 \rangle$ | 0.17%  | 0.000  | 0.000  | -0.003 |
| 5698.0 | 0.186 | -0.000 | -0.000 | -0.004 | $\langle 2843   R^2, b^0, s_{\text{sym}}^1, s_{\text{asym}}^0, t^3, s_X^0 \rangle$ | 24.60% | 0.000  | 0.000  | 0.000  |
|        |       |        |        |        | $\langle 2843   R^0, b^0, s_{\text{sym}}^1, s_{\text{asym}}^1, t^0, s_X^0 \rangle$ | 1.52%  | 0.000  | 0.000  | 0.017  |
|        |       |        |        |        | $\langle 2843   R^0, b^0, s_{\text{sym}}^0, s_{\text{asym}}^1, t^0, s_X^0 \rangle$ | 0.13%  | 0.000  | 0.000  | -0.021 |
|        |       |        |        |        | $\langle 2843   R^0, b^0, s_{\text{sym}}^1, s_{\text{asym}}^3, t^0, s_X^0 \rangle$ | 0.07%  | 0.000  | 0.000  | 0.002  |
| 5699.9 | 0.286 | 0.000  | -0.000 | 0.004  | $\langle 2844   R^4, b^0, s_{\text{sym}}^0, s_{\text{asym}}^0, t^3, s_X^0 \rangle$ | 2.54%  | 0.000  | 0.000  | 0.000  |
|        |       |        |        |        | $\langle 2844   R^0, b^0, s_{\text{sym}}^1, s_{\text{asym}}^1, t^0, s_X^0 \rangle$ | 2.09%  | 0.000  | 0.000  | -0.019 |
|        |       |        |        |        | $\langle 2844   R^0, b^0, s_{\text{sym}}^0, s_{\text{asym}}^2, t^1, s_X^0 \rangle$ | 1.14%  | 0.000  | 0.001  | 0.002  |
|        |       |        |        |        | $\langle 2844   R^0, b^0, s_{\text{sym}}^0, s_{\text{asym}}^1, t^0, s_X^0 \rangle$ | 0.19%  | 0.000  | 0.000  | 0.025  |
| 5701.5 | 0.068 | 0.000  | -0.000 | 0.002  | $\langle 2847   R^2, b^0, s_{\text{sym}}^1, s_{\text{asym}}^0, t^1, s_X^0 \rangle$ | 12.42% | 0.000  | 0.000  | 0.000  |

|        |       |        |        |        |                                                                                    |        |       |        |        |
|--------|-------|--------|--------|--------|------------------------------------------------------------------------------------|--------|-------|--------|--------|
|        |       |        |        |        | $\langle 2847   R^1, b^1, s_{\text{sym}}^0, s_{\text{asym}}^1, t^0, s_X^0 \rangle$ | 1.48%  | 0.000 | 0.000  | -0.001 |
|        |       |        |        |        | $\langle 2847   R^0, b^0, s_{\text{sym}}^1, s_{\text{asym}}^1, t^0, s_X^0 \rangle$ | 0.46%  | 0.000 | 0.000  | -0.009 |
|        |       |        |        |        | $\langle 2847   R^0, b^0, s_{\text{sym}}^0, s_{\text{asym}}^1, t^0, s_X^0 \rangle$ | 0.06%  | 0.000 | 0.000  | 0.014  |
| 5706.7 | 0.141 | -0.000 | 0.000  | 0.003  | $\langle 2854   R^2, b^0, s_{\text{sym}}^0, s_{\text{asym}}^1, t^2, s_X^0 \rangle$ | 4.17%  | 0.000 | 0.000  | 0.000  |
|        |       |        |        |        | $\langle 2854   R^0, b^0, s_{\text{sym}}^1, s_{\text{asym}}^1, t^0, s_X^0 \rangle$ | 1.21%  | 0.000 | 0.000  | -0.015 |
|        |       |        |        |        | $\langle 2854   R^0, b^0, s_{\text{sym}}^0, s_{\text{asym}}^2, t^1, s_X^0 \rangle$ | 0.46%  | 0.000 | 0.001  | 0.001  |
|        |       |        |        |        | $\langle 2854   R^0, b^0, s_{\text{sym}}^0, s_{\text{asym}}^1, t^0, s_X^0 \rangle$ | 0.11%  | 0.000 | 0.000  | 0.019  |
| 5752.0 | 0.056 | -0.000 | 0.000  | -0.002 | $\langle 2934   R^3, b^1, s_{\text{sym}}^0, s_{\text{asym}}^0, t^3, s_X^0 \rangle$ | 2.43%  | 0.000 | 0.000  | 0.000  |
|        |       |        |        |        | $\langle 2934   R^0, b^0, s_{\text{sym}}^1, s_{\text{asym}}^1, t^1, s_X^0 \rangle$ | 0.86%  | 0.000 | -0.001 | -0.002 |
|        |       |        |        |        | $\langle 2934   R^0, b^0, s_{\text{sym}}^1, s_{\text{asym}}^1, t^0, s_X^0 \rangle$ | 0.66%  | 0.000 | 0.000  | 0.011  |
|        |       |        |        |        | $\langle 2934   R^0, b^0, s_{\text{sym}}^0, s_{\text{asym}}^1, t^0, s_X^0 \rangle$ | 0.07%  | 0.000 | 0.000  | -0.015 |
| 5773.0 | 0.074 | -0.000 | 0.000  | -0.002 | $\langle 2966   R^2, b^2, s_{\text{sym}}^0, s_{\text{asym}}^0, t^2, s_X^0 \rangle$ | 3.42%  | 0.000 | 0.000  | 0.000  |
|        |       |        |        |        | $\langle 2966   R^0, b^0, s_{\text{sym}}^1, s_{\text{asym}}^1, t^0, s_X^0 \rangle$ | 0.79%  | 0.000 | 0.000  | 0.012  |
|        |       |        |        |        | $\langle 2966   R^0, b^0, s_{\text{sym}}^1, s_{\text{asym}}^1, t^1, s_X^0 \rangle$ | 0.56%  | 0.000 | -0.001 | -0.001 |
|        |       |        |        |        | $\langle 2966   R^0, b^0, s_{\text{sym}}^0, s_{\text{asym}}^1, t^0, s_X^0 \rangle$ | 0.08%  | 0.000 | 0.000  | -0.016 |
| 5793.0 | 0.089 | 0.000  | -0.000 | 0.002  | $\langle 2994   R^2, b^2, s_{\text{sym}}^0, s_{\text{asym}}^0, t^1, s_X^0 \rangle$ | 3.12%  | 0.000 | 0.000  | 0.000  |
|        |       |        |        |        | $\langle 2994   R^0, b^0, s_{\text{sym}}^1, s_{\text{asym}}^1, t^0, s_X^0 \rangle$ | 1.15%  | 0.000 | 0.000  | -0.014 |
|        |       |        |        |        | $\langle 2994   R^0, b^0, s_{\text{sym}}^0, s_{\text{asym}}^1, t^0, s_X^0 \rangle$ | 0.11%  | 0.000 | 0.000  | 0.019  |
|        |       |        |        |        | $\langle 2994   R^0, b^0, s_{\text{sym}}^1, s_{\text{asym}}^3, t^0, s_X^0 \rangle$ | 0.04%  | 0.000 | 0.000  | -0.001 |
| 5824.5 | 0.087 | -0.000 | 0.002  | 0.000  | $\langle 3056   R^2, b^2, s_{\text{sym}}^0, s_{\text{asym}}^0, t^3, s_X^0 \rangle$ | 11.24% | 0.000 | 0.000  | 0.000  |
|        |       |        |        |        | $\langle 3056   R^0, b^0, s_{\text{sym}}^2, s_{\text{asym}}^0, t^0, s_X^0 \rangle$ | 3.35%  | 0.000 | -0.001 | 0.000  |
|        |       |        |        |        | $\langle 3056   R^0, b^0, s_{\text{sym}}^0, s_{\text{asym}}^2, t^0, s_X^0 \rangle$ | 0.39%  | 0.000 | 0.003  | 0.000  |
|        |       |        |        |        | $\langle 3056   R^0, b^0, s_{\text{sym}}^1, s_{\text{asym}}^0, t^0, s_X^0 \rangle$ | 0.01%  | 0.000 | 0.003  | 0.000  |
| 5827.8 | 0.061 | -0.000 | 0.002  | 0.000  | $\langle 3064   R^4, b^1, s_{\text{sym}}^0, s_{\text{asym}}^0, t^1, s_X^0 \rangle$ | 4.28%  | 0.000 | 0.000  | 0.000  |
|        |       |        |        |        | $\langle 3064   R^0, b^0, s_{\text{sym}}^2, s_{\text{asym}}^0, t^0, s_X^0 \rangle$ | 2.32%  | 0.000 | -0.001 | 0.000  |
|        |       |        |        |        | $\langle 3064   R^0, b^0, s_{\text{sym}}^0, s_{\text{asym}}^2, t^0, s_X^0 \rangle$ | 0.17%  | 0.000 | 0.002  | 0.000  |
|        |       |        |        |        | $\langle 3064   R^0, b^0, s_{\text{sym}}^1, s_{\text{asym}}^0, t^0, s_X^0 \rangle$ | 0.01%  | 0.000 | 0.003  | 0.000  |
| 5848.2 | 0.139 | 0.001  | -0.003 | 0.000  | $\langle 3098   R^1, b^1, s_{\text{sym}}^1, s_{\text{asym}}^0, t^1, s_X^0 \rangle$ | 16.38% | 0.000 | 0.000  | 0.000  |
|        |       |        |        |        | $\langle 3098   R^0, b^0, s_{\text{sym}}^2, s_{\text{asym}}^0, t^0, s_X^0 \rangle$ | 4.75%  | 0.000 | 0.002  | 0.000  |
|        |       |        |        |        | $\langle 3098   R^0, b^0, s_{\text{sym}}^0, s_{\text{asym}}^2, t^0, s_X^0 \rangle$ | 0.13%  | 0.000 | -0.002 | 0.000  |
|        |       |        |        |        | $\langle 3098   R^0, b^0, s_{\text{sym}}^1, s_{\text{asym}}^0, t^0, s_X^0 \rangle$ | 0.02%  | 0.000 | -0.005 | 0.000  |
| 5879.3 | 0.068 | -0.000 | 0.000  | -0.002 | $\langle 3166   R^1, b^1, s_{\text{sym}}^0, s_{\text{asym}}^1, t^1, s_X^0 \rangle$ | 2.20%  | 0.000 | 0.000  | 0.000  |
|        |       |        |        |        | $\langle 3166   R^2, b^0, s_{\text{sym}}^0, s_{\text{asym}}^1, t^0, s_X^0 \rangle$ | 0.51%  | 0.000 | 0.000  | -0.002 |
|        |       |        |        |        | $\langle 3166   R^0, b^0, s_{\text{sym}}^1, s_{\text{asym}}^1, t^0, s_X^0 \rangle$ | 0.22%  | 0.000 | 0.000  | 0.006  |
|        |       |        |        |        | $\langle 3166   R^0, b^0, s_{\text{sym}}^0, s_{\text{asym}}^1, t^0, s_X^0 \rangle$ | 0.04%  | 0.000 | 0.000  | -0.011 |
| 6002.1 | 0.094 | 0.000  | -0.000 | -0.003 | $\langle 3400   R^1, b^1, s_{\text{sym}}^1, s_{\text{asym}}^0, t^0, s_X^0 \rangle$ | 3.75%  | 0.000 | 0.000  | 0.000  |
|        |       |        |        |        | $\langle 3400   R^0, b^0, s_{\text{sym}}^2, s_{\text{asym}}^0, t^1, s_X^0 \rangle$ | 3.63%  | 0.000 | -0.001 | -0.001 |
|        |       |        |        |        | $\langle 3400   R^0, b^0, s_{\text{sym}}^1, s_{\text{asym}}^1, t^0, s_X^0 \rangle$ | 0.23%  | 0.000 | 0.000  | 0.006  |
|        |       |        |        |        | $\langle 3400   R^0, b^0, s_{\text{sym}}^0, s_{\text{asym}}^1, t^0, s_X^0 \rangle$ | 0.05%  | 0.000 | 0.000  | -0.013 |
| 6175.4 | 0.061 | 0.000  | -0.002 | 0.000  | $\langle 3766   R^0, b^2, s_{\text{sym}}^1, s_{\text{asym}}^0, t^0, s_X^0 \rangle$ | 43.83% | 0.000 | 0.005  | 0.000  |
|        |       |        |        |        | $\langle 3766   R^2, b^2, s_{\text{sym}}^0, s_{\text{asym}}^0, t^0, s_X^0 \rangle$ | 5.14%  | 0.000 | 0.000  | 0.000  |
|        |       |        |        |        | $\langle 3766   R^0, b^0, s_{\text{sym}}^0, s_{\text{asym}}^2, t^0, s_X^0 \rangle$ | 0.28%  | 0.000 | -0.003 | 0.000  |

---

$$\langle 3766 | R^0, b^0, s_{\text{sym}}^1, s_{\text{asym}}^0, t^0, s_X^0 \rangle \quad 0.02\% \quad 0.000 \quad -0.005 \quad 0.000$$
